# Supplementary material for: The HTLV-1 viral oncoproteins Tax and HBZ reprogram the cellular mRNA splicing landscape
Source: PLoS Pathog. 2021 Sep 20;17(9):e1009919. doi: 10.1371/journal.ppat.1009919 (PMC8483338; doi:10.1371/journal.ppat.1009919)
Supplement: S3 Data — Data sheet 1: ASEs detected in Jurkat iTax. Data sheet 2: ASEs detected in Jurkat iHBZ. Data sheet 3: Shared events Jurkat iTax, Jurkat iHBZ. Data sheet 4: GOrilla results AS genes in Jurkat iTax. Data sheet 5: GOrilla results AS genes in Jurkat iHBZ. Data sheet 6: Known cancer genes presenting AS in Jurkat iTax. Data sheet 7: Known cancer genes presenting AS in Jurkat iHBZ. Data sheet 8: Genes presenting DEGs and ASEs. Data sheet 9: ASEs detected in HTLV-1 carriers of the Japanese cohort. Data sheet 10: ASEs detected in ATLL of the Japanese cohort. Data sheet 11: Shared events Jurkat iTax, ATLL of the Japanese cohort. Data sheet 12: Shared events Jurkat iHBZ, ATLL of the Japanese cohort. Data sheet 13: Shared genes with ASEs between ATLL, Jurkat iTax, Jurkat iHBZ but not in HTLV-1 carriers of the Japanese cohort. Data sheet 14: ASEs detected in HTLV-1 carriers of the Afro-Caribbean cohort. Data sheet 15: ASEs detected in ATLL of the Afro-Caribbean cohort. Data sheet 16: Shared events Jurkat iTax, ATLL of the Afro-Caribbean cohort. Data sheet 17: Shared events Jurkat iHBZ, ATLL of the Afro-Caribbean cohort. Data sheet 18: Genes presenting ASEs in both cohorts. Data sheet 19: PPIs in the 26 and 50 shared genes. (XLSX) [file ppat.1009919.s010.xlsx]

## Sheet: List
List of Tables:
1	ASEs detected in Jurkat iTax
2	ASEs detected in Jurkat iHBZ
3	Shared events Jurkat iTax, Jurkat iHBZ
4	GOrilla results AS genes in Jurkat iTax
5	GOrilla results AS genes in Jurkat iHBZ
6	Known cancer genes presenting AS in Jurkat iTax
7	Known cancer genes presenting AS in Jurkat iHBZ
8	Genes presenting DEGs and ASEs
9	ASEs detected in HTLV-1 carriers of the Japanese cohort
10	ASEs detected in ATLL of the Japanese cohort
11	Shared events Jurkat iTax, ATLL of the Japanese cohort
12	Shared events Jurkat iHBZ, ATLL of the Japanese cohort
13	Shared genes with ASEs between ATLL, Jurkat iTax, Jurkat iHBZ but not in HTLV-1 carriers of the Japanese cohort
14	ASEs detected in HTLV-1 carriers of the Afro-Caribbean cohort
15	ASEs detected in ATLL of the Afro-Caribbean cohort
16	Shared events Jurkat iTax, ATLL of the Afro-Caribbean cohort
17	Shared events Jurkat iHBZ, ATLL of the Afro-Caribbean cohort
18	Genes presenting ASEs in both cohorts
19	PPIs in the 26 and 50 shared genes

## Sheet: 1
ASEs detected in Jurkat iTax
geneSymbol	Type	chr	strand	exonStart_0base	exonEnd	upstreamES	upstreamEE	downstreamES	downstreamEE	FDR	IncLevelDifference
RPLP0	SE	chr12	-	120636356	120636547	120635124	120635265	120636656	120636807	0	0.121
RPLP0	SE	chr12	-	120636356	120636602	120635124	120635265	120636656	120636803	0	0.121
RPLP0	SE	chr12	-	120636356	120636540	120635124	120635265	120636656	120636807	0	0.121
RPLP0	SE	chr12	-	120636356	120636434	120635124	120635265	120636656	120636803	0	0.12
RPLP0	SE	chr12	-	120636356	120636573	120635124	120635265	120636656	120636807	0	0.121
RPLP0	SE	chr12	-	120636356	120636437	120635124	120635265	120636656	120636807	0	0.121
ZFAS1	SE	chr20	+	47897021	47897107	47895640	47895745	47905581	47905795	0	-0.135
HSPH1	SE	chr13	-	31717928	31717985	31715258	31715396	31719699	31719905	0	-0.441
HSPH1	SE	chr13	-	31717928	31718058	31715258	31715396	31719699	31719905	0	-0.445
HSPH1	SE	chr13	-	31717928	31718060	31715258	31715396	31719699	31719905	0	-0.34
FLNA	SE	chrX	-	153580920	153581043	153580548	153580815	153581139	153581309	0	0.129
FLNA	SE	chrX	-	153580957	153581043	153580548	153580815	153581139	153581292	0	0.233
ILF2	SE	chr1	-	153635494	153635609	153635180	153635271	153635690	153635752	0	0.143
MKI67	SE	chr10	-	129913191	129914271	129911690	129911866	129914754	129914799	0	0.479
CPNE1	SE	chr20	-	34220084	34220156	34219866	34219947	34220232	34220307	0	0.196
NASP	SE	chr1	+	46072992	46074009	46072153	46072263	46078840	46078920	0	0.134
PCNXL4	SE	chr14	+	60591831	60591969	60590935	60591028	60592354	60592525	1.08373e-12	0.417
MKI67	SE	chr10	-	129914203	129914271	129911690	129911866	129914754	129914799	2.56672e-12	0.439
HNRNPD	SE	chr4	-	83292680	83292737	83280623	83280792	83294598	83295149	6.82747e-12	-0.127
ILF2	SE	chr1	-	153635498	153635609	153635163	153635271	153635690	153635752	8.36017e-12	0.258
MRPS10	SE	chr6	-	42181857	42181930	42179518	42179655	42182017	42182082	9.32946e-12	0.294
EIF4A2	SE	chr3	+	186506098	186506209	186505591	186505671	186506913	186507685	1.21919e-11	-0.102
LRRC75A-AS1	SE	chr17	+	16342894	16343017	16342640	16342728	16343498	16343567	1.56057e-11	-0.133
SREK1	SE	chr5	+	65454636	65454760	65449290	65449424	65455046	65455162	1.34021e-10	-0.439
MRPS10	SE	chr6	-	42181857	42181914	42179518	42179655	42182017	42182082	2.58469e-10	0.413
MRPS10	SE	chr6	-	42181857	42181927	42179518	42179655	42182017	42182082	3.00678e-10	0.394
LUC7L	SE	chr16	-	258599	258663	258076	258187	270647	270746	3.1764e-10	0.297
TRPT1	SE	chr11	-	63991571	63991682	63991270	63991439	63991756	63991813	3.34766e-10	0.23
LAS1L	SE	chrX	-	64744443	64744494	64743935	64744142	64744844	64744930	5.19985e-10	0.397
MRPS10	SE	chr6	-	42181857	42181956	42179518	42179655	42182017	42182082	5.66296e-10	0.4
TRPT1	SE	chr11	-	63991571	63991685	63991270	63991439	63991756	63991905	5.77753e-10	0.332
MZB1	SE	chr5	-	138725015	138725109	138724149	138724274	138725368	138725605	8.59147e-10	-0.22
TRPT1	SE	chr11	-	63991571	63991634	63991270	63991439	63991756	63991963	1.09266e-09	0.349
ANAPC16	SE	chr10	+	73983645	73983814	73975757	73975896	73990123	73990198	1.09266e-09	0.28
AP1G2	SE	chr14	-	24032408	24032491	24031712	24031802	24032588	24032711	1.3815e-09	0.315
AEBP1	SE	chr7	+	44149613	44149723	44148886	44148940	44149805	44149945	2.01386e-09	0.2
GMFG	SE	chr19	-	39825900	39825950	39823716	39823766	39826074	39826171	2.3866e-09	0.106
LUC7L	SE	chr16	-	258599	258656	258076	258187	270647	270746	2.3866e-09	0.253
MZB1	SE	chr5	-	138725015	138725125	138724149	138724274	138725368	138725605	2.40685e-09	-0.167
DPP7	SE	chr9	-	140006324	140006481	140006141	140006206	140006563	140006682	2.5255e-09	0.265
DDX12P	SE	chr12	-	9590270	9590487	9589998	9590085	9590606	9590855	2.73077e-09	0.278
STX16	SE	chr20	+	57244346	57244509	57243042	57243183	57245567	57245659	2.90274e-09	0.304
LRRC75A-AS1	SE	chr17	+	16342973	16343017	16342640	16342728	16343498	16343567	3.15205e-09	-0.106
LRRC75A-AS1	SE	chr17	+	16342841	16343017	16342300	16342728	16343498	16343566	3.15588e-09	-0.119
PET100	SE	chr19	+	7696117	7696207	7695639	7695732	7696358	7696510	3.61199e-09	-0.119
PFDN1	SE	chr5	-	139680000	139680167	139661033	139661118	139682625	139682689	4.26463e-09	0.22
TRPT1	SE	chr11	-	63991571	63991596	63991270	63991439	63991756	63991963	5.67101e-09	0.508
TRPT1	SE	chr11	-	63991606	63991682	63991270	63991439	63991756	63991963	6.31879e-09	0.399
SNHG5	SE	chr6	-	86387512	86387617	86387141	86387210	86387671	86387750	1.24722e-08	0.111
SNHG5	SE	chr6	-	86387512	86387586	86387141	86387210	86387671	86387730	1.29146e-08	0.111
PTPRC	SE	chr1	+	198665840	198666038	198661475	198661502	198672426	198672501	1.44225e-08	-0.3
TRPT1	SE	chr11	-	63991571	63991605	63991270	63991439	63991756	63991963	1.89846e-08	0.454
RAD23A	SE	chr19	+	13059331	13059366	13059084	13059172	13059499	13059632	6.19837e-08	0.193
ATXN2L	SE	chr16	+	28843794	28843888	28843582	28843720	28844137	28844208	6.69371e-08	0.16
SAT1	SE	chrX	+	23802410	23802520	23801916	23802000	23803444	23803546	1.21769e-07	-0.312
GALNT2	SE	chr1	+	230397467	230397570	230390963	230391090	230398318	230398411	1.48077e-07	-0.101
DPP7	SE	chr9	-	140006392	140006481	140006141	140006206	140006563	140006682	1.72818e-07	0.323
DPP7	SE	chr9	-	140006327	140006481	140006141	140006206	140006563	140006682	1.8333e-07	0.342
HSD17B4	SE	chr5	+	118807330	118807395	118792009	118792063	118809602	118809710	1.83584e-07	-0.322
HNRNPD	SE	chr4	-	83292680	83292705	83280721	83280792	83294598	83295149	1.94089e-07	-0.223
IVNS1ABP	SE	chr1	-	185275616	185275757	185274646	185274775	185276145	185276271	1.94089e-07	-0.253
GPBP1	SE	chr5	+	56532939	56532999	56531792	56531859	56542126	56542311	1.99383e-07	-0.245
RAD23A	SE	chr19	+	13059327	13059366	13059084	13059172	13059499	13059627	2.88216e-07	0.172
LAS1L	SE	chrX	-	64744443	64744571	64743935	64744142	64744844	64744930	2.88699e-07	0.243
GPBP1	SE	chr5	+	56532918	56532999	56531792	56531859	56542126	56542311	4.60655e-07	-0.254
TNKS2	SE	chr10	+	93594386	93594494	93593609	93593781	93596675	93596755	6.20038e-07	-0.103
LEF1	SE	chr4	-	109002741	109002825	109000647	109000770	109004511	109004602	6.83425e-07	-0.125
STX16	SE	chr20	+	57244357	57244509	57243042	57243183	57245567	57245659	6.84851e-07	0.251
BCLAF1	SE	chr6	-	136588176	136588313	136582402	136582615	136589299	136589411	7.10746e-07	0.316
TNKS2	SE	chr10	+	93594386	93594560	93593609	93593781	93596675	93596755	8.45617e-07	-0.104
IVNS1ABP	SE	chr1	-	185275644	185275757	185274646	185274775	185276145	185276271	8.66198e-07	-0.224
ITGAE	SE	chr17	-	3626581	3626677	3623600	3623696	3626981	3627038	9.77911e-07	0.308
HNRNPD	SE	chr4	-	83277692	83277836	83276456	83276554	83277948	83278048	1.08009e-06	0.113
GMFG	SE	chr19	-	39825924	39825950	39823716	39823766	39826074	39826194	1.11682e-06	0.262
AP1G2	SE	chr14	-	24032393	24032491	24031712	24031802	24032588	24032711	1.46067e-06	0.252
PFDN5	SE	chr12	+	53690027	53690251	53689622	53689725	53691633	53691708	1.56236e-06	0.137
MBD1	SE	chr18	-	47799703	47799841	47799193	47799325	47799933	47800233	1.98809e-06	0.252
ACADVL	SE	chr17	+	7127464	7127542	7127286	7127388	7127639	7127712	2.07767e-06	0.125
ACADVL	SE	chr17	+	7127464	7127559	7127286	7127388	7127639	7127867	2.19759e-06	0.124
EXOC7	SE	chr17	-	74087223	74087316	74085255	74085401	74090494	74090662	2.59511e-06	-0.315
CARM1	SE	chr19	+	11032050	11032119	11031725	11031803	11032290	11033448	2.59511e-06	0.332
BCLAF1	SE	chr6	-	136588166	136588313	136582402	136582615	136589299	136589477	2.93863e-06	0.222
PSMA4	SE	chr15	+	78834917	78834987	78834518	78834561	78836531	78836609	3.80237e-06	0.153
AP1G2	SE	chr14	-	24032408	24032484	24031712	24031802	24032588	24032711	4.09971e-06	0.216
MBD1	SE	chr18	-	47799703	47799866	47799217	47799325	47799933	47800233	6.47698e-06	0.292
GMFG	SE	chr19	-	39825900	39825945	39823716	39823766	39826074	39826171	7.50053e-06	0.216
PTPRC	SE	chr1	+	198671515	198671659	198661475	198661502	198672426	198672501	7.76052e-06	-0.188
SNHG6	SE	chr8	-	67834558	67834649	67834164	67834349	67834848	67834960	7.84734e-06	0.116
ACIN1	SE	chr14	-	23559190	23559310	23550956	23551045	23559730	23559842	8.41326e-06	0.2
SUGP2	SE	chr19	-	19104456	19104549	19101696	19101958	19105174	19105295	8.70317e-06	-0.26
CPNE1	SE	chr20	-	34243123	34243266	34220716	34220845	34252681	34252859	9.92135e-06	-0.138
HNRNPD	SE	chr4	-	83277689	83277836	83276456	83276554	83277948	83278048	1.03634e-05	0.127
SUGP2	SE	chr19	-	19104446	19104549	19101696	19101958	19105174	19105295	1.09244e-05	-0.268
YWHAZ	SE	chr8	-	101964156	101964353	101960823	101961128	101965496	101965623	1.24724e-05	-0.17
MBD1	SE	chr18	-	47799703	47799796	47799217	47799325	47799933	47800233	1.24724e-05	0.278
RFXANK	SE	chr19	+	19307994	19308060	19307771	19307855	19308329	19308430	1.26062e-05	0.215
DPH7	SE	chr9	-	140470760	140470854	140470531	140470619	140471921	140472055	1.27045e-05	0.461
AP1G2	SE	chr14	-	24032408	24032511	24031712	24031802	24032588	24032711	1.40306e-05	0.213
YWHAZ	SE	chr8	-	101964156	101964356	101960823	101961128	101965496	101965623	1.42611e-05	-0.169
TPM2	SE	chr9	-	35684728	35684787	35684484	35684547	35685060	35685136	1.57354e-05	0.366
OGT	SE	chrX	+	70764416	70764485	70757678	70757922	70767756	70767873	1.57354e-05	-0.117
SNHG6	SE	chr8	-	67834558	67834620	67834164	67834349	67834848	67834960	1.57446e-05	0.114
DALRD3	SE	chr3	-	49054044	49054106	49053861	49053944	49054206	49054277	1.66443e-05	0.253
POLR1D	SE	chr13	+	28197011	28197247	28195915	28196146	28222515	28222586	1.86689e-05	0.148
SGSM3	SE	chr22	+	40797596	40797679	40796670	40796817	40798142	40798209	2.03981e-05	0.248
ACADVL	SE	chr17	+	7127471	7127562	7127286	7127388	7127639	7127712	2.11334e-05	0.142
RPAIN	SE	chr17	+	5329555	5329619	5329290	5329402	5335861	5336340	2.11334e-05	0.284
STX16	SE	chr20	+	57244346	57244544	57243042	57243183	57245567	57245659	2.22922e-05	0.206
DALRD3	SE	chr3	-	49054042	49054106	49053861	49053944	49054206	49054277	2.32648e-05	0.353
KIAA0226L	SE	chr13	-	46952024	46952140	46946700	46946732	46961268	46961635	2.89224e-05	-0.284
HIRA	SE	chr22	-	19395796	19395926	19394706	19394797	19396005	19396116	3.21252e-05	0.108
HIRA	SE	chr22	-	19395796	19395880	19394706	19394797	19396005	19396116	3.2606e-05	0.106
PTK2B	SE	chr8	+	27303310	27303436	27301722	27301788	27308265	27308412	3.7227e-05	0.286
FOXM1	SE	chr12	-	2974520	2974565	2973848	2973918	2975558	2975687	3.95617e-05	-0.257
FGFR1OP2	SE	chr12	+	27113447	27113561	27110533	27110676	27116274	27116388	4.07522e-05	-0.182
WSB1	SE	chr17	+	25634769	25634933	25633807	25633908	25636125	25636298	4.45999e-05	0.246
MBD1	SE	chr18	-	47799724	47799841	47799196	47799325	47799933	47800230	4.69715e-05	0.313
RFXANK	SE	chr19	+	19307994	19308145	19307827	19307855	19308329	19308430	5.99428e-05	0.194
PCBP2	SE	chr12	+	53859715	53859756	53858543	53858636	53861004	53861074	6.48422e-05	0.104
HMGN3	SE	chr6	-	79911772	79911872	79910961	79911443	79911992	79912106	6.58051e-05	0.101
GOLGA2	SE	chr9	-	131029472	131029538	131028565	131028604	131029736	131029796	6.58051e-05	0.195
SNHG6	SE	chr8	-	67834558	67834596	67834164	67834349	67834848	67834960	6.8108e-05	0.132
SDHAP3	SE	chr5	-	1579391	1579622	1576293	1576424	1585098	1585248	8.63123e-05	-0.516
HIRA	SE	chr22	-	19395796	19395930	19394706	19394797	19396005	19396116	9.61732e-05	0.106
RTKN2	SE	chr10	-	64022383	64022580	64005757	64005816	64028309	64028622	0.00011608	0.403
KAT2A	SE	chr17	-	40269924	40270035	40269695	40269832	40270314	40270421	0.000130908	0.153
AARSD1	SE	chr17	-	41105740	41105795	41103816	41103911	41106892	41106984	0.000144361	0.231
MRPL42	SE	chr12	+	93864261	93864366	93862967	93863131	93870729	93870793	0.000146169	-0.115
MAZ	SE	chr16	+	29820860	29821085	29819917	29820062	29821397	29821548	0.000147258	0.141
SFI1	SE	chr22	+	31946963	31947110	31946239	31946334	31952927	31953045	0.000147258	-0.153
TMEM219	SE	chr16	+	29983362	29983461	29982728	29982899	29984270	29984373	0.00014799	-0.111
RPAIN	SE	chr17	+	5329290	5329391	5326088	5326149	5335861	5336340	0.000151278	0.197
WSB1	SE	chr17	+	25634769	25634945	25633807	25633908	25636125	25636298	0.000182582	0.235
LPXN	SE	chr11	-	58331627	58331674	58322313	58322413	58338028	58338186	0.000200885	0.101
GPR137	SE	chr11	+	64055536	64055686	64055192	64055418	64055811	64055940	0.000203047	0.45
GAS5	SE	chr1	-	173833621	173833643	173833394	173833442	173833812	173833842	0.000205488	0.113
RHOT2	SE	chr16	+	718487	718569	718352	718411	718655	718699	0.000269017	0.155
SDHAP3	SE	chr5	-	1579391	1579599	1576293	1576424	1585098	1585248	0.00027086	-0.454
GAS5	SE	chr1	-	173833621	173833640	173833394	173833442	173833812	173833842	0.000281479	0.125
PTGES3	SE	chr12	-	57059987	57060050	57058559	57058584	57065532	57065631	0.00031417	-0.11
RHOT2	SE	chr16	+	718508	718569	718357	718411	718655	718699	0.000332221	0.241
SAFB2	SE	chr19	-	5610299	5610385	5610015	5610106	5610649	5610699	0.000332221	0.107
CD47	SE	chr3	-	107769424	107769449	107761940	107766139	107770785	107770817	0.000362096	-0.176
SGSM3	SE	chr22	+	40797596	40797648	40796670	40796817	40798142	40798209	0.000364466	0.257
STAG3L5P-PVRIG2P-PILRB	SE	chr7	+	99951504	99951635	99950995	99951106	99952765	99952863	0.000364466	-0.181
STXBP2	SE	chr19	+	7708050	7708127	7707868	7707934	7709499	7709607	0.000470763	0.175
WRAP73	SE	chr1	-	3551723	3551858	3551560	3551638	3552507	3552594	0.000472138	0.206
STAG3L5P-PVRIG2P-PILRB	SE	chr7	+	99951517	99951635	99950995	99951106	99952765	99952863	0.000526404	-0.168
CD1E	SE	chr1	+	158324166	158324463	158323485	158323836	158325616	158325730	0.000563269	0.164
TMEM18	SE	chr2	-	676091	676238	675509	675630	677288	677439	0.000604245	-0.145
MSANTD3	SE	chr9	+	103206409	103206488	103204187	103204638	103212838	103214016	0.000652082	-0.199
TRPT1	SE	chr11	-	63991606	63991685	63991270	63991439	63991756	63991905	0.000657005	0.779
SAFB2	SE	chr19	-	5610299	5610432	5610015	5610106	5610649	5610699	0.00066056	0.101
CHCHD7	SE	chr8	+	57125320	57125448	57124314	57124396	57127156	57127226	0.00066962	-0.236
SIN3B	SE	chr19	+	16973694	16973790	16973162	16973370	16974490	16974607	0.000694634	-0.376
STAG3L5P-PVRIG2P-PILRB	SE	chr7	+	99951593	99951635	99950995	99951106	99952765	99952863	0.000726339	-0.184
ABI1	SE	chr10	-	27048014	27048164	27040526	27040712	27054146	27054247	0.000793293	0.214
MSMO1	SE	chr4	+	166254491	166254777	166248817	166248916	166258940	166259089	0.000802863	0.312
TMEM18	SE	chr2	-	676162	676238	675509	675630	677288	677439	0.000802863	-0.142
BCLAF1	SE	chr6	-	136588166	136588302	136582402	136582615	136589299	136589411	0.00085143	0.255
ZNF714	SE	chr19	+	21280990	21281117	21264952	21265154	21299634	21299721	0.000919929	-0.111
IMPDH2	SE	chr3	-	49065686	49065755	49065142	49065349	49065863	49065965	0.000919929	0.113
ORMDL1	SE	chr2	-	190647735	190647849	190647260	190647328	190648994	190649097	0.000921022	-0.318
CPXM1	SE	chr20	-	2778613	2778704	2777837	2777988	2778797	2778937	0.000938892	0.172
PFDN5	SE	chr12	+	53690237	53690335	53689622	53689725	53691633	53691708	0.000939155	0.297
CNOT2	SE	chr12	+	70687850	70688074	70671911	70672054	70704674	70704797	0.00095123	-0.115
SUGP2	SE	chr19	-	19104456	19104608	19101696	19101958	19105174	19105295	0.000953073	-0.417
ANXA6	SE	chr5	-	150490187	150490205	150489313	150489407	150496687	150496741	0.000998543	0.127
ATP5F1	SE	chr1	+	111996864	111996978	111992458	111992495	111998707	111998871	0.000998543	0.106
IMPDH2	SE	chr3	-	49065631	49065755	49065142	49065349	49065863	49065965	0.0010359	0.114
PFDN5	SE	chr12	+	53689622	53689725	53689234	53689423	53691633	53691708	0.00103901	-0.12
POLG	SE	chr15	-	89861169	89861268	89860606	89860767	89861771	89861980	0.00112305	-0.161
ABI1	SE	chr10	-	27047990	27048164	27040526	27040712	27054146	27054247	0.00112753	0.275
ATP5F1	SE	chr1	+	111996842	111996978	111992458	111992495	111998707	111998871	0.00112753	0.105
GOLGA2	SE	chr9	-	131029472	131029553	131028560	131028604	131029736	131029796	0.0011722	0.221
POLG2	SE	chr17	-	62477362	62477563	62476405	62476506	62479035	62479116	0.00117586	-0.243
SAP30BP	SE	chr17	+	73701690	73701773	73700835	73700894	73702087	73702172	0.00123252	-0.12
RHPN1	SE	chr8	+	144458764	144458823	144457743	144457838	144459549	144459625	0.00138684	0.158
EIF6	SE	chr20	-	33868456	33868632	33867744	33867921	33871978	33872064	0.00139277	0.106
CMSS1	SE	chr3	+	99728974	99729024	99536677	99536887	99865816	99865905	0.00140198	0.105
COPS6	SE	chr7	+	99688503	99688572	99688214	99688277	99688660	99688775	0.00140402	0.107
PRPF39	SE	chr14	+	45579096	45579196	45578818	45578983	45579296	45579423	0.00144752	0.148
MSANTD3	SE	chr9	+	103206409	103206470	103204187	103204638	103212838	103214016	0.00147228	-0.203
MTA1	SE	chr14	+	105912003	105912189	105911754	105911848	105915695	105915746	0.00157014	-0.148
MTA1	SE	chr14	+	105912003	105912124	105911754	105911848	105915695	105915746	0.00157014	-0.148
MTA1	SE	chr14	+	105912003	105912112	105911754	105911848	105915695	105915746	0.0015769	-0.147
WRAP73	SE	chr1	-	3551723	3551808	3551560	3551638	3552507	3552594	0.00157936	0.304
RPAIN	SE	chr17	+	5329290	5329402	5326088	5326149	5335861	5336340	0.00161344	0.176
LOC100506844	SE	chr12	-	58329252	58329355	58325231	58325520	58329621	58329947	0.00163396	0.123
ARPP21	SE	chr3	+	35750460	35750562	35748465	35748574	35756930	35756968	0.00170567	0.221
HTRA2	SE	chr2	+	74759745	74759841	74758982	74759052	74759946	74760683	0.00179922	0.112
COPS5	SE	chr8	-	67974088	67974259	67971445	67971680	67974340	67974562	0.00180868	0.162
RHPN1	SE	chr8	+	144458587	144458823	144457636	144457838	144459549	144459625	0.0018149	0.155
LOC100506844	SE	chr12	-	58329177	58329336	58325231	58325520	58329621	58329947	0.00184219	0.143
RAD17	SE	chr5	+	68667860	68668044	68666861	68666998	68669656	68669914	0.00184219	0.297
VARS	SE	chr6	-	31751990	31752085	31750872	31750963	31752170	31752279	0.0020461	0.19
CENPV	SE	chr17	-	16252453	16252647	16251887	16251999	16253244	16253343	0.00211367	-0.154
CKLF	SE	chr16	+	66592092	66592251	66586465	66586696	66597024	66597120	0.00212483	0.144
CCDC14	SE	chr3	-	123674689	123674812	123667742	123667979	123674892	123674962	0.00213998	0.371
AP1G2	SE	chr14	-	24035770	24035895	24035486	24035628	24036319	24036528	0.0022335	0.19
ENTPD4	SE	chr8	-	23292154	23292194	23291829	23291991	23292904	23292990	0.00229676	0.184
CDC25B	SE	chr20	+	3781389	3781512	3781108	3781145	3781617	3781740	0.00231992	0.252
PDS5A	SE	chr4	-	39928394	39928481	39927455	39927553	39929580	39929784	0.00240135	-0.211
PTGES3	SE	chr12	-	57064058	57064134	57058559	57058584	57065532	57065631	0.00243587	-0.425
PTPRC	SE	chr1	+	198668692	198668833	198661475	198661502	198672426	198672500	0.00243587	-0.158
RWDD3	SE	chr1	+	95709766	95710254	95699710	95699871	95712097	95712213	0.00247354	0.477
PFDN5	SE	chr12	+	53690213	53690335	53689622	53689725	53691633	53691708	0.00268507	0.295
NUP54	SE	chr4	-	77045801	77045909	77039227	77039347	77051808	77051902	0.0027584	0.145
FGFR1OP2	SE	chr12	+	27113318	27113561	27110533	27110676	27116274	27116388	0.00278022	-0.111
MIF4GD	SE	chr17	-	73263826	73263982	73263618	73263711	73264163	73264273	0.00281755	0.214
SUGP2	SE	chr19	-	19104446	19104608	19101696	19101958	19105174	19105295	0.00282278	-0.429
SIN3B	SE	chr19	+	16973694	16973835	16973162	16973370	16974490	16974607	0.00287029	-0.404
CLK2	SE	chr1	-	155238498	155238583	155238083	155238150	155239278	155239507	0.00290003	0.332
WBP1	SE	chr2	+	74686564	74686689	74685526	74685798	74686769	74686872	0.00296408	0.172
USP16	SE	chr21	+	30418987	30419101	30415743	30415920	30419548	30419642	0.00310991	0.264
PTPRC	SE	chr1	+	198663146	198663269	198661475	198661502	198665840	198666038	0.00335804	0.197
NUP50	SE	chr22	+	45566868	45567058	45564048	45564127	45567480	45567564	0.00339184	0.127
BAK1	SE	chr6	-	33542282	33542302	33540322	33541684	33543074	33543218	0.00348908	0.57
CLK2	SE	chr1	-	155238498	155238586	155238083	155238150	155239278	155239504	0.00363751	0.303
FGFR1OP2	SE	chr12	+	27113447	27113590	27110533	27110676	27116274	27116388	0.00366925	-0.125
SOCS7	SE	chr17	+	36520634	36520739	36517593	36517658	36522169	36522300	0.00366925	0.305
MITD1	SE	chr2	-	99789876	99789965	99787972	99788109	99790377	99790479	0.00366925	-0.158
CDK10	SE	chr16	+	89759805	89759875	89759681	89759734	89760580	89760640	0.00373674	0.242
MDM4	SE	chr1	+	204506557	204506625	204501318	204501374	204507336	204507436	0.00376906	0.303
SETD2	SE	chr3	-	47122356	47122573	47108559	47108608	47125209	47125872	0.00379752	0.154
EIF6	SE	chr20	-	33868456	33868625	33867744	33867921	33871978	33872064	0.00379752	0.161
TMPO	SE	chr12	+	98938007	98938127	98931252	98931350	98938728	98938843	0.00388458	0.153
ARPP21	SE	chr3	+	35748942	35749033	35748465	35748574	35750460	35750562	0.00394391	-0.419
NUCB2	SE	chr11	+	17308180	17308260	17298285	17298375	17316870	17317014	0.00403926	0.48
EHMT2	SE	chr6	-	31861302	31861439	31860602	31860687	31864039	31864293	0.00406185	-0.324
TBC1D17	SE	chr19	+	50388428	50388491	50387915	50388015	50390732	50390830	0.00414836	-0.12
PTPRC	SE	chr1	+	198663146	198663390	198661475	198661502	198665840	198666038	0.00431247	0.162
DOK2	SE	chr8	-	21769411	21769499	21768183	21768368	21771049	21771205	0.00448482	-0.409
CENPV	SE	chr17	-	16252532	16252647	16251887	16251999	16253244	16253343	0.00450858	-0.147
CARM1	SE	chr19	+	11031971	11032119	11031725	11031803	11032290	11033448	0.00454702	0.219
SLC38A1	SE	chr12	-	46648596	46648719	46636982	46637097	46662647	46663208	0.00454702	-0.176
AP1G2	SE	chr14	-	24035024	24035101	24034814	24034910	24035272	24035369	0.0045903	0.16
MRPL42	SE	chr12	+	93864261	93864281	93862967	93863131	93870729	93870793	0.00462917	-0.113
HMGCS1	SE	chr5	-	43298110	43298236	43297103	43297268	43298619	43299077	0.00464053	-0.13
PTPRC	SE	chr1	+	198668709	198668833	198661475	198661502	198672426	198672500	0.00468264	-0.207
COX20	SE	chr1	+	245005245	245005360	244998638	244999058	245005496	245005560	0.00477114	0.263
PTPRC	SE	chr1	+	198668704	198668833	198661475	198661502	198672426	198672500	0.00477114	-0.207
SETD2	SE	chr3	-	47122405	47122573	47108559	47108608	47125209	47125872	0.00477114	0.176
BCHE	SE	chr3	-	165547304	165548829	165503932	165504099	165555101	165555253	0.00483476	0.365
EXOC7	SE	chr17	-	74087223	74087353	74085255	74085401	74090494	74090662	0.00484259	-0.28
PEX5	SE	chr12	+	7354836	7354947	7354346	7354437	7355207	7355300	0.0049504	0.236
ORMDL1	SE	chr2	-	190647739	190647849	190647260	190647328	190648994	190649097	0.00498989	-0.239
TMEM126B	SE	chr11	+	85340175	85340306	85339616	85339732	85342730	85342852	0.00501621	-0.189
DESI2	SE	chr1	+	244852550	244852644	244849898	244849971	244855180	244855322	0.00505267	0.218
CRBN	SE	chr3	-	3214189	3214330	3209317	3209477	3214459	3214609	0.00517092	-0.121
CLK3	SE	chr15	+	74914460	74914557	74912349	74912566	74914834	74914901	0.00519462	0.122
ZFAS1	SE	chr20	+	47897439	47897501	47897021	47897107	47905581	47905795	0.0054991	-0.105
FAM193B	SE	chr5	-	176958953	176959201	176958282	176958522	176959443	176959642	0.005569	0.354
HDAC7	SE	chr12	-	48189688	48189799	48189369	48189550	48189989	48190081	0.005569	0.301
PFDN5	SE	chr12	+	53689622	53689732	53689234	53689423	53691633	53691708	0.00564186	-0.111
ABI1	SE	chr10	-	27047990	27048167	27040526	27040712	27054146	27054247	0.00572536	0.252
SREK1	SE	chr5	+	65451892	65452030	65449262	65449424	65454636	65454760	0.00575345	-0.415
BAK1	SE	chr6	-	33541810	33541991	33540322	33541684	33543074	33543218	0.00578165	0.286
FBXO18	SE	chr10	+	5966713	5966764	5966273	5966471	5967329	5967455	0.00584491	0.123
CDCA3	SE	chr12	-	6958486	6958593	6957971	6958362	6958728	6959022	0.00613005	0.25
NGLY1	SE	chr3	-	25761504	25761682	25760434	25761126	25770623	25770809	0.00630442	0.18
AGBL2	SE	chr11	-	47727415	47727469	47726127	47726280	47731928	47732063	0.00650268	0.249
WBP1	SE	chr2	+	74686604	74686689	74685526	74685798	74686769	74686872	0.00657901	0.162
BAK1	SE	chr6	-	33541810	33541887	33540322	33541684	33543074	33543218	0.00663477	0.356
FMNL3	SE	chr12	-	50052224	50052377	50050864	50050973	50055748	50055832	0.00709129	0.189
BRD8	SE	chr5	-	137504158	137504377	137503622	137503767	137504910	137505047	0.00722199	-0.144
PRMT1	SE	chr19	+	50183451	50183495	50183128	50183182	50183743	50183845	0.00732972	-0.225
RNASEK-C17orf49	SE	chr17	+	6919954	6920004	6919813	6919844	6920228	6920333	0.00732974	0.175
RHPN1	SE	chr8	+	144461998	144462155	144461484	144461678	144462234	144462345	0.00738198	0.526
UBE2D2	SE	chr5	+	138994445	138994557	138994281	138994359	139002952	139003046	0.0075611	0.116
ENO3	SE	chr17	+	4856345	4856404	4856089	4856185	4856566	4856636	0.00793275	0.145
RNF216	SE	chr7	-	5779084	5779256	5778906	5778983	5780603	5781446	0.00793451	-0.325
SAP30BP	SE	chr17	+	73701690	73701771	73700835	73700894	73702087	73702172	0.00806236	-0.103
TCERG1	SE	chr5	+	145841580	145841659	145838446	145838900	145843113	145843356	0.00819201	-0.137
VARS	SE	chr6	-	31751990	31752081	31750872	31750963	31752170	31752279	0.00819499	0.287
CD1E	SE	chr1	+	158325089	158325359	158323485	158323836	158325616	158325791	0.00845787	0.136
CHI3L2	SE	chr1	+	111772473	111772503	111770280	111770391	111773363	111773565	0.00864375	0.185
ANKHD1	SE	chr5	+	139876104	139876863	139866542	139866645	139884405	139884551	0.0089746	0.196
EPB41L2	SE	chr6	-	131199243	131199390	131191178	131191266	131206235	131206408	0.00917526	-0.115
RPS6KB2	SE	chr11	+	67200596	67200665	67200422	67200513	67200810	67200918	0.0092199	0.157
CLK2	SE	chr1	-	155238498	155238578	155238083	155238150	155239278	155239507	0.00950233	0.316
GOLGA4	SE	chr3	+	37330725	37330782	37323448	37323763	37336469	37336568	0.00951752	-0.279
HIRIP3	SE	chr16	-	30005226	30006164	30004960	30005129	30006423	30006538	0.00954858	0.216
CLK1	SE	chr2	-	201724847	201724938	201724402	201724469	201725960	201726189	0.00954858	0.172
LRIF1	SE	chr1	-	111493909	111495437	111492472	111492745	111506242	111506566	0.00975149	0.174
RHOT2	SE	chr16	+	720715	720773	720455	720557	720888	721000	0.00999961	0.317
CTC1	SE	chr17	-	8132044	8132210	8131820	8131947	8132619	8132764	0.0101239	0.416
ITGAE	SE	chr17	-	3626581	3626634	3623600	3623696	3626981	3627038	0.0103161	0.216
DALRD3	SE	chr3	-	49054090	49054106	49053861	49053944	49054206	49054249	0.010437	0.581
RHOT2	SE	chr16	+	720723	720773	720455	720557	720888	721000	0.010437	0.409
NUCB2	SE	chr11	+	17308180	17308264	17298285	17298375	17316870	17317014	0.0106015	0.281
CD1E	SE	chr1	+	158325317	158325359	158323485	158323836	158325616	158325730	0.010619	0.145
FAM193B	SE	chr5	-	176958953	176959132	176958282	176958522	176959443	176959642	0.0106423	0.359
KCNAB2	SE	chr1	+	6101890	6101932	6100576	6100705	6132814	6132858	0.0106644	-0.138
PFDN5	SE	chr12	+	53689622	53689675	53689234	53689423	53691633	53691708	0.0106644	-0.112
SNRPA1	SE	chr15	-	101826418	101826498	101825930	101826006	101827112	101827215	0.0108919	0.104
POLG	SE	chr15	-	89861169	89861288	89860606	89860767	89861771	89861980	0.0109715	-0.12
TMPO	SE	chr12	+	98938219	98938315	98931252	98931350	98938728	98938839	0.0109715	0.137
BIRC3	SE	chr11	+	102192567	102196093	102188180	102188302	102196196	102196296	0.0111917	0.101
ZFAS1	SE	chr20	+	47897400	47897501	47897021	47897107	47905581	47905795	0.0112774	-0.1
TMPO	SE	chr12	+	98938007	98938125	98931252	98931350	98938219	98938315	0.0116795	0.147
ANAPC16	SE	chr10	+	73983645	73983814	73979811	73980137	73990123	73990198	0.0117764	0.102
UBR5	SE	chr8	-	103314498	103314709	103312227	103312379	103316270	103316397	0.0117764	-0.156
PRPF38B	SE	chr1	+	109240431	109240639	109238898	109238959	109241225	109241449	0.0122654	0.111
CD164	SE	chr6	-	109691613	109691690	109687716	109690220	109697276	109697315	0.0124691	0.143
PDCD6	SE	chr5	+	306716	306869	304291	304336	311407	311517	0.0125631	-0.226
CNOT2	SE	chr12	+	70726546	70726626	70713077	70713144	70729217	70729343	0.0126588	-0.225
LARP1	SE	chr5	+	154173359	154173461	154173187	154173283	154173659	154173828	0.0126588	0.148
RHOT2	SE	chr16	+	718487	718541	718352	718411	718655	718699	0.0127296	0.291
RPAIN	SE	chr17	+	5329555	5329619	5326088	5326149	5335861	5336340	0.012807	0.116
GRIPAP1	SE	chrX	-	48838206	48838284	48838007	48838103	48839390	48839504	0.0130828	0.145
RPS6KB2	SE	chr11	+	67200596	67200687	67200422	67200513	67200810	67200918	0.0138552	0.106
MYO9B	SE	chr19	+	17321141	17321189	17320394	17320518	17321523	17321657	0.0140948	-0.217
PIP5K1A	SE	chr1	+	151214603	151214745	151212430	151212515	151214913	151215047	0.0143743	0.149
ZNF714	SE	chr19	+	21266783	21266875	21264952	21265154	21280990	21281117	0.0144726	0.265
PPHLN1	SE	chr12	+	42745686	42745855	42729684	42729776	42748962	42749024	0.0145488	0.234
APEH	SE	chr3	+	49713819	49713948	49713488	49713652	49714041	49714129	0.0149903	0.135
TRNAU1AP	SE	chr1	+	28887624	28887772	28887144	28887244	28887857	28887910	0.01533	0.141
SDCCAG8	SE	chr1	+	243456700	243456796	243456423	243456521	243468014	243468079	0.0154407	-0.302
LARP1	SE	chr5	+	154173359	154173482	154173154	154173283	154173659	154173822	0.0159897	0.157
PCBP1-AS1	SE	chr2	-	70286774	70286812	70278334	70278437	70310638	70310819	0.0160373	0.564
BTBD10	SE	chr11	-	13466570	13466728	13443188	13443385	13484638	13484844	0.0162739	-0.229
TPR	SE	chr1	-	186325778	186325871	186325417	186325581	186326528	186326755	0.0167382	-0.102
RPAIN	SE	chr17	+	5329555	5329619	5329290	5329402	5331390	5332985	0.0167561	0.135
CDCA3	SE	chr12	-	6958486	6958522	6957971	6958362	6958728	6958828	0.0167788	0.326
LARP1	SE	chr5	+	154173359	154173470	154173154	154173283	154173659	154173822	0.0176603	0.16
ZMIZ2	SE	chr7	+	44805565	44805655	44804933	44805178	44805762	44805932	0.0182928	0.367
DNM1L	SE	chr12	+	32891197	32891230	32890038	32890095	32892997	32893171	0.0183306	0.231
RWDD3	SE	chr1	+	95709766	95710271	95699710	95699871	95712097	95712213	0.0183306	0.528
PIP5K1A	SE	chr1	+	151214655	151214745	151212430	151212515	151214913	151215047	0.0183306	0.147
EMC8	SE	chr16	-	85813984	85814079	85812230	85813473	85814816	85814876	0.0185544	0.143
UBE2D2	SE	chr5	+	138994445	138994561	138994281	138994359	139002952	139003046	0.0186207	0.114
LARP1	SE	chr5	+	154173359	154173560	154173154	154173283	154173659	154173822	0.0188422	0.105
HIRIP3	SE	chr16	-	30006067	30006164	30004960	30005129	30006423	30006538	0.019125	0.245
PRRC2A	SE	chr6	+	31604509	31604727	31604286	31604385	31604818	31604913	0.0192288	0.156
TSC22D1	SE	chr13	-	45010639	45010881	45010179	45010231	45011311	45011390	0.0195781	0.122
HIRIP3	SE	chr16	-	30005987	30006164	30004960	30005129	30006423	30006538	0.0195979	0.244
TSC22D1	SE	chr13	-	45010639	45010785	45010179	45010231	45011311	45011390	0.0197492	0.122
MMS19	SE	chr10	-	99219118	99219283	99218979	99219039	99219415	99219498	0.0197766	0.11
NUF2	SE	chr1	+	163315457	163315608	163313556	163313660	163317552	163317728	0.020166	0.1
RBM23	SE	chr14	-	23374814	23374868	23374544	23374662	23375403	23375577	0.0201752	0.154
FNBP4	SE	chr11	-	47753668	47753771	47752925	47753113	47754088	47754222	0.0208714	0.196
TSC22D1	SE	chr13	-	45010639	45010744	45010179	45010231	45011311	45011390	0.0208714	0.121
VPS13C	SE	chr15	-	62210916	62210983	62210334	62210456	62211487	62211648	0.0208714	-0.155
MTERF4	SE	chr2	-	242034544	242035853	242033691	242033847	242036657	242036842	0.0219735	0.335
HIRA	SE	chr22	-	19392985	19393054	19385527	19385610	19393308	19393403	0.0225114	0.116
MELK	SE	chr9	+	36597218	36597291	36589532	36589649	36599390	36599483	0.0227932	-0.442
EML2	SE	chr19	-	46119718	46119816	46119059	46119147	46120022	46120111	0.023422	0.147
MIF4GD	SE	chr17	-	73263826	73263978	73263618	73263711	73264163	73264273	0.0236624	0.358
RAB1A	SE	chr2	-	65318116	65318212	65313987	65315824	65325104	65325200	0.0240736	-0.102
IFFO1	SE	chr12	-	6658641	6658650	6657833	6657991	6658921	6659062	0.0240915	-0.42
ANP32B	SE	chr9	+	100769915	100769984	100760837	100760960	100773552	100773671	0.0240915	-0.179
PPP1R35	SE	chr7	-	100033253	100033390	100032911	100033156	100033470	100033687	0.0245009	0.236
FASTK	SE	chr7	-	150773999	150774114	150773707	150773919	150774187	150774323	0.0245435	0.203
DDX42	SE	chr17	+	61876839	61876985	61875381	61875459	61877827	61877977	0.0245435	0.147
SAFB2	SE	chr19	-	5611130	5611641	5610649	5610699	5612550	5612578	0.0245435	-0.207
COASY	SE	chr17	+	40716979	40717065	40716490	40716595	40717244	40717329	0.0246983	0.151
CENPE	SE	chr4	-	104074203	104074407	104072375	104072534	104079456	104079615	0.0254927	0.27
FOXN3	SE	chr14	-	89656730	89656793	89647044	89647150	89747293	89747358	0.0255868	0.199
ABI1	SE	chr10	-	27048014	27048167	27040526	27040712	27054146	27054247	0.025623	0.22
ZC3H13	SE	chr13	-	46550316	46550400	46549417	46549973	46553947	46554139	0.0256466	-0.134
KDM4C	SE	chr9	+	6981841	6982765	6980924	6981118	6984165	6984404	0.0258026	-0.272
RPAIN	SE	chr17	+	5331390	5331531	5326088	5326149	5335861	5336340	0.0262468	0.151
CEP57	SE	chr11	+	95555662	95555740	95555034	95555142	95560949	95561191	0.0264025	0.17
QTRT1	SE	chr19	+	10818175	10818291	10817977	10818056	10822836	10822975	0.0267186	0.163
PPM1M	SE	chr3	+	52280989	52281244	52280710	52280828	52281697	52281810	0.026823	0.269
PPHLN1	SE	chr12	+	42745686	42745851	42729684	42729776	42748962	42749024	0.026823	0.162
DCAF8	SE	chr1	-	160231074	160231148	160213749	160213824	160231906	160232318	0.0268885	-0.171
BRD9	SE	chr5	-	883465	883565	881221	881297	884052	884185	0.0268885	-0.176
ANKRD17	SE	chr4	-	73966825	73966890	73963789	73964237	73968092	73968264	0.0271332	-0.129
MMS19	SE	chr10	-	99219118	99219262	99218979	99219039	99219415	99219498	0.02741	0.192
ECHDC1	SE	chr6	-	127652974	127653012	127651953	127652175	127664480	127664754	0.0275128	-0.134
NISCH	SE	chr3	+	52514894	52515053	52514199	52514311	52518528	52518653	0.0276641	-0.281
DHX34	SE	chr19	+	47880171	47880246	47879699	47879817	47880356	47880463	0.0277653	0.586
NSMCE4A	SE	chr10	-	123719015	123719110	123718838	123718925	123719872	123719921	0.0279696	0.114
MMS19	SE	chr10	-	99219118	99219232	99218979	99219039	99219415	99219498	0.0291077	0.191
SPAG5	SE	chr17	-	26912551	26912671	26912336	26912429	26912881	26913003	0.0296356	0.113
KDM4A	SE	chr1	+	44119333	44119470	44118807	44118984	44121261	44121437	0.0296356	-0.137
HIPK3	SE	chr11	+	33369711	33369774	33369397	33369559	33370067	33370364	0.0311913	-0.313
KIAA1191	SE	chr5	-	175786483	175786570	175782573	175782752	175786813	175786921	0.0319373	0.241
NUP50	SE	chr22	+	45566868	45567033	45564048	45564127	45567480	45567564	0.0321309	0.1
STX16-NPEPL1	SE	chr20	+	57266089	57266283	57248686	57248767	57266460	57266618	0.0321309	0.332
PCBP2	SE	chr12	+	53859715	53859756	53856264	53856351	53861004	53861074	0.0321309	0.139
C20orf24	SE	chr20	+	35236292	35236403	35236117	35236221	35240412	35240960	0.0323412	0.452
CHD8	SE	chr14	-	21898959	21899135	21897122	21897494	21899969	21900017	0.0327051	0.401
RASGRP2	SE	chr11	-	64507839	64507921	64507484	64507635	64508419	64508551	0.0337038	0.116
COASY	SE	chr17	+	40717000	40717065	40716490	40716595	40717244	40717329	0.0339036	0.141
SHARPIN	SE	chr8	-	145153983	145154108	145153768	145153897	145154179	145154333	0.0340021	0.217
ZNF195	SE	chr11	-	3381949	3382018	3379156	3381795	3382972	3383119	0.0346574	0.254
CD1D	SE	chr1	+	158153725	158153825	158151821	158152100	158153918	158156216	0.0348717	0.108
PRC1	SE	chr15	-	91524728	91524891	91524113	91524263	91524977	91525211	0.0349547	0.122
ANO9	SE	chr11	-	430268	430403	430082	430179	431693	431771	0.0354866	0.463
ZBED3-AS1	SE	chr5	+	76396060	76396216	76394479	76394572	76414144	76414346	0.0355532	-0.166
MCM3	SE	chr6	-	52148091	52148200	52147450	52147659	52149394	52149679	0.035894	0.104
MIB2	SE	chr1	+	1560338	1560565	1560174	1560281	1560665	1560808	0.035894	0.502
MTHFD1	SE	chr14	+	64894369	64894479	64894054	64894191	64896901	64896948	0.035894	-0.113
PRC1	SE	chr15	-	91524728	91524926	91524113	91524263	91524977	91525211	0.0366394	0.121
MTA1	SE	chr14	+	105912003	105912074	105911754	105911848	105916394	105916521	0.0366394	-0.266
BRD9	SE	chr5	-	883446	883565	881221	881297	884052	884185	0.0366394	-0.174
GNB2L1	SE	chr5	-	180665098	180665184	180663927	180664042	180666066	180666177	0.0366767	-0.278
MAPKAPK2	SE	chr1	+	206905382	206905429	206905150	206905264	206905919	206907630	0.0366767	-0.108
TBC1D17	SE	chr19	+	50386229	50386333	50386020	50386149	50386907	50387002	0.0367244	0.211
ATP6V0B	SE	chr1	+	44441471	44441520	44440319	44440779	44441761	44441828	0.0376667	0.102
SPTAN1	SE	chr9	+	131355261	131355321	131353755	131353904	131356453	131356652	0.0377025	-0.156
C8orf59	SE	chr8	-	86131464	86131592	86129499	86129731	86132534	86132651	0.037811	0.138
EMC8	SE	chr16	-	85813984	85814075	85812230	85813473	85814816	85814876	0.0383475	0.2
CD1D	SE	chr1	+	158153680	158153825	158151821	158152100	158153918	158156216	0.0383475	0.116
BRD9	SE	chr5	-	883469	883565	881221	881297	884052	884185	0.0385935	-0.172
ZNF207	SE	chr17	+	30693683	30693776	30692348	30692506	30694790	30695033	0.0386885	0.11
FAM86EP	SE	chr4	-	3949816	3949947	3943486	3945099	3954837	3954900	0.0386885	0.111
DCAF8	SE	chr1	-	160231074	160231140	160213749	160213824	160231906	160232318	0.038783	-0.205
NPRL2	SE	chr3	-	50385554	50385672	50385189	50385332	50385747	50385868	0.0387999	0.128
PRDM8	SE	chr4	+	81115266	81115393	81112625	81112723	81117166	81117278	0.0388964	-0.167
ABI2	SE	chr2	+	204276007	204276094	204267298	204267457	204281630	204281804	0.0389376	0.216
RAD51AP1	SE	chr12	+	4654947	4654998	4652928	4653070	4655474	4655584	0.0390746	-0.305
DCAF16	SE	chr4	-	17811159	17811315	17806729	17806848	17812069	17812381	0.0391514	-0.373
SEPT2	SE	chr2	+	242256913	242257014	242255275	242255397	242263630	242263656	0.0391514	-0.149
SNHG5	SE	chr6	-	86387671	86387730	86387141	86387210	86387853	86387906	0.0391514	-0.197
HPS1	SE	chr10	-	100195028	100195171	100193696	100193848	100195391	100195529	0.039301	0.179
RWDD3	SE	chr1	+	95709766	95710207	95699710	95699871	95712097	95712213	0.0395647	0.484
HERC2P2	SE	chr15	-	23349894	23350054	23335487	23335658	23356105	23356220	0.0395647	0.166
PTPN22	SE	chr1	-	114397092	114397198	114381165	114381242	114397528	114397671	0.039735	-0.167
TCF25	SE	chr16	+	89971349	89971494	89970525	89970613	89972601	89972692	0.0399238	-0.139
NEIL3	SE	chr4	+	178262629	178262796	178257261	178257475	178265727	178265858	0.040236	-0.167
CD1D	SE	chr1	+	158153720	158153825	158151821	158152100	158153918	158156216	0.040236	0.114
DNAJC5	SE	chr20	+	62562461	62562535	62562203	62562375	62562817	62567384	0.0403549	0.154
CHD1L	SE	chr1	+	146743831	146743942	146740440	146740537	146747016	146747131	0.0403549	0.144
PRPF38B	SE	chr1	+	109240568	109240639	109238898	109238959	109241225	109241449	0.040603	0.102
TARBP1	SE	chr1	-	234529107	234529222	234528161	234528298	234529391	234529583	0.0411325	0.12
MORN1	SE	chr1	-	2321363	2321435	2319677	2319776	2322896	2323190	0.0411325	0.111
CHD8	SE	chr14	-	21898959	21899162	21897122	21897494	21899969	21900014	0.0411325	0.393
FLOT2	SE	chr17	-	27211242	27211333	27210125	27210249	27212874	27212965	0.0413367	0.211
AMMECR1L	SE	chr2	-	128630559	128630651	128628822	128628933	128631401	128631846	0.0414425	-0.242
HINFP	SE	chr11	+	118994277	118994394	118992232	118992349	118997644	118997703	0.0414425	-0.272
IKZF1	SE	chr7	+	50455042	50455168	50450237	50450405	50459426	50459561	0.0416845	0.121
TMEM161B-AS1	SE	chr5	+	87578573	87578683	87577858	87577923	87583252	87583439	0.0418826	0.176
PRUNE	SE	chr1	+	150997086	150997271	150980866	150981147	150999708	150999803	0.0420874	-0.167
RPGR	SE	chrX	-	38146346	38146498	38135839	38136025	38150211	38150277	0.0420874	0.332
C12orf73	SE	chr12	-	104347191	104347312	104343980	104345408	104350408	104350526	0.0424273	-0.14
TSPAN14	SE	chr10	+	82228302	82228443	82214037	82214127	82248972	82249070	0.0426564	0.415
C2orf48	SE	chr2	+	10338717	10338820	10282381	10282502	10350436	10351856	0.0427289	0.333
MTMR1	SE	chrX	+	149903935	149904099	149901013	149901202	149905066	149905252	0.0429468	-0.156
VRK3	SE	chr19	-	50500760	50500827	50498447	50498532	50504046	50504111	0.0430476	0.195
BTBD10	SE	chr11	-	13466570	13466700	13443188	13443385	13484638	13484844	0.0431736	-0.157
LZTFL1	SE	chr3	-	45868847	45868951	45864809	45867824	45869930	45870107	0.0433257	0.184
CCDC15	SE	chr11	+	124857934	124858030	124857022	124857143	124862475	124862583	0.0434083	-0.1
TYK2	SE	chr19	-	10471637	10471749	10468678	10468814	10472186	10472274	0.0437992	0.19
TMEM120A	SE	chr7	-	75616855	75616920	75616677	75616746	75617035	75617117	0.0438941	0.108
GTF2IP20	SE	chr1	-	224140369	224140572	224138967	224139993	224142178	224142369	0.04395	-0.118
ETHE1	SE	chr19	-	44015550	44015718	44012926	44013016	44030666	44030811	0.0439918	0.127
RNF123	SE	chr3	+	49736187	49736255	49735762	49735959	49736412	49736462	0.0445515	0.175
SURF2	SE	chr9	+	136226825	136227005	136224586	136224690	136227140	136227310	0.0446396	0.118
CHTOP	SE	chr1	+	153614718	153614905	153610770	153610924	153617539	153618782	0.0449034	-0.125
PTPRC	SE	chr1	+	198665840	198666038	198661475	198661502	198668692	198668833	0.0450322	-0.144
ELK1	SE	chrX	-	47509319	47509425	47500630	47500874	47509821	47510003	0.0450322	0.273
MUTYH	SE	chr1	-	45803857	45803976	45800062	45800183	45804178	45804328	0.0453424	0.166
HDAC10	SE	chr22	-	50687756	50687945	50686653	50686721	50688063	50688148	0.045409	-0.285
MIB2	SE	chr1	+	1560370	1560565	1560174	1560281	1560665	1560808	0.0457956	0.278
MTA1	SE	chr14	+	105912003	105912112	105911754	105911848	105916394	105916521	0.0457956	-0.256
BRD8	SE	chr5	-	137504144	137504377	137503622	137503767	137504910	137505047	0.0457956	-0.186
TFDP2	SE	chr3	-	141719093	141719196	141712379	141712427	141724282	141724314	0.0459789	0.417
MIB2	SE	chr1	+	1560344	1560565	1560174	1560281	1560665	1560808	0.0460039	0.477
SNX17	SE	chr2	+	27595489	27595564	27594135	27594210	27596113	27596178	0.0460039	0.213
LZTFL1	SE	chr3	-	45868847	45868954	45864809	45867824	45869930	45870107	0.0469007	0.279
RPL17	SE	chr18	-	47018105	47018203	47017901	47017954	47018627	47018834	0.0469007	0.241
MAP4K2	SE	chr11	-	64568371	64568503	64568235	64568298	64568582	64568655	0.0469007	0.252
CHCHD7	SE	chr8	+	57125320	57125468	57124314	57124396	57127156	57127226	0.0469007	-0.183
U2AF1L4	SE	chr19	-	36235526	36235593	36235223	36235322	36236025	36236088	0.0469582	0.383
SNRPA1	SE	chr15	-	101826418	101826602	101825930	101826006	101827112	101827215	0.0471446	0.197
SEPT1	SE	chr16	-	30390755	30390854	30390338	30390575	30391252	30391354	0.0474053	0.405
NSD1	SE	chr5	+	176674924	176675080	176673678	176673797	176675181	176675325	0.0474053	0.139
TCF19	SE	chr6	+	31126673	31126812	31126302	31126499	31126919	31127484	0.0483735	0.145
ZCCHC17	SE	chr1	+	31791013	31791083	31782890	31783011	31791955	31792013	0.0483904	0.125
POLA2	SE	chr11	+	65047202	65047258	65047008	65047097	65048462	65048618	0.0485364	0.213
TARBP1	SE	chr1	-	234529096	234529232	234528161	234528298	234529391	234529583	0.0487301	0.11
CHEK2	SE	chr22	-	29099492	29099554	29095825	29095925	29105993	29106047	0.0487301	0.251
UBR5	SE	chr8	-	103314498	103314606	103312227	103312379	103316270	103316397	0.0487301	-0.106
CLNS1A	SE	chr11	-	77336763	77336860	77336007	77336115	77340807	77340944	0.0488411	-0.222
GTSF1	SE	chr12	-	54858850	54858951	54856954	54857081	54865016	54865061	0.049473	0.173
MELK	SE	chr9	+	36597218	36597287	36589532	36589649	36599390	36599483	0.049473	-0.137
HERC4	SE	chr10	-	69749967	69750066	69726439	69726559	69750660	69750772	0.0495953	0.3
CCNT2-AS1	SE	chr2	-	135635089	135635213	135626513	135626611	135676132	135676176	0.0495953	0.499
KIF23	SE	chr15	+	69733106	69733418	69732646	69732826	69737128	69737380	0.0495953	0.245
HNRNPA1	SE	chr12	+	54675578	54675729	54674487	54674606	54675873	54676080	0.0495953	0.321
MITD1	SE	chr2	-	99787805	99787892	99786999	99787115	99787972	99788109	0.0495953	0.174
DCAF8	SE	chr1	-	160231074	160231190	160213749	160213824	160231906	160232318	0.0497323	-0.194
LZTFL1	SE	chr3	-	45868847	45868979	45864809	45867824	45869930	45870107	0.0497323	0.278
SHARPIN	SE	chr8	-	145153983	145154102	145153768	145153897	145154179	145154333	0.0497323	0.246
SEPT2	SE	chr2	+	242256913	242257009	242255275	242255397	242263630	242263656	0.0497689	-0.161
geneSymbol	Type	chr	strand	longExonStart_0base	longExonEnd	shortES	shortEE	flankingES	flankingEE	FDR	IncLevelDifference
PIH1D1	A3SS	chr19	-	49954038	49954196	49954038	49954105	49954741	49955115	0	-0.354
HNRNPK	A3SS	chr9	-	86582997	86584355	86582997	86584295	86585076	86585246	5.03978e-05	-0.157
ECI2	A3SS	chr6	-	4133782	4133960	4133782	4133935	4135744	4135831	0.000102542	0.182
ACADVL	A3SS	chr17	+	7127960	7128202	7128033	7128202	7127802	7127871	0.000102542	0.168
TRIP12	A3SS	chr2	-	230670445	230670599	230670445	230670518	230672423	230672539	0.000122309	-0.221
ECI2	A3SS	chr6	-	4133782	4133945	4133782	4133935	4135744	4135831	0.000122309	0.194
DAP3	A3SS	chr1	+	155698832	155699010	155698998	155699010	155697398	155697529	0.000209181	0.132
ZBTB8OS	A3SS	chr1	-	33099551	33099711	33099551	33099673	33100368	33100393	0.00333022	-0.283
RASAL3	A3SS	chr19	-	15562855	15563052	15562855	15562919	15563468	15563626	0.0037231	-0.297
MZB1	A3SS	chr5	-	138724149	138724356	138724149	138724274	138725368	138725605	0.0037231	-0.184
UBE2M	A3SS	chr19	-	59068429	59068598	59068429	59068524	59069639	59070343	0.0037231	0.19
RASAL3	A3SS	chr19	-	15562855	15563061	15562855	15562919	15563468	15563626	0.00447184	-0.291
HNRNPDL	A3SS	chr4	-	83346718	83346947	83346718	83346820	83347189	83347282	0.00860537	0.182
TFDP2	A3SS	chr3	-	141692889	141693036	141692889	141693033	141697361	141697524	0.010161	-0.132
SUGP2	A3SS	chr19	-	19104446	19104608	19104446	19104549	19105174	19105295	0.0111631	0.122
CHKB-CPT1B	A3SS	chr22	-	51019848	51020037	51019848	51019982	51020177	51020291	0.0133946	-0.226
N4BP2L2	A3SS	chr13	-	33095509	33095627	33095509	33095586	33096318	33096407	0.014629	-0.114
USP16	A3SS	chr21	+	30418987	30419642	30419548	30419642	30415782	30415920	0.0162057	0.267
IPO4	A3SS	chr14	-	24656280	24656428	24656280	24656356	24656605	24656785	0.0242442	-0.137
PNKP	A3SS	chr19	-	50369655	50369785	50369655	50369702	50370310	50370474	0.027273	-0.341
ATP6V1G2-DDX39B	A3SS	chr6	-	31508098	31508343	31508098	31508311	31509726	31509925	0.0292661	-0.141
PCNP	A3SS	chr3	+	101298633	101298848	101298685	101298848	101293041	101293123	0.0329489	0.273
RPS18	A3SS	chr6	+	33240406	33240503	33240411	33240503	33239851	33239899	0.0371815	0.505
AARSD1	A3SS	chr17	-	41107174	41107384	41107174	41107241	41107858	41108093	0.0420315	-0.217
AP1G2	A3SS	chr14	-	24034327	24034551	24034327	24034408	24034814	24034910	0.042056	0.12
geneSymbol	Type	chr	strand	longExonStart_0base	longExonEnd	shortES	shortEE	flankingES	flankingEE	FDR	IncLevelDifference
PCNXL4	A5SS	chr14	+	60590935	60591969	60590935	60591028	60592354	60592525	0	0.299
MRPL14	A5SS	chr6	-	44094991	44095191	44095080	44095191	44084277	44084366	0	0.195
HNRNPC	A5SS	chr14	-	21699116	21699231	21699155	21699231	21698477	21698525	0	-0.114
CCDC14	A5SS	chr3	-	123665649	123666166	123666126	123666166	123663695	123663837	8.33852e-10	0.431
SNHG5	A5SS	chr6	-	86387512	86387730	86387671	86387730	86387141	86387210	2.44643e-08	0.112
TACC1	A5SS	chr8	+	38684685	38684893	38684685	38684806	38688642	38688695	5.24531e-07	-0.299
GMFG	A5SS	chr19	-	39825900	39826143	39826074	39826143	39823716	39823766	9.62517e-07	0.192
WBSCR22	A5SS	chr7	+	73098096	73098330	73098096	73098134	73100965	73101061	1.17444e-06	-0.213
SPECC1L	A5SS	chr22	+	24717255	24718886	24717255	24717291	24720187	24720395	3.90551e-06	0.411
UBE4A	A5SS	chr11	+	118243221	118243402	118243221	118243381	118243800	118244003	7.96293e-06	-0.168
TMEM106C	A5SS	chr12	+	48359871	48360012	48359871	48359955	48360465	48360512	1.06141e-05	-0.201
FAM208A	A5SS	chr3	-	56667071	56667994	56667926	56667994	56662519	56662642	1.30409e-05	0.401
WBSCR22	A5SS	chr7	+	73098096	73098231	73098096	73098134	73100965	73101061	3.33552e-05	-0.209
STAG3L5P-PVRIG2P-PILRB	A5SS	chr7	+	99950995	99951635	99950995	99951106	99952765	99952863	0.000232114	-0.127
SAFB2	A5SS	chr19	-	5616138	5616346	5616142	5616346	5613475	5613538	0.000262782	0.206
C14orf159	A5SS	chr14	+	91671052	91671211	91671052	91671169	91681748	91681900	0.000396317	-0.353
ATP5J2-PTCD1	A5SS	chr7	-	99063733	99063824	99063751	99063824	99057708	99057816	0.000396317	-0.112
WBSCR22	A5SS	chr7	+	73098096	73098253	73098096	73098134	73100965	73101061	0.000413534	-0.164
WBSCR22	A5SS	chr7	+	73098096	73098276	73098096	73098134	73100965	73101061	0.000476304	-0.157
DALRD3	A5SS	chr3	-	49054044	49054277	49054206	49054277	49053861	49053944	0.000512613	0.403
RHOT2	A5SS	chr16	+	718357	718569	718357	718411	718655	718699	0.000697012	0.228
RNASEK-C17orf49	A5SS	chr17	+	6919813	6920004	6919813	6919844	6920228	6920333	0.00136436	0.121
UBE2D2	A5SS	chr5	+	138994336	138994557	138994336	138994359	139002952	139003046	0.00167342	0.294
HIPK1	A5SS	chr1	+	114499745	114499908	114499745	114499806	114500687	114500912	0.00167342	-0.106
DAP3	A5SS	chr1	+	155658884	155659034	155658884	155658965	155679563	155679615	0.00171819	-0.156
HDHD2	A5SS	chr18	-	44662672	44662820	44662709	44662820	44660866	44661075	0.00171819	-0.239
SLC38A1	A5SS	chr12	-	46662308	46663208	46662647	46663208	46636982	46637097	0.002225	-0.227
CD79A	A5SS	chr19	+	42383059	42383359	42383059	42383245	42383604	42383723	0.00250206	0.205
USP20	A5SS	chr9	+	132631950	132632198	132631950	132632123	132632731	132632826	0.00265869	-0.189
PFDN5	A5SS	chr12	+	53689622	53689732	53689622	53689725	53691633	53691708	0.00288538	0.211
ANAPC16	A5SS	chr10	+	73975757	73975990	73975757	73975830	73983645	73983814	0.00348001	-0.289
PCBP1-AS1	A5SS	chr2	-	70310638	70310819	70310669	70310819	70278334	70278437	0.00349281	-0.405
COPS5	A5SS	chr8	-	67974088	67974562	67974340	67974562	67971445	67971680	0.00506006	0.166
RFXANK	A5SS	chr19	+	19307827	19308060	19307827	19307855	19308329	19308430	0.00565399	0.146
ENY2	A5SS	chr8	+	110346551	110346703	110346551	110346631	110348356	110348433	0.0116836	0.159
ANAPC16	A5SS	chr10	+	73975757	73975896	73975757	73975830	73983645	73983814	0.0126412	-0.216
PRRC2C	A5SS	chr1	+	171483674	171483784	171483674	171483769	171484872	171484998	0.0126412	-0.132
LETMD1	A5SS	chr12	+	51445874	51446029	51445874	51445990	51447560	51447643	0.0148032	-0.245
AURKC	A5SS	chr19	+	57743909	57744053	57743909	57744048	57744827	57744976	0.0148032	0.505
RNASEK-C17orf49	A5SS	chr17	+	6919813	6920000	6919813	6919844	6920228	6920333	0.0174423	0.185
CPT1B	A5SS	chr22	-	51015752	51015892	51015784	51015892	51015249	51015463	0.0178201	-0.284
PAPD4	A5SS	chr5	+	78938654	78938808	78938654	78938733	78940945	78941015	0.0180556	-0.11
HMGN3	A5SS	chr6	-	79911992	79912104	79912033	79912104	79910961	79911443	0.0182635	-0.242
SRRM2	A5SS	chr16	+	2818541	2818768	2818541	2818600	2818997	2819285	0.0217275	0.196
NAP1L4	A5SS	chr11	-	3009302	3009356	3009306	3009356	3000436	3000467	0.0242629	-0.17
ATP5J	A5SS	chr21	-	27107163	27107341	27107249	27107341	27101941	27102112	0.0242629	0.127
KLC1	A5SS	chr14	+	104145744	104145882	104145744	104145855	104153417	104153548	0.0252302	-0.159
ZNF791	A5SS	chr19	+	12723039	12723179	12723039	12723130	12734513	12734640	0.0259368	-0.28
RNF31	A5SS	chr14	+	24617466	24617686	24617466	24617622	24617850	24617910	0.0266642	-0.264
TMEM230	A5SS	chr20	-	5092141	5092251	5092145	5092251	5089977	5090091	0.0281325	0.497
RNASEK-C17orf49	A5SS	chr17	+	6919813	6919904	6919813	6919844	6920228	6920333	0.0281325	0.184
RPL23AP7	A5SS	chr2	-	114384457	114384715	114384614	114384715	114383185	114383306	0.0336415	-0.321
CLIP4	A5SS	chr2	+	29380069	29380268	29380069	29380213	29383198	29383333	0.0386819	-0.238
geneSymbol	Type	chr	strand	X1stExonStart_0base	X1stExonEnd	X2ndExonStart_0base	X2ndExonEnd	upstreamES	upstreamEE	downstreamES	downstreamEE	FDR	IncLevelDifference
ZFAS1	MXE	chr20	+	47895645	47895745	47897439	47897501	47894714	47895253	47905581	47905795	0	0.203
HSPH1	MXE	chr13	-	31715258	31715396	31718015	31718060	31713136	31713244	31719699	31719905	0	-0.422
HNRNPC	MXE	chr14	-	21699116	21699231	21702236	21702388	21698477	21698525	21731469	21731495	4.73603e-12	0.129
ILF2	MXE	chr1	-	153635167	153635271	153635494	153635609	153634263	153635032	153635690	153635752	5.68323e-12	0.163
ILF2	MXE	chr1	-	153635163	153635271	153635494	153635609	153634263	153635032	153635690	153635752	5.68323e-12	0.163
ILF2	MXE	chr1	-	153635690	153635752	153636518	153636606	153635180	153635271	153636871	153636950	5.99897e-11	0.146
HNRNPC	MXE	chr14	-	21699116	21699231	21702236	21702388	21698477	21698525	21737456	21737638	3.53135e-10	0.181
HNRNPD	MXE	chr4	-	83280620	83280792	83292680	83292737	83279811	83279973	83294598	83295149	5.17411e-10	-0.149
HNRNPD	MXE	chr4	-	83280716	83280792	83292680	83292737	83279811	83279973	83294598	83295149	8.60604e-10	-0.148
HNRNPD	MXE	chr4	-	83280696	83280792	83292680	83292737	83279811	83279973	83294598	83295149	8.60604e-10	-0.148
HNRNPD	MXE	chr4	-	83280721	83280792	83292680	83292737	83279811	83279973	83294598	83295149	5.53585e-09	-0.144
GMFG	MXE	chr19	-	39823716	39823766	39825900	39825950	39818996	39819188	39826074	39826171	1.52982e-08	0.117
GMFG	MXE	chr19	-	39823716	39823766	39825900	39825950	39819639	39819713	39826074	39826171	1.18474e-07	0.126
RPAIN	MXE	chr17	+	5326088	5326149	5329290	5329402	5324615	5324786	5329555	5329619	1.20901e-07	-0.201
GMFG	MXE	chr19	-	39825900	39825950	39826074	39826194	39823716	39823766	39826613	39826726	7.98602e-07	-0.102
ACSL1	MXE	chr4	-	185691408	185691486	185691552	185691630	185689469	185689604	185694234	185694308	2.33132e-06	0.302
FAM208A	MXE	chr3	-	56667071	56667871	56667926	56667994	56662519	56662642	56674013	56674158	1.28695e-05	-0.293
RFXANK	MXE	chr19	+	19307994	19308060	19308329	19308430	19307771	19307855	19308915	19309041	1.30897e-05	0.181
HNRNPD	MXE	chr4	-	83276456	83276546	83277689	83277836	83274466	83275307	83277948	83278048	1.51691e-05	0.12
OGT	MXE	chrX	+	70757678	70757922	70764416	70764485	70752911	70753186	70767756	70767873	2.5248e-05	0.108
CD1E	MXE	chr1	+	158324166	158324463	158325616	158325791	158323485	158323836	158326287	158326381	3.87634e-05	0.181
FLOT2	MXE	chr17	-	27211242	27211333	27212874	27212965	27210125	27210249	27215962	27216044	5.15788e-05	-0.153
GMFG	MXE	chr19	-	39825900	39825945	39826074	39826143	39823716	39823766	39826613	39826726	5.15788e-05	-0.128
GMFG	MXE	chr19	-	39825900	39825945	39826074	39826194	39823716	39823766	39826613	39826726	7.48595e-05	-0.133
KIAA0226L	MXE	chr13	-	46946075	46946732	46952024	46952140	46942867	46942950	46961268	46961635	9.879e-05	-0.126
STAG3L5P-PVRIG2P-PILRB	MXE	chr7	+	99950995	99951106	99951517	99951635	99950619	99950746	99952765	99952863	0.00010398	0.108
MYSM1	MXE	chr1	-	59134101	59134238	59134303	59134354	59133518	59133593	59134655	59134710	0.000146526	-0.347
FAM208A	MXE	chr3	-	56667071	56667871	56667926	56667994	56662519	56662642	56672733	56672793	0.000165706	-0.266
HSPH1	MXE	chr13	-	31715258	31715396	31717928	31718060	31714320	31714446	31719699	31719905	0.000171342	-0.18
CD1E	MXE	chr1	+	158324166	158324463	158325616	158325730	158323485	158323836	158326553	158327343	0.000190519	0.182
CD1E	MXE	chr1	+	158324166	158324463	158325616	158325895	158323485	158323836	158326553	158327343	0.000190519	0.182
DALRD3	MXE	chr3	-	49054044	49054106	49054206	49054277	49053861	49053944	49054660	49054789	0.000234328	-0.264
DGKA	MXE	chr12	+	56332294	56332344	56332421	56332482	56331761	56331836	56332698	56332773	0.000359633	0.136
FAM208A	MXE	chr3	-	56667689	56667871	56667926	56667994	56662519	56662642	56672733	56672793	0.000384185	-0.213
KIAA0226L	MXE	chr13	-	46946075	46946732	46952020	46952140	46942897	46942950	46961268	46961635	0.000384185	-0.109
ITGAE	MXE	chr17	-	3623600	3623696	3626581	3626677	3619981	3620092	3626981	3627038	0.000660248	0.137
IP6K2	MXE	chr3	-	48731891	48731958	48732126	48732257	48730883	48731673	48732522	48732854	0.000711774	-0.472
CKLF-CMTM1	MXE	chr16	+	66592092	66592251	66597024	66597120	66586465	66586696	66611006	66611105	0.000720751	0.165
MTA1	MXE	chr14	+	105912003	105912074	105915695	105915746	105911754	105911848	105916394	105916521	0.00102771	-0.135
AP1G2	MXE	chr14	-	24035770	24035895	24036319	24036524	24035486	24035628	24036947	24037045	0.00106922	-0.222
KIAA0226L	MXE	chr13	-	46946700	46946732	46952024	46952140	46946075	46946345	46961268	46961635	0.00106922	-0.344
KIAA0226L	MXE	chr13	-	46946075	46946345	46952024	46952140	46942867	46942950	46961268	46961635	0.00121913	-0.124
RAD17	MXE	chr5	+	68666910	68666998	68667860	68668044	68665886	68666111	68669656	68669914	0.00122966	-0.308
KIAA0226L	MXE	chr13	-	46946075	46946213	46952024	46952140	46942867	46942950	46961268	46961635	0.00129519	-0.124
CKLF	MXE	chr16	+	66592092	66592251	66597024	66597120	66586465	66586696	66599788	66600190	0.00152878	0.112
CD1E	MXE	chr1	+	158324166	158324463	158325616	158325730	158323485	158323836	158326287	158326381	0.00175467	0.148
MTA1	MXE	chr14	+	105912003	105912112	105915695	105915746	105911754	105911848	105916394	105916521	0.00182083	-0.131
PFDN1	MXE	chr5	-	139661033	139661118	139680000	139680167	139624634	139625642	139682625	139682689	0.00182838	0.148
MYSM1	MXE	chr1	-	59134101	59134238	59134303	59134369	59133518	59133593	59134655	59134710	0.0020997	-0.378
ARPC4-TTLL3	MXE	chr3	+	9854931	9855029	9868680	9868924	9854626	9854795	9870643	9871079	0.00223825	-0.187
ACADVL	MXE	chr17	+	7124242	7124376	7125270	7125400	7124084	7124149	7125495	7125621	0.0023029	-0.115
WDR6	MXE	chr3	+	49048853	49049030	49051488	49051549	49044636	49044964	49051642	49051726	0.00352873	-0.17
HSPH1	MXE	chr13	-	31714320	31714446	31715258	31715396	31713136	31713244	31717928	31718060	0.00375054	-0.156
EIF6	MXE	chr20	-	33868456	33868632	33871978	33872211	33867744	33867921	33872528	33872619	0.00375054	-0.102
WDR6	MXE	chr3	+	49048853	49049030	49051435	49051549	49044636	49044964	49051642	49051726	0.00390583	-0.168
KIAA0226L	MXE	chr13	-	46946075	46946345	46952020	46952140	46942897	46942950	46961268	46961635	0.0039866	-0.11
KIAA0226L	MXE	chr13	-	46946075	46946213	46952020	46952140	46942897	46942950	46961268	46961635	0.00435006	-0.11
POFUT2	MXE	chr21	-	46705060	46705144	46705183	46705243	46703266	46703442	46705592	46705843	0.00504742	0.493
HDAC7	MXE	chr12	-	48189989	48190081	48190799	48190925	48189369	48189550	48191166	48191282	0.00516037	0.165
TNFAIP3	MXE	chr6	+	138196824	138196972	138196972	138197061	138195981	138196172	138197132	138197303	0.00525606	0.101
ARPP21	MXE	chr3	+	35748942	35749033	35750460	35750562	35748465	35748574	35756930	35756968	0.00530458	-0.342
BPNT1	MXE	chr1	-	220237600	220237757	220239414	220239459	220236098	220236296	220240643	220240735	0.00553796	0.184
RAD17	MXE	chr5	+	68666865	68666998	68667983	68668044	68665557	68665760	68669656	68669914	0.00558237	-0.294
RAD17	MXE	chr5	+	68666861	68666998	68667860	68668044	68665638	68665760	68669656	68669914	0.00709331	-0.243
VRK3	MXE	chr19	-	50498447	50498532	50500760	50500827	50496116	50496209	50504046	50504111	0.00780995	0.238
CKLF	MXE	chr16	+	66592092	66592251	66596974	66597120	66586465	66586696	66599788	66600190	0.00897927	0.124
IP6K2	MXE	chr3	-	48731891	48731958	48732134	48732257	48730883	48731673	48732522	48732854	0.00918389	-0.503
PRPF38B	MXE	chr1	+	109238776	109238959	109240568	109240639	109238323	109238392	109241225	109241449	0.0123901	-0.185
WRAP73	MXE	chr1	-	3551723	3551858	3552507	3552594	3551560	3551638	3553558	3553662	0.0142707	-0.174
RAD17	MXE	chr5	+	68666861	68666998	68667860	68668044	68665886	68666111	68669656	68669914	0.0143961	-0.258
PHYKPL	MXE	chr5	-	177651448	177651565	177651616	177651730	177649852	177649935	177658405	177658524	0.0158033	-0.341
DAP3	MXE	chr1	+	155679563	155679615	155686796	155686919	155658884	155659034	155691307	155691409	0.0161772	-0.147
FAM208A	MXE	chr3	-	56667926	56667994	56672733	56672793	56662519	56662642	56674013	56674158	0.0162866	0.164
ARPP21	MXE	chr3	+	35750460	35750562	35756930	35756968	35748465	35748574	35763096	35763326	0.0172007	0.221
CDK10	MXE	chr16	+	89760580	89760640	89761338	89761478	89759681	89759734	89761700	89761753	0.0188949	-0.165
CASP8	MXE	chr2	+	202141549	202141691	202141756	202141827	202139588	202139676	202149538	202150040	0.0204471	0.121
AP4B1	MXE	chr1	-	114442525	114443022	114444376	114444507	114441339	114441423	114445259	114445484	0.0214504	-0.253
WDR6	MXE	chr3	+	49048853	49049030	49049067	49049174	49044636	49044964	49049454	49049678	0.0226212	-0.144
WDR6	MXE	chr3	+	49048853	49049067	49049067	49049174	49044636	49044964	49049454	49049678	0.0226212	-0.144
ZNF195	MXE	chr11	-	3383775	3383832	3390006	3390085	3379156	3381795	3392204	3392300	0.0246647	-0.107
RCOR3	MXE	chr1	+	211477424	211477482	211485696	211485829	211469017	211469095	211486061	211486655	0.024916	-0.215
IP6K2	MXE	chr3	-	48731891	48731958	48732126	48732274	48730883	48731673	48732522	48732854	0.0249628	-0.476
DPH7	MXE	chr9	-	140470760	140470854	140471921	140472055	140470531	140470619	140473076	140473387	0.0276605	-0.326
NUMA1	MXE	chr11	-	71746947	71747021	71780887	71780957	71740250	71740336	71791503	71791739	0.029071	-0.13
SPECC1L	MXE	chr22	+	24672667	24672771	24698162	24698352	24666784	24666951	24709280	24709434	0.029071	0.123
CKLF	MXE	chr16	+	66592092	66592251	66597052	66597120	66586465	66586696	66599788	66600190	0.0293415	0.117
BRD8	MXE	chr5	-	137503704	137503767	137504158	137504377	137501516	137501797	137504910	137505047	0.0298393	-0.144
CD1E	MXE	chr1	+	158325616	158325895	158326287	158326381	158323485	158323836	158326553	158327343	0.0314577	-0.112
CD1E	MXE	chr1	+	158325616	158325730	158326287	158326381	158323485	158323836	158326553	158327343	0.0314577	-0.112
RAB6A	MXE	chr11	-	73429657	73429763	73429829	73429935	73427295	73427407	73431890	73431944	0.0314577	-0.116
PPHLN1	MXE	chr12	+	42748962	42749024	42768664	42768876	42729684	42729776	42781257	42781337	0.0325933	-0.25
RPL27A	MXE	chr11	+	8705409	8705628	8706264	8706438	8704748	8704812	8707224	8711419	0.0329928	0.1
N4BP2L2	MXE	chr13	-	33095509	33095586	33101544	33101669	33091029	33092140	33109905	33111164	0.0344426	0.11
DLG1	MXE	chr3	-	196802707	196802741	196803452	196803553	196796089	196796131	196807921	196807988	0.0354218	-0.243
TNFAIP3	MXE	chr6	+	138196972	138197061	138197132	138197303	138195981	138196172	138198212	138198393	0.0354218	-0.113
EMC8	MXE	chr16	-	85813984	85814079	85814816	85814876	85812230	85813473	85822579	85822656	0.0357806	-0.128
QTRT1	MXE	chr19	+	10818175	10818291	10822836	10822887	10817977	10818056	10823433	10823543	0.0362257	0.179
PPHLN1	MXE	chr12	+	42745686	42745851	42748962	42749024	42729684	42729776	42835116	42835231	0.0362257	0.197
RAD17	MXE	chr5	+	68666861	68666998	68667983	68668044	68665557	68665760	68669656	68669914	0.0374219	-0.237
LINC01125	MXE	chr2	+	98315488	98315599	98317616	98317767	98306718	98306790	98319131	98319529	0.0374219	-0.444
CCHCR1	MXE	chr6	-	31124795	31124932	31125161	31125277	31124507	31124721	31125943	31126015	0.0374219	0.167
ERBB2IP	MXE	chr5	+	65291039	65291181	65292955	65293056	65290574	65290692	65307876	65307955	0.0374219	0.167
CAPZA2	MXE	chr7	+	116520120	116520201	116524921	116524998	116502562	116502704	116528180	116528244	0.0389394	0.167
PPP2R5C	MXE	chr14	+	102290350	102290527	102298037	102298141	102276139	102276373	102323022	102323222	0.0389394	0.167
SKA2	MXE	chr17	-	57196679	57196856	57208641	57208722	57187307	57189706	57232491	57232800	0.0403916	-0.172
C1RL-AS1	MXE	chr12	+	7261720	7261832	7262659	7262743	7261268	7261543	7262893	7263168	0.0406542	0.278
KRIT1	MXE	chr7	-	91873329	91873463	91874778	91874888	91871347	91871451	91875103	91875228	0.0406542	0.167
WARS	MXE	chr14	-	100835423	100835558	100841619	100841743	100828044	100828258	100842596	100842680	0.0416945	-0.104
C5orf42	MXE	chr5	-	37243109	37243221	37244476	37244585	37239814	37239971	37245580	37245700	0.0416945	-0.167
C16orf13	MXE	chr16	-	684888	684956	685611	685774	684718	684797	686093	686366	0.0416945	-0.115
MAP3K7	MXE	chr6	-	91247051	91247129	91252178	91252248	91246055	91246120	91254270	91254351	0.0416945	0.333
VAPA	MXE	chr18	+	9936982	9937063	9950391	9950616	9913954	9914332	9954049	9960018	0.0419672	-0.333
FRS2	MXE	chr12	+	69885317	69885431	69924069	69924145	69864128	69864310	69924644	69924740	0.0420978	-0.5
SENP3-EIF4A1	MXE	chr17	+	7477865	7477996	7479841	7480014	7477577	7477626	7480373	7480483	0.0420978	0.111
AP1G2	MXE	chr14	-	24035024	24035238	24035272	24035353	24034814	24034910	24035486	24035628	0.0430817	-0.113
RBM23	MXE	chr14	-	23386236	23386375	23387812	23387924	23380536	23380612	23388207	23388396	0.043512	0.556
LOC150776	MXE	chr2	+	132258917	132259081	132263884	132263998	132258753	132258806	132266109	132266181	0.043512	0.5
CASP8	MXE	chr2	+	202137620	202137665	202141549	202141827	202137360	202137499	202149538	202150040	0.043512	0.196
C16orf13	MXE	chr16	-	684888	685063	685611	685774	684718	684797	686093	686366	0.0439039	-0.116
TAF8	MXE	chr6	+	42039088	42039206	42040647	42040768	42036202	42036345	42044837	42044977	0.0443253	0.167
ARIH2	MXE	chr3	+	48960180	48960244	48964894	48965246	48956280	48956431	48999044	48999112	0.0444567	-0.224
DALRD3	MXE	chr3	-	49054044	49054106	49054206	49054249	49053861	49053944	49054660	49054789	0.0460455	-0.199
ARIH2	MXE	chr3	+	49005966	49006088	49008027	49008274	49002351	49002415	49011131	49011249	0.0474328	0.278
C16orf13	MXE	chr16	-	684888	685095	685611	685774	684718	684797	686093	686366	0.0474328	-0.115
EEF1D	MXE	chr8	-	144676044	144676237	144679011	144679150	144668898	144669022	144679517	144679845	0.0476085	-0.167
HSPE1-MOB4	MXE	chr2	+	198365814	198365962	198367762	198367852	198364720	198365163	198400253	198400354	0.0486919	-0.25
SLC38A1	MXE	chr12	-	46633461	46633676	46636982	46637097	46623346	46623422	46662647	46663208	0.0492547	0.145
SHMT1	MXE	chr17	-	18256985	18257131	18259199	18259310	18250809	18250970	18266685	18266877	0.0494058	-0.162
FKBP5	MXE	chr6	-	35611053	35611125	35613939	35614143	35610496	35610620	35656580	35656719	0.0494058	0.218
UBE2K	MXE	chr4	+	39757276	39757359	39776453	39776553	39747371	39747430	39779979	39784410	0.0494058	-0.1
geneSymbol	Type	chr	strand	riExonStart_0base	riExonEnd	upstreamES	upstreamEE	downstreamES	downstreamEE	FDR	IncLevelDifference
ACADVL	RI	chr17	+	7127955	7128202	7127955	7128033	7128127	7128202	0	-0.221
CDK17	RI	chr12	-	96672038	96674663	96672038	96674057	96674585	96674663	1.78594e-11	0.37
CPNE1	RI	chr20	-	34218662	34218883	34218662	34218717	34218822	34218883	4.84557e-11	-0.117
HMGN3	RI	chr6	-	79910961	79912106	79910961	79911443	79911992	79912106	1.35079e-07	0.246
NAP1L1	RI	chr12	-	76439162	76442244	76439162	76441498	76442172	76442244	2.84879e-07	-0.169
ACADVL	RI	chr17	+	7127802	7128033	7127802	7127871	7127960	7128033	2.84879e-07	-0.126
ACADVL	RI	chr17	+	7127471	7127712	7127471	7127562	7127639	7127712	1.09132e-06	-0.101
AKAP8L	RI	chr19	-	15514285	15514526	15514285	15514366	15514468	15514526	1.31726e-06	-0.135
GLG1	RI	chr16	-	74481325	74487232	74481325	74486029	74487068	74487232	1.31726e-06	0.235
SGSM3	RI	chr22	+	40804777	40805022	40804777	40804846	40804936	40805022	2.863e-06	-0.151
FAM96B	RI	chr16	-	66967889	66968326	66967889	66967967	66968123	66968326	6.02912e-06	-0.135
CDCA8	RI	chr1	+	38158072	38158456	38158072	38158250	38158347	38158456	7.94574e-06	-0.312
COMMD3-BMI1	RI	chr10	+	22607586	22607791	22607586	22607642	22607734	22607791	8.4618e-06	-0.126
MAPKAPK5-AS1	RI	chr12	-	112277572	112278281	112277572	112277807	112278136	112278281	1.39843e-05	0.285
CANT1	RI	chr17	-	76993073	76994045	76993073	76993726	76993921	76994045	4.52097e-05	0.344
KDM2B	RI	chr12	-	121866899	121868272	121866899	121867966	121868144	121868272	8.87024e-05	0.121
THYN1	RI	chr11	-	134122733	134123260	134122733	134122810	134123120	134123260	0.000120977	-0.196
WRAP73	RI	chr1	-	3551560	3551808	3551560	3551638	3551723	3551808	0.000141709	-0.168
PCID2	RI	chr13	-	113831852	113832601	113831852	113832322	113832487	113832601	0.000176469	-0.227
FER1L4	RI	chr20	-	34164517	34164750	34164517	34164618	34164707	34164750	0.000283003	-0.1
MRPS21	RI	chr1	+	150266261	150266869	150266261	150266318	150266754	150266869	0.00032171	-0.143
CIRBP	RI	chr19	+	1271979	1273171	1271979	1272050	1272425	1273171	0.000347681	0.133
NAPA	RI	chr19	-	47996207	47996431	47996207	47996302	47996375	47996431	0.000389349	-0.111
PIH1D1	RI	chr19	-	49951083	49951316	49951083	49951165	49951257	49951316	0.000970435	-0.143
MRPL52	RI	chr14	+	23299091	23299319	23299091	23299149	23299258	23299319	0.00419234	-0.262
LUC7L3	RI	chr17	+	48827861	48830072	48827861	48828055	48829560	48830072	0.00419234	0.103
AP1G2	RI	chr14	-	24032588	24032818	24032588	24032711	24032792	24032818	0.00419234	-0.131
ULK3	RI	chr15	-	75132574	75132982	75132574	75132657	75132838	75132982	0.00419234	-0.211
HRAS	RI	chr11	-	532241	532755	532241	532522	532630	532755	0.00419234	-0.148
OTUB1	RI	chr11	+	63764001	63764413	63764001	63764120	63764328	63764413	0.00471913	0.14
RNF123	RI	chr3	+	49751170	49751415	49751170	49751258	49751342	49751415	0.00480064	-0.18
WDR6	RI	chr3	+	49051488	49051726	49051488	49051549	49051642	49051726	0.00745955	-0.17
CPSF1	RI	chr8	-	145620312	145620550	145620312	145620397	145620479	145620550	0.00836584	-0.131
NFATC4	RI	chr14	+	24845499	24848811	24845499	24846084	24846843	24848811	0.00891964	0.174
C18orf21	RI	chr18	+	33552587	33552870	33552587	33552768	33552847	33552870	0.00946228	-0.274
NT5DC2	RI	chr3	-	52561846	52562089	52561846	52561947	52562028	52562089	0.0095395	-0.103
UNC13D	RI	chr17	-	73827178	73827342	73827178	73827250	73827323	73827342	0.0110105	-0.116
MUTYH	RI	chr1	-	45798434	45798628	45798434	45798506	45798589	45798628	0.0126604	-0.353
SMG1	RI	chr16	-	18881931	18882178	18881931	18882033	18882122	18882178	0.0126604	0.119
SYTL3	RI	chr6	+	159083781	159084410	159083781	159083844	159084236	159084410	0.0126604	-0.167
METTL17	RI	chr14	+	21464685	21465194	21464685	21464870	21464943	21465194	0.0127678	-0.157
ENOSF1	RI	chr18	-	670323	674406	670323	673076	674160	674406	0.0166963	-0.151
DMAP1	RI	chr1	+	44679124	44679530	44679124	44679199	44679380	44679530	0.016786	-0.267
WTAP	RI	chr6	+	160169222	160170453	160169222	160169401	160169621	160170453	0.016786	0.104
USP20	RI	chr9	+	132642391	132644117	132642391	132642568	132642745	132644117	0.0233277	-0.171
MRPL52	RI	chr14	+	23299091	23299319	23299091	23299149	23299261	23299319	0.0255042	-0.192
STX4	RI	chr16	+	31045546	31045857	31045546	31045646	31045782	31045857	0.0276577	-0.213
RAD23A	RI	chr19	+	13059936	13060147	13059936	13059973	13060091	13060147	0.0284909	-0.102
HNRNPM	RI	chr19	+	8530207	8530399	8530207	8530246	8530363	8530399	0.0396129	-0.118
SARS2	RI	chr19	-	39408578	39408779	39408578	39408648	39408733	39408779	0.043326	-0.168
DNAJC4	RI	chr11	+	64001365	64001753	64001365	64001452	64001544	64001753	0.043326	-0.231
VPS28	RI	chr8	-	145648983	145649515	145648983	145649305	145649423	145649515	0.043326	-0.202
U2AF1L4	RI	chr19	-	36234970	36235322	36234970	36235046	36235223	36235322	0.043326	-0.169
PNKP	RI	chr19	-	50364705	50364942	50364705	50364767	50364864	50364942	0.043326	-0.274
IDH3G	RI	chrX	-	153051220	153051727	153051220	153051428	153051666	153051727	0.0473995	-0.133
GPAA1	RI	chr8	+	145138883	145139105	145138883	145138943	145139036	145139105	0.0484847	-0.1
RGL2	RI	chr6	-	33263994	33264241	33263994	33264102	33264190	33264241	0.0484847	-0.153
HNRNPL	RI	chr19	-	39331004	39331199	39331004	39331016	39331127	39331199	0.0488062	-0.14

## Sheet: 2
ASEs detected in Jurkat iHBZ
geneSymbol	Type	chr	strand	exonStart_0base	exonEnd	upstreamES	upstreamEE	downstreamES	downstreamEE	FDR	IncLevelDifference
CLK1	SE	chr2	-	201724847	201724938	201724402	201724469	201725960	201726171	0	0.378
CLK1	SE	chr2	-	201724847	201724935	201724402	201724469	201725960	201726189	0	0.396
DDX46	SE	chr5	+	134125795	134125912	134124202	134124281	134126159	134126242	0	0.138
SNRNP70	SE	chr19	+	49605370	49605442	49604646	49604728	49607890	49607992	0	-0.113
SNRNP70	SE	chr19	+	49605370	49605430	49604646	49604728	49607890	49607992	0	-0.134
SNRNP70	SE	chr19	+	49605370	49605425	49604646	49604728	49607890	49607992	0	-0.116
HNRNPD	SE	chr4	-	83292680	83292737	83280696	83280792	83294598	83295149	0	-0.186
ZFAS1	SE	chr20	+	47897439	47897501	47895645	47895745	47905581	47905795	0	-0.238
HSPH1	SE	chr13	-	31717928	31718060	31715258	31715396	31719699	31719905	0	-0.395
FLNA	SE	chrX	-	153580920	153581039	153580548	153580815	153581139	153581276	0	0.184
FLNA	SE	chrX	-	153580920	153581043	153580548	153580815	153581139	153581276	0	0.109
OGT	SE	chrX	+	70764416	70764485	70757678	70757922	70767756	70767873	0	-0.297
EIF4A2	SE	chr3	+	186506098	186506209	186505542	186505671	186506913	186507685	0	-0.121
MYB	SE	chr6	+	135508971	135509043	135507040	135507158	135510928	135511021	0	-0.164
MYB	SE	chr6	+	135508950	135509043	135507040	135507158	135510928	135511021	0	-0.245
SRSF3	SE	chr6	+	36567888	36568053	36566625	36566760	36568928	36568967	0	0.248
SRSF3	SE	chr6	+	36567597	36568053	36566625	36566760	36568928	36568967	0	0.328
NASP	SE	chr1	+	46072992	46074009	46072097	46072263	46078840	46078920	0	0.154
LEF1	SE	chr4	-	108984778	108984835	108968700	108969907	108985491	108985676	0	-0.265
LEF1	SE	chr4	-	109002741	109002825	109000647	109000770	109004511	109004602	0	-0.207
LEF1	SE	chr4	-	108984778	108984819	108968700	108969907	108985491	108985676	0	-0.273
LEF1	SE	chr4	-	108984778	108984813	108968700	108969907	108985491	108985540	0	-0.244
IARS	SE	chr9	-	95015643	95015735	95014089	95014167	95018961	95019082	3.22318e-13	-0.13
IARS	SE	chr9	-	95015643	95015728	95014089	95014167	95018961	95019082	3.22318e-13	-0.205
BPTF	SE	chr17	+	65959448	65959622	65955656	65955991	65960327	65960520	2.1273e-12	0.488
HMGCS1	SE	chr5	-	43298110	43298236	43297103	43297268	43298619	43299077	3.07898e-12	-0.363
RSRP1	SE	chr1	-	25570944	25570989	25570040	25570124	25571640	25571792	3.07898e-12	-0.417
CSNK1D	SE	chr17	-	80203851	80203915	80200536	80202707	80206750	80206890	4.2546e-12	-0.335
CNOT2	SE	chr12	+	70726546	70726626	70713077	70713144	70729217	70729343	6.48567e-12	-0.502
MRPL42	SE	chr12	+	93864261	93864281	93862964	93863131	93870729	93870793	1.13962e-11	-0.15
HDAC1	SE	chr1	+	32794668	32794761	32793136	32793278	32796178	32796287	1.86139e-11	-0.117
SAT1	SE	chrX	+	23802410	23802520	23801916	23802000	23803444	23803546	1.86139e-11	-0.398
HSD17B4	SE	chr5	+	118807330	118807395	118792009	118792063	118809602	118809710	2.93094e-11	-0.363
SREK1	SE	chr5	+	65454636	65454760	65449290	65449424	65455046	65455162	3.81526e-11	-0.384
MORF4L2	SE	chrX	-	102939608	102939657	102933426	102933579	102940098	102940188	3.84724e-11	-0.352
MSMO1	SE	chr4	+	166254491	166254777	166248817	166248916	166258940	166259089	7.05482e-11	0.379
CD53	SE	chr1	+	111440430	111440514	111434966	111435155	111441745	111442558	1.43593e-10	-0.245
HDAC7	SE	chr12	-	48189688	48189799	48189369	48189550	48189989	48190081	1.60173e-10	0.46
FIP1L1	SE	chr4	+	54280781	54280889	54265905	54266006	54292038	54292132	1.6507e-10	-0.282
FAM60A	SE	chr12	-	31457915	31458057	31451010	31451158	31478957	31479121	2.77534e-10	-0.169
HDAC1	SE	chr1	+	32794641	32794761	32793136	32793278	32796178	32796287	2.95114e-10	-0.206
MARCH7	SE	chr2	+	160621136	160621185	160619390	160619504	160623794	160625094	6.90651e-10	-0.156
POLDIP3	SE	chr22	-	42997975	42998062	42995703	42995799	42998775	42999166	8.19184e-10	-0.281
CCAR2	SE	chr8	+	22470529	22470649	22465481	22465578	22471604	22471827	9.83285e-10	-0.143
HMGCR	SE	chr5	+	74650880	74651039	74650327	74650522	74651189	74651347	1.06929e-09	0.243
PCNXL4	SE	chr14	+	60591831	60591969	60590942	60591028	60592354	60592541	1.11477e-09	0.396
MRPL42	SE	chr12	+	93864261	93864366	93862967	93863131	93870729	93870793	1.18002e-09	-0.119
EXOC7	SE	chr17	-	74086409	74086478	74085255	74085401	74090494	74090639	1.22474e-09	-0.253
MAZ	SE	chr16	+	29820860	29821085	29819835	29820062	29821397	29822504	1.41678e-09	0.195
IARS	SE	chr9	-	95017816	95017886	95014089	95014167	95018961	95019082	1.66334e-09	-0.648
LRIF1	SE	chr1	-	111493909	111495437	111492472	111492745	111506242	111506566	1.66727e-09	0.274
WNK1	SE	chr12	+	977031	978270	971248	971436	980430	980514	1.72196e-09	0.383
ARHGEF1	SE	chr19	+	42410608	42410772	42410090	42410177	42410854	42410955	2.21835e-09	0.13
MKI67	SE	chr10	-	129913191	129914271	129911690	129911866	129914754	129914800	2.27327e-09	0.375
CD53	SE	chr1	+	111436948	111437023	111434966	111435155	111441745	111442558	2.93401e-09	-0.239
FAM60A	SE	chr12	-	31457919	31458057	31451010	31451158	31478957	31479121	6.95411e-09	-0.132
CNOT2	SE	chr12	+	70723202	70723350	70713077	70713144	70729217	70729343	7.41665e-09	-0.489
ZCCHC10	SE	chr5	-	132335823	132335865	132332676	132334542	132342450	132342612	9.34264e-09	-0.352
THAP9-AS1	SE	chr4	-	83816844	83816927	83814604	83816000	83821229	83821383	1.04974e-08	-0.349
PTPRC	SE	chr1	+	198663146	198663269	198661475	198661502	198665840	198666038	1.04974e-08	0.287
CCNL1	SE	chr3	-	156874799	156874872	156870824	156870945	156876654	156876764	1.07602e-08	-0.254
CIRBP	SE	chr19	+	1272425	1272522	1271979	1272050	1274305	1274808	1.54898e-08	-0.32
HMGCS1	SE	chr5	-	43298110	43298218	43297103	43297268	43298619	43299077	1.83675e-08	-0.483
HNRNPD	SE	chr4	-	83292680	83292737	83279811	83279973	83294598	83295149	1.91171e-08	-0.109
CIRBP	SE	chr19	+	1272425	1272517	1271979	1272050	1274305	1274808	2.13574e-08	-0.318
ESYT2	SE	chr7	-	158542339	158542414	158540884	158540971	158552176	158552272	2.2492e-08	-0.124
RAPGEF1	SE	chr9	-	134525515	134525629	134518625	134518804	134526196	134526336	2.2492e-08	-0.307
GOLGA4	SE	chr3	+	37327504	37327552	37323448	37323763	37336469	37336568	3.00204e-08	-0.536
GPBP1	SE	chr5	+	56532939	56532999	56531792	56531859	56542126	56542311	3.1111e-08	-0.244
SAFB2	SE	chr19	-	5610299	5610432	5610019	5610106	5610649	5610699	3.70735e-08	0.176
SAFB2	SE	chr19	-	5610299	5610450	5610019	5610106	5610649	5610699	3.70735e-08	0.176
TCERG1	SE	chr5	+	145841580	145841659	145838446	145838900	145843113	145843356	3.80488e-08	-0.127
EXOC7	SE	chr17	-	74087223	74087316	74085255	74085401	74090494	74090662	4.38803e-08	-0.331
RBM5	SE	chr3	+	50141680	50141741	50140515	50140599	50142509	50142575	4.59186e-08	-0.284
COPE	SE	chr19	-	19017768	19017921	19016384	19016438	19021779	19021880	4.61255e-08	-0.14
FIP1L1	SE	chr4	+	54280800	54280889	54265905	54266006	54292038	54292132	4.61255e-08	-0.228
ILF2	SE	chr1	-	153635494	153635609	153635180	153635271	153635690	153635752	4.8879e-08	0.121
KIF2C	SE	chr1	+	45220421	45220517	45219404	45219505	45221600	45221655	5.66319e-08	-0.114
AP1G2	SE	chr14	-	24035770	24035895	24035486	24035628	24036319	24036528	5.90399e-08	0.268
HMGCR	SE	chr5	+	74650880	74651037	74650331	74650522	74651189	74651347	6.05087e-08	0.324
ILF2	SE	chr1	-	153635498	153635609	153635180	153635271	153635690	153635752	6.85947e-08	0.221
PFDN1	SE	chr5	-	139680000	139680167	139661033	139661118	139682625	139682689	7.02298e-08	0.19
AP1G2	SE	chr14	-	24035809	24035895	24035486	24035628	24036319	24036538	7.72678e-08	0.33
HMGCR	SE	chr5	+	74650880	74651084	74650327	74650522	74651189	74651347	7.72678e-08	0.322
BCLAF1	SE	chr6	-	136590278	136590441	136589299	136589477	136590574	136590750	7.72678e-08	0.205
CCNL1	SE	chr3	-	156874748	156874872	156870824	156870945	156876654	156876764	9.9312e-08	-0.223
CCNL1	SE	chr3	-	156874795	156874872	156870824	156870945	156876654	156876764	1.1572e-07	-0.223
AP1G2	SE	chr14	-	24035762	24035895	24035486	24035628	24036319	24036524	1.41469e-07	0.326
ORMDL1	SE	chr2	-	190647739	190647849	190647147	190647328	190648994	190649097	1.44646e-07	-0.385
SAP30BP	SE	chr17	+	73667895	73667943	73664595	73664705	73689519	73689562	1.513e-07	-0.201
KTN1	SE	chr14	+	56139889	56139973	56139646	56139730	56142552	56142636	1.6263e-07	-0.116
CCNL1	SE	chr3	-	156874724	156874872	156870824	156870945	156876654	156876764	1.67175e-07	-0.233
LRP12	SE	chr8	-	105544134	105544191	105521166	105521302	105601046	105601252	1.83709e-07	-0.366
ALDH1A2	SE	chr15	-	58305569	58305650	58302846	58302976	58306055	58306295	2.1063e-07	-0.108
HNRNPM	SE	chr19	+	8538547	8538592	8536209	8536311	8539050	8539128	2.19005e-07	-0.126
ABI1	SE	chr10	-	27047990	27048167	27040526	27040712	27054146	27054247	2.31109e-07	0.274
RBM6	SE	chr3	+	50036872	50036946	50012755	50012825	50085677	50085752	2.329e-07	-0.348
CPNE1	SE	chr20	-	34220084	34220156	34219866	34219947	34220232	34220307	2.53983e-07	0.144
EFR3A	SE	chr8	+	133013015	133013245	133008652	133008744	133014005	133014054	3.06561e-07	0.385
PTPRC	SE	chr1	+	198663146	198663390	198661475	198661502	198665840	198666038	3.08497e-07	0.234
PPP4R3B	SE	chr2	-	55805382	55805478	55804450	55804492	55806814	55806917	3.35404e-07	-0.402
OSBPL3	SE	chr7	-	24888687	24888795	24881897	24882032	24892122	24892253	3.58018e-07	-0.36
PUF60	SE	chr8	-	144902835	144902886	144900542	144900704	144903766	144903856	3.74299e-07	-0.209
TMEM219	SE	chr16	+	29983362	29983461	29982728	29982899	29984270	29984373	4.06097e-07	-0.143
BCLAF1	SE	chr6	-	136588166	136588313	136582402	136582615	136589299	136589477	4.3044e-07	0.194
SPOP	SE	chr17	-	47745388	47745440	47700094	47700238	47755294	47755525	4.34827e-07	-0.215
ENOSF1	SE	chr18	-	675320	675402	670323	674406	683245	683395	4.4403e-07	-0.141
CMC2	SE	chr16	-	81015410	81015482	81009698	81010076	81030918	81031034	4.48129e-07	-0.253
UBE2K	SE	chr4	+	39779301	39779430	39776453	39776553	39779979	39784410	4.65414e-07	-0.141
ANAPC16	SE	chr10	+	73983645	73983814	73975757	73975896	73990123	73990188	5.03882e-07	0.28
ZCCHC10	SE	chr5	-	132335823	132335893	132332676	132334542	132342450	132342612	5.12614e-07	-0.385
RBM39	SE	chr20	-	34328446	34328519	34326891	34326939	34328745	34328809	5.83928e-07	-0.207
CCNDBP1	SE	chr15	+	43486278	43486335	43484940	43485001	43486612	43486659	5.83928e-07	-0.249
THAP9-AS1	SE	chr4	-	83819141	83819215	83814604	83816000	83821229	83821376	6.39249e-07	-0.304
PTPRC	SE	chr1	+	198665840	198666038	198661475	198661502	198672426	198672501	6.69245e-07	-0.283
GOLGA4	SE	chr3	+	37330725	37330782	37323448	37323763	37336469	37336568	6.97638e-07	-0.405
RAD23A	SE	chr19	+	13059327	13059366	13059084	13059172	13059499	13059632	7.20702e-07	0.156
TRPT1	SE	chr11	-	63991571	63991682	63991270	63991439	63991756	63991887	7.60833e-07	0.197
SETD5	SE	chr3	+	9510202	9510259	9506108	9506356	9512142	9512613	7.87022e-07	-0.128
UHRF2	SE	chr9	+	6496962	6497103	6493825	6493932	6497197	6497360	9.80659e-07	-0.2
UHRF2	SE	chr9	+	6496943	6497103	6493825	6493932	6497197	6497360	1.07867e-06	-0.203
SRSF4	SE	chr1	-	29492401	29492576	29486886	29487029	29508157	29508637	1.13146e-06	-0.102
COPE	SE	chr19	-	19017768	19017915	19016384	19016438	19021779	19021880	1.16442e-06	-0.288
SSFA2	SE	chr2	+	182785323	182785377	182784022	182784173	182786674	182787139	1.19166e-06	-0.331
HMGCS1	SE	chr5	-	43307867	43307926	43298619	43299077	43313457	43313614	1.19342e-06	-0.266
TRPT1	SE	chr11	-	63991571	63991685	63991270	63991439	63991756	63991963	1.22245e-06	0.288
HIRA	SE	chr22	-	19395796	19395930	19394706	19394797	19396005	19396116	1.26995e-06	0.133
UBP1	SE	chr3	-	33438236	33438370	33437653	33437772	33438536	33438627	1.26995e-06	0.133
TMEM59	SE	chr1	-	54511364	54511459	54509045	54509198	54518672	54519111	1.29687e-06	-0.126
MAP3K10	SE	chr19	+	40711311	40711506	40711027	40711203	40711817	40712064	1.35613e-06	0.239
PDS5A	SE	chr4	-	39928394	39928481	39927455	39927553	39929580	39929784	1.40161e-06	-0.301
MKI67	SE	chr10	-	129914203	129914271	129911690	129911866	129914754	129914800	1.41361e-06	0.315
HMGCS1	SE	chr5	-	43307867	43307946	43298619	43299077	43313457	43313614	1.43041e-06	-0.241
DDX12P	SE	chr12	-	9590270	9590487	9589998	9590085	9590606	9590701	1.43658e-06	0.318
SH3YL1	SE	chr2	-	224863	224920	218135	219001	229965	230044	1.45809e-06	-0.276
NSRP1	SE	chr17	+	28445097	28445191	28443824	28443881	28499559	28499616	1.56669e-06	-0.409
FBRS	SE	chr16	+	30672624	30672654	30671563	30671763	30673740	30673789	1.73679e-06	-0.336
TRPT1	SE	chr11	-	63991571	63991634	63991270	63991439	63991756	63991963	1.93977e-06	0.302
NOL11	SE	chr17	+	65733186	65733261	65732781	65732870	65733623	65733733	2.05944e-06	-0.115
SNRPA1	SE	chr15	-	101826418	101826498	101825930	101826006	101827112	101827215	2.33976e-06	0.174
SSFA2	SE	chr2	+	182785323	182785389	182784022	182784173	182786674	182787139	2.35285e-06	-0.2
SAP30BP	SE	chr17	+	73701690	73701773	73700835	73700894	73702087	73702172	2.537e-06	-0.135
TBC1D7	SE	chr6	-	13325325	13325406	13321139	13321327	13327018	13327195	2.58847e-06	-0.283
SUV420H1	SE	chr11	-	67947598	67947667	67942484	67942650	67953247	67953395	2.70944e-06	-0.234
ABI1	SE	chr10	-	27047990	27048164	27040526	27040712	27054146	27054247	2.74186e-06	0.26
MBD1	SE	chr18	-	47799703	47799841	47799193	47799325	47799933	47800233	2.80789e-06	0.266
BCLAF1	SE	chr6	-	136590317	136590441	136589299	136589477	136590574	136590750	2.88935e-06	0.149
ATF2	SE	chr2	-	175957270	175957344	175945387	175945493	175957788	175957995	2.95142e-06	-0.156
CREB1	SE	chr2	+	208441354	208441417	208439995	208440178	208442228	208442379	2.95142e-06	-0.125
OSBPL3	SE	chr7	-	24888683	24888795	24881897	24882032	24892122	24892237	2.96812e-06	-0.38
FAM193B	SE	chr5	-	176958953	176959132	176958282	176958522	176959443	176959642	2.99078e-06	0.542
TRPT1	SE	chr11	-	63991571	63991605	63991270	63991439	63991756	63991887	3.04267e-06	0.437
MTA1	SE	chr14	+	105912003	105912189	105911754	105911848	105916394	105916521	3.04267e-06	-0.303
SP140L	SE	chr2	+	231193471	231193546	231191893	231192016	231222519	231222682	3.08913e-06	-0.344
NOL11	SE	chr17	+	65733191	65733261	65732781	65732870	65733623	65733733	3.56352e-06	-0.204
MTA1	SE	chr14	+	105912003	105912114	105911754	105911848	105916394	105916521	3.66949e-06	-0.31
MTA1	SE	chr14	+	105912003	105912112	105911754	105911848	105916394	105916521	3.66949e-06	-0.31
TTI2	SE	chr8	-	33364746	33364839	33361265	33361453	33367263	33367450	3.76681e-06	-0.312
YWHAZ	SE	chr8	-	101964156	101964353	101960823	101961128	101965496	101965623	3.79433e-06	-0.163
KIAA0226L	SE	chr13	-	46952024	46952140	46946075	46946732	46961268	46961635	3.81261e-06	-0.259
RAPGEF1	SE	chr9	-	134525515	134525671	134518625	134518804	134526196	134526336	3.92636e-06	-0.31
YWHAZ	SE	chr8	-	101964156	101964356	101960823	101961128	101965496	101965623	3.94844e-06	-0.163
BCLAF1	SE	chr6	-	136590266	136590441	136589299	136589477	136590574	136590750	3.94844e-06	0.138
UHRF2	SE	chr9	+	6496918	6497103	6493825	6493932	6497197	6497360	4.35856e-06	-0.19
RSRC2	SE	chr12	-	123005050	123005128	123003385	123003576	123005931	123005975	4.35856e-06	-0.123
BTBD10	SE	chr11	-	13466570	13466728	13443188	13443385	13484638	13484844	4.35856e-06	-0.276
CPNE1	SE	chr20	-	34220084	34220149	34219866	34219947	34220232	34220307	4.35856e-06	0.201
POLDIP3	SE	chr22	-	42997975	42998113	42995703	42995799	42998775	42999166	4.44932e-06	-0.281
RAPGEF1	SE	chr9	-	134525515	134525653	134518625	134518804	134526196	134526336	4.69178e-06	-0.305
SNHG5	SE	chr6	-	86387512	86387564	86387141	86387210	86387671	86387750	4.82346e-06	0.102
HNRNPDL	SE	chr4	-	83346628	83346820	83343716	83346036	83347189	83347281	4.92123e-06	0.121
BCLAF1	SE	chr6	-	136588166	136588302	136582402	136582615	136589299	136589477	4.92123e-06	0.245
ANKRD17	SE	chr4	-	73966827	73966890	73963789	73964237	73968092	73968264	5.3881e-06	-0.148
HIRA	SE	chr22	-	19395796	19395926	19394706	19394797	19396005	19396116	6.0448e-06	0.123
PCNXL3	SE	chr11	+	65403421	65403502	65402999	65403274	65403644	65403782	6.23943e-06	0.305
RRM1	SE	chr11	+	4148264	4148486	4147913	4148063	4150303	4150380	6.49894e-06	0.121
VEZT	SE	chr12	+	95692637	95692719	95689826	95690034	95693940	95696566	6.49894e-06	-0.169
MAGOH	SE	chr1	-	53699213	53699324	53694543	53694626	53701248	53701307	6.84259e-06	-0.199
SDHAP3	SE	chr5	-	1579391	1579584	1576293	1576424	1585098	1585248	7.18431e-06	-0.542
HNRNPDL	SE	chr4	-	83346715	83346820	83343716	83346036	83347189	83347282	7.48505e-06	0.139
ORMDL1	SE	chr2	-	190647735	190647849	190647147	190647328	190648994	190649097	8.42734e-06	-0.397
HNRNPDL	SE	chr4	-	83346718	83346820	83343716	83346036	83347189	83347282	8.52132e-06	0.119
PCNP	SE	chr3	+	101298432	101298610	101293041	101293123	101298685	101298846	8.99481e-06	0.148
IVNS1ABP	SE	chr1	-	185275616	185275757	185274667	185274775	185276145	185276271	9.26365e-06	-0.203
MBD1	SE	chr18	-	47799703	47799866	47799217	47799325	47799933	47800233	9.49065e-06	0.3
SRPK2	SE	chr7	-	104767439	104767509	104756820	104758469	104773237	104773345	9.52094e-06	-0.266
FOXM1	SE	chr12	-	2974520	2974575	2973848	2973918	2975558	2975687	9.7753e-06	-0.274
DDX42	SE	chr17	+	61852467	61852538	61851548	61851736	61864393	61864630	9.94448e-06	-0.327
UHRF2	SE	chr9	+	6496959	6497103	6493825	6493932	6497197	6497360	1.02458e-05	-0.195
SDHAP3	SE	chr5	-	1579391	1579622	1576293	1576424	1585098	1585248	1.02458e-05	-0.546
FOXM1	SE	chr12	-	2974520	2974565	2973848	2973918	2975558	2975687	1.02458e-05	-0.289
MYO9B	SE	chr19	+	17321141	17321189	17320394	17320518	17321523	17321657	1.03312e-05	-0.322
SP140L	SE	chr2	+	231193448	231193546	231191894	231192016	231222519	231222682	1.08176e-05	-0.377
MATR3	SE	chr5	+	138642927	138644016	138614739	138614818	138650363	138650425	1.11691e-05	-0.12
CLK4	SE	chr5	-	178046838	178046897	178045556	178045779	178050256	178050417	1.17183e-05	-0.267
SDHAP3	SE	chr5	-	1579391	1579599	1576293	1576424	1585098	1585248	1.25199e-05	-0.523
FGFR1OP2	SE	chr12	+	27113447	27113561	27110533	27110676	27116274	27116388	1.25596e-05	-0.176
SPTAN1	SE	chr9	+	131355261	131355321	131353755	131353904	131356453	131356652	1.29343e-05	-0.182
WHSC1	SE	chr4	+	1941380	1941505	1936870	1936989	1952798	1952930	1.37763e-05	-0.318
ZNF195	SE	chr11	-	3394806	3394886	3392806	3392933	3400267	3400452	1.43653e-05	-0.196
HNRNPM	SE	chr19	+	8538522	8538592	8536209	8536311	8539050	8539128	1.44146e-05	-0.192
WSB1	SE	chr17	+	25634769	25634944	25633807	25633908	25636125	25636298	1.44774e-05	0.237
AP1G2	SE	chr14	-	24032408	24032511	24031712	24031802	24032588	24032711	1.54231e-05	0.201
ANKRD17	SE	chr4	-	74005247	74006000	74000833	74000982	74007457	74007560	1.57618e-05	0.319
SMPD4	SE	chr2	-	130918758	130918845	130914823	130914969	130921946	130922018	1.57618e-05	-0.3
LAS1L	SE	chrX	-	64744443	64744494	64743935	64744142	64744844	64744946	1.57618e-05	0.24
NUPL1	SE	chr13	+	25883384	25883420	25881943	25882086	25887020	25887170	1.58194e-05	-0.151
GOLGA4	SE	chr3	+	37402733	37402796	37396591	37396678	37407570	37408370	1.59379e-05	-0.291
MBD1	SE	chr18	-	47799703	47799796	47799193	47799325	47799933	47800233	1.71482e-05	0.29
MZB1	SE	chr5	-	138725015	138725109	138723709	138723820	138725368	138725605	1.75699e-05	-0.513
DHX9	SE	chr1	+	182824711	182824848	182823164	182823313	182825666	182825713	1.82579e-05	0.141
DDX12P	SE	chr12	-	9590270	9590401	9589998	9590085	9590606	9590855	1.83048e-05	0.192
PLXNB1	SE	chr3	-	48447974	48448147	48447130	48447205	48448229	48448305	1.83529e-05	0.221
CPSF7	SE	chr11	-	61187393	61187566	61183576	61183991	61188861	61189025	1.89139e-05	-0.335
PTPRC	SE	chr1	+	198668692	198668833	198661475	198661502	198672426	198672500	2.07122e-05	-0.181
FBRS	SE	chr16	+	30672500	30672536	30671586	30671763	30673740	30673789	2.24993e-05	-0.296
MTMR3	SE	chr22	+	30418017	30418128	30415468	30416873	30418597	30418686	2.24993e-05	-0.337
SMARCA4	SE	chr19	+	11150133	11150229	11145589	11145808	11151982	11152236	2.32788e-05	-0.117
DGUOK	SE	chr2	+	74166036	74166149	74153952	74154179	74173845	74174015	2.3497e-05	0.279
EXOC7	SE	chr17	-	74087223	74087353	74085255	74085401	74090494	74090662	2.57836e-05	-0.299
MZB1	SE	chr5	-	138725015	138725109	138724149	138724274	138725368	138725605	2.77544e-05	-0.18
TTI2	SE	chr8	-	33364740	33364839	33361265	33361453	33367263	33367392	3.13677e-05	-0.392
TCF12	SE	chr15	+	57544618	57544690	57543547	57543621	57545459	57545666	3.25238e-05	-0.146
PPP6C	SE	chr9	-	127923119	127923185	127916184	127916264	127933363	127933459	3.34545e-05	-0.201
YIPF1	SE	chr1	-	54354916	54355136	54354579	54354659	54355385	54355487	3.3998e-05	0.385
CDC123	SE	chr10	+	12257745	12257834	12252288	12252321	12259359	12259466	3.4442e-05	-0.138
NUPL1	SE	chr13	+	25877239	25877293	25875665	25876018	25881943	25882086	3.55595e-05	-0.103
PDGFC	SE	chr4	-	157782580	157782641	157771372	157771568	157891937	157892546	3.64856e-05	-0.279
MARK2	SE	chr11	+	63675731	63675776	63672257	63672515	63676348	63678492	3.72768e-05	-0.249
WSB1	SE	chr17	+	25634769	25634933	25633807	25633908	25636125	25636298	3.92806e-05	0.228
HIRA	SE	chr22	-	19392985	19393054	19385470	19385610	19393308	19393403	3.95874e-05	0.13
MFF	SE	chr2	+	228217229	228217289	228205007	228205096	228220392	228220477	3.96813e-05	-0.156
CDC123	SE	chr10	+	12257738	12257848	12252288	12252321	12259359	12259466	4.0885e-05	-0.139
IMPDH2	SE	chr3	-	49065686	49065755	49065142	49065349	49065863	49065965	4.0885e-05	0.127
EFR3A	SE	chr8	+	133013015	133013148	133008652	133008744	133014005	133014054	4.23673e-05	0.295
MYO18B	SE	chr22	+	26349480	26349586	26348251	26348389	26351144	26351330	4.34414e-05	-0.436
SLC25A17	SE	chr22	-	41188528	41188680	41175012	41175129	41215198	41215403	4.37961e-05	-0.308
IMPDH2	SE	chr3	-	49065680	49065748	49065142	49065349	49065863	49065965	4.72518e-05	0.124
PAPSS1	SE	chr4	-	108576123	108576192	108575850	108576056	108578051	108578163	4.74699e-05	-0.107
RPAP3	SE	chr12	-	48073275	48073377	48064094	48064128	48073486	48073557	4.77825e-05	-0.262
USP10	SE	chr16	+	84808765	84808831	84806146	84806291	84812500	84813527	4.90439e-05	-0.169
PTPRC	SE	chr1	+	198663146	198663269	198661475	198661502	198668692	198668833	4.94082e-05	0.117
FAM193B	SE	chr5	-	176958953	176959201	176958282	176958522	176959443	176959642	4.94576e-05	0.458
IMPDH2	SE	chr3	-	49065631	49065755	49065142	49065349	49065863	49065965	4.94576e-05	0.128
FLNA	SE	chrX	-	153594391	153594589	153593716	153593854	153594675	153594838	5.04668e-05	0.124
CPSF7	SE	chr11	-	61187941	61188045	61183835	61183991	61188861	61189080	5.25973e-05	-0.203
GCLM	SE	chr1	-	94370078	94370144	94367140	94367225	94374593	94375154	5.33281e-05	-0.314
SAP30BP	SE	chr17	+	73701690	73701771	73700835	73700894	73702087	73702172	5.80406e-05	-0.12
GPBP1	SE	chr5	+	56517202	56517223	56509900	56510020	56526672	56526796	6.39872e-05	-0.119
YME1L1	SE	chr10	-	27431315	27431405	27425204	27425314	27434356	27434519	6.49022e-05	-0.159
WSB1	SE	chr17	+	25634769	25634945	25633807	25633908	25636125	25636298	6.5133e-05	0.223
PFDN5	SE	chr12	+	53690027	53690251	53689622	53689725	53691633	53691708	6.66004e-05	0.119
DCAF8	SE	chr1	-	160231074	160231148	160213749	160213824	160231906	160232318	6.66611e-05	-0.232
YME1L1	SE	chr10	-	27431315	27431414	27425204	27425314	27434356	27434519	6.71841e-05	-0.113
C12orf73	SE	chr12	-	104347191	104347312	104343980	104345408	104350408	104350526	6.78675e-05	-0.19
PFDN5	SE	chr12	+	53690033	53690059	53689622	53689725	53691633	53691708	7.23548e-05	0.132
PEX1	SE	chr7	-	92131203	92131393	92130820	92130987	92132354	92132509	7.42444e-05	0.266
PPHLN1	SE	chr12	+	42778741	42778798	42768664	42768876	42781257	42781337	7.58855e-05	-0.163
DCAF8	SE	chr1	-	160231074	160231140	160213749	160213824	160231906	160232318	7.76464e-05	-0.275
ZC3H13	SE	chr13	-	46550316	46550400	46549417	46549973	46553947	46554139	7.81608e-05	-0.116
PRRC2C	SE	chr1	+	171560290	171560343	171557517	171557644	171560725	171562650	7.91303e-05	-0.234
ZFAS1	SE	chr20	+	47897439	47897499	47897021	47897107	47905581	47905795	7.98237e-05	-0.112
POLG	SE	chr15	-	89863996	89864243	89862458	89862581	89864966	89865084	8.77186e-05	0.14
VPS41	SE	chr7	-	38767940	38768034	38766508	38766588	38768141	38768186	9.09254e-05	0.171
ABHD3	SE	chr18	-	19244078	19244191	19239130	19239304	19282276	19282459	9.16783e-05	-0.414
CNOT2	SE	chr12	+	70687850	70688074	70671911	70672054	70704674	70704797	9.16783e-05	-0.12
MITD1	SE	chr2	-	99789876	99789965	99787972	99788109	99790377	99790479	9.25173e-05	-0.159
CARS	SE	chr11	-	3068982	3069231	3063394	3063486	3078572	3078681	9.35499e-05	0.124
FASTK	SE	chr7	-	150773999	150774114	150773707	150773919	150774187	150774323	9.64054e-05	0.219
MTDH	SE	chr8	+	98711981	98712080	98703188	98703416	98725889	98725997	9.68775e-05	-0.132
PSMA4	SE	chr15	+	78834917	78834987	78834518	78834561	78836531	78836609	9.83858e-05	0.129
NKIRAS2	SE	chr17	+	40174587	40174658	40174416	40174490	40175671	40177656	9.93714e-05	0.302
ZC3H13	SE	chr13	-	46550346	46550400	46549417	46549973	46553947	46554139	0.00010039	-0.118
SH3YL1	SE	chr2	-	224867	224920	218135	219001	229965	230044	0.000101559	-0.204
COX20	SE	chr1	+	245005245	245005360	244998638	244999058	245005496	245005560	0.000109611	0.25
KTN1	SE	chr14	+	56130672	56130759	56128239	56128330	56133958	56134048	0.00011109	-0.163
MSL1	SE	chr17	+	38287789	38287837	38285497	38285880	38288286	38288351	0.00011429	-0.283
MZB1	SE	chr5	-	138724149	138724311	138723709	138723820	138725368	138725605	0.000116408	-0.114
PTBP1	SE	chr19	+	805491	805569	805012	805187	806407	806556	0.000116408	-0.146
PDS5A	SE	chr4	-	39928394	39928458	39927455	39927553	39929580	39929784	0.000118097	-0.425
MZB1	SE	chr5	-	138724149	138724290	138723709	138723820	138725368	138725605	0.000126016	-0.113
DOK2	SE	chr8	-	21769411	21769499	21768183	21768368	21771049	21771205	0.000133673	-0.403
MRPS18C	SE	chr4	+	84379498	84379582	84378061	84378111	84380892	84380950	0.000138815	-0.164
PNISR	SE	chr6	-	99864237	99864304	99862447	99862566	99873090	99873207	0.000140125	-0.186
EMC8	SE	chr16	-	85813984	85814079	85812230	85813473	85814816	85814876	0.000142864	0.168
ABHD3	SE	chr18	-	19263880	19263926	19239130	19239304	19282276	19282459	0.000144791	-0.457
SEPT2	SE	chr2	+	242256913	242257009	242255275	242255397	242263630	242263656	0.000146966	-0.232
NKIRAS2	SE	chr17	+	40174582	40174658	40174393	40174490	40175671	40177656	0.00014769	0.29
NGLY1	SE	chr3	-	25761620	25761682	25760434	25761126	25770623	25770809	0.000153027	0.242
RBM23	SE	chr14	-	23377541	23377589	23375403	23375577	23378691	23378804	0.000155486	-0.181
DDX12P	SE	chr12	-	9590270	9590432	9589998	9590085	9590606	9590855	0.000157901	0.172
MAGOH	SE	chr1	-	53699217	53699324	53694430	53694626	53701248	53701307	0.000162418	-0.196
ZFR	SE	chr5	-	32380180	32380278	32379220	32379316	32385613	32385755	0.000162418	-0.161
HIPK3	SE	chr11	+	33369711	33369774	33369397	33369559	33370067	33370364	0.000162418	-0.332
FGFR1OP2	SE	chr12	+	27113318	27113561	27110533	27110676	27116274	27116388	0.000162418	-0.11
GANAB	SE	chr11	-	62401781	62401847	62400916	62400986	62402292	62402472	0.000163075	-0.114
TRPT1	SE	chr11	-	63991606	63991682	63991270	63991439	63991756	63991963	0.00016329	0.309
ZFAS1	SE	chr20	+	47897439	47897501	47897021	47897107	47905581	47905795	0.000163512	-0.114
PRRC2C	SE	chr1	+	171560293	171560343	171557517	171557644	171560725	171562650	0.000164516	-0.313
SNRPA1	SE	chr15	-	101826418	101826602	101825930	101826006	101827112	101827215	0.000165004	0.3
DOK2	SE	chr8	-	21769739	21770021	21768183	21768368	21771049	21771205	0.000178027	-0.391
ZNF195	SE	chr11	-	3394806	3394905	3392806	3392933	3400267	3400452	0.000178027	-0.147
TIAL1	SE	chr10	-	121352963	121353025	121347663	121347760	121355945	121356541	0.000178855	-0.117
KDM5A	SE	chr12	-	395291	395373	389222	394828	401924	402335	0.000184611	-0.202
RFWD3	SE	chr16	-	74683029	74683100	74678438	74678633	74694829	74695349	0.000188645	-0.238
MZB1	SE	chr5	-	138724149	138724356	138723709	138723820	138725368	138725605	0.000205376	-0.106
GAS5	SE	chr1	-	173833621	173833640	173833394	173833442	173833812	173833842	0.000206733	0.109
CDC16	SE	chr13	+	115030624	115030715	115028353	115028489	115037658	115037956	0.000214998	-0.109
THAP9-AS1	SE	chr4	-	83820862	83820890	83814604	83816000	83821229	83821383	0.000232504	-0.235
DPP7	SE	chr9	-	140006324	140006481	140006141	140006206	140006563	140006682	0.000232537	0.171
MTA1	SE	chr14	+	105912003	105912189	105911754	105911848	105915695	105915746	0.00026845	-0.154
MTA1	SE	chr14	+	105912003	105912112	105911754	105911848	105915695	105915746	0.00026845	-0.154
PNISR	SE	chr6	-	99864224	99864304	99862447	99862566	99873090	99873207	0.00026845	-0.194
RCOR3	SE	chr1	+	211485696	211485829	211477424	211477482	211486061	211486076	0.00026845	0.343
CLK3	SE	chr15	+	74914460	74914557	74912349	74912566	74914834	74914901	0.00026845	0.109
NUMA1	SE	chr11	-	71723446	71723488	71721852	71721900	71723940	71727306	0.00026845	-0.14
MRPS18C	SE	chr4	+	84379477	84379582	84378061	84378111	84380892	84380950	0.00026992	-0.225
NUBP2	SE	chr16	+	1836757	1836956	1836537	1836656	1837677	1837832	0.00028283	0.29
SEPT2	SE	chr2	+	242256913	242257014	242255275	242255397	242263630	242263656	0.000299451	-0.221
FNBP4	SE	chr11	-	47747288	47747388	47746019	47746330	47752925	47753113	0.000324715	-0.309
PPHLN1	SE	chr12	+	42778701	42778798	42768664	42768876	42781257	42781337	0.000326971	-0.245
POLG	SE	chr15	-	89861169	89861268	89860606	89860767	89861771	89861980	0.000334828	-0.165
NUBP2	SE	chr16	+	1836738	1836956	1836537	1836656	1837677	1837832	0.000337318	0.326
CLK3	SE	chr15	+	74914465	74914557	74912349	74912566	74914834	74914901	0.000360909	0.183
BRD9	SE	chr5	-	883465	883565	881221	881297	884052	884185	0.000362347	-0.205
PNRC1	SE	chr6	+	89792269	89792454	89790428	89791153	89793471	89794879	0.000362406	-0.19
MZB1	SE	chr5	-	138725015	138725125	138724149	138724274	138725368	138725605	0.000374938	-0.111
TNIK	SE	chr3	-	170824971	170824995	170819237	170819422	170825853	170825951	0.000383192	-0.557
HRAS	SE	chr11	-	533276	533358	532241	532755	533452	533612	0.00038537	0.169
PDGFC	SE	chr4	-	157782580	157782637	157771372	157771568	157891937	157892546	0.00039104	-0.194
ACADVL	SE	chr17	+	7127464	7127542	7127286	7127388	7127639	7127712	0.000394803	0.125
CLK4	SE	chr5	-	178044344	178044435	178043882	178043949	178045556	178045779	0.000394901	0.282
PTPRC	SE	chr1	+	198671515	198671659	198661475	198661502	198672426	198672501	0.000396363	-0.139
CD96	SE	chr3	+	111296348	111296396	111286369	111286494	111297873	111298081	0.000408308	-0.13
AP1G2	SE	chr14	-	24035024	24035101	24034814	24034910	24035272	24035369	0.000411896	0.204
ACADVL	SE	chr17	+	7127464	7127546	7127286	7127388	7127639	7127712	0.000419811	0.125
PTPRC	SE	chr1	+	198678815	198678957	198677261	198677390	198682081	198682201	0.000422682	-0.147
RPAP3	SE	chr12	-	48073275	48073398	48064094	48064128	48073486	48073557	0.000430819	-0.336
PTPRC	SE	chr1	+	198678815	198678922	198677261	198677390	198682081	198682201	0.000445451	-0.147
WNK1	SE	chr12	+	977031	978270	971248	971436	987377	987527	0.000449227	0.3
GOLT1B	SE	chr12	+	21659818	21659910	21654698	21654882	21665228	21665310	0.000449227	-0.337
PEX5	SE	chr12	+	7354809	7354947	7354330	7354437	7355207	7355300	0.000449227	0.244
DPP7	SE	chr9	-	140006327	140006481	140006141	140006206	140006563	140006795	0.000460936	0.241
NGLY1	SE	chr3	-	25761504	25761682	25760434	25761126	25770623	25770809	0.000466834	0.171
AURKB	SE	chr17	-	8110067	8110206	8109808	8109957	8110635	8110688	0.000502688	0.266
GMFG	SE	chr19	-	39825921	39825950	39823716	39823766	39826074	39826171	0.000509789	0.2
DOK2	SE	chr8	-	21769411	21769493	21768183	21768368	21771049	21771205	0.000511276	-0.395
HPS1	SE	chr10	-	100195028	100195171	100193696	100193848	100195391	100195529	0.000512729	0.223
CDC25B	SE	chr20	+	3781389	3781512	3781108	3781145	3781617	3781740	0.000525479	0.286
PPP2R3C	SE	chr14	-	35585815	35585942	35579730	35579835	35591107	35591748	0.000552977	-0.224
BRD9	SE	chr5	-	883446	883565	881221	881297	884052	884185	0.000571505	-0.198
MED4	SE	chr13	-	48664487	48664554	48660417	48660588	48669089	48669277	0.000576003	-0.111
ITGA4	SE	chr2	+	182344863	182344993	182343483	182343551	182346324	182346410	0.000587826	-0.217
GMFG	SE	chr19	-	39825900	39825945	39823716	39823766	39826074	39826143	0.000599825	0.194
EPC1	SE	chr10	-	32561941	32562010	32560953	32561095	32562090	32562209	0.00060581	-0.157
PRRC2C	SE	chr1	+	171560290	171560339	171557517	171557644	171560725	171562650	0.000607052	-0.261
PPP2R3C	SE	chr14	-	35585815	35585943	35579730	35579835	35591107	35591748	0.000608147	-0.231
ATP2C1	SE	chr3	+	130698092	130698263	130694180	130694332	130711794	130711845	0.000608147	-0.278
PTBP1	SE	chr19	+	805512	805569	805012	805187	806407	806556	0.000621236	-0.234
GOLGA2	SE	chr9	-	131035063	131035144	131030698	131030803	131036128	131036251	0.000636058	-0.139
PPP6C	SE	chr9	-	127920519	127920661	127916184	127916264	127933363	127933459	0.000637882	-0.123
MAD2L1BP	SE	chr6	+	43603223	43603304	43600930	43601052	43604117	43604383	0.000637882	-0.1
DLEU1	SE	chr13	+	50657277	50657330	50656304	50656693	50678839	50681354	0.000693898	-0.312
PAPOLA	SE	chr14	+	97026985	97027048	97022511	97022750	97031291	97033453	0.000715556	-0.261
LARP1	SE	chr5	+	154173359	154173482	154173154	154173283	154173659	154173822	0.00072259	0.175
DPP7	SE	chr9	-	140006392	140006481	140006141	140006206	140006563	140006682	0.000725993	0.221
EMC8	SE	chr16	-	85813984	85814075	85812230	85813473	85814816	85814876	0.00076654	0.217
ZFAS1	SE	chr20	+	47897400	47897501	47897021	47897107	47905581	47905795	0.000768938	-0.104
GNAQ	SE	chr9	-	80409378	80409508	80343429	80343583	80430531	80430686	0.0007739	-0.102
BRD9	SE	chr5	-	883469	883565	881221	881297	884052	884185	0.000779659	-0.197
MON2	SE	chr12	+	62972182	62972285	62965171	62965362	62974076	62974200	0.000783354	-0.472
FAM13B	SE	chr5	-	137292165	137292231	137289854	137290065	137295304	137295444	0.000798948	-0.305
KAT2A	SE	chr17	-	40269924	40270035	40269695	40269832	40270314	40270420	0.000808328	0.115
CLK4	SE	chr5	-	178044344	178044432	178043878	178043949	178045556	178045779	0.000808328	0.359
SRSF6	SE	chr20	+	42087792	42088060	42087000	42087149	42088410	42088535	0.000830428	0.266
MCMBP	SE	chr10	-	121595051	121595216	121591523	121591612	121596407	121596541	0.000846934	-0.119
OXSR1	SE	chr3	+	38284037	38284269	38278329	38278452	38287565	38287712	0.000859831	-0.21
MECP2	SE	chrX	-	153357641	153357765	153297657	153298008	153363060	153363188	0.000878475	-0.359
PRRC2C	SE	chr1	+	171560290	171560360	171557517	171557644	171560725	171562650	0.000884491	-0.252
LARP1	SE	chr5	+	154173359	154173461	154173154	154173283	154173659	154173822	0.000886578	0.169
RAB1A	SE	chr2	-	65318116	65318212	65313987	65315824	65325104	65325200	0.000888229	-0.146
MON2	SE	chr12	+	62972224	62972285	62965171	62965362	62974076	62974200	0.00088988	-0.406
MARK2	SE	chr11	+	63673559	63673586	63672257	63672515	63676348	63678492	0.000893026	-0.424
METTL22	SE	chr16	+	8733350	8733533	8732947	8733019	8734987	8735041	0.0009056	0.17
PEX5	SE	chr12	+	7354857	7354947	7354330	7354437	7355207	7355300	0.000920148	0.238
LARP1	SE	chr5	+	154173359	154173560	154173154	154173283	154173659	154173822	0.000920148	0.117
POLG	SE	chr15	-	89861169	89861284	89860606	89860767	89861771	89861947	0.000920148	-0.117
CCNL1	SE	chr3	-	156869550	156869719	156868070	156868170	156869965	156870030	0.000924219	-0.107
OMA1	SE	chr1	-	58996272	58996401	58992932	58993007	58999624	58999732	0.000996712	-0.198
NUCB2	SE	chr11	+	17336932	17337022	17333418	17333667	17351673	17351843	0.000999706	-0.133
GMFG	SE	chr19	-	39825900	39825948	39823716	39823766	39826074	39826194	0.00102115	0.188
OXSR1	SE	chr3	+	38284233	38284269	38278329	38278452	38287565	38287712	0.00103363	-0.13
CCDC163P	SE	chr1	-	45962970	45963055	45961089	45961217	45965016	45965115	0.00103847	-0.111
DLEU1	SE	chr13	+	50657244	50657330	50656304	50656693	50678839	50681354	0.00105005	-0.316
SEC24B	SE	chr4	+	110402832	110402937	110394159	110394342	110412482	110412563	0.00112836	-0.334
RBMX2	SE	chrX	+	129543230	129543360	129537775	129537827	129545321	129545499	0.00114744	-0.109
EXOC1	SE	chr4	+	56755053	56755098	56749988	56750094	56756388	56756552	0.00114744	-0.154
MAP4K2	SE	chr11	-	64568371	64568503	64568235	64568298	64568582	64568655	0.00114897	0.332
POLG	SE	chr15	-	89861169	89861256	89860606	89860767	89861771	89861980	0.00115592	-0.118
FOXM1	SE	chr12	-	2974515	2974565	2973848	2973918	2975558	2975687	0.0011826	-0.238
MEF2D	SE	chr1	-	156446285	156446306	156444899	156445029	156446803	156446994	0.0011826	-0.167
AUH	SE	chr9	-	93979558	93979609	93976096	93976707	93983086	93983274	0.0011826	-0.509
MBD4	SE	chr3	-	129155303	129156151	129152904	129152979	129156562	129156788	0.00120367	0.143
NCOA5	SE	chr20	-	44708025	44708092	44698848	44699175	44718455	44718580	0.00121895	-0.499
TEX30	SE	chr13	-	103422361	103422436	103421660	103421891	103426031	103426171	0.00124018	-0.286
PDCD10	SE	chr3	-	167443188	167443261	167437849	167438061	167452593	167452651	0.00126553	-0.194
MORF4L2	SE	chrX	-	102939608	102939657	102933428	102933528	102940098	102940188	0.00129637	-0.178
ARFRP1	SE	chr20	-	62336985	62337143	62333487	62333569	62337708	62337791	0.00129637	-0.104
ARFRP1	SE	chr20	-	62336894	62337143	62333487	62333569	62337708	62337791	0.00131664	-0.102
ZNF384	SE	chr12	-	6787828	6787876	6787292	6787626	6788111	6788349	0.0013361	-0.236
SETD5	SE	chr3	+	9478533	9478572	9477411	9477590	9482139	9482382	0.00134621	-0.137
ARMC8	SE	chr3	+	137928658	137928735	137906089	137906441	137940767	137940839	0.00136582	-0.33
HSPH1	SE	chr13	-	31722510	31722617	31722095	31722229	31724090	31724319	0.00140743	-0.261
TCEA1	SE	chr8	-	54922989	54923052	54912504	54912610	54934622	54935016	0.00144509	-0.107
CLK4	SE	chr5	-	178049393	178049460	178045556	178045779	178050256	178050417	0.00149261	-0.193
RBM25	SE	chr14	+	73567008	73567070	73566374	73566458	73569899	73570186	0.00149332	-0.171
POLA2	SE	chr11	+	65047202	65047258	65047008	65047097	65048462	65048618	0.00153572	0.22
CDC25A	SE	chr3	-	48222210	48222330	48219343	48219478	48224418	48224520	0.00157761	-0.246
DGUOK	SE	chr2	+	74173845	74174015	74153952	74154179	74185272	74185372	0.00158097	-0.245
MAP3K10	SE	chr19	+	40711394	40711506	40711027	40711203	40711817	40712064	0.00162337	0.14
NSD1	SE	chr5	+	176674924	176675080	176673678	176673797	176675181	176675325	0.00162337	0.132
MITD1	SE	chr2	-	99789876	99789962	99787972	99788109	99790377	99790479	0.00162484	-0.125
CCNB1	SE	chr5	+	68470062	68470236	68467096	68467279	68470703	68470946	0.00164235	-0.152
MFF	SE	chr2	+	228207460	228207535	228205007	228205096	228220392	228220477	0.00166841	-0.102
ARHGEF7	SE	chr13	+	111932618	111932697	111929933	111930020	111932884	111933024	0.0017025	-0.145
RHOT2	SE	chr16	+	718487	718569	718352	718411	718655	718699	0.00173986	0.13
ZNF195	SE	chr11	-	3382972	3383119	3379156	3381795	3392204	3392300	0.00181569	-0.282
FGD3	SE	chr9	+	95782112	95782143	95780417	95780497	95782598	95782706	0.00182237	-0.125
SZRD1	SE	chr1	+	16717869	16717919	16693524	16693803	16719725	16719977	0.00188217	-0.259
LOC100630923	SE	chr7	+	102020931	102021064	102016658	102016769	102038066	102038145	0.00189109	-0.198
SRSF6	SE	chr20	+	42088001	42088060	42087000	42087149	42088410	42088535	0.00192317	0.274
FNTA	SE	chr8	+	42923879	42923982	42911441	42911689	42924697	42924802	0.00210868	-0.105
RHOC	SE	chr1	-	113247647	113247790	113246265	113246428	113249699	113250025	0.00211755	-0.283
SNUPN	SE	chr15	-	75893089	75893231	75890423	75891022	75893478	75893559	0.00211755	0.133
IKZF1	SE	chr7	+	50435703	50435763	50367233	50367353	50444230	50444491	0.00217262	-0.195
BAZ1A	SE	chr14	-	35255331	35255427	35254982	35255207	35261980	35262127	0.00220785	-0.25
RBMX2	SE	chrX	+	129543313	129543360	129537775	129537827	129545321	129545499	0.00228505	-0.234
USP16	SE	chr21	+	30418987	30419101	30415745	30415920	30419548	30419642	0.00230014	0.247
ZNF512	SE	chr2	+	27806524	27806583	27805835	27806009	27820933	27821121	0.00237664	-0.35
AP1G2	SE	chr14	-	24032408	24032491	24031712	24031802	24032588	24032711	0.00238264	0.219
TSFM	SE	chr12	+	58186768	58186856	58180822	58180945	58189959	58191370	0.00240896	-0.155
KCNAB2	SE	chr1	+	6101890	6101932	6100576	6100705	6132814	6132858	0.00240896	-0.139
PPP2R3C	SE	chr14	-	35585815	35585941	35579730	35579835	35591107	35591748	0.00240896	-0.221
TFDP2	SE	chr3	-	141772956	141772991	141724282	141724386	141811902	141811969	0.00244229	-0.11
CRAMP1L	SE	chr16	+	1716073	1716178	1715057	1715139	1716422	1716601	0.00245244	0.355
PARD3	SE	chr10	-	34661425	34661464	34648998	34649187	34663801	34663930	0.00245244	-0.225
TRA2A	SE	chr7	-	23561750	23562051	23561397	23561459	23571407	23571660	0.00245367	0.246
DCP1A	SE	chr3	-	53324814	53324874	53322082	53322301	53326098	53326857	0.00245599	-0.261
MSANTD3	SE	chr9	+	103206409	103206488	103204187	103204638	103212838	103214016	0.00248034	-0.136
PLXNB1	SE	chr3	-	48447974	48448142	48447130	48447205	48448229	48448305	0.00249516	0.145
DHX30	SE	chr3	+	47860725	47860754	47859511	47859607	47868836	47868967	0.00250157	-0.268
SLC25A17	SE	chr22	-	41195026	41195087	41175012	41175129	41215198	41215403	0.00250702	-0.34
MBD1	SE	chr18	-	47800555	47800720	47800049	47800233	47801346	47801415	0.00253523	-0.285
NUP50	SE	chr22	+	45566868	45567058	45564048	45564127	45567480	45567564	0.00265086	0.111
PTPN7	SE	chr1	-	202128408	202128469	202127245	202127429	202129672	202130716	0.00265153	-0.139
RBM23	SE	chr14	-	23377541	23377589	23375403	23375577	23388207	23388396	0.00266715	-0.482
SEPT2	SE	chr2	+	242256888	242257014	242255275	242255397	242263630	242263656	0.00269363	-0.224
KTN1	SE	chr14	+	56130672	56130762	56128247	56128330	56133958	56134048	0.00269363	-0.14
PCNXL3	SE	chr11	+	65403401	65403502	65402999	65403274	65403644	65403782	0.00276556	0.222
PTPN7	SE	chr1	-	202128408	202128544	202127245	202127429	202129672	202130716	0.0027683	-0.138
MAP3K10	SE	chr19	+	40711446	40711506	40711027	40711203	40711817	40712064	0.00278642	0.138
B3GALNT2	SE	chr1	-	235652472	235652573	235647637	235647831	235657990	235658138	0.00278642	-0.346
ZNF76	SE	chr6	+	35262556	35262688	35262232	35262346	35262920	35263764	0.00285553	0.126
NR2C2AP	SE	chr19	-	19313278	19313384	19313139	19313207	19313599	19313690	0.0028775	0.315
RPRD1A	SE	chr18	-	33620769	33620828	33613670	33613800	33647216	33647557	0.00288956	-0.105
HPS1	SE	chr10	-	100195100	100195171	100193739	100193848	100195391	100195529	0.00298616	0.301
CD1E	SE	chr1	+	158325089	158325359	158323485	158323836	158325616	158325791	0.00300362	0.176
YY1AP1	SE	chr1	-	155650206	155650247	155649199	155649303	155657861	155658447	0.00311061	-0.163
PTPN7	SE	chr1	-	202128408	202128597	202127245	202127429	202129672	202130716	0.00311486	-0.138
CASP8	SE	chr2	+	202141756	202141827	202137360	202137499	202149538	202150040	0.00315354	-0.3
DMXL1	SE	chr5	+	118514269	118514383	118513690	118513939	118525402	118525581	0.00321525	-0.148
RPL17	SE	chr18	-	47018105	47018203	47017800	47017954	47018627	47018834	0.00321525	0.258
RBBP8	SE	chr18	+	20586325	20586395	20581548	20581692	20596790	20596887	0.0032713	-0.159
MAEA	SE	chr4	+	1316168	1316291	1309184	1309388	1326544	1326653	0.0033944	-0.249
PEX5L	SE	chr3	-	179689381	179689453	179605460	179605572	179754366	179754841	0.00339815	-0.504
ENOSF1	SE	chr18	-	678695	678737	674160	674406	683245	683380	0.00345983	-0.285
KCNAB2	SE	chr1	+	6101890	6101935	6100576	6100705	6132814	6132858	0.00348231	-0.123
AGAP2	SE	chr12	-	58128354	58128462	58128101	58128187	58135694	58135944	0.00349396	-0.397
SF3A3	SE	chr1	-	38453244	38453350	38450378	38450451	38455219	38455267	0.00354813	-0.117
SCFD1	SE	chr14	+	31097414	31097485	31091459	31091605	31099682	31099771	0.00359306	-0.289
LOC339862	SE	chr3	+	18228285	18228350	18090704	18090801	18228461	18228632	0.00370604	0.129
TBCCD1	SE	chr3	-	186271303	186271392	186268917	186269068	186272042	186272157	0.00380553	-0.213
OMA1	SE	chr1	-	58996272	58996361	58992932	58993007	58999624	58999732	0.00381188	-0.275
RHOT2	SE	chr16	+	718508	718569	718352	718411	718655	718699	0.00381188	0.199
TFDP2	SE	chr3	-	141772956	141772991	141724282	141724386	141820576	141820616	0.00381443	-0.333
RHPN1	SE	chr8	+	144461998	144462155	144461494	144461678	144462231	144462345	0.00384818	0.475
LARP1	SE	chr5	+	154173404	154173560	154173154	154173283	154173659	154173822	0.00384922	0.238
MSANTD3	SE	chr9	+	103206409	103206470	103204187	103204638	103212838	103214016	0.00385423	-0.148
HSPH1	SE	chr13	-	31722510	31722568	31722095	31722229	31724090	31724319	0.00385423	-0.341
TMPO	SE	chr12	+	98938728	98938839	98931252	98931350	98940136	98940225	0.00385423	-0.173
RAB1A	SE	chr2	-	65316072	65316204	65313987	65315824	65325104	65325200	0.00385423	-0.135
SF3A3	SE	chr1	-	38453244	38453320	38450378	38450451	38455219	38455267	0.00388758	-0.117
B3GALNT2	SE	chr1	-	235652472	235652657	235647637	235647831	235657990	235658138	0.00394052	-0.408
GNB1	SE	chr1	-	1770628	1770677	1756835	1756938	1822258	1822556	0.0039413	-0.107
PPP3CB	SE	chr10	-	75199629	75199659	75196185	75198178	75204482	75204580	0.00394444	-0.289
OMA1	SE	chr1	-	58996272	58996397	58992932	58993007	58999624	58999732	0.00396203	-0.275
CNN2	SE	chr19	+	1036065	1036245	1032561	1032695	1036414	1036561	0.00400208	-0.127
RFXANK	SE	chr19	+	19307994	19308060	19307771	19307855	19308329	19308430	0.00402752	0.147
YY1AP1	SE	chr1	-	155650206	155650242	155649195	155649303	155657861	155657992	0.0040362	-0.256
PSMG1	SE	chr21	-	40551849	40551897	40550371	40550573	40552210	40552362	0.00411321	-0.269
FURIN	SE	chr15	+	91420756	91420845	91420364	91420441	91421361	91421533	0.00411821	-0.189
GPBP1L1	SE	chr1	-	46151247	46151292	46125855	46126897	46152083	46152302	0.00420314	-0.197
CELF1	SE	chr11	-	47521004	47521156	47510388	47510576	47574543	47574792	0.00424205	-0.322
CWC25	SE	chr17	-	36966528	36966653	36965954	36966018	36966720	36966848	0.00427934	0.204
PSMG1	SE	chr21	-	40551849	40551892	40550374	40550573	40552210	40552362	0.00428058	-0.279
EIF4G1	SE	chr3	+	184033276	184033333	184032282	184032462	184035108	184035285	0.00438699	-0.32
WDR45	SE	chrX	-	48932794	48932940	48932091	48932571	48933022	48933112	0.00439195	0.187
LYRM1	SE	chr16	+	20913807	20914039	20911619	20911857	20931443	20931536	0.00439195	0.468
PEX5	SE	chr12	+	7354836	7354947	7354346	7354437	7355207	7355300	0.00439195	0.239
PLXNB1	SE	chr3	-	48447974	48448123	48447130	48447205	48448229	48448305	0.00443206	0.139
KDM5A	SE	chr12	-	464323	464415	463241	463400	472128	472263	0.00453948	-0.208
SDHAP3	SE	chr5	-	1579391	1579599	1576293	1576424	1589361	1589480	0.00464171	-0.421
DBR1	SE	chr3	-	137882619	137882700	137882190	137882336	137885922	137886147	0.00468022	-0.207
THAP9-AS1	SE	chr4	-	83820865	83820890	83814604	83816000	83821229	83821376	0.00469667	-0.191
B3GALNT2	SE	chr1	-	235652472	235652550	235647637	235647831	235657990	235658138	0.00470575	-0.405
FGFR1OP	SE	chr6	+	167426995	167427055	167424300	167424381	167435896	167436119	0.00474408	-0.289
MCMBP	SE	chr10	-	121595051	121595212	121591523	121591612	121596407	121596541	0.00484488	-0.206
INPPL1	SE	chr11	+	71949085	71949219	71948167	71948840	71949306	71950188	0.00499312	0.176
ATP2C1	SE	chr3	+	130699425	130699523	130694180	130694332	130711794	130711845	0.00510388	-0.139
STAG3L5P-PVRIG2P-PILRB	SE	chr7	+	99951504	99951635	99950995	99951106	99952765	99952863	0.00518248	-0.165
ARMC10	SE	chr7	+	102737723	102737795	102727076	102727211	102738745	102740210	0.00519106	-0.149
FGFR1OP	SE	chr6	+	167426995	167427017	167424300	167424381	167435896	167436123	0.00520221	-0.336
STAG3L5P-PVRIG2P-PILRB	SE	chr7	+	99951517	99951635	99950995	99951106	99952765	99952863	0.00520338	-0.162
ACP1	SE	chr2	+	272036	272150	271865	271939	275139	275201	0.00527631	0.104
KIAA0391	SE	chr14	+	35595940	35595988	35592157	35593437	35596684	35596817	0.00536209	-0.207
SUPT20H	SE	chr13	-	37599456	37599574	37598476	37598579	37600340	37600373	0.00543568	-0.112
QTRT1	SE	chr19	+	10818175	10818291	10817977	10818056	10822836	10822975	0.00544158	0.253
TMEM126A	SE	chr11	+	85361292	85361385	85358962	85359133	85365106	85365300	0.00563924	-0.168
BRMS1	SE	chr11	-	66105713	66105748	66104803	66105360	66106191	66106256	0.00564187	-0.234
MTMR2	SE	chr11	-	95620775	95620848	95598754	95598840	95621319	95621425	0.0057115	-0.145
HIPK3	SE	chr11	+	33369668	33369774	33369397	33369559	33370067	33370364	0.00576538	-0.223
FHL2	SE	chr2	-	106013103	106013154	106002817	106002997	106015298	106015681	0.00579829	-0.295
GLYR1	SE	chr16	-	4863905	4863956	4862086	4862249	4864537	4864630	0.00580188	-0.363
TMPO	SE	chr12	+	98938007	98938127	98931252	98931350	98938728	98938839	0.00584331	0.177
CASC5	SE	chr15	+	40912837	40912936	40911156	40911209	40920267	40920406	0.00584592	-0.29
TRA2A	SE	chr7	-	23561972	23562051	23561325	23561459	23571407	23571660	0.00597825	0.228
OPA1	SE	chr3	+	193343880	193343991	193336657	193336725	193349400	193349454	0.00601122	-0.166
KHDRBS3	SE	chr8	+	136619197	136619280	136594120	136594316	136659235	136659852	0.00601122	-0.207
DDHD1	SE	chr14	-	53562834	53562936	53560033	53560162	53570400	53570574	0.00601122	-0.461
CENPU	SE	chr4	-	185623242	185623290	185618800	185618957	185631225	185631334	0.00611668	-0.289
ZNF384	SE	chr12	-	6787828	6787967	6787292	6787626	6788111	6788349	0.00614598	-0.335
FOXN2	SE	chr2	+	48555699	48555841	48541794	48541953	48573339	48573890	0.00621598	-0.49
ACIN1	SE	chr14	-	23559190	23559310	23550956	23551045	23559730	23559842	0.00636867	0.119
ZNF76	SE	chr6	+	35262556	35262692	35262232	35262346	35262920	35263764	0.00639358	0.132
CENPU	SE	chr4	-	185623516	185623595	185618800	185618957	185631225	185631334	0.00652852	-0.185
KTN1	SE	chr14	+	56130672	56130759	56128239	56128330	56137446	56137527	0.00661256	-0.159
RFWD3	SE	chr16	-	74685817	74686020	74678438	74678633	74694829	74695349	0.00661844	-0.256
SUZ12	SE	chr17	+	30310017	30310123	30303539	30303633	30315338	30315516	0.0066509	-0.116
COASY	SE	chr17	+	40716726	40716916	40716490	40716595	40717000	40717065	0.00665347	0.146
CIAPIN1	SE	chr16	-	57465062	57465178	57464169	57464251	57466398	57466472	0.00671527	-0.156
THYN1	SE	chr11	-	134118702	134118853	134118172	134118378	134119060	134119156	0.00679452	0.123
CASC5	SE	chr15	+	40938035	40938100	40937194	40937285	40939184	40939272	0.00683337	-0.607
AGAP2	SE	chr12	-	58129151	58129210	58128101	58128187	58135694	58135944	0.00704947	-0.252
EML6	SE	chr2	+	55193858	55194016	55191756	55191869	55194135	55194239	0.00706958	0.393
RFXANK	SE	chr19	+	19307994	19308145	19307771	19307855	19308329	19308430	0.00740037	0.129
DGUOK	SE	chr2	+	74177711	74177859	74173845	74174033	74185272	74185372	0.00740037	-0.132
RHOT2	SE	chr16	+	718487	718541	718352	718411	718655	718699	0.00742061	0.282
ZNF678	SE	chr1	+	227838656	227838777	227834244	227834371	227842036	227850164	0.00763435	-0.417
MIDN	SE	chr19	+	1253952	1254081	1251837	1251900	1254165	1254477	0.00764229	0.13
CHD3	SE	chr17	+	7810918	7811020	7810670	7810806	7811211	7811337	0.00777084	0.156
THAP3	SE	chr1	+	6689702	6689784	6688558	6688751	6690350	6690413	0.00777497	-0.322
RNF10	SE	chr12	+	121008993	121009094	121004627	121004783	121013433	121013491	0.00795406	-0.109
TDG	SE	chr12	+	104376913	104376996	104376576	104376712	104377072	104377167	0.0079887	-0.11
MDC1	SE	chr6	-	30675342	30676134	30675160	30675231	30679188	30679281	0.00807531	-0.276
ARMCX6	SE	chrX	-	100872496	100872574	100871656	100871756	100872874	100872991	0.00807531	-0.185
KLHL12	SE	chr1	-	202884858	202884900	202880181	202880331	202887298	202887516	0.00810003	-0.107
ELP2	SE	chr18	+	33747118	33747185	33739904	33739978	33751009	33751123	0.00811099	-0.253
CD247	SE	chr1	-	167402260	167402296	167399876	167400983	167403256	167403313	0.00814966	-0.107
JAG1	SE	chr20	-	10637045	10637106	10633115	10633246	10639115	10639370	0.00815538	0.108
TPD52L2	SE	chr20	+	62507168	62507228	62505020	62505169	62514071	62514173	0.00818136	-0.191
STAG3L5P-PVRIG2P-PILRB	SE	chr7	+	99951593	99951635	99950995	99951106	99952765	99952863	0.00821024	-0.172
ZNF384	SE	chr12	-	6787828	6787985	6787292	6787626	6788111	6788349	0.00823719	-0.33
DNMT3A	SE	chr2	-	25459804	25459874	25458575	25458694	25461998	25462084	0.00824209	-0.14
ACP1	SE	chr2	+	272036	272146	271865	271939	275139	275201	0.00826697	0.16
TRIM33	SE	chr1	-	114940561	114940612	114935398	114940482	114942078	114942231	0.00830908	-0.236
DALRD3	SE	chr3	-	49054044	49054106	49053861	49053944	49054206	49054277	0.00831967	0.169
QTRT1	SE	chr19	+	10818141	10818291	10817977	10818056	10822836	10822975	0.00839618	0.368
BTN2A1	SE	chr6	+	26463024	26463125	26459708	26460056	26463471	26463753	0.00839618	-0.109
VTA1	SE	chr6	+	142525121	142525202	142519575	142519752	142539634	142542085	0.00851308	-0.104
ZNF444	SE	chr19	+	56667129	56667283	56658258	56658577	56669862	56669971	0.00851308	-0.178
FNTA	SE	chr8	+	42919243	42919358	42911441	42911689	42924697	42924802	0.00851308	-0.273
PRRC2B	SE	chr9	+	134349840	134351922	134348920	134349111	134353130	134353336	0.00856668	-0.209
N4BP2	SE	chr4	+	40101655	40101746	40098846	40099189	40103694	40104838	0.00858282	-0.261
SYNE2	SE	chr14	+	64682003	64682072	64680911	64681188	64682965	64683105	0.00870709	-0.403
CASP8	SE	chr2	+	202141549	202141827	202137382	202137499	202149538	202150040	0.00878579	-0.214
ITCH	SE	chr20	+	33012285	33012331	33001547	33001685	33026278	33026436	0.0088589	-0.114
ZNF444	SE	chr19	+	56667129	56667342	56658258	56658577	56669862	56669971	0.00892854	-0.177
FAM193B	SE	chr5	-	176959156	176959201	176958282	176958522	176959443	176959642	0.00899951	0.459
KCTD13	SE	chr16	-	29936859	29936902	29934510	29934680	29937110	29937553	0.00899951	-0.16
ARFRP1	SE	chr20	-	62333181	62333252	62331953	62332054	62333487	62333569	0.00899951	-0.106
MBD4	SE	chr3	-	129155285	129156151	129152904	129152979	129156562	129156793	0.00900678	0.205
PDK1	SE	chr2	+	173427468	173427528	173426947	173427019	173429230	173429415	0.0090201	-0.162
PPM1M	SE	chr3	+	52280989	52281244	52280710	52280828	52281697	52281810	0.00908245	0.24
TPTEP1	SE	chr22	+	17128552	17128675	17119468	17119630	17129416	17129720	0.00909606	-0.315
CBWD5	SE	chr9	-	70461664	70461714	70457086	70457143	70463030	70463075	0.0093296	0.145
ARFRP1	SE	chr20	-	62333181	62333247	62331953	62332054	62333487	62333608	0.0094027	-0.183
FPGS	SE	chr9	+	130569270	130569391	130566914	130566979	130569487	130569565	0.0094917	-0.662
GSTM4	SE	chr1	+	110200211	110200293	110199836	110199901	110200393	110200494	0.00952366	0.142
OSBPL3	SE	chr7	-	24873705	24873867	24870386	24870524	24874104	24874355	0.00976849	-0.183
GIGYF2	SE	chr2	+	233568133	233568199	233562014	233562102	233599864	233599948	0.00980037	-0.281
OSBPL3	SE	chr7	-	24873705	24873831	24870386	24870524	24874104	24874355	0.00986355	-0.182
YY1AP1	SE	chr1	-	155650172	155650247	155649195	155649303	155657861	155657992	0.00990375	-0.289
PXYLP1	SE	chr3	+	140981084	140981182	140978964	140979096	140997183	140997342	0.0099647	-0.316
YY1AP1	SE	chr1	-	155650188	155650247	155649195	155649303	155657861	155657992	0.0100447	-0.283
NSUN2	SE	chr5	-	6622128	6622232	6620218	6620411	6623326	6623398	0.0100447	-0.112
MZB1	SE	chr5	-	138725011	138725109	138724149	138724274	138725368	138725605	0.0100447	-0.12
WDR53	SE	chr3	-	196293747	196293866	196287866	196288362	196294061	196294178	0.0100447	0.671
CHD6	SE	chr20	-	40179943	40179999	40161688	40162209	40246978	40247133	0.0100447	-0.491
PISD	SE	chr22	-	32023074	32023206	32021748	32022002	32023988	32024196	0.0100924	0.166
DEDD2	SE	chr19	-	42720831	42721197	42719299	42719404	42721783	42721944	0.0102902	-0.293
DALRD3	SE	chr3	-	49054042	49054106	49053861	49053944	49054206	49054277	0.0103499	0.256
C17orf62	SE	chr17	-	80407045	80407168	80404498	80404572	80408575	80408707	0.0103853	-0.242
KIAA0195	SE	chr17	+	73488319	73488418	73487771	73487981	73488554	73488870	0.0104018	0.31
N4BP2	SE	chr4	+	40101654	40101746	40098846	40099189	40103694	40104838	0.0105207	-0.25
SCYL1	SE	chr11	+	65305740	65305795	65305437	65305653	65305912	65306182	0.0105207	0.156
STAM	SE	chr10	+	17742189	17742278	17738773	17738868	17746429	17746517	0.0105723	-0.123
SENP5	SE	chr3	+	196650284	196650422	196630403	196630481	196656503	196656554	0.0105823	-0.286
TRIP12	SE	chr2	-	230670587	230670599	230670445	230670518	230672423	230672580	0.0107252	-0.311
ORC3	SE	chr6	+	88304244	88304331	88304070	88304125	88311501	88311599	0.0107252	-0.23
TMEM126A	SE	chr11	+	85361326	85361385	85358962	85359133	85365106	85365278	0.0108707	-0.213
SLAIN2	SE	chr4	+	48396592	48396670	48385663	48385801	48422141	48422460	0.010957	-0.185
INIP	SE	chr9	-	115478740	115478821	115456410	115456513	115480266	115480387	0.0109706	-0.215
HIRIP3	SE	chr16	-	30005226	30006164	30004960	30005129	30006423	30006538	0.0109706	0.175
PHYKPL	SE	chr5	-	177642276	177642431	177641796	177641886	177649355	177649581	0.011048	0.21
FASTK	SE	chr7	-	150773999	150774231	150773707	150773919	150774396	150774488	0.0111766	0.337
KLHL8	SE	chr4	-	88106402	88106951	88104354	88104541	88116475	88116842	0.0114499	0.372
TTC3	SE	chr21	+	38570182	38570326	38569870	38569997	38572532	38572625	0.0115632	0.21
ENO3	SE	chr17	+	4856345	4856404	4856089	4856185	4856566	4856636	0.0115937	0.164
ARHGEF7	SE	chr13	+	111862218	111862349	111806060	111806338	111870025	111870227	0.0117162	-0.189
ARFRP1	SE	chr20	-	62333181	62333250	62329994	62332054	62333487	62333569	0.0117162	-0.187
EML2	SE	chr19	-	46119718	46119816	46119059	46119147	46120022	46120111	0.0117483	0.143
ANKRD13D	SE	chr11	+	67057299	67057436	67056815	67057021	67057548	67057684	0.0117748	0.234
CHEK1	SE	chr11	+	125507343	125507439	125505323	125505428	125513686	125513795	0.011799	-0.131
RAB6A	SE	chr11	-	73429829	73429935	73390698	73390765	73431890	73431944	0.0118622	-0.143
CLASP1	SE	chr2	-	122166599	122166623	122165046	122165291	122168441	122168545	0.0118847	-0.182
PRRC2B	SE	chr9	+	134349840	134349883	134348920	134349111	134353130	134353336	0.0120525	-0.343
PFDN5	SE	chr12	+	53690237	53690335	53689622	53689725	53691633	53691708	0.0120525	0.178
SENP7	SE	chr3	-	101081973	101082043	101080558	101080705	101083677	101083835	0.0123914	-0.128
ARHGEF7	SE	chr13	+	111932618	111932787	111929933	111930020	111932884	111933024	0.0124975	-0.187
ARID4B	SE	chr1	-	235377191	235377341	235359345	235359430	235383107	235383283	0.0125374	-0.256
TRMU	SE	chr22	+	46739158	46739265	46733675	46733841	46742318	46742441	0.0125374	-0.277
NCOR2	SE	chr12	-	124858958	124859009	124856567	124857156	124862782	124862930	0.0126919	-0.386
PSMG1	SE	chr21	-	40551849	40551912	40550374	40550573	40552210	40552362	0.0127242	-0.185
ORC3	SE	chr6	+	88304259	88304331	88304070	88304125	88311501	88311599	0.0127242	-0.216
PCBP2	SE	chr12	+	53859715	53859749	53856276	53856351	53861004	53861077	0.0127598	0.131
CHD1L	SE	chr1	+	146742592	146742666	146740440	146740537	146743831	146743942	0.0127836	-0.16
DOLPP1	SE	chr9	+	131848417	131848546	131847796	131847895	131848987	131849077	0.0128034	-0.21
CPSF7	SE	chr11	-	61187420	61187566	61183835	61183991	61188861	61189025	0.0128038	-0.316
VPS13C	SE	chr15	-	62210916	62210983	62210334	62210456	62211487	62211648	0.0128038	-0.178
KHDRBS3	SE	chr8	+	136657301	136657360	136594120	136594316	136659235	136659852	0.0128176	-0.193
KLHL22	SE	chr22	-	20825746	20825802	20819144	20819863	20843271	20843531	0.0129161	-0.102
MBD1	SE	chr18	-	47800555	47800723	47799933	47800233	47801346	47801415	0.0132217	-0.248
SETD2	SE	chr3	-	47147486	47147610	47139444	47139571	47155365	47155494	0.0132217	-0.13
C16orf13	SE	chr16	-	684888	685063	684718	684797	685280	685340	0.0132272	0.206
CHD3	SE	chr17	+	7797732	7797806	7797432	7797583	7798234	7798442	0.0133543	0.158
SPG7	SE	chr16	+	89617555	89617664	89616901	89617017	89619386	89619543	0.0133962	-0.101
GPR137	SE	chr11	+	64055536	64055686	64055192	64055418	64055811	64055940	0.0135645	0.396
QRICH1	SE	chr3	-	49129829	49129889	49114141	49114471	49131344	49131504	0.0135949	-0.341
NSL1	SE	chr1	-	212912875	212912943	212899494	212912028	212955713	212955768	0.0137593	-0.209
R3HDM1	SE	chr2	+	136374237	136374327	136362375	136362586	136379063	136379178	0.0137783	-0.116
ARHGEF7	SE	chr13	+	111932618	111932715	111929933	111930020	111932884	111933024	0.0137783	-0.186
ITGAE	SE	chr17	-	3626581	3626677	3623600	3623696	3626981	3627038	0.0137798	0.186
ARFRP1	SE	chr20	-	62333181	62333302	62329994	62332054	62333487	62333569	0.013781	-0.207
FASTK	SE	chr7	-	150773999	150774114	150773707	150773919	150774396	150774488	0.0138799	0.329
RWDD3	SE	chr1	+	95709766	95710207	95699710	95699871	95712097	95712213	0.0140344	0.498
KDM4A	SE	chr1	+	44119333	44119424	44118807	44118984	44121261	44121437	0.0141034	-0.101
KDM4A	SE	chr1	+	44119333	44119451	44118807	44118984	44121261	44121437	0.0141385	-0.1
EMC1	SE	chr1	-	19570443	19570509	19570107	19570201	19571399	19571524	0.0142334	-0.122
CHD8	SE	chr14	-	21898959	21899162	21897122	21897494	21899969	21900017	0.0142538	0.386
SLC38A1	SE	chr12	-	46648596	46648719	46636982	46637097	46662647	46663208	0.0143358	-0.178
CHD1L	SE	chr1	+	146742592	146742774	146740440	146740537	146743831	146743942	0.0143593	-0.252
CCP110	SE	chr16	+	19559276	19559336	19557733	19557796	19562517	19564728	0.0144317	-0.191
RPL32P3	SE	chr3	-	129116253	129116378	129115882	129115983	129118223	129118282	0.0145719	0.166
SYNRG	SE	chr17	-	35937477	35937711	35936438	35936516	35944755	35944867	0.0149446	0.31
WAPAL	SE	chr10	-	88256957	88257058	88233634	88233730	88259474	88260500	0.0149548	-0.124
UBR7	SE	chr14	+	93678377	93678473	93676993	93677054	93681274	93681328	0.0149638	-0.124
SACM1L	SE	chr3	+	45748271	45748399	45746626	45746701	45750989	45751139	0.014964	-0.182
MACF1	SE	chr1	+	39950272	39950288	39945469	39945681	39951209	39952810	0.0150294	-0.137
PSIP1	SE	chr9	-	15479616	15479685	15478474	15478550	15486003	15486066	0.0150513	-0.102
IARS	SE	chr9	-	95017816	95017884	95014089	95014167	95018961	95019082	0.0151387	-0.212
ARMC10	SE	chr7	+	102732923	102733100	102727076	102727211	102738745	102740210	0.0151849	-0.25
HIRIP3	SE	chr16	-	30006051	30006164	30004960	30005129	30006423	30006562	0.015284	0.199
HIRIP3	SE	chr16	-	30005987	30006164	30004960	30005129	30006423	30006562	0.0153112	0.199
BORA	SE	chr13	+	73305418	73305525	73303063	73303231	73312099	73312181	0.0155284	-0.302
TIMM8B	SE	chr11	-	111956701	111957034	111955538	111956186	111957363	111957522	0.0155319	0.153
TMEM126A	SE	chr11	+	85361355	85361385	85358962	85359133	85365106	85365278	0.0155716	-0.254
SDHAP3	SE	chr5	-	1585098	1585248	1576293	1576424	1589361	1589480	0.0157897	-0.291
CLK2	SE	chr1	-	155238498	155238586	155238083	155238150	155239278	155239504	0.0159336	0.269
SMPD4	SE	chr2	-	130918663	130918845	130914823	130914969	130921946	130922018	0.0160088	-0.23
ZC3H18	SE	chr16	+	88653949	88654021	88653007	88653092	88664585	88664734	0.0160184	-0.184
TTC3	SE	chr21	+	38570182	38570317	38569870	38569997	38572532	38572625	0.0161125	0.243
LUC7L	SE	chr16	-	258599	258663	258076	258187	270647	270746	0.0162008	0.114
MTF2	SE	chr1	+	93586105	93586229	93584889	93584958	93599259	93599365	0.0162056	-0.172
ANKRD13D	SE	chr11	+	67066528	67066595	67059461	67059651	67067000	67067082	0.0162529	-0.147
C17orf62	SE	chr17	-	80405455	80405497	80404498	80404572	80408575	80408707	0.0162682	-0.191
SENP5	SE	chr3	+	196654666	196654750	196630403	196630481	196656503	196656554	0.0162682	-0.265
FIBP	SE	chr11	-	65653792	65653892	65653000	65653134	65655070	65655197	0.0162918	-0.116
LATS1	SE	chr6	-	149999817	149999881	149997690	149997873	150001010	150001593	0.0163477	-0.203
ITGB1BP1	SE	chr2	-	9547577	9547713	9545814	9547034	9548241	9548334	0.0163591	0.236
GTSE1	SE	chr22	+	46704046	46704104	46693276	46693376	46704215	46704840	0.0163591	-0.172
SUV420H1	SE	chr11	-	67946936	67947083	67942484	67942650	67953247	67953395	0.0164269	-0.382
HIRIP3	SE	chr16	-	30006067	30006164	30004960	30005129	30006423	30006538	0.0165195	0.198
SMCHD1	SE	chr18	+	2778166	2778237	2777803	2777913	2784447	2784619	0.0165195	-0.105
GAS5	SE	chr1	-	173833812	173833842	173833394	173833442	173834608	173834685	0.0166252	-0.207
KCTD20	SE	chr6	+	36411194	36411307	36410543	36410888	36437828	36438034	0.0167528	-0.147
RHOC	SE	chr1	-	113247674	113247790	113246265	113246428	113249699	113250025	0.0170278	-0.258
NARF	SE	chr17	+	80422162	80422305	80417875	80417948	80426639	80426772	0.0170278	-0.131
IKBIP	SE	chr12	-	99028073	99028191	99007181	99008118	99038300	99038829	0.0170278	-0.594
FIBP	SE	chr11	-	65653792	65653866	65652979	65653134	65655070	65655197	0.0170902	-0.115
C16orf13	SE	chr16	-	684888	684956	684718	684797	685280	685340	0.0171255	0.191
MYNN	SE	chr3	+	169491818	169491929	169490852	169491250	169492052	169492349	0.0172747	-0.242
PCBP2	SE	chr12	+	53859715	53859756	53856264	53856351	53861004	53861077	0.0174201	0.123
PAPOLA	SE	chr14	+	97029155	97029230	97022511	97022750	97031291	97033453	0.0175987	-0.196
MBNL1	SE	chr3	+	152164498	152164546	152163070	152163328	152165408	152165562	0.0178261	0.183
RGL2	SE	chr6	-	33262464	33262539	33261810	33261843	33262753	33262822	0.0179777	-0.146
SPPL2A	SE	chr15	-	51024799	51024881	51023161	51023236	51028297	51028399	0.0180163	-0.108
CPNE1	SE	chr20	-	34218662	34218715	34218360	34218412	34218822	34218956	0.0180325	0.12
SUPT20H	SE	chr13	-	37597141	37597181	37596147	37596454	37598171	37598330	0.0180733	-0.277
BANP	SE	chr16	+	88098872	88098938	88071578	88071617	88105674	88105818	0.0181279	-0.568
CENPK	SE	chr5	-	64850623	64850725	64848287	64848376	64857289	64857391	0.0181424	-0.223
QARS	SE	chr3	-	49139060	49139138	49138787	49138874	49139260	49139332	0.0181924	0.108
CLK2	SE	chr1	-	155238498	155238583	155238083	155238150	155239278	155239507	0.0182052	0.296
SELO	SE	chr22	+	50650896	50651113	50649059	50649340	50654145	50654296	0.0182779	0.158
TRIP12	SE	chr2	-	230725121	230725247	230723487	230724290	230744697	230744844	0.0184367	-0.134
BRCA1	SE	chr17	-	41247862	41247939	41243451	41246877	41251791	41251897	0.018925	-0.33
ATP5SL	SE	chr19	-	41939176	41939339	41937222	41938313	41939441	41939578	0.0189904	0.146
ZNF692	SE	chr1	-	249150486	249150621	249149923	249150145	249150712	249150761	0.0191756	0.12
ECT2	SE	chr3	+	172473272	172473365	172473084	172473164	172474772	172474955	0.0193611	-0.103
PNISR	SE	chr6	-	99851704	99851771	99850413	99850586	99852478	99852550	0.019578	-0.13
PLEKHG4	SE	chr16	+	67322072	67322303	67321800	67321917	67322391	67322505	0.0196997	0.158
LUC7L2	SE	chr7	+	139059637	139059710	139059146	139059217	139060807	139060902	0.0197887	-0.111
RWDD3	SE	chr1	+	95712097	95712213	95709766	95710271	95712311	95712781	0.0197887	-0.202
CEP57	SE	chr11	+	95555662	95555740	95555034	95555142	95560949	95561191	0.0202646	-0.173
SMARCAD1	SE	chr4	+	95187212	95187389	95185857	95186057	95191878	95191969	0.0202646	0.125
ITCH	SE	chr20	+	33012285	33012330	33001547	33001685	33026278	33026497	0.0202646	-0.264
SRSF6	SE	chr20	+	42087792	42087957	42087000	42087149	42088410	42088535	0.0205473	0.151
CENPK	SE	chr5	-	64850623	64850760	64848287	64848376	64857289	64857391	0.0206805	-0.227
PNISR	SE	chr6	-	99851704	99851854	99850415	99850586	99852478	99852578	0.0208627	-0.133
WDR53	SE	chr3	-	196293747	196293861	196287866	196288362	196294061	196294178	0.0208627	0.648
C5orf42	SE	chr5	-	37203425	37203572	37201692	37201910	37205416	37205556	0.0210308	0.324
APOPT1	SE	chr14	+	104053615	104053701	104040443	104040507	104056517	104058510	0.0210993	-0.172
DALRD3	SE	chr3	-	49054090	49054106	49053861	49053944	49054206	49054280	0.0211982	0.483
C16orf13	SE	chr16	-	684888	685012	684718	684797	685280	685340	0.0213227	0.21
MRPS10	SE	chr6	-	42181857	42181930	42179518	42179655	42182017	42182082	0.021401	0.193
CD164	SE	chr6	-	109691613	109691690	109690113	109690220	109697276	109697315	0.021401	0.116
RSU1	SE	chr10	-	16737021	16737154	16632616	16635495	16794537	16794652	0.0215588	0.109
HMMR	SE	chr5	+	162894706	162894754	162891728	162891808	162896646	162896835	0.0216449	-0.268
ERBB2IP	SE	chr5	+	65370851	65371058	65349233	65350779	65372143	65372236	0.0217299	0.123
RFWD3	SE	chr16	-	74685989	74686020	74678438	74678633	74694829	74695349	0.0219537	-0.381
KLHL2	SE	chr4	+	166242463	166242527	166238977	166239121	166243183	166244308	0.0224488	-0.205
CHID1	SE	chr11	-	893426	893519	884067	884169	899339	899401	0.0225924	-0.215
CMC2	SE	chr16	-	81014374	81014484	81009698	81010076	81030918	81031034	0.0226172	-0.302
FAM204A	SE	chr10	-	120101238	120101439	120095693	120095935	120101781	120101839	0.0227854	0.154
PPHLN1	SE	chr12	+	42745686	42745851	42729694	42729776	42748962	42749024	0.0230137	0.176
SCN3A	SE	chr2	-	166020311	166020403	166019065	166019338	166020901	166021030	0.0230308	-0.181
FGD5	SE	chr3	+	14940586	14940747	14940245	14940333	14941909	14941960	0.0231092	0.155
IFT122	SE	chr3	+	129185732	129185909	129183477	129183624	129188184	129188260	0.0232212	0.124
MORF4L2	SE	chrX	-	102939608	102939657	102930425	102931979	102940098	102940188	0.0232813	-0.234
UBTF	SE	chr17	-	42289711	42289822	42289240	42289374	42290186	42290307	0.023301	-0.111
SUV420H1	SE	chr11	-	67946936	67947004	67942484	67942650	67953247	67953395	0.0234151	-0.369
TARBP1	SE	chr1	-	234536598	234536690	234534127	234534299	234536926	234537008	0.0234454	-0.218
CENPJ	SE	chr13	-	25460406	25460523	25459743	25459808	25466780	25467007	0.0236142	-0.484
ITGB1BP1	SE	chr2	-	9547577	9547727	9545814	9547034	9548241	9548334	0.0236252	0.131
TMEM126B	SE	chr11	+	85340175	85340247	85339616	85339732	85342730	85342852	0.0236315	-0.138
IARS	SE	chr9	-	95017816	95017902	95014089	95014167	95018961	95019082	0.0236471	-0.258
ZNF197	SE	chr3	+	44672305	44672438	44670556	44671036	44672553	44672713	0.0236596	-0.335
EYA3	SE	chr1	-	28324794	28324862	28323830	28323889	28326470	28326560	0.0236596	-0.278
MBNL1	SE	chr3	+	152164492	152164546	152163070	152163328	152165408	152165562	0.0236596	0.201
TNRC6A	SE	chr16	+	24804793	24804970	24800552	24803138	24805864	24806040	0.0236596	-0.309
NT5C3A	SE	chr7	-	33075545	33075600	33066428	33066527	33102179	33102409	0.0237383	-0.232
CHD3	SE	chr17	+	7797750	7797926	7797432	7797583	7798234	7798468	0.0238538	0.121
RAD23A	SE	chr19	+	13059936	13060005	13059499	13059627	13060091	13060222	0.0238538	0.609
WAPAL	SE	chr10	-	88256957	88257094	88233634	88233730	88259474	88260500	0.024033	-0.128
ACSF2	SE	chr17	+	48541886	48541960	48541578	48541655	48548388	48548496	0.024033	-0.173
NSUN5P2	SE	chr7	-	72422690	72422834	72420596	72420735	72425163	72425302	0.0242319	-0.37
MELK	SE	chr9	+	36597218	36597287	36589534	36589649	36599390	36599483	0.0242664	-0.178
PACRGL	SE	chr4	+	20709425	20709493	20706282	20706437	20715054	20715162	0.0243463	-0.387
BOLA3	SE	chr2	-	74369398	74369487	74362527	74362785	74372315	74372430	0.0246458	-0.173
PITPNB	SE	chr22	-	28250841	28250927	28247656	28249651	28254374	28254497	0.024717	0.148
RBM48	SE	chr7	+	92163715	92164284	92161717	92161863	92166164	92166823	0.024717	0.1
PPT2-EGFL8	SE	chr6	+	32133914	32134043	32130344	32130399	32134274	32134397	0.02486	0.243
ZNF692	SE	chr1	-	249150490	249150621	249149923	249150145	249150712	249150761	0.0250514	0.176
GUSB	SE	chr7	-	65444713	65444927	65444388	65444528	65445210	65445396	0.0252848	0.151
TMEM70	SE	chr8	+	74891313	74891406	74890990	74891096	74893389	74895018	0.0252848	-0.105
MGARP	SE	chr4	-	140189825	140189919	140187316	140188195	140196442	140196546	0.0252848	-0.189
CHMP3	SE	chr2	-	86769374	86769435	86756340	86756520	86790426	86790620	0.0253188	-0.142
PREPL	SE	chr2	-	44548965	44549039	44544747	44548584	44549869	44549993	0.025363	-0.128
ZNF444	SE	chr19	+	56667129	56667221	56658258	56658577	56669862	56669971	0.0253938	-0.167
RBM48	SE	chr7	+	92165747	92165788	92163715	92164284	92166164	92166823	0.0255282	-0.115
ST7L	SE	chr1	-	113140592	113140708	113124996	113125094	113153462	113153625	0.025537	-0.222
RUFY1	SE	chr5	+	179007947	179008013	179004075	179004137	179012796	179012866	0.025537	-0.223
USP32	SE	chr17	-	58289384	58289459	58288736	58288875	58290941	58291023	0.0256838	-0.193
RFC1	SE	chr4	-	39328182	39328260	39322002	39322289	39329143	39329376	0.0259334	-0.205
UBQLN1	SE	chr9	-	86281264	86281309	86279944	86280060	86284099	86284221	0.0260591	-0.127
MYNN	SE	chr3	+	169491818	169491885	169490852	169491250	169492052	169492349	0.0261053	-0.265
RSBN1L	SE	chr7	+	77366803	77366904	77365726	77365843	77378740	77379381	0.0261785	-0.103
ZNF512	SE	chr2	+	27806524	27806772	27805835	27806009	27820933	27821121	0.0264739	-0.349
STX16	SE	chr20	+	57234617	57234690	57226308	57227143	57242545	57242653	0.0265949	-0.175
ZNF133	SE	chr20	+	18278628	18278706	18268926	18269248	18285651	18285822	0.0268461	-0.389
GUSB	SE	chr7	-	65444713	65444898	65444385	65444528	65445210	65445392	0.0270101	0.107
NR2C2	SE	chr3	+	15046050	15046120	15045364	15045493	15055095	15055296	0.0270875	-0.186
PAPOLG	SE	chr2	+	61021844	61021910	61021105	61021326	61022098	61022155	0.0271317	-0.181
PPP1R12B	SE	chr1	+	202414173	202414356	202411574	202411700	202418116	202418299	0.0272639	0.115
PCM1	SE	chr8	+	17797550	17797667	17797199	17797370	17804694	17804872	0.0275343	-0.134
PPP2R2D	SE	chr10	+	133757471	133757501	133754085	133754198	133757598	133757649	0.0277378	-0.376
PRMT3	SE	chr11	+	20414239	20414303	20413756	20413806	20414442	20414545	0.0277675	0.741
ATG9A	SE	chr2	-	220093731	220093896	220092643	220092775	220094256	220094410	0.0277675	-0.51
CD1E	SE	chr1	+	158325317	158325359	158323485	158323836	158325616	158325730	0.0277675	0.166
CEP83	SE	chr12	-	94796026	94796110	94794625	94794757	94796945	94797038	0.0277675	-0.184
RAB1A	SE	chr2	-	65318116	65318227	65316072	65316204	65325104	65325200	0.0277675	-0.105
NCOR1	SE	chr17	-	16054748	16054930	16052764	16052831	16055259	16055312	0.0278353	0.179
PXYLP1	SE	chr3	+	140953057	140953160	140951174	140951277	140978964	140978983	0.0278353	0.188
ZNF613	SE	chr19	+	52431147	52431247	52430687	52430793	52432984	52433077	0.0280531	-0.113
FAM96A	SE	chr15	-	64373300	64373350	64367690	64367736	64380885	64381050	0.0281861	-0.152
RPL23AP7	SE	chr2	-	114384457	114384499	114383185	114383306	114384614	114384715	0.0281861	-0.216
CELF2	SE	chr10	+	11308560	11308640	11299700	11299835	11312628	11312787	0.0282476	-0.135
RWDD3	SE	chr1	+	95709766	95710271	95699710	95699871	95712097	95712213	0.0282476	0.49
LCMT1	SE	chr16	+	25172422	25172509	25143722	25143844	25175918	25176039	0.0283279	-0.388
RWDD3	SE	chr1	+	95709766	95710254	95699710	95699871	95712097	95712213	0.0283654	0.441
NR2F2-AS1	SE	chr15	-	96828554	96828688	96826060	96826218	96833858	96834012	0.0286486	0.111
ZNF431	SE	chr19	+	21333881	21334001	21326353	21326446	21349137	21349264	0.0286785	0.101
ME2	SE	chr18	+	48442517	48442613	48439170	48439320	48443716	48443878	0.0287931	-0.129
CPT1B	SE	chr22	-	51012236	51012350	51011948	51012144	51012763	51012848	0.0288708	0.179
KDM4A	SE	chr1	+	44119333	44119470	44118807	44118984	44121261	44121437	0.0289261	-0.117
DENND4B	SE	chr1	-	153914662	153914832	153914344	153914589	153915031	153915101	0.0290759	0.281
ERMARD	SE	chr6	+	170173424	170173498	170169635	170169809	170176035	170176161	0.0291167	0.522
SDHAF4	SE	chr6	+	71286522	71286565	71276624	71276707	71289116	71289269	0.0291546	-0.131
IQCB1	SE	chr3	-	121547316	121547479	121544897	121545027	121547707	121547818	0.0293529	0.111
MRPS10	SE	chr6	-	42181857	42181927	42179518	42179655	42182017	42182082	0.0293529	0.234
SSBP2	SE	chr5	-	80809347	80809536	80785068	80785128	80932375	80932437	0.0293944	-0.168
HIATL1	SE	chr9	+	97203266	97203381	97200682	97200810	97207245	97207464	0.029401	-0.139
TRAK2	SE	chr2	-	202265740	202265817	202264099	202264216	202272125	202272320	0.0295294	-0.322
AKR1A1	SE	chr1	+	46018107	46018275	46016637	46016827	46027460	46027550	0.0295294	-0.107
DPY19L2	SE	chr12	-	63963003	63963129	63952692	63954442	63964537	63964637	0.0298301	0.222
CRAMP1L	SE	chr16	+	1716073	1716182	1715057	1715139	1716422	1716601	0.0300901	0.266
PPT2-EGFL8	SE	chr6	+	32133914	32134009	32130344	32130399	32134274	32134397	0.0301813	0.259
LINC01012	SE	chr6	+	27675117	27675195	27670092	27670196	27675876	27675992	0.0301935	0.119
NADK	SE	chr1	-	1685489	1685647	1685005	1685088	1685722	1685822	0.030305	0.335
NMT2	SE	chr10	-	15182985	15183028	15177272	15177417	15183420	15183556	0.0303332	-0.131
TTC3	SE	chr21	+	38570182	38570241	38569870	38569997	38572532	38572625	0.0305786	0.277
CASC5	SE	chr15	+	40912837	40917838	40911156	40911209	40920267	40920406	0.0306151	-0.156
MYO9A	SE	chr15	-	72185305	72185518	72180344	72180457	72186019	72186119	0.0306359	-0.504
CDC27	SE	chr17	-	45249286	45249379	45247282	45247408	45258927	45259003	0.0311892	-0.166
HDAC10	SE	chr22	-	50687756	50687945	50686794	50686901	50688063	50688132	0.0315535	-0.188
MDC1	SE	chr6	-	30675912	30676134	30675160	30675231	30679188	30679281	0.0315952	-0.254
EMG1	SE	chr12	+	7084390	7084516	7084251	7084310	7084857	7085165	0.0316316	-0.13
APBB3	SE	chr5	-	139941428	139941580	139941171	139941286	139941684	139941812	0.0321871	0.375
KIF14	SE	chr1	-	200588679	200588802	200586739	200587966	200589839	200589862	0.0322417	-0.501
RFWD3	SE	chr16	-	74682854	74683100	74678438	74678633	74685989	74686020	0.032469	-0.667
GTF3C5	SE	chr9	+	135930330	135930351	135930098	135930196	135931398	135931481	0.0326129	0.107
SEPT1	SE	chr16	-	30393599	30393686	30393413	30393500	30394055	30394171	0.0326302	0.256
NEIL3	SE	chr4	+	178272533	178272703	178257261	178257475	178283442	178284092	0.0328339	-0.133
ZNF107	SE	chr7	+	64139554	64139714	64126460	64126663	64151625	64151752	0.0328339	-0.256
TCF19	SE	chr6	+	31126673	31126812	31126302	31126499	31126919	31127484	0.0330881	0.15
CALCOCO1	SE	chr12	-	54106558	54106630	54104902	54105905	54106883	54106990	0.0331018	-0.205
MRPS10	SE	chr6	-	42181857	42181956	42179518	42179655	42182017	42182082	0.0333354	0.238
RPL41	SE	chr12	+	56510537	56510647	56510373	56510443	56511265	56511616	0.0335589	-0.501
VARS	SE	chr6	-	31751990	31752085	31750872	31750963	31752170	31752279	0.0336006	0.122
INPP5K	SE	chr17	-	1419181	1419412	1417165	1417273	1419749	1420182	0.0336145	0.236
USP35	SE	chr11	+	77909628	77909764	77908981	77909114	77910640	77910770	0.0336281	0.322
C11orf80	SE	chr11	+	66523823	66523976	66515849	66515988	66526513	66526567	0.0336524	0.176
SPPL2A	SE	chr15	-	51024799	51024862	51023161	51023236	51028297	51028399	0.0344378	-0.181
SRRM2	SE	chr16	+	2808988	2809055	2808470	2808548	2809140	2809173	0.0345368	0.391
SIRT2	SE	chr19	-	39389018	39389065	39384458	39384507	39390145	39390463	0.0346383	-0.192
DDX60L	SE	chr4	-	169343136	169343307	169342910	169343060	169343674	169343821	0.0346456	0.13
SLC25A17	SE	chr22	-	41175761	41175898	41175012	41175129	41215198	41215403	0.0347415	-0.212
INF2	SE	chr14	+	105181620	105181677	105180539	105181193	105185131	105185947	0.0349841	-0.289
ANKRD28	SE	chr3	-	15837540	15837610	15836729	15836813	15837902	15837953	0.0353816	0.165
NPM1	SE	chr5	+	170818308	170818428	170814707	170815010	170832305	170832407	0.0354553	-0.144
KIAA1191	SE	chr5	-	175777615	175777740	175775252	175775359	175786813	175786921	0.0355314	-0.219
CPNE1	SE	chr20	-	34246851	34246936	34220716	34220845	34252681	34252690	0.035962	-0.119
KRBA1	SE	chr7	+	149416654	149416763	149412101	149412157	149417098	149417218	0.0360983	-0.108
TRIM33	SE	chr1	-	114940561	114940631	114935398	114940482	114942078	114942231	0.0361003	-0.311
IFI16	SE	chr1	+	159019221	159019389	159002296	159002481	159021468	159021888	0.0361808	0.136
KRBA1	SE	chr7	+	149416623	149416763	149412101	149412157	149417098	149417218	0.0365258	-0.115
USP37	SE	chr2	-	219343429	219343588	219341562	219341704	219344372	219344438	0.0365835	0.153
INIP	SE	chr9	-	115478740	115478820	115456410	115456513	115480266	115480387	0.0366464	-0.312
UBE2A	SE	chrX	+	118715469	118715559	118709337	118709363	118716550	118716639	0.0370956	-0.137
PPP1R2	SE	chr3	-	195250486	195250579	195245814	195245982	195251616	195251724	0.0371673	-0.358
PHF2	SE	chr9	+	96421792	96421882	96420426	96420518	96422473	96422842	0.0376067	-0.143
ADPRHL2	SE	chr1	+	36556844	36556941	36554452	36554716	36557218	36557426	0.0376067	-0.124
CALCOCO2	SE	chr17	+	46919562	46919659	46919059	46919249	46920028	46920097	0.0379384	0.266
CCDC82	SE	chr11	-	96119417	96119457	96117125	96117925	96123007	96123083	0.0379493	-0.2
TEAD1	SE	chr11	+	12696955	12697108	12695968	12696381	12785725	12785981	0.0380482	0.453
NDUFA12	SE	chr12	-	95391083	95391186	95365103	95365396	95396514	95396597	0.0380641	-0.272
FLOT1	SE	chr6	-	30709390	30709576	30708455	30708575	30709923	30709980	0.038183	-0.324
SEC31B	SE	chr10	-	102259866	102259916	102259280	102259355	102262010	102262241	0.0384191	-0.17
TYK2	SE	chr19	-	10475289	10475447	10473229	10473333	10476192	10476574	0.0384407	0.197
POFUT2	SE	chr21	-	46702718	46702853	46702263	46702374	46703297	46703442	0.0392632	-0.134
RTCA	SE	chr1	+	100736134	100736236	100733629	100733851	100741154	100741279	0.0393572	-0.309
IST1	SE	chr16	+	71957194	71957283	71956376	71956583	71958671	71958724	0.0393662	-0.116
TMPO	SE	chr12	+	98938009	98938127	98931252	98931350	98938219	98938315	0.0393662	0.153
BRD8	SE	chr5	-	137502206	137502334	137501516	137501797	137503622	137503767	0.0393802	0.219
MMP25-AS1	SE	chr16	-	3108540	3108703	3105736	3105946	3108996	3109371	0.0393924	-0.188
CCAR1	SE	chr10	+	70516029	70516240	70515126	70515293	70517050	70517134	0.0401757	0.102
C11orf84	SE	chr11	+	63590102	63590320	63586273	63586474	63594399	63595190	0.0401757	0.104
STX16	SE	chr20	+	57234645	57234690	57226308	57227143	57242545	57242664	0.0401923	-0.185
BRCA1	SE	chr17	-	41249260	41249306	41243451	41246877	41251791	41251897	0.0403854	-0.391
SNHG16	SE	chr17	+	74555026	74555125	74553845	74553939	74557369	74557484	0.0404008	-0.171
BECN1	SE	chr17	-	40970804	40970895	40970238	40970433	40971565	40971627	0.0404314	0.131
MTX2	SE	chr2	+	177188119	177188191	177162576	177162623	177191552	177191629	0.0404396	-0.172
SERPINH1	SE	chr11	+	75274771	75274815	75273100	75273364	75277360	75278016	0.0412736	-0.199
KIF23	SE	chr15	+	69733106	69733418	69732646	69732826	69737128	69737380	0.0413934	0.313
MELK	SE	chr9	+	36594624	36594768	36589532	36589649	36599390	36599483	0.0413934	-0.327
ADRBK2	SE	chr22	+	26040558	26040632	25960860	25961120	26063705	26063767	0.041947	-0.268
APTX	SE	chr9	-	32988089	32988122	32987541	32987729	32989756	32989891	0.0419698	-0.429
RAB11FIP3	SE	chr16	+	541133	541268	538850	539000	546823	546859	0.0420029	-0.394
C1orf43	SE	chr1	-	154192311	154192436	154186932	154187050	154192817	154193273	0.0421437	-0.129
SGCB	SE	chr4	-	52897994	52898127	52895843	52896029	52899596	52899806	0.0422433	-0.141
ZNF33A	SE	chr10	+	38301225	38301278	38299577	38299711	38305798	38305943	0.0422586	-0.177
LUZP1	SE	chr1	-	23436077	23436143	23435514	23435620	23495258	23495351	0.0424983	-0.323
SPAG5	SE	chr17	-	26912551	26912671	26912336	26912429	26912881	26913003	0.0425709	0.103
USP35	SE	chr11	+	77909574	77909764	77908981	77909114	77910640	77910770	0.0428709	0.35
AP4B1	SE	chr1	-	114441746	114441974	114441339	114441423	114442525	114443022	0.0428826	0.143
ZSCAN25	SE	chr7	+	99216670	99216755	99216147	99216274	99217183	99217616	0.0431803	-0.24
TBL1XR1	SE	chr3	-	176816253	176816329	176782707	176782810	176914908	176915048	0.0431976	-0.227
C8orf44	SE	chr8	+	67588979	67589137	67579786	67579936	67589876	67590189	0.0432431	0.3
MRPL38	SE	chr17	-	73897062	73897108	73895596	73895755	73897792	73898001	0.0432938	-0.138
SETD2	SE	chr3	-	47127684	47127804	47108559	47108608	47139444	47139571	0.0433745	0.133
ANXA6	SE	chr5	-	150489313	150489400	150484805	150484864	150496687	150496741	0.0434524	-0.233
BRD8	SE	chr5	-	137502206	137502420	137501516	137501797	137503622	137503767	0.0442491	0.217
WRAP73	SE	chr1	-	3551723	3551858	3551560	3551638	3552507	3552594	0.0446272	0.134
ZNF330	SE	chr4	+	142143519	142143645	142142040	142142262	142147920	142148000	0.0446272	-0.141
FAM210A	SE	chr18	-	13671920	13671972	13663345	13666712	13681603	13682104	0.0455384	-0.384
CENPK	SE	chr5	-	64850623	64850773	64848319	64848376	64857289	64857391	0.0457079	-0.16
LUC7L	SE	chr16	-	278331	278401	277240	277335	279277	279449	0.0460187	-0.224
MAEA	SE	chr4	+	1321414	1321491	1309184	1309388	1326544	1326653	0.0460384	-0.175
PYROXD1	SE	chr12	+	21605014	21605088	21602496	21602625	21608065	21608226	0.0460384	-0.127
DCAF6	SE	chr1	+	168007608	168007726	167973770	167974031	168012262	168012378	0.046561	-0.284
MFN2	SE	chr1	+	12042026	12042171	12040237	12040541	12049221	12049400	0.0468251	-0.2
VEZT	SE	chr12	+	95650325	95650398	95645715	95645847	95656681	95656857	0.0471932	-0.409
TMEM206	SE	chr1	-	212550903	212551048	212537815	212538718	212553236	212553379	0.0472914	-0.11
TCOF1	SE	chr5	+	149771106	149771220	149769449	149769586	149771519	149771739	0.0472914	0.163
SLMAP	SE	chr3	+	57881973	57882098	57875640	57875827	57882237	57882318	0.0472914	0.122
ARPC4-TTLL3	SE	chr3	+	9874787	9874957	9870643	9871079	9876364	9878040	0.0473287	-0.211
ZDHHC5	SE	chr11	+	57464232	57464345	57463391	57463515	57466030	57466890	0.0473475	-0.11
BRD8	SE	chr5	-	137502206	137502299	137501516	137501797	137503622	137503793	0.0476782	0.213
ZNF692	SE	chr1	-	249150486	249150583	249149923	249150145	249150712	249150761	0.0480903	0.237
DGUOK	SE	chr2	+	74184251	74184367	74153952	74154179	74185272	74185372	0.0484348	-0.178
PDK1	SE	chr2	+	173427471	173427528	173426947	173427019	173429230	173429415	0.0486056	-0.112
RPL17	SE	chr18	-	47018105	47018203	47017800	47017954	47018644	47018834	0.0486056	0.194
ADCK1	SE	chr14	+	78374145	78374262	78365442	78365601	78390799	78390949	0.0488138	-0.111
DCAF6	SE	chr1	+	167992225	167992285	167973770	167974031	168012262	168012378	0.0491351	-0.427
SPNS3	SE	chr17	+	4389522	4389621	4381866	4381932	4389706	4389878	0.0491677	0.291
FRS2	SE	chr12	+	69931695	69931763	69925793	69925836	69955959	69956054	0.0492047	-0.112
LOC401320	SE	chr7	-	30591715	30591795	30587972	30590397	30601081	30601744	0.0493558	-0.655
ZDHHC7	SE	chr16	-	85022368	85022479	85015475	85015600	85023909	85024241	0.0494052	-0.112
RBM15	SE	chr1	+	110888160	110888271	110881944	110884890	110888929	110889303	0.0498867	-0.396
geneSymbol	Type	chr	strand	longExonStart_0base	longExonEnd	shortES	shortEE	flankingES	flankingEE	FDR	IncLevelDifference
HP1BP3	A3SS	chr1	-	21076259	21076468	21076259	21076375	21083658	21083749	1.14342e-09	0.145
SPAG5	A3SS	chr17	-	26910528	26910742	26910528	26910667	26910870	26911004	3.46128e-09	0.177
PCNP	A3SS	chr3	+	101298633	101298848	101298685	101298848	101293041	101293123	2.38278e-08	0.317
PNISR	A3SS	chr6	-	99851704	99851854	99851704	99851758	99852478	99852550	9.03971e-08	0.295
CLINT1	A3SS	chr5	-	157216370	157216575	157216370	157216521	157218710	157219003	4.48691e-07	0.233
GPBP1L1	A3SS	chr1	-	46120861	46121072	46120861	46120991	46124699	46124814	5.47696e-07	0.104
PIH1D1	A3SS	chr19	-	49954038	49954196	49954038	49954105	49954741	49955115	5.47696e-07	-0.232
CTNNB1	A3SS	chr3	+	41281150	41281939	41281309	41281939	41280624	41280845	6.86691e-07	0.287
SRSF1	A3SS	chr17	-	56082774	56082978	56082774	56082961	56083161	56083334	4.65358e-06	0.128
AP1G2	A3SS	chr14	-	24034327	24034551	24034327	24034408	24034814	24034910	9.00259e-06	0.192
TFDP2	A3SS	chr3	-	141692889	141693052	141692889	141693033	141697361	141697524	9.00259e-06	-0.151
TFDP2	A3SS	chr3	-	141692889	141693036	141692889	141693033	141697361	141697524	9.29495e-06	-0.163
MORF4L2	A3SS	chrX	-	102933428	102933579	102933428	102933528	102939608	102939657	1.45954e-05	0.238
DAP3	A3SS	chr1	+	155698832	155699010	155698998	155699010	155697398	155697529	2.82911e-05	0.129
RPLP0	A3SS	chr12	-	120635124	120635301	120635124	120635265	120636656	120636704	4.79776e-05	0.115
SURF4	A3SS	chr9	-	136234134	136234419	136234134	136234321	136242792	136243037	5.11121e-05	-0.102
LSS	A3SS	chr21	-	47616115	47616282	47616115	47616181	47625749	47625855	5.11121e-05	0.267
DDX12P	A3SS	chr12	-	9573983	9574142	9573983	9574087	9574413	9574561	6.63781e-05	0.402
YY1AP1	A3SS	chr1	-	155638417	155638568	155638417	155638508	155640110	155640255	7.49165e-05	0.156
EIF4A2	A3SS	chr3	+	186502217	186502302	186502220	186502302	186501360	186501428	8.64675e-05	-0.129
DDX54	A3SS	chr12	-	113594977	113596917	113594977	113596914	113599074	113599187	0.000115135	-0.44
TMX2	A3SS	chr11	+	57505307	57505498	57505384	57505498	57505079	57505140	0.000138666	0.11
SNX1	A3SS	chr15	+	64429766	64436433	64430240	64436433	64429060	64429131	0.000181833	0.241
SH2D1A	A3SS	chrX	+	123504025	123504170	123504080	123504170	123499610	123499674	0.000257914	0.125
BRD9	A3SS	chr5	-	889701	889881	889701	889762	891269	891402	0.00030326	0.266
DHX29	A3SS	chr5	-	54569120	54569254	54569120	54569205	54570441	54570559	0.000375221	0.312
SRSF10	A3SS	chr1	-	24301463	24301567	24301463	24301560	24304400	24304763	0.000502153	-0.154
DDX12P	A3SS	chr12	-	9573983	9574115	9573983	9574087	9574413	9574561	0.000630838	0.401
BLOC1S2	A3SS	chr10	-	102045853	102046089	102045853	102045970	102046361	102046469	0.000630838	0.166
RANGAP1	A3SS	chr22	-	41645732	41645932	41645732	41645821	41647010	41647113	0.000630838	0.13
GPBP1	A3SS	chr5	+	56545235	56545403	56545280	56545403	56542901	56543042	0.000739774	0.13
PCID2	A3SS	chr13	-	113831852	113832322	113831852	113832290	113832487	113832601	0.0008299	0.294
CPSF4	A3SS	chr7	+	99051588	99051759	99051663	99051759	99049990	99050063	0.00128262	0.304
ECI2	A3SS	chr6	-	4133782	4133960	4133782	4133935	4135744	4135831	0.00144804	0.137
DENND4B	A3SS	chr1	-	153912992	153913196	153912992	153913082	153913379	153913524	0.00146589	0.201
CDC27	A3SS	chr17	-	45232037	45232230	45232037	45232152	45234278	45234372	0.00201207	0.124
GAS5	A3SS	chr1	-	173833394	173833640	173833394	173833442	173833812	173833841	0.00201207	0.247
ECI2	A3SS	chr6	-	4133782	4133945	4133782	4133935	4135744	4135831	0.00201207	0.152
SRSF10	A3SS	chr1	-	24301463	24301570	24301463	24301560	24304400	24304763	0.00215424	-0.119
EIF2B1	A3SS	chr12	-	124109333	124109470	124109333	124109409	124110971	124111040	0.00378793	0.107
FAM111A	A3SS	chr11	+	58916269	58916426	58916308	58916426	58913299	58913329	0.0042585	0.374
RSRC2	A3SS	chr12	-	122992764	122992997	122992764	122992994	122995655	122995735	0.00503408	-0.181
MKNK2	A3SS	chr19	-	2037469	2039855	2037469	2037828	2040132	2040176	0.00666013	-0.242
ZAP70	A3SS	chr2	+	98350982	98351175	98351000	98351175	98350006	98350058	0.00834577	0.16
MORF4L2	A3SS	chrX	-	102933428	102933548	102933428	102933528	102939608	102939657	0.00834747	0.284
DNAJC10	A3SS	chr2	+	183604271	183605115	183605025	183605115	183600975	183601113	0.00838614	0.19
USP16	A3SS	chr21	+	30418987	30419642	30419548	30419642	30415745	30415920	0.00859496	0.248
PPAPDC1B	A3SS	chr8	-	38125414	38125590	38125414	38125478	38125888	38125922	0.0091512	0.138
PPP2R2D	A3SS	chr10	+	133757471	133757649	133757598	133757649	133754085	133754198	0.00942836	-0.301
ELF2	A3SS	chr4	-	139993019	139993193	139993019	139993157	139994607	139994721	0.00988916	0.261
B4GALT3	A3SS	chr1	-	161145597	161145885	161145597	161145864	161146223	161146369	0.0110641	-0.206
ARPC4-TTLL3	A3SS	chr3	+	9845219	9845391	9845283	9845391	9843344	9843440	0.0113473	-0.263
BRD7	A3SS	chr16	-	50354573	50354688	50354573	50354685	50355892	50355949	0.012786	-0.146
ARFRP1	A3SS	chr20	-	62331953	62332106	62331953	62332054	62333181	62333247	0.0143831	0.121
SDAD1	A3SS	chr4	-	76902524	76902698	76902524	76902623	76903085	76903190	0.0149147	0.225
DDX51	A3SS	chr12	-	132626394	132626549	132626394	132626501	132626663	132626735	0.0171821	0.255
FOXM1	A3SS	chr12	-	2973848	2973921	2973848	2973918	2975558	2975687	0.0179007	-0.212
SUGP2	A3SS	chr19	-	19104446	19104608	19104446	19104549	19105174	19105295	0.0180972	0.108
CELF1	A3SS	chr11	-	47498397	47498511	47498397	47498508	47498848	47498977	0.0192087	-0.216
OPTN	A3SS	chr10	+	13151096	13151288	13151111	13151288	13150961	13151015	0.0204741	-0.515
SCAF4	A3SS	chr21	-	33057361	33057553	33057361	33057487	33057710	33057797	0.0208279	0.186
EXOC7	A3SS	chr17	-	74087223	74087353	74087223	74087316	74090494	74090662	0.0236383	0.119
TMEM159	A3SS	chr16	+	21172298	21172599	21172405	21172599	21169697	21170067	0.0271883	0.294
MAPK8	A3SS	chr10	+	49642921	49647402	49642926	49647402	49639235	49639313	0.0288255	-0.217
THOC1	A3SS	chr18	-	225088	225271	225088	225139	225336	225403	0.0300161	0.153
MRPS31P5	A3SS	chr13	-	52744121	52744234	52744121	52744191	52745292	52745383	0.0322182	0.278
CD47	A3SS	chr3	-	107768465	107768557	107768465	107768498	107769424	107769449	0.034735	0.284
CALCOCO1	A3SS	chr12	-	54106558	54106771	54106558	54106630	54106883	54106990	0.0366138	0.406
TRIP12	A3SS	chr2	-	230670445	230670599	230670445	230670518	230672423	230672580	0.0372483	-0.142
PHC1	A3SS	chr12	+	9075228	9075384	9075252	9075384	9074196	9074346	0.0407271	0.163
CHD3	A3SS	chr17	+	7797432	7797583	7797444	7797583	7797122	7797253	0.0413344	-0.19
SZRD1	A3SS	chr1	+	16719722	16719977	16719725	16719977	16693524	16693803	0.0483542	-0.188
PLA2G6	A3SS	chr22	-	38511533	38511777	38511533	38511688	38512081	38512218	0.0491378	0.273
geneSymbol	Type	chr	strand	longExonStart_0base	longExonEnd	shortES	shortEE	flankingES	flankingEE	FDR	IncLevelDifference
SF3B2	A5SS	chr11	+	65825784	65825945	65825784	65825876	65826300	65826516	0	0.148
PCNXL4	A5SS	chr14	+	60590935	60591969	60590935	60591028	60592354	60592525	1.28952e-10	0.276
ATXN2L	A5SS	chr16	+	28847253	28847497	28847253	28847443	28848048	28848558	1.12922e-09	0.349
MARS	A5SS	chr12	+	57883685	57883841	57883685	57883754	57883989	57884079	1.7598e-09	0.101
HNRNPM	A5SS	chr19	+	8520288	8520464	8520288	8520458	8527412	8527465	2.933e-09	0.132
ATP5J2-PTCD1	A5SS	chr7	-	99063733	99063824	99063751	99063824	99057708	99057816	1.67879e-07	-0.137
MYO9B	A5SS	chr19	+	17313653	17313813	17313653	17313692	17313955	17314067	2.90142e-07	0.203
FAM208A	A5SS	chr3	-	56667071	56667994	56667926	56667994	56662519	56662642	6.48436e-06	0.403
SPECC1L	A5SS	chr22	+	24717255	24718886	24717255	24717291	24720187	24720395	2.24e-05	0.422
KLC2	A5SS	chr11	+	66030388	66030627	66030388	66030507	66031130	66031218	6.96308e-05	0.135
RSAD1	A5SS	chr17	+	48561802	48562003	48561802	48561906	48562104	48563341	7.93087e-05	0.231
BRPF1	A5SS	chr3	+	9783691	9783855	9783691	9783837	9784627	9784761	0.000110852	-0.259
DAP3	A5SS	chr1	+	155658884	155659034	155658884	155658965	155679563	155679615	0.000145164	-0.166
SETD5	A5SS	chr3	+	9516132	9516350	9516132	9516266	9516751	9516840	0.000171882	0.142
AP1G2	A5SS	chr14	-	24035024	24035369	24035272	24035369	24034814	24034910	0.000173214	0.299
CCDC14	A5SS	chr3	-	123665649	123666166	123666126	123666166	123663695	123663837	0.000220972	0.293
PFDN5	A5SS	chr12	+	53689622	53689732	53689622	53689725	53691633	53691708	0.000220972	0.211
FASTK	A5SS	chr7	-	150773999	150774231	150774187	150774231	150773707	150773919	0.000244659	0.345
SAFB2	A5SS	chr19	-	5616138	5616346	5616142	5616346	5613475	5613538	0.000328202	0.179
CHPT1	A5SS	chr12	+	102120071	102120275	102120071	102120182	102122678	102122846	0.000418357	0.248
NKIRAS2	A5SS	chr17	+	40174416	40174658	40174416	40174490	40175671	40177656	0.000485523	0.207
PPP4R3A	A5SS	chr14	-	91942154	91942310	91942193	91942310	91939582	91939714	0.000571605	-0.219
CD79A	A5SS	chr19	+	42383059	42383359	42383059	42383245	42383604	42383723	0.000649011	0.219
TTC17	A5SS	chr11	+	43418258	43418443	43418258	43418368	43418896	43419041	0.000668003	0.135
GMFG	A5SS	chr19	-	39825900	39826143	39826074	39826143	39823716	39823766	0.000687924	0.158
CASP8	A5SS	chr2	+	202141549	202141827	202141549	202141691	202149538	202149673	0.000901494	-0.223
USP15	A5SS	chr12	+	62786035	62786246	62786035	62786167	62786832	62786982	0.000928987	0.123
ENTPD4	A5SS	chr8	-	23299081	23299236	23299105	23299236	23297261	23297428	0.000928987	-0.242
MARS	A5SS	chr12	+	57909702	57909941	57909702	57909774	57910027	57910120	0.00158202	0.147
NDUFS2	A5SS	chr1	+	161183653	161183843	161183653	161183711	161183945	161184184	0.00179096	0.225
TRO	A5SS	chrX	+	54953015	54953146	54953015	54953058	54953475	54953538	0.00233785	0.293
ZNF609	A5SS	chr15	+	64791618	64792365	64791618	64791786	64915025	64915121	0.00287736	0.198
KLC1	A5SS	chr14	+	104145645	104145882	104145645	104145855	104153417	104153548	0.00507541	-0.213
STAG3L5P-PVRIG2P-PILRB	A5SS	chr7	+	99950995	99951635	99950995	99951106	99952765	99952863	0.00507541	-0.118
ANAPC16	A5SS	chr10	+	73975757	73975990	73975757	73975830	73983645	73983814	0.00527565	-0.246
EIF2B5	A5SS	chr3	+	183860839	183860989	183860839	183860930	183861229	183861353	0.0055246	0.19
ARPC4-TTLL3	A5SS	chr3	+	9874787	9874957	9874787	9874929	9876364	9878040	0.00586082	-0.421
CSNK1A1	A5SS	chr5	-	148885009	148885158	148885045	148885158	148875456	148876423	0.00586082	-0.157
DNAH10	A5SS	chr12	+	124395082	124395232	124395082	124395219	124397644	124397862	0.00723853	-0.179
CCNF	A5SS	chr16	+	2488070	2488232	2488070	2488124	2489353	2489458	0.00784126	0.14
PAPOLG	A5SS	chr2	+	60983364	60983630	60983364	60983484	60987268	60987430	0.00864094	-0.295
POLR1C	A5SS	chr6	+	43487443	43487643	43487443	43487576	43487803	43487923	0.0103614	0.184
CHST11	A5SS	chr12	+	104850691	104851307	104850691	104851292	105150726	105155792	0.0104908	-0.155
KLC1	A5SS	chr14	+	104145744	104145882	104145744	104145855	104166991	104167064	0.0106618	-0.194
ENOPH1	A5SS	chr4	+	83351632	83352066	83351632	83352037	83369072	83369174	0.0108136	0.168
FAM76B	A5SS	chr11	-	95522022	95522190	95522032	95522190	95521662	95521727	0.0108136	0.316
CHPT1	A5SS	chr12	+	102120071	102120295	102120071	102120182	102122678	102122846	0.0108136	0.221
WBSCR22	A5SS	chr7	+	73098096	73098231	73098096	73098134	73100965	73101061	0.0108881	-0.134
CNTROB	A5SS	chr17	+	7851804	7852003	7851804	7851937	7852402	7852475	0.0137027	0.255
CBWD2	A5SS	chr2	+	114214641	114214786	114214641	114214781	114218249	114218296	0.0137027	0.171
ALDH18A1	A5SS	chr10	-	97393247	97393406	97393253	97393406	97392715	97392806	0.0139402	0.209
RHOT2	A5SS	chr16	+	718357	718569	718357	718411	718655	718699	0.0150211	0.181
ADAMTSL5	A5SS	chr19	-	1507543	1507642	1507555	1507642	1507240	1507404	0.0150211	0.155
SMPD4	A5SS	chr2	-	130931082	130931229	130931086	130931229	130930359	130930468	0.017102	0.17
CDK11B	A5SS	chr1	-	1650766	1650894	1650796	1650894	1647784	1647917	0.017102	-0.2
MICAL1	A5SS	chr6	-	109767881	109767975	109767898	109767975	109767338	109767615	0.0190501	-0.157
EXOC1	A5SS	chr4	+	56719815	56720119	56719815	56719963	56724479	56724613	0.0202963	-0.406
ARID2	A5SS	chr12	+	46230523	46230774	46230523	46230606	46231103	46231200	0.0204151	-0.216
ENY2	A5SS	chr8	+	110346551	110346703	110346551	110346631	110348356	110348433	0.0206561	0.119
CCDC66	A5SS	chr3	+	56600621	56600787	56600621	56600766	56600977	56601081	0.0209817	-0.247
RPL23AP7	A5SS	chr2	-	114384457	114384715	114384614	114384715	114383185	114383306	0.0212941	-0.258
WBSCR22	A5SS	chr7	+	73098096	73098330	73098096	73098134	73100965	73101061	0.0212941	-0.145
NFATC2IP	A5SS	chr16	+	28965900	28966055	28965900	28966003	28967298	28967379	0.0213602	-0.255
C10orf2	A5SS	chr10	+	102747292	102749210	102747292	102747370	102749400	102749437	0.0215856	0.347
PIGG	A5SS	chr4	+	514844	515062	514844	515016	515448	515730	0.0226933	-0.253
PSTK	A5SS	chr10	+	124742787	124743030	124742787	124742986	124749689	124749907	0.0232704	-0.351
AHSA2	A5SS	chr2	+	61411074	61411161	61411074	61411157	61411846	61411935	0.0234208	-0.333
CPNE1	A5SS	chr20	-	34218662	34218883	34218822	34218883	34218360	34218412	0.0277796	0.105
OSBPL3	A5SS	chr7	-	24873705	24874355	24874104	24874355	24870386	24870524	0.0285045	-0.179
ZMYND8	A5SS	chr20	-	45867501	45867882	45867639	45867882	45865069	45865260	0.028696	0.19
OTUB1	A5SS	chr11	+	63764001	63764152	63764001	63764120	63764328	63764413	0.0331467	0.121
CSPP1	A5SS	chr8	+	67976602	67976773	67976602	67976761	67986477	67986586	0.0336815	0.11
UHRF2	A5SS	chr9	+	6497247	6497360	6497247	6497268	6498017	6498158	0.0346562	0.134
WDR53	A5SS	chr3	-	196293747	196294178	196294061	196294178	196287866	196288362	0.0367653	0.659
FAN1	A5SS	chr15	+	31196714	31198100	31196714	31196793	31200320	31200461	0.0381487	0.269
ANAPC16	A5SS	chr10	+	73975757	73975896	73975757	73975830	73990123	73990188	0.0390413	-0.167
PI4KA	A5SS	chr22	-	21115591	21115689	21115640	21115689	21107397	21107468	0.0390413	-0.267
IRF2BP2	A5SS	chr1	-	234744192	234745271	234744240	234745271	234740014	234743598	0.0395278	-0.144
TMEM106C	A5SS	chr12	+	48359871	48360012	48359871	48359955	48360465	48360515	0.0395761	-0.122
POMT1	A5SS	chr9	+	134385289	134385528	134385289	134385383	134385646	134385802	0.0398895	0.243
ENY2	A5SS	chr8	+	110346551	110346763	110346551	110346631	110348356	110348433	0.0416365	0.17
TUBG2	A5SS	chr17	+	40812166	40812385	40812166	40812334	40812656	40812725	0.042084	0.166
POMT1	A5SS	chr9	+	134385289	134385449	134385289	134385383	134385646	134385802	0.0428047	0.254
IKZF2	A5SS	chr2	-	213921556	213921823	213921634	213921823	213914436	213914604	0.0452402	-0.119
MCOLN2	A5SS	chr1	-	85405235	85405385	85405308	85405385	85403663	85403765	0.0467697	-0.167
ATG4B	A5SS	chr2	+	242610742	242610856	242610742	242610820	242611605	242613271	0.0476353	0.169
geneSymbol	Type	chr	strand	X1stExonStart_0base	X1stExonEnd	X2ndExonStart_0base	X2ndExonEnd	upstreamES	upstreamEE	downstreamES	downstreamEE	FDR	IncLevelDifference
HNRNPD	MXE	chr4	-	83280716	83280792	83292680	83292737	83279811	83279973	83294598	83295149	0	-0.23
HNRNPD	MXE	chr4	-	83280721	83280792	83292680	83292737	83279811	83279973	83294598	83295149	0	-0.224
HNRNPD	MXE	chr4	-	83280696	83280792	83292680	83292737	83279811	83279973	83294598	83295149	0	-0.23
HNRNPD	MXE	chr4	-	83280620	83280792	83292680	83292737	83279811	83279973	83294598	83295149	0	-0.232
OGT	MXE	chrX	+	70757678	70757922	70764416	70764485	70752911	70753186	70767756	70767873	0	0.295
HNRNPC	MXE	chr14	-	21699116	21699231	21702236	21702388	21698477	21698525	21737456	21737638	0	0.2
MYB	MXE	chr6	+	135510928	135511021	135511264	135511485	135507040	135507158	135513461	135513696	0	0.112
SRSF3	MXE	chr6	+	36566625	36566759	36567597	36568053	36564537	36564745	36568928	36568967	0	-0.214
SRSF3	MXE	chr6	+	36566625	36566758	36567597	36568053	36564537	36564745	36568928	36568967	0	-0.214
SRSF3	MXE	chr6	+	36566625	36566760	36567597	36568053	36564537	36564745	36568928	36568967	0	-0.172
SRSF3	MXE	chr6	+	36567597	36568053	36568928	36568967	36566625	36566760	36569484	36569571	0	0.135
MARCH7	MXE	chr2	+	160619387	160619504	160621136	160621185	160615736	160615846	160623794	160625094	1.68518e-09	0.187
MORF4L2	MXE	chrX	-	102933428	102933579	102939608	102939657	102930425	102931979	102940098	102940188	3.39245e-09	-0.367
ZFAS1	MXE	chr20	+	47895645	47895745	47897043	47897107	47894714	47895253	47905581	47905795	4.10887e-09	0.137
HNRNPC	MXE	chr14	-	21699116	21699231	21702236	21702388	21698477	21698525	21731469	21731495	5.68115e-09	0.105
PNKP	MXE	chr19	-	50367580	50367660	50369655	50369785	50367435	50367493	50370310	50370474	1.95825e-08	-0.471
COPE	MXE	chr19	-	19017768	19017921	19021779	19021903	19016384	19016438	19023792	19023855	4.62588e-07	0.194
HNRNPM	MXE	chr19	+	8539050	8539128	8550486	8551289	8536209	8536311	8551907	8551959	6.38873e-07	0.171
CNOT2	MXE	chr12	+	70704674	70704797	70713077	70713144	70671911	70672054	70723202	70723350	1.58211e-06	0.265
AP1G2	MXE	chr14	-	24035024	24035238	24035272	24035353	24034814	24034910	24035486	24035628	2.26094e-06	-0.211
POLDIP3	MXE	chr22	-	42995703	42995799	42997975	42998062	42992191	42992371	42998775	42999166	2.2624e-06	-0.196
BPTF	MXE	chr17	+	65962687	65962772	65971887	65972074	65960327	65960520	65978367	65980494	2.57759e-06	-0.294
COPE	MXE	chr19	-	19017768	19017921	19021779	19022025	19016384	19016438	19023792	19023855	2.58823e-06	0.184
PTPRC	MXE	chr1	+	198663146	198663269	198665840	198666038	198661475	198661502	198672426	198672501	2.79414e-06	0.313
PCNP	MXE	chr3	+	101298685	101298848	101304280	101304355	101293041	101293123	101309058	101309114	4.13026e-06	-0.12
GMFG	MXE	chr19	-	39823716	39823766	39825900	39825950	39818996	39819188	39826074	39826171	5.66819e-06	0.106
PCNP	MXE	chr3	+	101298685	101298848	101304283	101304355	101293041	101293123	101309058	101309114	5.81196e-06	-0.121
PTPRC	MXE	chr1	+	198663146	198663269	198665840	198666038	198661475	198661502	198668692	198668833	6.57743e-06	0.131
PCNP	MXE	chr3	+	101298685	101298846	101304280	101304355	101293041	101293123	101309058	101309114	9.18455e-06	-0.113
PCNP	MXE	chr3	+	101298685	101298846	101304283	101304355	101293041	101293123	101309058	101309114	1.35056e-05	-0.115
MORF4L2	MXE	chrX	-	102933426	102933579	102939608	102939657	102930425	102931979	102940098	102940188	1.35066e-05	-0.108
PIH1D1	MXE	chr19	-	49952731	49952911	49954038	49954196	49951257	49951319	49954741	49955115	1.50963e-05	-0.198
ILF2	MXE	chr1	-	153635690	153635752	153636518	153636606	153635180	153635271	153636871	153636950	1.67766e-05	0.12
MORF4L2	MXE	chrX	-	102933426	102933501	102939608	102939657	102930425	102931979	102940098	102940188	2.47274e-05	-0.129
UBE2K	MXE	chr4	+	39757276	39757359	39776453	39776553	39747371	39747430	39779979	39784410	2.81216e-05	-0.212
CDCA8	MXE	chr1	+	38158347	38158456	38161581	38161622	38158072	38158250	38164576	38164649	3.3367e-05	0.2
RCOR3	MXE	chr1	+	211477424	211477482	211485696	211485829	211469017	211469095	211486061	211486655	3.58454e-05	-0.254
WNK1	MXE	chr12	+	977031	978270	980430	980514	971248	971436	987377	987527	4.67701e-05	0.296
PAPSS1	MXE	chr4	-	108575851	108576056	108576123	108576192	108574646	108574782	108578051	108578163	4.70391e-05	-0.19
RAB6A	MXE	chr11	-	73429657	73429763	73429829	73429935	73427295	73427407	73431890	73431944	4.80864e-05	-0.164
MORF4L2	MXE	chrX	-	102933426	102933548	102939608	102939657	102930425	102931979	102940098	102940188	7.9818e-05	-0.115
GMFG	MXE	chr19	-	39825900	39825945	39826074	39826143	39823716	39823766	39826613	39826726	9.14133e-05	-0.129
LEF1	MXE	chr4	-	109002741	109002825	109004511	109004602	109000647	109000770	109010280	109010413	0.000126975	0.106
ATF2	MXE	chr2	-	175945387	175945493	175957270	175957344	175936977	175939563	175957788	175957995	0.000126975	-0.101
CARS	MXE	chr11	-	3063394	3063560	3068982	3069231	3062125	3062214	3078572	3078681	0.000126975	0.157
TBC1D7	MXE	chr6	-	13321139	13321327	13325325	13325406	13307831	13307977	13327018	13327138	0.000131505	-0.282
PNKP	MXE	chr19	-	50368383	50368683	50369655	50369785	50367580	50367660	50370310	50370474	0.000168926	-0.16
ABHD3	MXE	chr18	-	19237064	19237113	19239130	19239304	19236821	19236987	19282276	19282459	0.000203291	0.171
ANAPC16	MXE	chr10	+	73983645	73983814	73990123	73990188	73975757	73975896	73992758	73995618	0.000209742	0.302
TFDP2	MXE	chr3	-	141713861	141713983	141772956	141772991	141697361	141697524	141811902	141811969	0.000219988	-0.419
RCOR3	MXE	chr1	+	211477424	211477482	211485696	211485829	211462519	211462738	211486061	211486655	0.000243642	-0.364
KIAA0226L	MXE	chr13	-	46942867	46942950	46946075	46946732	46942176	46942384	46961268	46961635	0.000267894	0.102
UHRF2	MXE	chr9	+	6493825	6493932	6497048	6497103	6481991	6482099	6497197	6497360	0.000298276	0.255
CMC2	MXE	chr16	-	81015410	81015482	81030918	81031034	81009698	81010076	81040338	81040502	0.000307523	0.186
CARS	MXE	chr11	-	3062125	3062261	3068982	3069231	3061064	3061161	3078572	3078681	0.000307523	0.18
CARS	MXE	chr11	-	3062125	3062214	3068982	3069231	3061064	3061161	3078572	3078681	0.000307523	0.18
KIAA0226L	MXE	chr13	-	46942867	46942938	46946075	46946732	46942176	46942384	46961268	46961635	0.000466693	0.104
MTA1	MXE	chr14	+	105912003	105912114	105915695	105915746	105911754	105911848	105916394	105916521	0.000540599	-0.143
MTA1	MXE	chr14	+	105912003	105912112	105915695	105915746	105911754	105911848	105916394	105916521	0.000540599	-0.143
DDX12P	MXE	chr12	-	9573110	9573260	9573983	9574087	9572768	9572851	9574413	9574486	0.000682831	-0.292
MTA1	MXE	chr14	+	105912003	105912189	105915695	105915746	105911754	105911848	105916394	105916521	0.000846828	-0.138
MTF2	MXE	chr1	+	93592788	93592856	93594834	93595005	93586105	93586229	93599259	93599365	0.00106395	-0.175
RBM23	MXE	chr14	-	23377541	23377589	23378691	23378804	23375403	23375577	23388207	23388396	0.00109323	0.22
RWDD3	MXE	chr1	+	95709766	95710271	95712097	95712213	95699710	95699871	95712311	95712781	0.00113217	0.226
PTBP1	MXE	chr19	+	805491	805569	806407	806556	805012	805187	807868	807902	0.00113217	-0.139
KAT2A	MXE	chr17	-	40269924	40270035	40270314	40270420	40269695	40269832	40271262	40271454	0.0011427	-0.122
TFDP2	MXE	chr3	-	141713861	141713983	141811902	141811969	141697361	141697524	141820576	141820683	0.00114633	-0.131
RBM23	MXE	chr14	-	23377541	23377589	23378691	23378804	23375403	23375577	23380536	23380612	0.00127327	0.121
RAPGEF1	MXE	chr9	-	134518625	134518804	134525515	134525629	134514021	134514178	134526196	134526336	0.00159625	-0.146
FAM208A	MXE	chr3	-	56667071	56667871	56667926	56667994	56662519	56662642	56674013	56674158	0.00176992	-0.236
ZCCHC10	MXE	chr5	-	132335823	132335865	132342450	132342612	132332676	132334542	132358532	132358598	0.00188812	0.242
PHF21A	MXE	chr11	-	45967390	45967554	45967626	45967649	45959707	45959863	45970436	45970497	0.0019818	-0.165
FAM208A	MXE	chr3	-	56667071	56667871	56667926	56667994	56662519	56662642	56672733	56672793	0.0019818	-0.198
C1orf43	MXE	chr1	-	154184933	154185100	154186932	154187050	154179176	154180124	154192817	154193273	0.00234311	0.216
RBMX2	MXE	chrX	+	129537775	129537827	129543230	129543360	129535942	129536011	129545321	129545499	0.00234311	0.12
TMX2	MXE	chr11	+	57505307	57505498	57505825	57505902	57505079	57505140	57506135	57506242	0.00251731	0.114
SP100	MXE	chr2	+	231334729	231334813	231338098	231338155	231333757	231333811	231339108	231339162	0.00259562	0.253
WNK1	MXE	chr12	+	977031	978270	980430	980514	971248	971436	987380	987527	0.00293634	0.261
MAP3K10	MXE	chr19	+	40711311	40711506	40711817	40711982	40711027	40711203	40715009	40715126	0.00297469	0.248
PPHLN1	MXE	chr12	+	42781257	42781337	42787371	42787491	42768664	42768876	42792655	42792796	0.00303895	0.111
LRP12	MXE	chr8	-	105521166	105521302	105544134	105544191	105511544	105511747	105601046	105601252	0.00304076	-0.131
ZCCHC10	MXE	chr5	-	132335823	132335865	132342450	132342612	132332676	132334542	132362188	132362296	0.00337483	0.203
CD1E	MXE	chr1	+	158325089	158325359	158325616	158325730	158324166	158324463	158326287	158326381	0.00362643	0.184
PEX1	MXE	chr7	-	92132354	92132509	92134045	92134216	92130820	92130987	92135561	92135658	0.00363791	0.236
DGKZ	MXE	chr11	+	46391490	46391559	46392862	46392934	46391043	46391100	46393036	46393153	0.00375598	-0.159
SEPT2	MXE	chr2	+	242256913	242257014	242263630	242263656	242255275	242255397	242274540	242274627	0.00386721	-0.234
STAG3L5P-PVRIG2P-PILRB	MXE	chr7	+	99950995	99951106	99951517	99951635	99950619	99950746	99952765	99952863	0.00386721	0.1
DIABLO	MXE	chr12	-	122709058	122709191	122709191	122709295	122702812	122702944	122710511	122711115	0.00387379	-0.102
STAG3L5P-PVRIG2P-PILRB	MXE	chr7	+	99950995	99951106	99951538	99951635	99950619	99950746	99952765	99952863	0.00392836	0.1
SUPT20H	MXE	chr13	-	37598171	37598330	37598476	37598579	37596147	37596217	37599456	37599574	0.00392836	-0.198
SCAF11	MXE	chr12	-	46349882	46349975	46353944	46353997	46345432	46345510	46355482	46355640	0.00434631	-0.333
FOXM1	MXE	chr12	-	2974520	2974565	2975558	2975687	2973848	2973918	2977728	2977920	0.00445953	0.164
KIAA1551	MXE	chr12	+	32133811	32138891	32140172	32140256	32123122	32123290	32145311	32146043	0.00476515	0.167
BECN1	MXE	chr17	-	40966541	40966691	40967925	40968101	40962149	40962946	40970238	40970433	0.0047883	0.125
TFDP2	MXE	chr3	-	141724282	141724386	141811902	141811969	141697361	141697524	141820576	141820683	0.00481996	-0.17
MTX2	MXE	chr2	+	177194097	177194154	177195311	177195385	177193601	177193640	177202220	177202753	0.00516092	0.176
MELK	MXE	chr9	+	36589532	36589649	36597218	36597287	36581640	36581736	36599390	36599483	0.0051953	0.199
WRAP73	MXE	chr1	-	3551723	3551858	3552507	3552594	3551560	3551638	3553558	3553662	0.00548591	-0.206
DDX42	MXE	chr17	+	61852467	61852538	61864393	61864637	61851548	61851736	61869771	61869922	0.00559319	-0.289
TMX2	MXE	chr11	+	57505307	57505498	57506135	57506242	57505079	57505140	57506445	57506511	0.00559319	0.11
ILF2	MXE	chr1	-	153635690	153635752	153636518	153636604	153635180	153635271	153636871	153636950	0.00569012	0.192
PDCD10	MXE	chr3	-	167422629	167422683	167437849	167438061	167414796	167414914	167443188	167443261	0.00619995	-0.112
MBD1	MXE	chr18	-	47800555	47800723	47801346	47801415	47799933	47800233	47801498	47801615	0.00627126	0.198
TFDP2	MXE	chr3	-	141724282	141724386	141772956	141772991	141697361	141697524	141811902	141811969	0.00651554	-0.109
MBD1	MXE	chr18	-	47799933	47800233	47801346	47801415	47799193	47799325	47801498	47801615	0.00655065	0.277
DERL2	MXE	chr17	-	5383374	5383464	5388470	5388533	5374570	5378109	5389388	5389550	0.00675704	-0.297
EIF4A2	MXE	chr3	+	186502217	186502302	186502352	186502485	186501360	186501428	186502750	186502890	0.00677873	-0.12
MARCH7	MXE	chr2	+	160619390	160619504	160621136	160621185	160615736	160615846	160623794	160625094	0.00682307	0.146
DGUOK	MXE	chr2	+	74166036	74166149	74173845	74174015	74153952	74154179	74185272	74185372	0.00682307	0.251
SEPT2	MXE	chr2	+	242256913	242257009	242263630	242263656	242255275	242255397	242274540	242274627	0.00701271	-0.221
EMC8	MXE	chr16	-	85813984	85814079	85814816	85814876	85812230	85813473	85822579	85822656	0.00701271	-0.138
FASTK	MXE	chr7	-	150773999	150774114	150774396	150774488	150773707	150773919	150774707	150774867	0.0070858	-0.253
EMC8	MXE	chr16	-	85813984	85814075	85814816	85814876	85812230	85813473	85822579	85822656	0.00789892	-0.137
TFB2M	MXE	chr1	-	246711846	246711909	246719984	246720023	246703862	246704504	246727647	246727736	0.00833966	-0.516
FASTK	MXE	chr7	-	150773999	150774114	150774187	150774323	150773707	150773919	150774396	150774488	0.0094769	-0.221
HPS1	MXE	chr10	-	100193696	100193848	100195028	100195171	100190887	100191048	100195391	100195529	0.0094769	0.208
INIP	MXE	chr9	-	115456410	115456513	115478740	115478821	115448790	115449913	115480266	115480387	0.00973104	-0.276
CCDC82	MXE	chr11	-	96117125	96117925	96119417	96119457	96116432	96116637	96120693	96120777	0.00998979	-0.18
NKIRAS2	MXE	chr17	+	40173581	40173689	40174416	40174490	40172086	40172222	40175671	40177656	0.0102773	0.18
GMFG	MXE	chr19	-	39825900	39825945	39826074	39826194	39823716	39823766	39826613	39826726	0.0103851	-0.103
MTMR3	MXE	chr22	+	30413915	30414061	30415468	30416873	30412516	30412687	30418597	30418686	0.0104199	-0.275
PIGG	MXE	chr4	+	509761	509974	514844	515016	502617	502759	515448	516632	0.0111785	-0.201
SEC24B	MXE	chr4	+	110402832	110402937	110412482	110412563	110394159	110394342	110415770	110416012	0.0111785	-0.202
TFDP2	MXE	chr3	-	141724282	141724314	141772956	141772991	141713861	141713983	141811902	141811969	0.0115173	-0.114
OGT	MXE	chrX	+	70757678	70757781	70757851	70757922	70756057	70756208	70764416	70764485	0.011809	0.139
SNHG17	MXE	chr20	-	37050733	37050888	37054582	37054696	37049652	37049745	37055061	37055146	0.0120769	-0.19
LYRM1	MXE	chr16	+	20913807	20914039	20926877	20927036	20911619	20911857	20931443	20931536	0.0120769	0.145
MAP3K10	MXE	chr19	+	40711311	40711506	40711817	40712064	40711027	40711203	40715009	40715126	0.0120769	0.154
AP1G2	MXE	chr14	-	24035024	24035238	24035272	24035369	24034814	24034910	24035486	24035628	0.0124709	-0.158
MAPK14	MXE	chr6	+	36063763	36063843	36067964	36068044	36044313	36044385	36070347	36070426	0.0125151	0.112
ZC3HAV1	MXE	chr7	-	138739950	138740041	138745781	138745884	138738710	138738841	138749624	138749745	0.0127757	0.16
DALRD3	MXE	chr3	-	49054044	49054106	49054206	49054277	49053861	49053944	49054660	49054789	0.0133036	-0.162
ENO3	MXE	chr17	+	4856345	4856404	4856566	4856634	4856089	4856185	4857006	4857140	0.0133234	0.179
SLC35A1	MXE	chr6	+	88187079	88187257	88210225	88210385	88182642	88182737	88210875	88211028	0.0133942	0.234
KAT2A	MXE	chr17	-	40269924	40270035	40270314	40270499	40269695	40269832	40271262	40271454	0.013976	-0.106
RBM23	MXE	chr14	-	23377541	23377589	23380536	23380612	23375403	23375577	23388207	23388396	0.0140546	0.169
CD46	MXE	chr1	+	207941123	207941168	207956636	207956675	207940357	207940540	207958415	207958451	0.0141244	-0.161
CASP8	MXE	chr2	+	202141549	202141691	202141756	202141827	202137360	202137499	202149538	202150040	0.014209	0.201
MORF4L2	MXE	chrX	-	102933428	102933528	102939608	102939657	102930425	102931979	102940098	102940188	0.0143782	-0.176
PCBP1-AS1	MXE	chr2	-	70286774	70286812	70310669	70310766	70259264	70259387	70312678	70312756	0.0146751	0.112
DLEU2	MXE	chr13	-	50603413	50603628	50618786	50618904	50601342	50601542	50623719	50623798	0.0149667	-0.17
RWDD3	MXE	chr1	+	95709766	95710254	95712097	95712213	95699710	95699871	95712311	95712781	0.0150684	0.186
STAG3L5P-PVRIG2P-PILRB	MXE	chr7	+	99952765	99952863	99954372	99954506	99950995	99951106	99955842	99955989	0.0150684	0.125
CAMLG	MXE	chr5	+	134076752	134077213	134079676	134079742	134074169	134074482	134086448	134087850	0.0151873	0.122
CPT1B	MXE	chr22	-	51014964	51015066	51015285	51015463	51014626	51014764	51015752	51015892	0.0151873	-0.171
C10orf2	MXE	chr10	+	102749400	102749641	102750625	102750767	102747292	102747370	102752946	102754158	0.0155719	-0.274
ITSN2	MXE	chr2	-	24544682	24544749	24549528	24549550	24538000	24538093	24550920	24550984	0.0155719	0.41
BRCA1	MXE	chr17	-	41246760	41246877	41247862	41247939	41242960	41243049	41249260	41249306	0.0161035	-0.268
NUP50	MXE	chr22	+	45566868	45567058	45567480	45567564	45564048	45564127	45577166	45577248	0.0164375	0.121
ST3GAL1	MXE	chr8	-	134511377	134511432	134558016	134558169	134488520	134488843	134583935	134584183	0.0165036	0.256
HSPH1	MXE	chr13	-	31725745	31725879	31728769	31728892	31725083	31725328	31729650	31729791	0.0166996	0.142
MYO18B	MXE	chr22	+	26349480	26349586	26351144	26351330	26348251	26348389	26388328	26388459	0.016797	-0.218
TFDP2	MXE	chr3	-	141724282	141724314	141772956	141772991	141697361	141697524	141811902	141811969	0.0183284	-0.29
MELK	MXE	chr9	+	36589534	36589649	36597218	36597287	36583623	36583709	36599390	36599483	0.0183298	0.131
POLL	MXE	chr10	-	103343274	103343438	103344634	103344676	103342519	103342648	103345072	103345235	0.0188934	0.111
HIRA	MXE	chr22	-	19385470	19385610	19392985	19393054	19384309	19384470	19393308	19393403	0.0189641	0.133
SUPT20H	MXE	chr13	-	37595584	37595739	37596147	37596217	37593478	37593534	37598171	37598330	0.0191004	0.252
RTKN2	MXE	chr10	-	64005757	64005816	64022383	64022580	64000900	64000954	64028309	64028622	0.0191248	0.252
HIATL1	MXE	chr9	+	97203266	97203381	97207245	97207464	97200682	97200810	97209104	97209218	0.0192829	-0.169
TFDP2	MXE	chr3	-	141713861	141713983	141724282	141724386	141697361	141697524	141772956	141772991	0.020021	-0.177
PRKCSH	MXE	chr19	+	11558510	11558604	11559036	11559105	11558253	11558433	11559354	11559444	0.0204708	0.498
RCOR3	MXE	chr1	+	211486061	211486177	211486241	211486303	211477424	211477482	211486765	211489725	0.0225905	-0.274
CCDC136	MXE	chr7	+	128446290	128446449	128450192	128450420	128445814	128445955	128451853	128452366	0.0233819	-0.251
TFDP2	MXE	chr3	-	141713861	141713983	141820576	141820683	141697361	141697524	141868024	141868386	0.023522	-0.145
ZNF692	MXE	chr1	-	249150486	249150621	249150712	249150795	249149923	249150145	249151432	249151696	0.023522	-0.159
RNF167	MXE	chr17	+	4846156	4846236	4847852	4847914	4845871	4845959	4848009	4848517	0.0235613	-0.173
FPGS	MXE	chr9	+	130569270	130569391	130569487	130569565	130566914	130566979	130569699	130569761	0.0235613	-0.135
CD1E	MXE	chr1	+	158325616	158325895	158326287	158326381	158323485	158323836	158326517	158327343	0.0242086	-0.13
MYSM1	MXE	chr1	-	59134101	59134238	59134303	59134354	59133518	59133593	59134655	59134710	0.0242478	-0.269
THEMIS	MXE	chr6	-	128128360	128128477	128176174	128176288	128040832	128040968	128221986	128222226	0.0249198	-0.304
PCNP	MXE	chr3	+	101298633	101298848	101309058	101309114	101293041	101293123	101311470	101313281	0.0249809	0.103
STAU2	MXE	chr8	-	74529526	74529686	74600888	74601048	74527909	74528017	74659017	74659162	0.025272	0.107
KIAA1551	MXE	chr12	+	32130759	32130882	32133069	32133188	32123122	32123290	32133811	32138891	0.0255864	-0.111
PPHLN1	MXE	chr12	+	42729684	42729776	42768664	42768876	42719946	42720031	42781257	42781337	0.0255864	-0.178
EIF4E	MXE	chr4	-	99812387	99812483	99823026	99823099	99806072	99806212	99850245	99851786	0.0258599	-0.167
PPP2R3C	MXE	chr14	-	35557156	35557216	35565914	35565970	35554673	35554984	35568457	35568590	0.0267148	-0.158
HDAC7	MXE	chr12	-	48189989	48190081	48190799	48190925	48189369	48189550	48191166	48191282	0.0271791	0.152
SLC35A1	MXE	chr6	+	88187079	88187204	88210225	88210385	88182642	88182737	88210875	88211028	0.027332	0.233
NSMCE2	MXE	chr8	+	126108923	126108995	126111695	126111799	126104082	126104200	126114292	126114388	0.0279385	0.179
TAF1D	MXE	chr11	-	93473380	93473589	93474039	93474159	93472402	93472497	93474487	93474703	0.0287894	-0.5
RWDD3	MXE	chr1	+	95705332	95705465	95709766	95710271	95699710	95699871	95712311	95712781	0.0288842	-0.353
NUBP2	MXE	chr16	+	1833877	1834067	1835727	1835903	1832923	1833037	1836537	1836656	0.0288976	0.244
ZNF212	MXE	chr7	+	148948300	148948418	148949412	148949511	148947771	148947898	148949796	148949886	0.0288976	-0.417
LOC389906	MXE	chrX	-	3740414	3740621	3744641	3744770	3736482	3736541	3746546	3747433	0.0288976	-0.389
SP3	MXE	chr2	-	174779185	174779307	174782629	174782714	174777797	174777994	174783320	174783513	0.0288976	-0.214
LMNB1	MXE	chr5	+	126150861	126150939	126153521	126153644	126147464	126147590	126154613	126154834	0.0288976	0.381
KIAA1033	MXE	chr12	+	105548395	105548480	105548887	105549008	105546139	105546229	105550503	105550570	0.0288976	0.167
PACRGL	MXE	chr4	+	20703380	20703507	20703763	20703844	20702035	20702410	20706088	20706156	0.0291762	-0.2
GLRB	MXE	chr4	+	158066361	158066425	158073869	158074162	158064958	158065111	158091583	158093242	0.0302897	-0.186
FASTK	MXE	chr7	-	150773999	150774114	150774187	150774231	150773707	150773919	150774396	150774488	0.0302897	-0.153
DNAL1	MXE	chr14	+	74128689	74128745	74138244	74138300	74111577	74111745	74153961	74154088	0.0304491	0.111
N4BP2	MXE	chr4	+	40098846	40099189	40101655	40101746	40075074	40075171	40103694	40104838	0.0310999	0.255
RFXANK	MXE	chr19	+	19307994	19308060	19308329	19308430	19307771	19307855	19308915	19309041	0.0312655	0.107
RPL34	MXE	chr4	+	109543106	109543180	109543260	109543364	109541721	109541957	109543670	109543774	0.0312655	0.5
LOC339862	MXE	chr3	+	18014870	18015062	18055146	18055266	18004063	18004186	18082940	18083033	0.0312655	-0.111
ZNF692	MXE	chr1	-	249150486	249150583	249150712	249150761	249149923	249150145	249152026	249152058	0.0312655	-0.179
PGS1	MXE	chr17	+	76416294	76416404	76419272	76419376	76415626	76415806	76420141	76420740	0.0312655	0.167
KLHL28	MXE	chr14	-	45403317	45403450	45414232	45414331	45393512	45398394	45415011	45415131	0.0322491	-0.5
DNAJC10	MXE	chr2	+	183597225	183597269	183600975	183601113	183595756	183595834	183604271	183605115	0.0324361	-0.152
ACADVL	MXE	chr17	+	7125985	7126184	7126451	7126556	7125495	7125621	7126962	7127049	0.0324361	0.104
GIGYF2	MXE	chr2	+	233587263	233587368	233595831	233595968	233568133	233568199	233599864	233599948	0.033805	-0.15
RFXANK	MXE	chr19	+	19307994	19308145	19308329	19308430	19307771	19307855	19308915	19309041	0.0340012	0.104
KIF23	MXE	chr15	+	69733106	69733418	69737128	69737380	69732646	69732826	69738347	69738430	0.0340346	0.156
LINC01420	MXE	chrX	+	56825142	56825250	56837452	56837612	56758495	56758632	56843752	56844004	0.0344568	0.222
TRAPPC6B	MXE	chr14	-	39632449	39632565	39637155	39637253	39628653	39628754	39639218	39639634	0.0344568	0.367
GNAQ	MXE	chr9	-	80430531	80430686	80537076	80537261	80343429	80343583	80646015	80646365	0.0347292	-0.103
DAP3	MXE	chr1	+	155679563	155679615	155686796	155686919	155658884	155659034	155691307	155691409	0.0347292	-0.113
TRAF3IP2-AS1	MXE	chr6	+	111867180	111867276	111886337	111886485	111804674	111804868	111895823	111896005	0.0353782	-0.31
RWDD3	MXE	chr1	+	95709766	95710207	95712097	95712213	95699710	95699871	95712311	95712781	0.0353782	0.178
SYTL1	MXE	chr1	+	27677284	27677443	27677748	27677827	27676879	27676976	27677946	27678046	0.0354063	-0.209
ABHD17B	MXE	chr9	-	74501175	74501330	74521608	74521703	74489529	74489999	74525549	74526148	0.0354063	0.167
RAF1	MXE	chr3	-	12641201	12641307	12647704	12647819	12633206	12633291	12650264	12650422	0.0354063	0.167
TFDP2	MXE	chr3	-	141713861	141713983	141724282	141724386	141697361	141697524	141747420	141747507	0.0354918	-0.101
UBA1	MXE	chrX	+	47055795	47055868	47057508	47057707	47053200	47053423	47058201	47058318	0.0354918	-0.333
P4HA1	MXE	chr10	-	74803644	74803715	74804738	74804809	74790024	74790128	74806682	74806859	0.0358661	-0.126
NBPF12	MXE	chr1	+	146384513	146384612	146386297	146386465	146378601	146378873	146386537	146386679	0.0361081	0.389
NBPF12	MXE	chr1	+	146384513	146384612	146386293	146386465	146378601	146378873	146386537	146386679	0.0361081	0.389
HIRA	MXE	chr22	-	19346858	19347007	19348759	19348903	19343752	19343811	19349249	19349454	0.0361081	0.167
TP53BP2	MXE	chr1	-	224005907	224006036	224008233	224008369	224001941	224002055	224008921	224009069	0.0361081	-0.167
AP1G2	MXE	chr14	-	24033254	24033368	24033368	24033430	24032924	24033065	24033541	24033597	0.0361298	0.116
TPD52L2	MXE	chr20	+	62507168	62507228	62514071	62514173	62505020	62505169	62520542	62520591	0.0362959	-0.12
APOPT1	MXE	chr14	+	104040443	104040507	104053610	104053701	104029293	104029461	104056517	104058510	0.0365087	0.1
KIAA0226L	MXE	chr13	-	46942897	46942950	46946075	46946732	46942176	46942384	46961268	46961635	0.0371825	0.198
ZNF195	MXE	chr11	-	3383205	3383262	3383775	3383832	3382972	3383119	3392204	3392300	0.0373702	0.144
TMEM70	MXE	chr8	+	74890990	74891096	74891313	74891406	74888376	74888726	74893389	74895018	0.0373702	0.109
HIPK3	MXE	chr11	+	33369711	33369774	33370067	33370364	33369397	33369559	33370692	33370833	0.0377157	-0.134
ERCC1	MXE	chr19	-	45917220	45917292	45918118	45918242	45910590	45912983	45920078	45920155	0.0378466	-0.167
KIAA1551	MXE	chr12	+	32130764	32130882	32133069	32133188	32123122	32123290	32133811	32138891	0.0391606	-0.214
PPP6R3	MXE	chr11	+	68228834	68228914	68229094	68229168	68228185	68228295	68272612	68272717	0.0399115	0.278
CEP120	MXE	chr5	-	122738910	122739038	122739387	122739458	122734829	122734978	122748092	122748234	0.0411094	-0.167
ANXA11	MXE	chr10	-	81940696	81940892	81960965	81961149	81935862	81935911	81965098	81965328	0.0412075	0.111
PPP4R3B	MXE	chr2	-	55800754	55800913	55804450	55804492	55795329	55795499	55806814	55806917	0.041319	0.181
ABCB8	MXE	chr7	+	150725866	150726074	150729930	150730148	150725508	150725697	150730691	150731004	0.041417	0.333
ABCB8	MXE	chr7	+	150725866	150725939	150729930	150730148	150725508	150725697	150730691	150731004	0.041417	0.333
BZW2	MXE	chr7	+	16739977	16740107	16743268	16743347	16737672	16737811	16744171	16744294	0.041417	-0.333
RNF2	MXE	chr1	+	185060710	185060871	185067203	185067476	185056683	185056772	185068922	185069094	0.0414538	0.16
GIT2	MXE	chr12	-	110385060	110385309	110388971	110389121	110383064	110383154	110390896	110391039	0.0419017	0.126
NEURL4	MXE	chr17	-	7221587	7221675	7221813	7222010	7221383	7221491	7222368	7222527	0.0424484	-0.151
WDR59	MXE	chr16	-	74994517	74994642	74995081	74995171	74990372	74990508	74999670	74999720	0.0427549	-0.5
CHCHD6	MXE	chr3	+	126499182	126499273	126517785	126517858	126451920	126452065	126571489	126571573	0.0428183	-0.333
MTX2	MXE	chr2	+	177194042	177194154	177195311	177195385	177193601	177193640	177202220	177202753	0.0431828	0.167
TRA2A	MXE	chr7	-	23561750	23562051	23570799	23570889	23561325	23561459	23571407	23571660	0.043811	-0.169
SEPT8	MXE	chr5	-	132095272	132095416	132095628	132095743	132091695	132094516	132096493	132096684	0.0447238	-0.222
LSM7	MXE	chr19	-	2324740	2324911	2325978	2326200	2324123	2324195	2328385	2328476	0.0454428	-0.125
CHD1L	MXE	chr1	+	146742592	146742666	146743831	146744009	146740440	146740537	146747016	146747131	0.0470947	-0.173
PUS3	MXE	chr11	-	125765564	125765684	125765801	125766225	125763379	125764181	125773064	125773116	0.0470947	0.228
VRK3	MXE	chr19	-	50491628	50491749	50492895	50493028	50484961	50485445	50496116	50496209	0.0470947	-0.154
PQLC1	MXE	chr18	-	77679183	77679400	77693968	77694022	77662419	77664183	77703328	77703462	0.0470947	-0.226
LOC728323	MXE	chr2	+	243064437	243064606	243080914	243081039	243061115	243061208	243101494	243101644	0.0470947	0.28
POLL	MXE	chr10	-	103343264	103343438	103347002	103347139	103340004	103340173	103347960	103348027	0.0470947	-0.167
RANBP3	MXE	chr19	-	5927978	5928098	5957928	5957984	5921211	5921332	5978071	5978320	0.0471835	-0.136
ANKRD13D	MXE	chr11	+	67059538	67059651	67066528	67066595	67059073	67059217	67067000	67067082	0.0472797	0.162
ANKRD13D	MXE	chr11	+	67059467	67059651	67066528	67066595	67059073	67059217	67067000	67067082	0.0472797	0.16
OGFOD3	MXE	chr17	-	80369330	80369406	80373281	80373503	80364293	80364358	80376287	80376513	0.0472797	-0.278
CREM	MXE	chr10	+	35468061	35468204	35477127	35477303	35415768	35416121	35490378	35490414	0.0476775	0.167
LINC00339	MXE	chr1	+	22353906	22354027	22355020	22355153	22351996	22352136	22356772	22357717	0.0476775	-0.167
ZUFSP	MXE	chr6	-	116968621	116968773	116972739	116972803	116966876	116967097	116973166	116973355	0.0476775	0.3
DDX46	MXE	chr5	+	134124905	134124954	134125795	134125912	134124202	134124281	134126159	134126242	0.0476775	-0.202
LYRM1	MXE	chr16	+	20913807	20914039	20926877	20927036	20911987	20912211	20931443	20931536	0.0476775	0.138
NDUFB1	MXE	chr14	-	92583857	92583963	92587539	92587757	92582467	92582573	92587985	92588153	0.0478798	-0.722
LDLRAD4	MXE	chr18	+	13464989	13465110	13583827	13584048	13438242	13438383	13621115	13621270	0.0478931	-0.139
ZNF18	MXE	chr17	-	11896818	11896971	11898874	11898996	11895759	11896228	11900126	11900427	0.0480479	0.167
FAM208B	MXE	chr10	+	5756097	5756170	5762222	5762360	5754785	5754881	5762506	5762631	0.0490749	-0.25
WIPF1	MXE	chr2	-	175490548	175490688	175494393	175494596	175450250	175450339	175499245	175499307	0.049692	0.361
geneSymbol	Type	chr	strand	riExonStart_0base	riExonEnd	upstreamES	upstreamEE	downstreamES	downstreamEE	FDR	IncLevelDifference
CDK17	RI	chr12	-	96672038	96674663	96672038	96674057	96674585	96674663	0	0.436
SRSF1	RI	chr17	-	56078279	56083334	56078279	56082961	56083161	56083334	0	0.316
SRSF2	RI	chr17	-	74730196	74732546	74730196	74731240	74732235	74732546	0	0.246
ATXN2L	RI	chr16	+	28847253	28848558	28847253	28847443	28848048	28848558	2.05172e-11	0.217
FAM96B	RI	chr16	-	66967889	66968326	66967889	66967967	66968123	66968326	1.61226e-07	-0.143
LUC7L3	RI	chr17	+	48827861	48830072	48827861	48828055	48829560	48830072	1.94722e-07	0.155
GSTK1	RI	chr7	+	142962084	142962389	142962084	142962185	142962353	142962389	3.71137e-06	-0.142
GLG1	RI	chr16	-	74481325	74487232	74481325	74486029	74487068	74487232	6.19262e-06	0.238
NDUFS2	RI	chr1	+	161183653	161184184	161183653	161183711	161183945	161184184	2.54221e-05	0.28
CTNNB1	RI	chr3	+	41280624	41281939	41280624	41280845	41281309	41281939	2.7275e-05	0.223
CDCA8	RI	chr1	+	38158072	38158456	38158072	38158250	38158347	38158456	7.71233e-05	-0.272
NAP1L1	RI	chr12	-	76439162	76442244	76439162	76441498	76442172	76442244	8.23814e-05	-0.138
HINT1	RI	chr5	-	130498108	130498338	130498108	130498170	130498264	130498338	0.000154704	0.299
CANT1	RI	chr17	-	76993073	76994045	76993073	76993726	76993921	76994045	0.00023216	0.296
CLK1	RI	chr2	-	201724402	201726189	201724402	201724469	201725960	201726189	0.000259311	0.199
HMGN3	RI	chr6	-	79910961	79912106	79910961	79911443	79911992	79912106	0.000260822	0.249
OTUB1	RI	chr11	+	63764001	63764413	63764001	63764120	63764328	63764413	0.00104346	0.163
UNC50	RI	chr2	+	99232793	99232996	99232793	99232809	99232894	99232996	0.00135563	0.133
PCID2	RI	chr13	-	113831852	113832601	113831852	113832322	113832487	113832601	0.00231958	-0.208
DALRD3	RI	chr3	-	49053251	49053493	49053251	49053305	49053405	49053493	0.00302451	-0.252
USP20	RI	chr9	+	132642391	132644117	132642391	132642568	132642745	132644117	0.00341722	-0.191
MAPKAPK5-AS1	RI	chr12	-	112277572	112278281	112277572	112277807	112278136	112278281	0.00356556	0.217
WTAP	RI	chr6	+	160169222	160170453	160169222	160169401	160169621	160170453	0.00516551	0.102
THYN1	RI	chr11	-	134122733	134123260	134122733	134122810	134123120	134123260	0.00600362	-0.165
CREBZF	RI	chr11	-	85374567	85376182	85374567	85374645	85374858	85376182	0.00624565	0.122
METTL17	RI	chr14	+	21464685	21465194	21464685	21464870	21464943	21465194	0.00677171	-0.199
NFATC4	RI	chr14	+	24845499	24848811	24845499	24846084	24846843	24848811	0.00820616	0.195
CTC1	RI	chr17	-	8132459	8132668	8132459	8132524	8132619	8132668	0.0148223	0.299
HNRNPM	RI	chr19	+	8530207	8530399	8530207	8530246	8530363	8530399	0.0161674	-0.135
DALRD3	RI	chr3	-	49054042	49054277	49054042	49054106	49054206	49054277	0.0164433	-0.153
ADAM15	RI	chr1	+	155028262	155028476	155028262	155028328	155028407	155028476	0.0240586	-0.188
ENOSF1	RI	chr18	-	670323	674406	670323	673076	674160	674406	0.0261322	-0.152
PCID2	RI	chr13	-	113831852	113832601	113831852	113832290	113832487	113832601	0.0261322	0.146
CIRBP	RI	chr19	+	1271979	1273171	1271979	1272050	1272425	1273171	0.0303759	0.111
ARFGAP1	RI	chr20	+	61915466	61916274	61915466	61915864	61916217	61916274	0.0343688	0.15
C18orf21	RI	chr18	+	33552587	33552870	33552587	33552768	33552847	33552870	0.0343688	-0.196
AP1G2	RI	chr14	-	24035024	24035369	24035024	24035101	24035272	24035369	0.0360096	0.146
SAT2	RI	chr17	-	7530070	7530319	7530070	7530111	7530260	7530319	0.0393789	0.16
ACADVL	RI	chr17	+	7127980	7128203	7127980	7128033	7128127	7128203	0.0482365	-0.103

## Sheet: 3
Shared events Jurkat iTax, Jurkat iHBZ
#Shared SE
geneSymbol	exonStart_0base	exonEnd	upstreamES	upstreamEE	downstreamES	downstreamEE
ATF2	175957270	175957344	175945387	175945493	175957788	175957995
BRD9	883465	883565	881221	881297	884052	884185
BTBD10	13466570	13466728	13443188	13443385	13484638	13484844
C12orf73	104347191	104347312	104343980	104345408	104350408	104350526
CHCHD7	57125320	57125448	57124314	57124396	57127156	57127226
CNOT2	70687850	70688074	70671911	70672054	70704674	70704797
DCAF8	160231074	160231140	160213749	160213824	160231906	160232318
DCAF8	160231074	160231148	160213749	160213824	160231906	160232318
DOK2	21769411	21769499	21768183	21768368	21771049	21771205
EIF4A2	186506098	186506209	186505591	186505671	186506913	186507685
EXOC7	74087223	74087316	74085255	74085401	74090494	74090662
EYA3	28324794	28324862	28323830	28323889	28326470	28326560
FGFR1OP2	27113447	27113561	27110533	27110676	27116274	27116388
FOXM1	2974520	2974565	2973848	2973918	2975558	2975687
GOLGA4	37330725	37330782	37323448	37323763	37336469	37336568
GPBP1	56532939	56532999	56531792	56531859	56542126	56542311
HIPK3	33369711	33369774	33369397	33369559	33370067	33370364
HMGCS1	43298110	43298236	43297103	43297268	43298619	43299077
HSD17B4	118807330	118807395	118792009	118792063	118809602	118809710
HSPH1	31717928	31718060	31715258	31715396	31719699	31719905
IVNS1ABP	185275616	185275757	185274646	185274775	185276145	185276271
KCNAB2	6101890	6101932	6100576	6100705	6132814	6132858
KCTD20	36411194	36411307	36410543	36410888	36437828	36438034
KDM4A	44119333	44119470	44118807	44118984	44121261	44121437
KIAA0226L	46952024	46952140	46946075	46946732	46961268	46961635
MELK	36597218	36597287	36589532	36589649	36599390	36599483
MITD1	99789876	99789965	99787972	99788109	99790377	99790479
MRPL42	93864261	93864281	93862967	93863131	93870729	93870793
MRPL42	93864261	93864366	93862967	93863131	93870729	93870793
MTMR1	149903935	149904099	149901013	149901202	149905066	149905252
MYO18B	26349480	26349586	26348251	26348389	26351144	26351330
MYO9B	17321141	17321189	17320394	17320518	17321523	17321657
MZB1	138725015	138725109	138724149	138724274	138725368	138725605
MZB1	138725015	138725125	138724149	138724274	138725368	138725605
NF2	30079008	30079053	30077427	30077590	30090740	30094589
OGT	70764416	70764485	70757678	70757922	70767756	70767873
PDGFC	157782580	157782641	157771372	157771568	157891937	157892546
PDS5A	39928394	39928481	39927455	39927553	39929580	39929784
POLG	89861169	89861268	89860606	89860767	89861771	89861980
PTPRC	198668692	198668833	198661475	198661502	198672426	198672501
PTPRC	198671515	198671659	198661475	198661502	198672426	198672501
RAB1A	65316072	65316204	65313987	65315824	65325104	65325200
RNMT	13730625	13730754	13726658	13726728	13731474	13731933
SAP30BP	73701690	73701771	73700835	73700894	73702087	73702172
SAP30BP	73701690	73701773	73700835	73700894	73702087	73702172
SAT1	23802410	23802520	23801916	23802000	23803444	23803546
SDCCAG8	243456700	243456796	243456392	243456521	243468014	243468079
SDHAP3	1579391	1579599	1576293	1576424	1585098	1585248
SENP5	196654666	196654750	196630403	196630481	196656503	196656554
SEPT2	242256913	242257009	242255275	242255397	242263630	242263656
SEPT2	242256913	242257014	242255275	242255397	242263630	242263656
SPTAN1	131355261	131355321	131353755	131353904	131356453	131356652
STAG3L5P-PVRIG2P-PILRB	99951517	99951635	99950832	99950893	99952765	99952863
STAG3L5P-PVRIG2P-PILRB	99951517	99951635	99950995	99951106	99952765	99952863
STAG3L5P-PVRIG2P-PILRB	99951593	99951635	99950995	99951106	99952765	99952863
TCERG1	145841580	145841659	145838446	145838900	145843113	145843356
TMEM126B	85340175	85340247	85339616	85339732	85342730	85342852
TMEM126B	85340175	85340306	85339616	85339732	85342730	85342852
TMEM219	29983362	29983461	29982728	29982899	29984270	29984373
UBR5	103314498	103314709	103312227	103312379	103316270	103316397
VPS13C	62210916	62210983	62210334	62210456	62211487	62211648
YWHAZ	101964156	101964353	101960823	101961128	101965496	101965623
ZC3H13	46550316	46550400	46549417	46549973	46553947	46554139
ZC3H13	46550346	46550400	46549417	46549973	46553947	46554139
ZFAS1	47897439	47897501	47897021	47897107	47905581	47905795
ABI1	27047990	27048164	27040526	27040712	27054146	27054247
ABI1	27047990	27048167	27040526	27040712	27054146	27054247
ACIN1	23559190	23559310	23550956	23551045	23559730	23559842
ANAPC16	73983645	73983814	73975757	73975896	73990123	73990198
AP1G2	24032408	24032491	24031712	24031802	24032588	24032711
AP1G2	24032408	24032511	24031712	24031802	24032588	24032711
AP1G2	24035024	24035101	24034814	24034910	24035272	24035369
AP1G2	24035770	24035895	24035486	24035628	24036319	24036528
BCLAF1	136588166	136588313	136582402	136582615	136589299	136589477
C11orf49	47008758	47008861	46958239	46958402	47073938	47074069
CCDC14	123674689	123674812	123667742	123667979	123674892	123674962
CD1D	158153720	158153825	158151821	158152100	158153918	158156216
CD1D	158153725	158153825	158151821	158152100	158153918	158156216
CD1E	158325089	158325359	158323485	158323836	158325616	158325791
CD1E	158325317	158325359	158323485	158323836	158325616	158325730
CDC25B	3781389	3781512	3781108	3781145	3781617	3781740
CLK1	201724847	201724938	201724402	201724469	201725960	201726189
CLK2	155238498	155238586	155238083	155238150	155239278	155239504
CLK3	74914460	74914557	74912349	74912566	74914834	74914901
COASY	40716726	40716916	40716463	40716595	40717000	40717065
COX20	245005245	245005360	244998638	244999058	245005496	245005560
CPNE1	34220084	34220156	34219866	34219947	34220232	34220307
CPT1B	51012236	51012350	51011948	51012144	51012763	51012848
CRAMP1L	1716073	1716178	1715057	1715139	1716422	1716601
DALRD3	49054044	49054106	49053861	49053944	49054206	49054280
DDX12P	9590270	9590487	9589998	9590085	9590606	9590855
DGUOK	74166036	74166149	74153952	74154179	74173845	74174033
DHX34	47880171	47880246	47879699	47879817	47880356	47880463
DNM1L	32891197	32891230	32890038	32890095	32892997	32893174
DPP7	140006324	140006481	140006141	140006206	140006563	140006682
DPP7	140006392	140006481	140006141	140006206	140006563	140006682
EMC8	85813984	85814075	85812230	85813473	85814816	85814886
EMC8	85813984	85814079	85812230	85813473	85814816	85814886
EML2	46119718	46119816	46119059	46119147	46120022	46120111
ENO3	4856345	4856404	4856089	4856185	4856566	4856636
FAM193B	176958953	176959132	176958282	176958522	176959443	176959642
FAM193B	176958953	176959201	176958282	176958522	176959443	176959642
FASTK	150773999	150774114	150773707	150773919	150774187	150774323
FLNA	153580920	153581043	153580548	153580815	153581139	153581292
GAS5	173833621	173833640	173833394	173833442	173833812	173833842
GMFG	39825900	39825945	39823716	39823766	39826074	39826171
GPR137	64055536	64055686	64055192	64055418	64055811	64055940
GSTM4	110200211	110200293	110199836	110199901	110200393	110200494
GTSF1	54858850	54858951	54856954	54857081	54865016	54865061
HDAC7	48189688	48189799	48189369	48189550	48189989	48190081
HIRA	19392985	19393054	19385470	19385610	19393308	19393403
HIRIP3	30005226	30006164	30004960	30005129	30006423	30006538
HPS1	100195028	100195171	100193739	100193848	100195391	100195529
IFT122	129185732	129185909	129183477	129183624	129188184	129188260
ILF2	153635494	153635609	153635180	153635271	153635690	153635752
ITGAE	3626581	3626677	3623600	3623696	3626981	3627038
KAT2A	40269924	40270035	40269695	40269832	40270314	40270421
KIF23	69733106	69733418	69732646	69732826	69737128	69737380
LARP1	154173359	154173461	154173154	154173283	154173659	154173822
LARP1	154173359	154173482	154173154	154173283	154173659	154173822
LARP1	154173359	154173560	154173154	154173283	154173659	154173822
LAS1L	64744443	64744494	64743935	64744142	64744844	64744930
LRIF1	111493909	111495437	111492472	111492745	111506242	111506566
LUC7L	258599	258663	258076	258187	270647	270746
MAP4K2	64568371	64568503	64568235	64568298	64568582	64568655
MAZ	29820860	29821085	29819917	29820062	29821397	29822504
MBD1	47799703	47799796	47799193	47799325	47799933	47800233
MBD1	47799703	47799841	47799193	47799325	47799933	47800233
MIF4GD	73263826	73263982	73263618	73263711	73264163	73264273
MKI67	129913191	129914271	129911690	129911866	129914754	129914800
MKI67	129914203	129914271	129911690	129911866	129914754	129914800
MRPS10	42181857	42181927	42179518	42179655	42182017	42182082
MRPS10	42181857	42181930	42179518	42179655	42182017	42182082
MRPS10	42181857	42181956	42179518	42179655	42182017	42182082
MSMO1	166254491	166254777	166248817	166248916	166258940	166259089
NADK	1685489	1685647	1685005	1685088	1685722	1685822
NASP	46072992	46074009	46072153	46072263	46078840	46078920
NGLY1	25761504	25761682	25760434	25761126	25770623	25770809
NSD1	176674924	176675080	176673678	176673797	176675181	176675325
NUBP2	1836757	1836956	1836537	1836656	1837677	1837832
NUP50	45566868	45567058	45564048	45564127	45567480	45567564
PFDN1	139680000	139680167	139661033	139661118	139682625	139682689
PFDN5	53690213	53690335	53689622	53689725	53691633	53691708
PFDN5	53690237	53690335	53689622	53689725	53691633	53691708
PITPNB	28250841	28250927	28247656	28249651	28254374	28254497
POLA2	65047202	65047258	65047008	65047097	65048462	65048618
PPHLN1	42745686	42745851	42729684	42729776	42748962	42749024
PPM1M	52280989	52281244	52280710	52280828	52281697	52281810
PSMA4	78834917	78834987	78834518	78834561	78836531	78836609
PTPRC	198663146	198663269	198661475	198661502	198665840	198666038
QTRT1	10818175	10818291	10817977	10818056	10822836	10822975
RFXANK	19307994	19308060	19307771	19307855	19308329	19308430
RHOT2	718487	718541	718352	718411	718655	718699
RHOT2	718487	718569	718352	718411	718655	718699
RPL17	47018105	47018203	47017901	47017954	47018627	47018834
SCYL1	65305740	65305795	65305437	65305653	65305912	65306182
SNX17	27595489	27595607	27594135	27594210	27596113	27596178
SPNS3	4389522	4389621	4381866	4381932	4389706	4389878
SURF2	136226825	136227005	136224586	136224690	136227140	136227310
TCF19	31126673	31126812	31126302	31126499	31126919	31127484
TRPT1	63991571	63991605	63991270	63991439	63991756	63991813
TRPT1	63991571	63991634	63991270	63991439	63991756	63991813
TRPT1	63991571	63991682	63991270	63991439	63991756	63991813
TRPT1	63991571	63991685	63991270	63991439	63991756	63991813
VARS	31751990	31752085	31750872	31750963	31752170	31752279
WRAP73	3551723	3551858	3551560	3551638	3552507	3552594
WSB1	25634769	25634945	25633807	25633908	25636125	25636298
#Shared A3SS
PIH1D1	49954038	49954196	49954038	49954105	49954741	49955115
TFDP2	141692889	141693036	141692889	141693033	141697361	141697524
TRIP12	230670445	230670599	230670445	230670518	230672423	230672580
AP1G2	24034327	24034551	24034327	24034408	24034814	24034910
ECI2	4133782	4133945	4133782	4133935	4135744	4135831
PCNP	101298633	101298848	101298685	101298848	101293041	101293123
SUGP2	19104446	19104608	19104446	19104549	19105174	19105295
USP16	30418987	30419642	30419548	30419642	30415743	30415920
#Shared A5SS
ANAPC16	73975757	73975896	73975757	73975830	73983645	73983814
ARID2	46230523	46230774	46230523	46230606	46231103	46231200
ATP5J2-PTCD1	99063733	99063824	99063751	99063824	99057708	99057816
DAP3	155658884	155659034	155658884	155658965	155679563	155679615
KLC1	104145744	104145882	104145744	104145855	104166991	104167064
RPL23AP7	114384457	114384715	114384614	114384715	114383185	114383306
SLC38A1	46662308	46663208	46662647	46663208	46636982	46637097
STAG3L5P-PVRIG2P-PILRB	99950995	99951635	99950995	99951106	99952765	99952863
TMEM106C	48359871	48360012	48359871	48359955	48360465	48360515
WBSCR22	73098096	73098231	73098096	73098134	73100965	73101061
WBSCR22	73098096	73098253	73098096	73098134	73100965	73101061
WBSCR22	73098096	73098330	73098096	73098134	73100965	73101061
ZBTB8OS	33100302	33100393	33100368	33100393	33099551	33099673
ALDH18A1	97393247	97393406	97393253	97393406	97392715	97392806
AP1G2	24035024	24035369	24035272	24035369	24034814	24034910
CCDC14	123665649	123666166	123666126	123666166	123663695	123663837
CD79A	42383059	42383359	42383059	42383245	42383604	42383723
ENY2	110346551	110346703	110346551	110346631	110348356	110348433
FAM208A	56667071	56667994	56667926	56667994	56662519	56662642
PCNXL4	60590935	60591969	60590935	60591028	60592354	60592541
POMT1	134385289	134385449	134385289	134385383	134385646	134385802
RHOT2	718357	718569	718357	718411	718655	718699
SAFB2	5616138	5616346	5616142	5616346	5613475	5613538
SPECC1L	24717255	24718886	24717255	24717291	24720187	24720395
VPS13A	79954431	79954827	79954431	79954498	79955093	79955198
#Shared MXE
AP1G2	24035024	24035238	24035272	24035353	24034814	24034910
FAM208A	56667071	56667871	56667926	56667994	56662519	56662642
GMFG	39825900	39825945	39826074	39826194	39823716	39823766
HNRNPD	83280721	83280792	83292680	83292737	83279811	83279973
MYSM1	59134101	59134238	59134303	59134354	59133518	59133593
RAB6A	73429657	73429763	73429829	73429935	73427295	73427407
RCOR3	211477424	211477482	211485696	211485829	211469017	211469095
TFDP2	141724282	141724386	141811902	141811969	141697361	141697524
GMFG	39823716	39823766	39825900	39825950	39818996	39819188
PFDN1	139661033	139661118	139680000	139680167	139624634	139625642
#Shared RI
ACADVL	7127980	7128203	7127980	7128033	7128127	7128203
C18orf21	33552587	33552870	33552587	33552768	33552847	33552870
CDCA8	38158072	38158456	38158072	38158250	38158347	38158456
ENOSF1	670323	674406	670323	673076	674160	674406
HNRNPM	8530207	8530399	8530207	8530246	8530363	8530399
METTL17	21464685	21465194	21464685	21464870	21464943	21465194
NAP1L1	76439162	76442244	76439162	76441498	76442172	76442244
PCID2	113831852	113832601	113831852	113832322	113832487	113832601
THYN1	134122733	134123260	134122733	134122810	134123120	134123260
ULK3	75132574	75132982	75132574	75132657	75132838	75132982
USP20	132642391	132644117	132642391	132642568	132642745	132644117
ZNF714	21299612	21307883	21299612	21301688	21307763	21307883
CANT1	76993073	76994045	76993073	76993726	76993921	76994045
CDK17	96672038	96674663	96672038	96674057	96674585	96674663
CIRBP	1271979	1273171	1271979	1272050	1272425	1273171
GLG1	74481325	74487232	74481325	74486029	74487068	74487232
HMGN3	79910961	79912106	79910961	79911443	79911992	79912106
LUC7L3	48827861	48830072	48827861	48828055	48829560	48830072
MAPKAPK5-AS1	112277572	112278281	112277572	112277807	112278136	112278281
NFATC4	24845499	24848811	24845499	24846084	24846843	24848811
OTUB1	63764001	63764413	63764001	63764120	63764328	63764413
WTAP	160169222	160170453	160169222	160169401	160169621	160170453

## Sheet: 4
GOrilla results AS genes in Jurkat iTax
GO Term	Description	P-value	FDR q-value
GO:1901314	regulation of histone H2A K63-linked ubiquitination	0.0001	0.16
GO:0045934	negative regulation of nucleobase-containing compound metabolic process	0.000126	0.179
GO:1901315	negative regulation of histone H2A K63-linked ubiquitination	0.0001	0.183
GO:0044237	cellular metabolic process	0.000167	0.193
GO:0044260	cellular macromolecule metabolic process	0.00022	0.2
GO:0031324	negative regulation of cellular metabolic process	0.000206	0.202
GO:0043487	regulation of RNA stability	0.000165	0.21
GO:1902369	negative regulation of RNA catabolic process	0.000198	0.211
GO:0033183	negative regulation of histone ubiquitination	0.0001	0.213
GO:0019219	regulation of nucleobase-containing compound metabolic process	0.000305	0.229
GO:1902373	negative regulation of mRNA catabolic process	0.000289	0.23
GO:1902275	regulation of chromatin organization	0.000435	0.231
GO:1903047	mitotic cell cycle process	0.00042	0.233
GO:0008283	cell proliferation	0.000373	0.238
GO:0008152	metabolic process	0.000418	0.242
GO:0043489	RNA stabilization	0.000289	0.246
GO:0034641	cellular nitrogen compound metabolic process	0.000406	0.246
GO:0033044	regulation of chromosome organization	0.000501	0.246
GO:2000779	regulation of double-strand break repair	0.000369	0.248
GO:0071704	organic substance metabolic process	9.79e-05	0.25
GO:0010605	negative regulation of macromolecule metabolic process	0.000493	0.252
GO:0009892	negative regulation of metabolic process	0.000369	0.261
GO:0043170	macromolecule metabolic process	6.2e-05	0.264
GO:0006807	nitrogen compound metabolic process	2.14e-05	0.273
GO:0048255	mRNA stabilization	0.000647	0.295
GO:0051276	chromosome organization	0.000632	0.299
GO:0051172	negative regulation of nitrogen compound metabolic process	9.62e-05	0.307
GO:0006139	nucleobase-containing compound metabolic process	0.000707	0.311
GO:1903312	negative regulation of mRNA metabolic process	0.000778	0.32
GO:0031323	regulation of cellular metabolic process	0.000766	0.326
GO:0009059	macromolecule biosynthetic process	0.000944	0.344
GO:1901360	organic cyclic compound metabolic process	0.000868	0.346
GO:0046483	heterocycle metabolic process	0.000902	0.349
GO:0006725	cellular aromatic compound metabolic process	0.000984	0.349
GO:0034654	nucleobase-containing compound biosynthetic process	0.000934	0.35
GO:0044238	primary metabolic process	6.03e-05	0.384
GO:0003712	transcription coregulator activity	0.000965	1
GO:0005634	nucleus	3.84e-05	0.0672
GO:0044428	nuclear part	0.000147	0.129

## Sheet: 5
GOrilla results AS genes in Jurkat iHBZ
GO:0048024	regulation of mRNA splicing, via spliceosome	1.87e-06	0.00482
GO:0050684	regulation of mRNA processing	8.82e-07	0.00568
GO:0006325	chromatin organization	1.38e-06	0.00594
GO:1903311	regulation of mRNA metabolic process	1.85e-06	0.00596
GO:0000381	regulation of alternative mRNA splicing, via spliceosome	3.9e-06	0.00837
GO:0043484	regulation of RNA splicing	7.87e-07	0.0101
GO:0051252	regulation of RNA metabolic process	8.24e-06	0.0151
GO:0019219	regulation of nucleobase-containing compound metabolic process	1.16e-05	0.0187
GO:1902275	regulation of chromatin organization	1.62e-05	0.0232
GO:0043170	macromolecule metabolic process	3.2e-05	0.0412
GO:0031056	regulation of histone modification	4.77e-05	0.0558
GO:0016569	covalent chromatin modification	8.45e-05	0.0906
GO:0031057	negative regulation of histone modification	9.15e-05	0.0906
GO:1905268	negative regulation of chromatin organization	0.000115	0.0985
GO:0050794	regulation of cellular process	0.000111	0.102
GO:0033043	regulation of organelle organization	0.000185	0.132
GO:0031323	regulation of cellular metabolic process	0.000178	0.135
GO:0080090	regulation of primary metabolic process	0.000178	0.143
GO:0040029	regulation of gene expression, epigenetic	0.000235	0.152
GO:0090304	nucleic acid metabolic process	0.000226	0.153
GO:0007020	microtubule nucleation	0.00028	0.172
GO:0060255	regulation of macromolecule metabolic process	0.000322	0.188
GO:0051171	regulation of nitrogen compound metabolic process	0.000337	0.189
GO:0016570	histone modification	0.000412	0.204
GO:1903047	mitotic cell cycle process	0.000405	0.208
GO:0010468	regulation of gene expression	0.000398	0.213
GO:0016070	RNA metabolic process	0.000507	0.242
GO:0097659	nucleic acid-templated transcription	0.00062	0.266
GO:0050789	regulation of biological process	0.000584	0.269
GO:1901314	regulation of histone H2A K63-linked ubiquitination	0.000714	0.27
GO:0006351	transcription, DNA-templated	0.00062	0.275
GO:1901315	negative regulation of histone H2A K63-linked ubiquitination	0.000714	0.278
GO:0044260	cellular macromolecule metabolic process	0.000761	0.28
GO:0019222	regulation of metabolic process	0.000676	0.281
GO:0033183	negative regulation of histone ubiquitination	0.000714	0.287
GO:0006260	DNA replication	0.000993	0.328
GO:0006807	nitrogen compound metabolic process	0.000923	0.33
GO:0044238	primary metabolic process	0.000964	0.335
GO:0032774	RNA biosynthetic process	0.000991	0.336
GO:0005515	protein binding	0.000396	1
GO:0003676	nucleic acid binding	0.000661	1
GO Term	Description	P-value	FDR q-value
GO:0044428	nuclear part	8.44e-07	0.00148
GO:0016607	nuclear speck	4.28e-06	0.00249
GO:0016604	nuclear body	1.36e-05	0.00592
GO:0005634	nucleus	3.06e-05	0.0089
GO:0005654	nucleoplasm	2.89e-05	0.0101
GO:0044422	organelle part	5.58e-05	0.0139
GO:0044446	intracellular organelle part	6.5e-05	0.0142
GO:0043231	intracellular membrane-bounded organelle	8.99e-05	0.0174
GO:0043229	intracellular organelle	0.000219	0.0348
GO:0044424	intracellular part	0.000211	0.0369
GO:0005815	microtubule organizing center	0.000566	0.0824
GO:0005802	trans-Golgi network	0.000892	0.12

## Sheet: 6
Known cancer genes presenting AS in Jurkat iTax
Symbol
CD79A
EIF4A2
FANCD2
FLNA
HRAS
IKBKB
MDM4
NF2
NUP98
POLG
PTPRC
RAD17
STIL
STAT6
TPR
ZMYM2
RBM10
TRRAP
BCLAF1
MED12
ABI1
IKZF1
CHEK2
NT5C2
SETD2
LEF1
UBR5
NSD1
CHCHD7
KNSTRN
PWWP2A
CANT1
ARID2

## Sheet: 7
Known cancer genes presenting AS in Jurkat iHBZ
Symbol
ARHGAP5
ATM
BRCA1
CARS
CASP8
CD79A
CREB1
CTNNB1
DNMT3A
EIF4A2
ERCC5
FLNA
GNAQ
HRAS
KTN1
MYB
NF2
NUMA1
PCM1
POLG
PPP6C
PTPRC
RAP1GDS1
KDM5A
SRSF2
SRSF3
SMARCA4
TCEA1
TCF12
PRDM2
MLLT10
SPOP
USP8
RECQL4
NCOR1
NCOR2
BCLAF1
ABI1
FGFR1OP
BAZ1A
NT5C2
CAMTA1
DICER1
SUZ12
SETD2
CHST11
LEF1
UBR5
TRIM33
BCOR
RFWD3
N4BP2
BIRC6
NSD1
RBM15
CHCHD7
TBL1XR1
FIP1L1
CANT1
ZNF384
ARID2
FLCN

## Sheet: 8
Genes presenting DEGs and ASEs
iTax	iHBZ
CD1D	ABCG1
CD1E	ALDH1A2
CENPV	ANO6
CHI3L2	BRCA1
CMSS1	CD1D
DUSP22	CLK1
FER1L4	CLK3
FLOT2	DDX54
FMNL3	EIF4A2
HMGCS1	FAM60A
HSPH1	HMGCR
LDLR	HMGCS1
MSMO1	HSPH1
MTHFD1	IMPDH2
PTK2B	ITGA4
SDHAP3	LGALS9
SETD2	LPCAT4
STX16-NPEPL1	MSMO1
SYTL3	NCOA5
TCF7	NMT2
TM6SF1	RBM25
ZFAS1	RFX3
ZMIZ2	RRM1
	RWDD3
	SEC24B
	STAM
	TCERG1
	VARS
	ZUFSP

## Sheet: 9
ASEs detected in HTLV-1 carriers of the Japanese cohort
geneSymbol	Type	chr	strand	exonStart_0base	exonEnd	upstreamES	upstreamEE	downstreamES	downstreamEE	FDR	IncLevelDifference
WNK1	SE	chr12	+	988738	989197	987437	987527	990857	990955	0	-0.16
GHITM	SE	chr10	+	85904630	85904772	85903750	85903862	85908485	85908594	0	0.177
GHITM	SE	chr10	+	85904719	85904772	85903750	85903862	85908485	85908594	0	0.399
RGCC	SE	chr13	+	42033307	42033375	42032420	42032606	42040958	42041066	0	-0.121
RGCC	SE	chr13	+	42033179	42033375	42032420	42032606	42040958	42041066	0	-0.154
RGCC	SE	chr13	+	42033183	42033375	42032420	42032606	42040958	42041066	0	-0.124
RGCC	SE	chr13	+	42033137	42033375	42032420	42032606	42040958	42041066	0	-0.119
SRSF1	SE	chr17	-	56082774	56082961	56082283	56082402	56083161	56083334	0	0.475
SRSF1	SE	chr17	-	56082758	56082961	56082283	56082402	56083161	56083334	0	0.493
LINC01578	SE	chr15	+	93431414	93431544	93429398	93429484	93435233	93435302	0	-0.343
LINC01578	SE	chr15	+	93431484	93431544	93429398	93429484	93435233	93435302	0	-0.276
LAMTOR5	SE	chr1	-	110949654	110949750	110948939	110949001	110950207	110950546	0	-0.171
EZR	SE	chr6	-	159239113	159239198	159210319	159210403	159240348	159240456	0	0.143
SEMA4D	SE	chr9	-	92001281	92001397	91978655	91978865	92002300	92002523	0	0.177
PARP8	SE	chr5	+	50117046	50117172	50111265	50111358	50118168	50118234	0	0.337
FGD3	SE	chr9	+	95782112	95782143	95780417	95780497	95782598	95782706	0	0.252
FGD3	SE	chr9	+	95782112	95782192	95780417	95780497	95782598	95782706	0	0.321
FGD3	SE	chr9	+	95782117	95782143	95780417	95780497	95782598	95782706	0	0.371
CD53	SE	chr1	+	111440430	111440514	111437581	111437677	111441745	111442558	0	0.23
CD53	SE	chr1	+	111440430	111440514	111434966	111435155	111441745	111442558	0	0.348
CD53	SE	chr1	+	111436948	111437023	111434966	111435155	111441745	111442558	0	0.18
CD53	SE	chr1	+	111439274	111439355	111437581	111437677	111441745	111442558	0	0.187
UQCRC1	SE	chr3	-	48643202	48643289	48642083	48642213	48646594	48646735	0	0.149
BEX4	SE	chrX	+	102470609	102470692	102470019	102470166	102471076	102472128	0	0.506
ABI1	SE	chr10	-	27047990	27048167	27040526	27040712	27054146	27054247	0	-0.262
HMGCS1	SE	chr5	-	43298110	43298236	43297103	43297268	43298619	43299077	0	0.592
ZC3HAV1	SE	chr7	-	138774369	138774505	138768525	138768778	138793769	138794465	0	0.145
RAD21	SE	chr8	-	117873392	117873536	117870590	117870697	117874079	117874179	0	-0.122
MBTPS1	SE	chr16	-	84092906	84093033	84089609	84089740	84096909	84097050	0	0.394
SF1	SE	chr11	-	64540901	64540966	64537727	64537880	64543969	64544098	0	0.249
SF1	SE	chr11	-	64540901	64540977	64537727	64537880	64543969	64544098	0	0.3
SF1	SE	chr11	-	64540873	64540977	64537727	64537880	64543969	64544098	0	0.312
CD6	SE	chr11	+	60785763	60785865	60785419	60785485	60786725	60787848	0	0.142
CD6	SE	chr11	+	60785760	60785865	60785230	60785485	60786725	60787848	0	0.145
TAF9	SE	chr5	-	68662329	68662422	68660569	68661581	68665289	68665409	0	0.345
PCED1B	SE	chr12	+	47617706	47617822	47610004	47610472	47628789	47630446	0	-0.255
WHAMM	SE	chr15	+	83479323	83479461	83478379	83479087	83481854	83482028	0	-0.404
WHAMM	SE	chr15	+	83490462	83490591	83488074	83488240	83491851	83492039	0	0.309
PLAC8	SE	chr4	-	84026048	84026173	84015830	84015944	84035818	84035911	0	0.155
PLAC8	SE	chr4	-	84028956	84029103	84015830	84015944	84035818	84035911	0	0.352
PLAC8	SE	chr4	-	84028956	84029103	84026048	84026173	84035818	84035911	0	0.302
WIPF1	SE	chr2	-	175439931	175440099	175436403	175437174	175446037	175446167	0	0.108
WIPF1	SE	chr2	-	175439931	175440134	175436403	175437174	175446037	175446167	0	0.108
SRSF7	SE	chr2	-	38976039	38976243	38975720	38975795	38976670	38976847	0	-0.337
ARHGEF3	SE	chr3	-	56785083	56785160	56779232	56779490	56785327	56785424	0	0.351
LUC7L3	SE	chr17	+	48828657	48828723	48827861	48828055	48829560	48830072	0	-0.502
PIK3IP1	SE	chr22	-	31685300	31685379	31677578	31679274	31685484	31685685	0	0.273
CMIP	SE	chr16	+	81704287	81704402	81703746	81703850	81705570	81705675	0	-0.119
GOLGA8A	SE	chr15	-	34720815	34720905	34699724	34699936	34729598	34729667	0	-0.752
GOLGA8A	SE	chr15	-	34727583	34727672	34699724	34699936	34729598	34729667	0	-0.33
FYB	SE	chr5	-	39126099	39126237	39124354	39124380	39127842	39127909	0	0.419
FYB	SE	chr5	-	39126106	39126237	39124354	39124380	39127842	39127888	0	0.423
TNFSF12-TNFSF13	SE	chr17	+	7462940	7463019	7454259	7454295	7463162	7463210	0	0.469
TIAL1	SE	chr10	-	121340292	121340358	121339982	121340050	121341433	121341521	0	0.538
TIAL1	SE	chr10	-	121336358	121336417	121336122	121336262	121336591	121336715	0	-0.281
KLF3	SE	chr4	+	38689570	38689807	38682207	38682303	38690205	38690692	0	-0.154
KLF3	SE	chr4	+	38689583	38689807	38682207	38682303	38690205	38690692	0	-0.198
KLF3	SE	chr4	+	38689672	38689807	38682207	38682303	38690205	38690692	0	-0.158
IST1	SE	chr16	+	71957993	71958184	71957190	71957283	71958671	71958720	0	-0.195
FAM65B	SE	chr6	-	24852960	24853143	24852802	24852846	24861200	24861264	0	-0.326
TAP1	SE	chr6	-	32815080	32815230	32814844	32814981	32815289	32815452	0	-0.26
TAP1	SE	chr6	-	32815080	32815211	32814844	32814981	32815289	32815452	0	-0.293
HIAT1	SE	chr1	+	100534028	100534142	100533532	100533751	100542720	100542833	0	0.534
SNW1	SE	chr14	-	78189523	78189620	78187053	78187171	78197330	78197472	0	0.27
ALYREF	SE	chr17	-	79846751	79846865	79846395	79846459	79847057	79847205	0	-0.133
VPS29	SE	chr12	-	110936624	110936664	110933816	110934008	110939853	110939945	0	-0.415
VPS29	SE	chr12	-	110936624	110936661	110933816	110934008	110939853	110939945	0	-0.406
FUS	SE	chr16	+	31199645	31199678	31196259	31196500	31200443	31200547	0	0.11
UBE2L3	SE	chr22	+	21968845	21968954	21965145	21965332	21975803	21978323	0	-0.355
IWS1	SE	chr2	-	128253836	128253937	128253573	128253724	128255715	128255813	0	-0.449
PAFAH1B1	SE	chr17	+	2575948	2576051	2573456	2573625	2577353	2577582	0	0.449
RTN4	SE	chr2	-	55201830	55201900	55200698	55200757	55209650	55209789	0	0.465
RTN4	SE	chr2	-	55200956	55201003	55200698	55200757	55209650	55209789	0	0.434
VPS37B	SE	chr12	-	123362348	123362511	123355436	123355608	123380498	123380712	0	-0.147
WDR26	SE	chr1	-	224586216	224586295	224585798	224585928	224586590	224586736	0	0.129
SUB1	SE	chr5	+	32599080	32599175	32591674	32591791	32601110	32604185	0	0.13
STARD7	SE	chr2	-	96852954	96853039	96850602	96852652	96858106	96858206	0	0.202
COLGALT1	SE	chr19	+	17690895	17691049	17690290	17690418	17691507	17691714	0	-0.301
RALA	SE	chr7	+	39737006	39737109	39736283	39736458	39745721	39747723	0	-0.312
PRMT2	SE	chr21	+	48056350	48056447	48055506	48055675	48056807	48056902	0	0.108
TNRC18	SE	chr7	-	5433672	5433863	5430115	5430259	5434070	5434226	0	-0.177
RSRC2	SE	chr12	-	122991380	122991470	122989189	122990253	122992764	122992994	0	0.309
SELT	SE	chr3	+	150336495	150336715	150321065	150321286	150340171	150340282	0	-0.178
PTPRC	SE	chr1	+	198700503	198700591	198698265	198698300	198700745	198700855	0	-0.186
PTPRC	SE	chr1	+	198700498	198700591	198698265	198698300	198700745	198700855	0	-0.182
NCL	SE	chr2	-	232320720	232320847	232320111	232320335	232321341	232321475	0	0.166
RNF149	SE	chr2	-	101902542	101902624	101898320	101898519	101905434	101905517	0	0.426
RNF149	SE	chr2	-	101902542	101902639	101898320	101898519	101905434	101905517	0	0.303
WWP1	SE	chr8	+	87474002	87474075	87473452	87473549	87479022	87480178	0	0.202
DNAJA1	SE	chr9	+	33029882	33029987	33026476	33026614	33030437	33030665	0	0.227
HNRNPAB	SE	chr5	+	177632842	177633011	177631815	177632047	177633732	177633891	0	0.233
YWHAB	SE	chr20	+	43531579	43531762	43530171	43530474	43532633	43532757	0	-0.22
YWHAB	SE	chr20	+	43531676	43531762	43530171	43530474	43532633	43532757	0	-0.243
YWHAB	SE	chr20	+	43531538	43531762	43530171	43530474	43532633	43532757	0	-0.352
RBBP7	SE	chrX	-	16870673	16870751	16870168	16870245	16870871	16870998	0	0.185
USP10	SE	chr16	+	84806146	84806291	84801798	84801964	84812500	84813527	0	0.391
USP10	SE	chr16	+	84808765	84808831	84806146	84806291	84812500	84813527	0	0.251
USP10	SE	chr16	+	84808765	84808831	84801798	84801964	84812500	84813527	0	0.467
ITGA6	SE	chr2	+	173354939	173355117	173352853	173352956	173355751	173355850	0	-0.539
SRSF6	SE	chr20	+	42087792	42088060	42087000	42087149	42088410	42088535	0	-0.453
SRSF6	SE	chr20	+	42087792	42087957	42087000	42087149	42088410	42088535	0	-0.466
RCOR1	SE	chr14	+	103187656	103187714	103187343	103187421	103188523	103188753	0	0.597
RCOR1	SE	chr14	+	103187505	103187714	103187343	103187421	103188523	103188753	0	0.711
PSMB4	SE	chr1	+	151373239	151373321	151372917	151373064	151373714	151373831	0	0.122
DHX9	SE	chr1	+	182824711	182824848	182823164	182823313	182825666	182825713	0	-0.367
SEC62	SE	chr3	+	169703592	169703653	169700948	169701041	169710381	169716161	0	0.243
SEC62	SE	chr3	+	169703592	169703653	169700948	169701041	169706027	169706147	0	0.141
CREBBP	SE	chr16	-	3795440	3795596	3795277	3795355	3799627	3799684	0	-0.304
EWSR1	SE	chr22	+	29695223	29695270	29694722	29694885	29695588	29695841	0	0.179
MX1	SE	chr21	+	42821063	42821222	42817926	42818068	42824547	42824796	0	0.44
DDX47	SE	chr12	+	12974141	12974330	12967074	12967158	12974588	12974660	0	0.33
CD247	SE	chr1	-	167407423	167407609	167404635	167404668	167407806	167407887	0	-0.159
LARP1	SE	chr5	+	154183760	154183867	154183099	154183305	154185440	154185592	0	0.249
HNRNPA1	SE	chr12	+	54676862	54677018	54676356	54676449	54677595	54677751	0	0.611
IL10RA	SE	chr11	+	117857398	117857528	117857105	117857249	117859096	117859217	0	-0.286
MINOS1	SE	chr1	+	19951885	19952126	19949967	19950077	19952880	19956315	0	-0.181
SERP1	SE	chr3	-	150263489	150263565	150259779	150262285	150263838	150264428	0	0.106
DDX21	SE	chr10	+	70731646	70731808	70729956	70730106	70733300	70733420	0	0.337
DDX21	SE	chr10	+	70731573	70731808	70729956	70730106	70733300	70733420	0	0.466
IQGAP2	SE	chr5	+	75972686	75972929	75970301	75970534	75973042	75973175	0	-0.154
RBM38	SE	chr20	+	55968334	55968389	55967709	55967833	55982598	55984386	0	0.437
FAM177A1	SE	chr14	+	35515992	35516160	35515609	35515834	35522483	35522657	0	-0.183
HLA-DQB1	SE	chr6	-	32628635	32628659	32627240	32628026	32629123	32629234	0	0.156
MDH1	SE	chr2	+	63821621	63821720	63815742	63816180	63824532	63824708	0	0.334
MCL1	SE	chr1	-	150550719	150550934	150547026	150549967	150551318	150551439	0	-0.156
MCL1	SE	chr1	-	150550719	150550818	150547026	150549967	150551318	150551439	0	-0.155
ECI2	SE	chr6	-	4117776	4118015	4117541	4117685	4119419	4119509	0	-0.406
CCDC137	SE	chr17	+	79639105	79639185	79638773	79638856	79639524	79640936	0	0.232
LBR	SE	chr1	-	225592327	225592408	225592105	225592228	225594365	225594534	0	0.345
SRSF3	SE	chr6	+	36567888	36568053	36566625	36566760	36568928	36568967	0	-0.591
SRSF3	SE	chr6	+	36567597	36568053	36566625	36566760	36568928	36568967	0	-0.603
CAPRIN1	SE	chr11	+	34118742	34118843	34118025	34118220	34120849	34124157	0	0.245
CAPRIN1	SE	chr11	+	34119244	34119308	34118025	34118220	34120849	34124157	0	0.206
PSMA5	SE	chr1	-	109944934	109945149	109941652	109944712	109952549	109952636	0	-0.229
ADCY7	SE	chr16	+	50347299	50347402	50346800	50346947	50347868	50347973	0	-0.1
RPS27L	SE	chr15	-	63448985	63449172	63448611	63448720	63449598	63449741	0	-0.149
LEF1	SE	chr4	-	109002741	109002825	109000647	109000770	109004511	109004602	0	0.481
WDR74	SE	chr11	-	62601089	62601146	62600376	62600603	62601263	62601409	0	0.359
CAPZA1	SE	chr1	+	113203827	113203874	113202322	113202401	113209695	113209767	0	-0.204
TCF7	SE	chr5	+	133480487	133480560	133479282	133479331	133481891	133483920	0	-0.221
MRPL55	SE	chr1	-	228296137	228296175	228295935	228296019	228296655	228296722	0	-0.641
CRBN	SE	chr3	-	3195643	3195759	3195107	3195172	3196430	3196515	0	0.463
SETX	SE	chr9	-	135158013	135158244	135156853	135156961	135158650	135158800	0	-0.129
RAB18	SE	chr10	+	27820457	27820544	27815756	27815818	27821435	27821508	0	-0.302
SEPT6	SE	chrX	-	118759297	118759342	118749687	118750705	118763280	118763471	0	0.221
SGTB	SE	chr5	-	65001155	65001276	65000105	65000205	65004315	65004385	0	-0.187
TUBA4A	SE	chr2	-	220116280	220116435	220114432	220116045	220116729	220116952	0	0.183
TUBA4A	SE	chr2	-	220116286	220116435	220114432	220116045	220116729	220116952	0	0.104
CLK1	SE	chr2	-	201724847	201724938	201724402	201724469	201725960	201726189	0	-0.574
PCNP	SE	chr3	+	101298432	101298610	101293041	101293123	101298685	101298848	0	-0.103
ABI1	SE	chr10	-	27047990	27048164	27040526	27040712	27054146	27054247	3.67604e-14	-0.265
CCDC28A	SE	chr6	+	139103476	139103578	139100958	139101122	139106363	139106518	3.67604e-14	-0.199
IVNS1ABP	SE	chr1	-	185275616	185275757	185274667	185274775	185276145	185276271	3.67604e-14	-0.38
IL4R	SE	chr16	+	27356892	27357110	27356189	27356341	27357787	27357939	3.67604e-14	-0.219
TIAL1	SE	chr10	-	121340289	121340358	121339982	121340050	121341433	121341521	3.67604e-14	0.473
ANTXR2	SE	chr4	-	80828730	80828818	80822770	80828621	80898774	80898855	3.67604e-14	-0.24
POLR1D	SE	chr13	+	28197011	28197247	28195915	28196146	28222515	28222586	3.67604e-14	-0.227
PRKCD	SE	chr3	+	53215222	53215283	53213592	53213792	53215459	53215622	3.67604e-14	0.226
COPE	SE	chr19	-	19017768	19017915	19016384	19016438	19021779	19021903	3.67604e-14	0.187
TIMM17B	SE	chrX	-	48753059	48753255	48752320	48752384	48754041	48754141	3.67604e-14	-0.313
PWP2	SE	chr21	+	45547455	45547574	45546752	45546846	45547812	45548031	3.67604e-14	-0.182
NDRG1	SE	chr8	-	134267512	134267643	134266781	134266838	134269019	134269106	3.67604e-14	-0.322
ALDOA	SE	chr16	+	30077196	30077248	30075599	30075826	30078554	30078687	3.67604e-14	0.237
DGUOK	SE	chr2	+	74175261	74175505	74173845	74174033	74177711	74177859	3.67604e-14	-0.241
AMICA1	SE	chr11	-	118076596	118076706	118074142	118074380	118081201	118081427	3.67604e-14	0.135
FYB	SE	chr5	-	39126073	39126237	39124354	39124380	39127842	39127909	6.92129e-14	0.417
THAP9-AS1	SE	chr4	-	83819141	83819215	83814604	83816000	83820865	83820890	6.92129e-14	0.497
WARS	SE	chr14	-	100841619	100841687	100835423	100835595	100842596	100842680	6.92129e-14	0.534
EVL	SE	chr14	+	100599330	100599496	100599055	100599116	100607516	100607583	6.92129e-14	0.664
ZFAS1	SE	chr20	+	47898288	47898355	47897439	47897501	47905581	47905795	6.92129e-14	-0.16
SHC1	SE	chr1	-	154946309	154946521	154941853	154941924	154946723	154946959	6.92129e-14	-0.566
SUB1	SE	chr5	+	32599066	32599080	32591674	32591791	32601110	32604185	6.92129e-14	0.337
EWSR1	SE	chr22	+	29695184	29695321	29694722	29694885	29695588	29695841	6.92129e-14	0.116
SGTB	SE	chr5	-	65001155	65001272	65000105	65000205	65004315	65004385	6.92129e-14	-0.144
PTTG1IP	SE	chr21	-	46285309	46285362	46269499	46271542	46293416	46293818	1.01056e-13	0.601
IL17RA	SE	chr22	+	17580039	17580200	17579664	17579777	17581244	17581371	1.01056e-13	-0.379
MX1	SE	chr21	+	42823093	42823170	42817926	42818068	42824547	42824796	1.01056e-13	0.236
CRNKL1	SE	chr20	-	20020613	20020723	20020252	20020492	20021329	20021410	1.32723e-13	-0.233
ARPC3	SE	chr12	-	110874469	110874488	110873914	110874009	110874888	110874957	1.6467e-13	0.286
TAB2	SE	chr6	+	149719104	149719198	149718739	149718900	149720239	149720320	1.95425e-13	0.132
TRAF3IP3	SE	chr1	+	209949263	209949469	209948967	209949081	209950696	209950832	1.95425e-13	-0.151
CSE1L	SE	chr20	+	47711014	47711151	47710676	47710823	47711268	47711500	2.24691e-13	-0.459
ARGLU1	SE	chr13	-	107209906	107210107	107209395	107209479	107211779	107212005	2.24691e-13	-0.16
IFNAR2	SE	chr21	+	34617111	34617162	34615977	34616019	34617255	34617379	2.24691e-13	-0.159
TMEM55B	SE	chr14	-	20927786	20927886	20927546	20927599	20928350	20928457	2.54029e-13	0.303
ARGLU1	SE	chr13	-	107209906	107209999	107209395	107209479	107211779	107212005	2.54029e-13	-0.155
MARS	SE	chr12	+	57909898	57909941	57909702	57909774	57910027	57910120	2.54029e-13	-0.119
G3BP1	SE	chr5	+	151173719	151173810	151170449	151170623	151175039	151175136	2.80751e-13	0.275
SULT1A1	SE	chr16	-	28620379	28620543	28620028	28620180	28621251	28621365	2.80751e-13	-0.158
AKNA	SE	chr9	-	117121873	117122074	117120200	117120447	117122175	117122342	2.80751e-13	-0.123
PSIP1	SE	chr9	-	15470992	15471174	15469935	15469991	15472629	15472748	3.09764e-13	-0.175
WNK1	SE	chr12	+	988738	989197	987437	987527	989886	990020	3.95774e-13	-0.274
CD47	SE	chr3	-	107773099	107773195	107770785	107770817	107776323	107776416	3.95774e-13	-0.183
WARS	SE	chr14	-	100841619	100841743	100835423	100835595	100842596	100842680	3.95774e-13	0.498
FDFT1	SE	chr8	+	11666302	11666400	11660267	11660440	11667175	11667359	4.21869e-13	0.13
HNRNPM	SE	chr19	+	8538547	8538592	8536209	8536311	8539050	8539128	4.21869e-13	0.181
PFKFB3	SE	chr10	+	6259097	6259154	6258668	6258743	6261531	6261656	4.5047e-13	0.123
PARP8	SE	chr5	+	50120741	50120809	50118174	50118234	50122588	50122637	5.35122e-13	0.131
PSIP1	SE	chr9	-	15470973	15471174	15469935	15469991	15472629	15472748	5.59222e-13	-0.182
RSRC2	SE	chr12	-	122999258	122999275	122995655	122995735	122999651	122999774	5.59222e-13	-0.323
GPCPD1	SE	chr20	-	5566839	5566915	5564926	5564968	5573972	5574057	5.59222e-13	0.329
RSRC2	SE	chr12	-	122999258	122999401	122995655	122995735	122999651	122999774	6.11987e-13	-0.211
CLK3	SE	chr15	+	74914460	74914557	74912318	74912566	74917242	74917359	7.50295e-13	-0.322
RSRC2	SE	chr12	-	122998313	122998416	122995655	122995735	122999651	122999774	8.3415e-13	-0.17
PHF12	SE	chr17	-	27266470	27266595	27254008	27254081	27277082	27277264	8.85925e-13	-0.119
HSPA9	SE	chr5	-	137909756	137909815	137909451	137909539	137910926	137911318	9.08641e-13	0.178
ANTXR2	SE	chr4	-	80828717	80828818	80822770	80828621	80898774	80898855	9.62346e-13	-0.189
PER1	SE	chr17	-	8049269	8049455	8048068	8048311	8049689	8049820	9.87496e-13	0.1
IST1	SE	chr16	+	71958062	71958184	71957190	71957283	71958671	71958720	1.832e-12	-0.121
SNHG7	SE	chr9	-	139620762	139620843	139619045	139619562	139621497	139621538	1.88089e-12	0.144
CAPZA2	SE	chr7	+	116546316	116546396	116544230	116544437	116550286	116550365	1.92947e-12	0.182
YWHAE	SE	chr17	-	1273002	1273035	1268152	1268352	1303340	1303556	2.00484e-12	0.1
LBR	SE	chr1	-	225592327	225592384	225592105	225592228	225594365	225594534	2.13378e-12	0.57
PSMB4	SE	chr1	+	151373189	151373321	151372917	151373064	151373714	151373831	2.15422e-12	0.203
RBBP7	SE	chrX	-	16870538	16870751	16870168	16870245	16870871	16870998	2.27503e-12	0.295
MATR3	SE	chr5	+	138651385	138651427	138650363	138650425	138651764	138651877	2.37492e-12	0.108
WWP1	SE	chr8	+	87474006	87474075	87473452	87473549	87479022	87480178	2.4668e-12	0.326
FYB	SE	chr5	-	39126099	39126224	39124354	39124380	39127842	39127935	2.55758e-12	0.341
PER1	SE	chr17	-	8049275	8049455	8048068	8048311	8049689	8049820	3.25708e-12	0.222
GLG1	SE	chr16	-	74502843	74502961	74497253	74497377	74503882	74503971	3.96874e-12	0.2
NOP58	SE	chr2	+	203160396	203160560	203157499	203157626	203162101	203162236	4.53087e-12	0.332
SLA	SE	chr8	-	134063272	134063406	134063060	134063160	134072344	134072603	4.56844e-12	-0.113
TMEM55B	SE	chr14	-	20927786	20927892	20927546	20927599	20928350	20928457	5.0194e-12	0.216
SMARCA5	SE	chr4	+	144461515	144461648	144459938	144460091	144464661	144464810	5.06599e-12	0.38
DHX9	SE	chr1	+	182824711	182824863	182823164	182823313	182825666	182825713	5.23614e-12	-0.333
PRKCQ	SE	chr10	-	6527996	6528106	6527113	6527231	6533644	6533774	5.6422e-12	0.214
SEC62	SE	chr3	+	169706027	169706147	169700948	169701041	169710381	169716161	5.66007e-12	0.215
TAF9	SE	chr5	-	68662329	68662422	68660569	68661581	68665483	68665840	5.71802e-12	0.172
FURIN	SE	chr15	+	91420756	91420845	91420364	91420441	91421361	91421534	6.20634e-12	0.102
RSU1	SE	chr10	-	16858971	16859083	16824032	16824083	16859313	16859453	6.6505e-12	0.153
WDR82	SE	chr3	-	52295395	52295495	52294400	52294517	52300967	52301034	7.01962e-12	0.113
BNIP2	SE	chr15	-	59960301	59960337	59955061	59956319	59961090	59961189	7.14533e-12	0.145
UXS1	SE	chr2	-	106715171	106715229	106713173	106713277	106717513	106717574	7.6414e-12	0.277
PRKCQ	SE	chr10	-	6472771	6472900	6469104	6470324	6483854	6484043	7.88544e-12	0.268
VPS29	SE	chr12	-	110937339	110937351	110933816	110934008	110939853	110939945	9.51723e-12	-0.225
TOP1	SE	chr20	+	39720912	39721019	39713101	39713208	39721111	39721227	1.2222e-11	-0.285
FAM3C	SE	chr7	-	121002950	121003001	121000096	121000181	121004183	121004242	1.2222e-11	0.407
CLK3	SE	chr15	+	74914834	74914901	74912349	74912566	74917242	74917359	1.23752e-11	-0.139
LYPLA1	SE	chr8	-	54967619	54967693	54965214	54965316	54974813	54974884	1.27352e-11	0.262
EXOSC10	SE	chr1	-	11137421	11137500	11136898	11137005	11137657	11137708	1.31741e-11	0.275
ELF1	SE	chr13	-	41523941	41524037	41517977	41518061	41525464	41525572	1.55895e-11	0.145
SDHAF2	SE	chr11	+	61205096	61205320	61197596	61197654	61213412	61214239	2.03443e-11	-0.246
SYNE2	SE	chr14	+	64688333	64688422	64687154	64687355	64689906	64690098	2.20008e-11	0.161
PIK3R1	SE	chr5	+	67569766	67569841	67569217	67569310	67575429	67575561	2.47339e-11	0.156
SYNE2	SE	chr14	+	64688293	64688422	64687154	64687355	64689906	64690098	2.48327e-11	0.108
SYNE2	SE	chr14	+	64688251	64688422	64687154	64687355	64689906	64690098	2.54648e-11	0.15
CLEC2D	SE	chr12	+	9833518	9833629	9822303	9822391	9840497	9840682	2.58006e-11	-0.222
ELF1	SE	chr13	-	41523937	41524109	41517967	41518061	41525464	41525572	2.75719e-11	0.114
MAEA	SE	chr4	+	1323584	1323791	1321414	1321491	1326544	1326653	2.87815e-11	-0.323
SYNE2	SE	chr14	+	64688305	64688422	64687154	64687355	64689906	64690098	3.09308e-11	0.157
ZC3H7A	SE	chr16	-	11856405	11856603	11855765	11855899	11857333	11857515	3.2273e-11	0.187
TIMM50	SE	chr19	+	39973524	39973556	39972522	39972673	39973774	39973796	3.2549e-11	0.138
RAN	SE	chr12	+	131357128	131357291	131356538	131356671	131357380	131357457	3.2549e-11	0.139
NANS	SE	chr9	+	100837851	100838014	100823063	100823279	100839199	100839299	3.54585e-11	-0.133
VPS29	SE	chr12	-	110937261	110937351	110933816	110934008	110939853	110939945	3.71572e-11	-0.197
PYROXD1	SE	chr12	+	21609798	21610020	21608928	21609029	21613958	21614088	4.87579e-11	-0.58
WBP1	SE	chr2	+	74686564	74686679	74685526	74685798	74686769	74686872	5.06638e-11	-0.114
PTTG1IP	SE	chr21	-	46285309	46285362	46281077	46281186	46293416	46293818	5.78082e-11	0.267
ZC3H7A	SE	chr16	-	11856526	11856603	11855765	11855899	11857333	11857448	6.01329e-11	0.106
PIK3CD	SE	chr1	+	9770162	9770338	9751524	9751629	9770481	9770654	6.20569e-11	-0.109
PTPRC	SE	chr1	+	198698762	198698894	198698265	198698300	198700745	198700855	6.52897e-11	-0.19
MGEA5	SE	chr10	-	103555130	103555237	103553669	103553755	103557736	103557911	6.65386e-11	-0.241
TAF11	SE	chr6	-	34848065	34848153	34845554	34846497	34850708	34850857	6.90979e-11	0.511
PRMT7	SE	chr16	+	68390043	68390118	68389625	68389786	68390603	68390700	6.91895e-11	-0.17
CCNDBP1	SE	chr15	+	43482252	43482349	43481396	43481478	43482522	43482596	6.91895e-11	0.418
EXOSC10	SE	chr1	-	11137386	11137500	11136898	11137005	11137657	11137708	7.98158e-11	0.406
POLR3E	SE	chr16	+	22339830	22339908	22337081	22337599	22344964	22346424	7.98158e-11	0.555
ELF1	SE	chr13	-	41523941	41524093	41517967	41518061	41525464	41525572	8.17317e-11	0.151
ELF1	SE	chr13	-	41523941	41524128	41517967	41518061	41525464	41525572	8.57009e-11	0.151
SMARCB1	SE	chr22	+	24133942	24134054	24129149	24129449	24135745	24135875	9.00861e-11	0.183
SRSF7	SE	chr2	-	38976381	38976488	38975720	38975795	38976670	38976847	9.32755e-11	-0.361
ARRB2	SE	chr17	+	4618307	4618338	4613788	4614039	4619267	4619324	9.97171e-11	-0.172
UBA5	SE	chr3	+	132379742	132379892	132379139	132379542	132384666	132384712	1.00519e-10	-0.128
ARAP1	SE	chr11	-	72403797	72403830	72399499	72399582	72404369	72404566	1.00995e-10	0.399
MAP3K1	SE	chr5	+	56183204	56183347	56181758	56181890	56184052	56184184	1.08862e-10	0.311
G3BP1	SE	chr5	+	151173763	151173810	151170449	151170623	151175039	151175136	1.1211e-10	0.538
NACA	SE	chr12	-	57109654	57109990	57108385	57108471	57113320	57113380	1.20378e-10	-0.556
WBSCR22	SE	chr7	+	73108321	73108380	73107953	73107999	73111934	73112024	1.25264e-10	0.102
MGEA5	SE	chr10	-	103555121	103555237	103553669	103553755	103557736	103557911	1.26155e-10	-0.229
CAPRIN1	SE	chr11	+	34118742	34118843	34118025	34118220	34119244	34120607	1.38465e-10	0.195
NCOA4	SE	chr10	+	51580879	51580968	51580555	51580696	51581269	51581378	1.87863e-10	0.129
MED4	SE	chr13	-	48654183	48654368	48653979	48654111	48655780	48655867	1.88425e-10	-0.125
SNHG7	SE	chr9	-	139620755	139620868	139619506	139619562	139621497	139621538	1.89023e-10	0.146
ITGA6	SE	chr2	+	173354939	173355117	173354212	173354386	173355751	173355850	1.89553e-10	-0.401
ARRB2	SE	chr17	+	4618281	4618338	4613788	4614039	4619267	4619324	2.05968e-10	-0.187
TIMM17B	SE	chrX	-	48753059	48753255	48752634	48752784	48754041	48754141	2.06542e-10	-0.401
ELF1	SE	chr13	-	41523937	41524037	41517967	41518061	41525464	41525572	2.16561e-10	0.72
AGO2	SE	chr8	-	141545566	141545668	141542514	141542714	141549418	141549553	2.62628e-10	0.185
DGUOK	SE	chr2	+	74175306	74175505	74173845	74174033	74177711	74177859	2.77829e-10	-0.172
HNRNPK	SE	chr9	-	86590376	86590409	86589431	86589504	86591909	86591966	2.90583e-10	-0.318
GSK3B	SE	chr3	-	119719398	119719570	119666114	119666198	119720892	119721086	2.90606e-10	-0.134
ERBB2IP	SE	chr5	+	65367996	65368119	65349233	65350779	65372143	65372236	3.10074e-10	-0.262
CENPC	SE	chr4	-	68340605	68340696	68337988	68338393	68355684	68355839	3.14541e-10	0.502
LBR	SE	chr1	-	225597992	225598118	225594365	225594534	225599038	225599142	3.16919e-10	0.244
KIAA0513	SE	chr16	+	85114920	85114998	85112530	85112609	85120249	85120330	3.34191e-10	0.422
CHD6	SE	chr20	-	40043461	40043621	40041963	40042155	40043825	40044278	3.34191e-10	-0.27
RAB18	SE	chr10	+	27821435	27821508	27798803	27798859	27822663	27822782	3.62879e-10	0.265
BAG1	SE	chr9	-	33262102	33262244	33261084	33261167	33262699	33262828	3.78875e-10	-0.192
ARID5A	SE	chr2	+	97215057	97215196	97213138	97213254	97215489	97215542	4.07525e-10	-0.186
AMICA1	SE	chr11	-	118076629	118076706	118074142	118074380	118081201	118081370	4.08987e-10	0.185
RCSD1	SE	chr1	+	167666335	167667079	167663335	167663539	167673900	167675486	4.29765e-10	0.102
MDH1	SE	chr2	+	63822556	63822653	63821621	63821720	63824532	63824708	4.54073e-10	0.14
IL6ST	SE	chr5	-	55242024	55242111	55238497	55238579	55243320	55243417	4.55753e-10	-0.126
THAP9-AS1	SE	chr4	-	83816844	83816927	83814604	83816000	83820865	83820890	4.84859e-10	0.664
PRKCQ	SE	chr10	-	6472771	6472924	6469104	6470324	6483854	6484043	4.90799e-10	0.355
PPIG	SE	chr2	+	170488108	170488157	170487283	170487497	170488275	170488443	4.90799e-10	-0.144
SLC38A10	SE	chr17	-	79225292	79225412	79220684	79220861	79225994	79226483	4.98037e-10	0.152
UBAP2L	SE	chr1	+	154214175	154214273	154213988	154214041	154215692	154215778	5.03867e-10	-0.21
TWF1	SE	chr12	-	44199633	44199805	44198175	44198375	44200023	44200178	5.28322e-10	-0.222
CAMLG	SE	chr5	+	134079676	134079742	134077155	134077213	134086448	134087850	6.13944e-10	0.189
HIAT1	SE	chr1	+	100535169	100535241	100533532	100533751	100542720	100542833	6.66134e-10	0.308
PRMT7	SE	chr16	+	68389932	68390118	68389625	68389786	68390603	68390700	7.29576e-10	-0.192
DPYD	SE	chr1	-	97547885	97548026	97543299	97544702	97564044	97564188	9.25835e-10	0.333
BEX4	SE	chrX	+	102470582	102470692	102470019	102470166	102471076	102472128	9.33702e-10	0.532
SNAP23	SE	chr15	+	42805371	42805407	42805152	42805194	42805596	42805645	9.33702e-10	-0.211
LCP1	SE	chr13	-	46732960	46733042	46732656	46732786	46733733	46733821	9.65261e-10	0.104
NFKBID	SE	chr19	-	36387814	36388005	36387644	36387733	36388552	36388758	1.01175e-09	0.501
TMEM63A	SE	chr1	-	226054273	226054382	226053596	226053750	226054811	226054863	1.09812e-09	0.298
ZNF274	SE	chr19	+	58721574	58721796	58721326	58721439	58722925	58723052	1.10312e-09	-0.413
RCOR3	SE	chr1	+	211485696	211485829	211477424	211477482	211486765	211489725	1.13073e-09	-0.413
CHD6	SE	chr20	-	40043513	40043621	40041963	40042155	40043825	40044278	1.13784e-09	-0.273
MEF2D	SE	chr1	-	156444899	156445029	156438571	156438812	156446803	156446994	1.16901e-09	0.182
SCAP	SE	chr3	-	47456587	47456670	47456316	47456483	47458611	47458697	1.185e-09	0.151
FURIN	SE	chr15	+	91420691	91420845	91420364	91420441	91421361	91421534	1.18955e-09	0.171
PSMA6	SE	chr14	+	35782086	35782265	35779945	35780101	35783566	35783661	1.26001e-09	0.118
SAMHD1	SE	chr20	-	35563743	35563806	35563431	35563592	35569441	35569514	1.32645e-09	-0.209
FOXJ3	SE	chr1	-	42654973	42655075	42654407	42654599	42656973	42657390	1.34126e-09	0.192
ATP6V1G2-DDX39B	SE	chr6	-	31502408	31502631	31500556	31500688	31503143	31503262	1.34378e-09	-0.148
PCSK7	SE	chr11	-	117079612	117079769	117078685	117078780	117089181	117089284	1.42261e-09	0.132
CERS5	SE	chr12	-	50529215	50529399	50528328	50528485	50529514	50529621	1.44483e-09	-0.114
EMC7	SE	chr15	-	34388095	34388215	34382517	34382656	34393804	34394053	1.44766e-09	0.138
CCT4	SE	chr2	-	62115158	62115392	62112154	62112207	62115515	62115806	1.45019e-09	-0.202
APOL3	SE	chr22	-	36545818	36546012	36545093	36545419	36556716	36556977	1.60646e-09	-0.196
PITRM1	SE	chr10	-	3190178	3190255	3189763	3189929	3191812	3191945	1.60705e-09	0.497
IRF1	SE	chr5	-	131821942	131822065	131820086	131820189	131822248	131822378	1.66729e-09	0.131
TRMT61B	SE	chr2	-	29087882	29087985	29083983	29084174	29092444	29093175	1.72947e-09	0.722
MICU2	SE	chr13	-	22069873	22069981	22069299	22069457	22070190	22070299	1.72947e-09	-0.17
SMCHD1	SE	chr18	+	2673015	2673193	2666868	2667030	2673279	2673362	1.76563e-09	-0.211
TIMM50	SE	chr19	+	39973524	39973603	39972522	39972673	39973774	39973796	1.86147e-09	0.24
ERBB2IP	SE	chr5	+	65367999	65368119	65349233	65350779	65370851	65371058	1.90851e-09	-0.257
TAF9	SE	chr5	-	68662351	68662422	68660569	68661581	68665289	68665409	2.00138e-09	0.548
MX2	SE	chr21	+	42773896	42774055	42770823	42770946	42775193	42775270	2.02787e-09	0.231
SREBF1	SE	chr17	-	17720861	17720905	17720569	17720771	17721009	17721230	2.06045e-09	-0.152
IST1	SE	chr16	+	71957194	71957283	71956376	71956583	71958671	71958724	2.06045e-09	0.329
SNW1	SE	chr14	-	78189523	78189618	78187053	78187171	78197330	78197472	2.06045e-09	0.369
BCLAF1	SE	chr6	-	136590266	136590441	136589299	136589477	136590574	136590750	2.06045e-09	-0.147
RNF213	SE	chr17	+	78356059	78356254	78355346	78355527	78356778	78356870	2.08718e-09	-0.114
UBE2B	SE	chr5	+	133724015	133724104	133710073	133710154	133725915	133727799	2.13113e-09	0.109
ZC3H7A	SE	chr16	-	11856526	11856620	11855765	11855899	11857333	11857515	2.19668e-09	0.197
UPF2	SE	chr10	-	11993067	11993220	11990367	11990507	11994064	11994248	2.28497e-09	-0.164
ACP1	SE	chr2	+	275139	275201	272036	272150	276979	277085	2.40578e-09	0.12
DNAJA1	SE	chr9	+	33026810	33026988	33026476	33026614	33030437	33030665	2.41024e-09	0.394
DDB1	SE	chr11	-	61090482	61090566	61089767	61089884	61091450	61091609	2.62216e-09	0.179
SH3TC1	SE	chr4	+	8238004	8238155	8237159	8237282	8239200	8239397	2.68307e-09	0.357
NFKBID	SE	chr19	-	36387814	36387960	36387627	36387733	36388552	36388740	2.74745e-09	0.253
NRD1	SE	chr1	-	52256204	52256321	52255239	52255329	52256571	52256662	2.76818e-09	0.15
LRPPRC	SE	chr2	-	44123772	44123847	44121683	44121768	44126357	44126473	2.77561e-09	0.228
DHRS1	SE	chr14	-	24760761	24760831	24760344	24760425	24761389	24761536	2.90347e-09	0.211
GRSF1	SE	chr4	-	71697255	71697391	71693568	71693753	71698023	71698167	2.9678e-09	0.167
CALU	SE	chr7	+	128387606	128388421	128379345	128379486	128388626	128388858	3.23917e-09	-0.441
U2SURP	SE	chr3	+	142742816	142742860	142741694	142741906	142745990	142746095	3.35017e-09	0.244
SMARCB1	SE	chr22	+	24133942	24134081	24129149	24129449	24135745	24135875	3.38072e-09	0.24
TSSC4	SE	chr11	+	2423205	2423377	2421717	2422028	2423523	2423680	3.41978e-09	-0.1
CNOT2	SE	chr12	+	70726546	70726626	70723202	70723350	70729217	70729343	3.62434e-09	0.347
PRMT2	SE	chr21	+	48056355	48056459	48055506	48055675	48056807	48056902	3.63794e-09	0.117
TAPBPL	SE	chr12	+	6570329	6570556	6570020	6570104	6571199	6571488	3.69652e-09	-0.15
FKBP11	SE	chr12	-	49318828	49318894	49318343	49318431	49319082	49319330	3.71402e-09	0.12
BCLAF1	SE	chr6	-	136590317	136590441	136589299	136589477	136590574	136590750	3.79736e-09	-0.146
FAM120A	SE	chr9	+	96325286	96325326	96324489	96324586	96326510	96328397	3.81116e-09	-0.201
SEC14L1	SE	chr17	+	75192283	75192393	75190758	75190993	75196565	75196673	3.84344e-09	0.311
EIF5	SE	chr14	+	103802372	103802454	103802128	103802269	103803013	103803186	4.37377e-09	0.186
ITGB1	SE	chr10	-	33199150	33199383	33197295	33197462	33200375	33200598	4.39362e-09	0.141
CCAR2	SE	chr8	+	22475861	22476008	22475211	22475291	22476129	22476241	4.42626e-09	-0.106
HSPA9	SE	chr5	-	137909756	137909858	137909451	137909539	137910926	137911318	4.58925e-09	0.256
NUP50	SE	chr22	+	45566868	45567056	45564048	45564127	45567480	45567564	4.7415e-09	-0.29
RSRC2	SE	chr12	-	122998313	122998421	122995655	122995735	122999651	122999774	4.88337e-09	-0.159
RASGRP1	SE	chr15	-	38793575	38793636	38793343	38793488	38794512	38794622	5.11189e-09	-0.144
RASAL3	SE	chr19	-	15571031	15571069	15569339	15569466	15571870	15571932	5.43387e-09	0.14
ELMO1	SE	chr7	-	36927164	36927277	36917614	36917722	36934458	36934622	5.5257e-09	0.315
POLR2B	SE	chr4	+	57872981	57873168	57871765	57871885	57876526	57876670	6.00663e-09	0.166
SNX2	SE	chr5	+	122143839	122144050	122139166	122139308	122151590	122151666	6.03392e-09	0.15
HNRNPM	SE	chr19	+	8538522	8538592	8536209	8536311	8539050	8539128	6.33961e-09	0.251
CD247	SE	chr1	-	167407423	167407609	167404635	167404671	167407806	167407887	6.48178e-09	-0.143
AGPAT3	SE	chr21	+	45397926	45398002	45391268	45391371	45400869	45401068	6.53055e-09	0.241
INIP	SE	chr9	-	115479652	115479758	115478740	115478821	115480266	115480387	6.65748e-09	-0.297
SNX3	SE	chr6	-	108535701	108535826	108532420	108533458	108544153	108544249	6.77167e-09	0.123
TPR	SE	chr1	-	186294898	186294986	186292817	186293002	186295235	186295367	6.90634e-09	0.125
ZNF101	SE	chr19	+	19789534	19789595	19788672	19788799	19789989	19794315	7.44462e-09	0.16
RBM4	SE	chr11	+	66410920	66411611	66407170	66407594	66433326	66435858	7.66575e-09	-0.248
ADGRE5	SE	chr19	+	14507153	14507285	14501735	14501891	14508469	14508616	7.6875e-09	0.138
CYB5R4	SE	chr6	+	84635854	84636050	84634188	84634311	84644313	84644454	7.80933e-09	-0.149
RAB8B	SE	chr15	+	63542566	63542676	63541843	63541904	63547705	63547783	7.89142e-09	-0.138
FMNL1	SE	chr17	+	43322998	43323100	43322619	43322783	43323244	43323340	8.48578e-09	0.117
THUMPD1	SE	chr16	-	20749409	20749591	20749029	20749278	20750218	20750393	8.57061e-09	-0.196
COPA	SE	chr1	-	160264273	160264383	160263175	160263253	160264557	160264647	8.72586e-09	0.178
HSPA9	SE	chr5	-	137902314	137902407	137897268	137897478	137902689	137902794	8.74526e-09	0.193
IL17RA	SE	chr22	+	17580039	17580196	17579664	17579777	17581244	17581371	8.75428e-09	-0.163
RAB4A	SE	chr1	+	229424475	229424590	229406808	229407117	229431594	229431657	8.81412e-09	-0.35
CTC1	SE	chr17	-	8133208	8133286	8132652	8132764	8133611	8133786	8.81412e-09	0.17
UBASH3A	SE	chr21	+	43854941	43855064	43852211	43852311	43857597	43857690	9.04584e-09	0.248
CERS5	SE	chr12	-	50529215	50529364	50528328	50528485	50529514	50529621	9.05912e-09	-0.105
RNH1	SE	chr11	-	504823	505001	502061	502249	507112	507283	9.11162e-09	0.223
FN3KRP	SE	chr17	+	80678636	80678717	80678125	80678239	80680679	80680762	9.66903e-09	-0.506
KDM5A	SE	chr12	-	395291	395373	389222	394828	401924	402335	9.95839e-09	0.117
NBR1	SE	chr17	+	41354671	41354729	41353702	41353797	41361919	41363708	1.02053e-08	0.367
PRMT2	SE	chr21	+	48056350	48056459	48055506	48055675	48056807	48056902	1.06851e-08	0.159
ERBB2IP	SE	chr5	+	65367996	65368119	65349233	65350779	65370851	65371058	1.17328e-08	-0.314
SAR1A	SE	chr10	-	71922445	71922571	71921613	71921687	71930168	71930285	1.18242e-08	-0.306
PSMG4	SE	chr6	+	3263917	3263993	3259161	3259430	3267824	3268300	1.20571e-08	0.351
RNF19A	SE	chr8	-	101273769	101273983	101272081	101272225	101276261	101276423	1.21708e-08	-0.148
CCT4	SE	chr2	-	62115333	62115392	62112154	62112207	62115515	62115806	1.27799e-08	-0.174
CDC23	SE	chr5	-	137548679	137548752	137542235	137542373	137548840	137549032	1.35979e-08	0.308
SUPT16H	SE	chr14	-	21840627	21840876	21840032	21840203	21841496	21841589	1.45493e-08	-0.125
IST1	SE	chr16	+	71957159	71957283	71956376	71956583	71958671	71958720	1.64111e-08	0.309
SZRD1	SE	chr1	+	16717869	16717919	16693524	16693803	16719725	16719977	1.68127e-08	0.212
MRPL49	SE	chr11	+	64891973	64892124	64889715	64889936	64892959	64893084	1.70001e-08	0.504
TRERF1	SE	chr6	-	42230997	42231306	42227076	42227461	42232441	42232592	1.70001e-08	-0.214
TRAPPC4	SE	chr11	+	118890859	118890963	118889852	118890027	118894030	118894385	1.86969e-08	0.401
NUP50	SE	chr22	+	45566868	45567058	45564048	45564127	45567480	45567564	1.88717e-08	-0.392
HMGB1	SE	chr13	-	31035775	31035825	31032878	31035670	31036674	31036849	2.03859e-08	-0.318
AGO2	SE	chr8	-	141545566	141545763	141542514	141542714	141549418	141549553	2.10726e-08	0.297
SAR1A	SE	chr10	-	71922445	71922573	71921613	71921687	71930168	71930285	2.11336e-08	-0.302
NCOA4	SE	chr10	+	51579133	51579282	51565107	51565296	51580555	51580696	2.11336e-08	0.151
RAB35	SE	chr12	-	120546395	120546507	120546220	120546271	120554402	120554643	2.15631e-08	-0.114
U2AF1	SE	chr21	-	44515547	44515646	44514764	44514898	44515803	44515853	2.15631e-08	0.193
TRERF1	SE	chr6	-	42231057	42231306	42227076	42227461	42232441	42232592	2.20266e-08	-0.233
ANKRD11	SE	chr16	-	89358088	89358207	89357420	89357591	89371613	89371752	2.25916e-08	0.108
PTGER2	SE	chr14	+	52792489	52792619	52781015	52782109	52793938	52795322	2.29235e-08	-0.102
ZCCHC6	SE	chr9	-	88940144	88940169	88937787	88938875	88940248	88940429	2.31017e-08	-0.21
NIN	SE	chr14	-	51223209	51225348	51221459	51221585	51226574	51227077	2.3231e-08	0.227
ST6GAL1	SE	chr3	+	186714335	186714461	186681572	186681714	186756529	186756661	2.33194e-08	0.178
PTPRC	SE	chr1	+	198665840	198666038	198661475	198661502	198668692	198668833	2.33775e-08	-0.195
EIF4E3	SE	chr3	-	71743025	71743092	71739160	71739316	71774342	71774526	2.39667e-08	0.105
ILF2	SE	chr1	-	153642311	153642384	153640928	153641033	153642646	153642706	2.39667e-08	0.116
WBSCR22	SE	chr7	+	73111618	73111846	73108321	73108380	73111934	73112024	2.49383e-08	-0.177
CLK2	SE	chr1	-	155238498	155238586	155238083	155238150	155239278	155239504	2.60623e-08	-0.271
USP15	SE	chr12	+	62790074	62790178	62786832	62786982	62794966	62795055	2.7178e-08	0.137
EIF6	SE	chr20	-	33872183	33872295	33867744	33867921	33872528	33872619	2.82396e-08	0.167
ARAP1	SE	chr11	-	72403797	72403978	72399499	72399582	72404369	72404528	3.04357e-08	0.299
TNIP2	SE	chr4	-	2746423	2746672	2746113	2746233	2747172	2747262	3.07595e-08	-0.165
EPC1	SE	chr10	-	32581423	32581572	32580090	32580250	32581915	32582122	3.17764e-08	0.133
PSMD1	SE	chr2	+	232035681	232035809	232035279	232035435	232037248	232037540	3.20685e-08	-0.116
MED15	SE	chr22	+	20936948	20937034	20922807	20922918	20937126	20937254	3.20685e-08	0.113
CHD3	SE	chr17	+	7797732	7797806	7797432	7797583	7798234	7798442	3.20685e-08	-0.122
STAG3L5P-PVRIG2P-PILRB	SE	chr7	+	99948874	99949033	99947339	99947510	99949785	99950101	3.25853e-08	0.133
BANF1	SE	chr11	+	65770705	65770844	65769549	65770041	65771096	65771617	3.27487e-08	0.105
SAP30BP	SE	chr17	+	73699614	73699785	73699390	73699451	73699887	73699939	3.52968e-08	-0.196
WBP1	SE	chr2	+	74686564	74686689	74685526	74685798	74686769	74686872	3.77303e-08	-0.144
SAMSN1	SE	chr21	-	15889212	15889362	15884764	15884894	15893470	15893542	3.77303e-08	0.235
PRKX	SE	chrX	-	3588219	3588446	3573189	3573453	3592638	3592807	3.94451e-08	-0.146
SCARB2	SE	chr4	-	77095296	77095466	77091019	77091138	77096943	77097063	4.2201e-08	0.337
MED15	SE	chr22	+	20936945	20937034	20922807	20922918	20937126	20937254	4.35501e-08	0.112
VCL	SE	chr10	+	75842211	75842302	75834500	75834661	75843123	75843271	4.37438e-08	0.147
MRPL49	SE	chr11	+	64891973	64892124	64889715	64889896	64892959	64893084	4.44923e-08	0.317
SETD3	SE	chr14	-	99870561	99870647	99866435	99866596	99871541	99871708	4.54505e-08	0.444
NUMB	SE	chr14	-	73750788	73751082	73749066	73749213	73753817	73754022	4.55e-08	-0.302
STK38L	SE	chr12	+	27470268	27470386	27468221	27468283	27470828	27470952	4.69189e-08	0.51
ETF1	SE	chr5	-	137846253	137846291	137844357	137844505	137846733	137846967	4.74008e-08	0.149
TMEM126A	SE	chr11	+	85361292	85361385	85358962	85359133	85365106	85365300	4.76284e-08	0.353
TM9SF2	SE	chr13	+	100191699	100191811	100189992	100190117	100192967	100193047	4.8358e-08	0.112
SEC23A	SE	chr14	-	39506669	39506757	39501122	39502532	39508234	39508300	4.87137e-08	-0.232
GRSF1	SE	chr4	-	71697255	71697351	71693568	71693753	71698023	71698167	4.96713e-08	0.224
HIPK1	SE	chr1	+	114497272	114497392	114495387	114495511	114498184	114498271	5.24169e-08	0.265
PSIP1	SE	chr9	-	15470992	15471229	15469935	15469991	15472629	15472835	5.43553e-08	-0.141
DHX36	SE	chr3	-	154024004	154024084	154022878	154022957	154027441	154027612	5.43961e-08	0.132
SLMAP	SE	chr3	+	57881973	57882098	57875767	57875827	57882237	57882318	5.54842e-08	-0.49
PARVG	SE	chr22	+	44582456	44582596	44581687	44581752	44583655	44583758	5.57841e-08	-0.206
EMC7	SE	chr15	-	34388095	34388210	34382517	34382656	34393804	34394053	6.01602e-08	0.225
SF3B1	SE	chr2	-	198284901	198284955	198283232	198283312	198285151	198285266	6.10541e-08	0.141
SREBF1	SE	chr17	-	17720861	17720901	17720569	17720771	17721009	17721230	6.57373e-08	-0.117
CCDC88C	SE	chr14	-	91747505	91747652	91745581	91745650	91747800	91747869	6.6353e-08	-0.11
ARGLU1	SE	chr13	-	107209906	107209962	107209395	107209479	107211779	107212005	7.28855e-08	-0.107
CCSER2	SE	chr10	+	86198037	86198133	86185486	86185649	86198267	86198463	7.35874e-08	-0.272
CTLA4	SE	chr2	+	204736100	204736150	204735308	204735656	204737430	204738683	7.38062e-08	0.405
PRKCD	SE	chr3	+	53215234	53215283	53213592	53213792	53215459	53215622	7.41238e-08	0.377
CCDC47	SE	chr17	-	61830250	61830427	61830100	61830159	61831792	61831878	7.68305e-08	-0.204
SH2B1	SE	chr16	+	28876118	28876221	28875077	28875266	28877332	28878354	7.74073e-08	-0.12
WDR70	SE	chr5	+	37688011	37688109	37605165	37605340	37697756	37697856	7.84824e-08	-0.238
WSB1	SE	chr17	+	25637086	25637200	25636125	25636298	25638534	25638642	9.07676e-08	0.212
EIF6	SE	chr20	-	33871978	33872295	33867744	33867921	33872528	33872619	9.12203e-08	0.134
MIER1	SE	chr1	+	67428770	67428843	67425361	67425426	67436490	67436642	9.20979e-08	0.155
ANKRA2	SE	chr5	-	72850949	72851162	72850685	72850811	72851312	72851410	9.68376e-08	-0.162
TMC6	SE	chr17	-	76117636	76117792	76109628	76109705	76118685	76118830	9.89874e-08	0.105
IRF1	SE	chr5	-	131821358	131821408	131820053	131820189	131822248	131822331	9.92427e-08	0.105
TMEM183A	SE	chr1	+	202976901	202976991	202976533	202976702	202977770	202977938	9.98369e-08	0.109
UQCRC1	SE	chr3	-	48637914	48638000	48637495	48637584	48638112	48638273	1.03844e-07	0.212
PARP8	SE	chr5	+	50056125	50056196	50055476	50055566	50057654	50057732	1.08205e-07	0.165
NBR1	SE	chr17	+	41355697	41355803	41353702	41353797	41361919	41363708	1.10996e-07	0.328
TIMM44	SE	chr19	-	7999949	8000030	7998973	7999123	8002911	8003082	1.16905e-07	0.125
SSBP3	SE	chr1	-	54722799	54722859	54717466	54717533	54747110	54747200	1.18375e-07	0.114
PACSIN2	SE	chr22	-	43272893	43273016	43272142	43272339	43275053	43275175	1.2089e-07	0.453
POLR2A	SE	chr17	+	7412713	7412951	7412262	7412509	7414533	7414638	1.22615e-07	0.128
NIPAL3	SE	chr1	+	24784223	24784323	24782627	24782763	24785377	24785466	1.30474e-07	-0.163
MX2	SE	chr21	+	42771122	42771264	42770823	42770946	42775193	42775270	1.31575e-07	0.258
DOCK11	SE	chrX	+	117816621	117816676	117815656	117815757	117817041	117817180	1.32738e-07	-0.103
KCTD2	SE	chr17	+	73057230	73057391	73055604	73055700	73058214	73058340	1.32738e-07	-0.196
GPBP1	SE	chr5	+	56532939	56532999	56531792	56531859	56542126	56542311	1.35389e-07	0.174
HNRNPR	SE	chr1	-	23650048	23650225	23648020	23648156	23664246	23664354	1.37079e-07	0.224
CYP51A1	SE	chr7	-	91761087	91761186	91758193	91758370	91763486	91763840	1.37079e-07	0.573
MED15	SE	chr22	+	20936984	20937034	20922807	20922918	20937126	20937254	1.42255e-07	0.14
UNC119	SE	chr17	-	26875609	26875723	26874694	26874867	26879355	26879646	1.48636e-07	0.147
FKBP11	SE	chr12	-	49318828	49318905	49318343	49318431	49319082	49319330	1.48902e-07	0.178
HSD17B4	SE	chr5	+	118866960	118867099	118865588	118865675	118872117	118872245	1.50137e-07	0.436
BAG1	SE	chr9	-	33262102	33262233	33261084	33261167	33262699	33262828	1.50257e-07	-0.136
LUC7L	SE	chr16	-	277412	277489	277240	277335	278331	278401	1.5467e-07	-0.365
PCSK7	SE	chr11	-	117079612	117079792	117078685	117078780	117089181	117089284	1.56693e-07	0.198
PCSK7	SE	chr11	-	117079612	117079762	117078685	117078780	117089181	117089284	1.57809e-07	0.2
SP1	SE	chr12	+	53775673	53775767	53775442	53775597	53775893	53777406	1.62592e-07	-0.158
PRPS1	SE	chrX	+	106885595	106885720	106884131	106884230	106888406	106888580	1.63099e-07	0.118
CSE1L	SE	chr20	+	47708582	47708664	47707473	47707559	47710676	47710823	1.67716e-07	0.381
UBE2Q2	SE	chr15	+	76181191	76181429	76175706	76175765	76182775	76182824	1.7092e-07	-0.273
CLDND1	SE	chr3	-	98240173	98240286	98237728	98237839	98241692	98241910	1.71828e-07	-0.104
CD28	SE	chr2	+	204594370	204594495	204591673	204591712	204599506	204603636	1.81209e-07	0.396
WAC	SE	chr10	+	28884661	28884970	28879648	28879761	28897114	28897360	1.83228e-07	-0.154
SRP68	SE	chr17	-	74046508	74046607	74043986	74044051	74053483	74053624	1.89557e-07	0.165
CAPRIN1	SE	chr11	+	34119244	34119308	34118742	34118843	34120849	34124157	1.9005e-07	0.103
H2AFY	SE	chr5	-	134686512	134686603	134681657	134681747	134696186	134696288	2.01468e-07	0.266
PER1	SE	chr17	-	8050214	8050320	8049911	8050083	8050567	8050699	2.02648e-07	0.238
POLR2B	SE	chr4	+	57873109	57873168	57871765	57871885	57876526	57876670	2.06252e-07	0.322
USP16	SE	chr21	+	30422412	30422499	30421081	30421176	30426122	30426279	2.06593e-07	0.113
G3BP2	SE	chr4	-	76571521	76571640	76567952	76570886	76572212	76572337	2.07584e-07	0.189
KDM3B	SE	chr5	+	137764378	137764490	137763655	137763775	137765514	137765654	2.08272e-07	-0.144
GOLGA4	SE	chr3	+	37388683	37388787	37381614	37381690	37396591	37396678	2.20315e-07	0.223
COPG1	SE	chr3	+	128987337	128987463	128986712	128986883	128987774	128987843	2.27093e-07	0.147
SMIM12	SE	chr1	-	35322786	35322897	35315962	35321583	35325277	35325417	2.27534e-07	-0.102
TRAPPC11	SE	chr4	+	184622849	184622961	184618831	184618988	184626131	184626223	2.29687e-07	0.361
WBSCR22	SE	chr7	+	73111685	73111846	73108321	73108380	73111934	73112024	2.3431e-07	-0.17
APH1B	SE	chr15	+	63578756	63578827	63571359	63571530	63597812	63601325	2.34568e-07	0.444
EIF4E3	SE	chr3	-	71759562	71759635	71739160	71739316	71774342	71774526	2.396e-07	0.164
DNTTIP1	SE	chr20	+	44430637	44430696	44430040	44430097	44431971	44432017	2.396e-07	0.253
RAB27A	SE	chr15	-	55581649	55581748	55526979	55527154	55581913	55582013	2.41234e-07	-0.385
ETFA	SE	chr15	-	76602272	76602405	76584959	76585041	76603690	76603810	2.43483e-07	0.109
RBM14	SE	chr11	+	66385966	66386032	66384052	66384528	66391684	66393149	2.44028e-07	-0.104
KLHDC2	SE	chr14	+	50246930	50247040	50246465	50246524	50247420	50247493	2.49014e-07	0.132
SUFU	SE	chr10	+	104359189	104359301	104356896	104357050	104375024	104375159	2.51654e-07	0.355
CDK19	SE	chr6	-	110944492	110944565	110944017	110944115	110947978	110948048	2.52423e-07	0.601
AGPAT6	SE	chr8	+	41468254	41468329	41467173	41467474	41469421	41469511	2.5734e-07	0.268
PAPOLA	SE	chr14	+	97026985	97027048	97022511	97022750	97029155	97029230	2.59236e-07	0.138
TAP1	SE	chr6	-	32816766	32816895	32816428	32816617	32818096	32818294	2.65012e-07	0.142
MX1	SE	chr21	+	42821063	42821222	42817926	42818068	42823093	42823170	2.73867e-07	0.266
RASGRP1	SE	chr15	-	38793575	38793641	38793343	38793488	38794512	38794622	2.74746e-07	-0.122
ARHGAP1	SE	chr11	-	46703600	46703732	46702842	46702929	46709722	46709810	2.76936e-07	0.132
PLEKHM1	SE	chr17	-	43559798	43559891	43555265	43555513	43568017	43568146	2.82437e-07	0.188
ATG9A	SE	chr2	-	220093155	220093207	220092643	220092775	220094256	220094410	2.84735e-07	0.334
BIN3	SE	chr8	-	22494037	22494099	22487954	22488091	22494434	22494475	2.84735e-07	0.221
APPL1	SE	chr3	+	57287709	57287766	57286296	57286339	57290984	57291079	2.84735e-07	0.194
RAB18	SE	chr10	+	27815756	27815818	27798803	27798859	27822663	27822782	2.90296e-07	0.187
KTN1	SE	chr14	+	56130672	56130759	56128239	56128330	56133958	56134048	2.92808e-07	0.221
SYVN1	SE	chr11	-	64899718	64899822	64898940	64899067	64900202	64900251	3.14416e-07	0.146
PCSK7	SE	chr11	-	117079612	117079765	117078685	117078780	117089181	117089284	3.14826e-07	0.199
TNRC6B	SE	chr22	+	40677122	40677293	40675998	40676147	40681648	40681774	3.15636e-07	-0.238
PARVG	SE	chr22	+	44582456	44582521	44581687	44581752	44583655	44583758	3.22594e-07	-0.196
SERPINB9	SE	chr6	-	2893644	2893787	2892066	2892222	2895624	2895742	3.23988e-07	0.307
UBE2J2	SE	chr1	-	1191424	1191505	1189291	1190867	1192371	1192510	3.29796e-07	0.153
SH3BP5	SE	chr3	-	15301267	15301310	15300337	15300557	15303665	15303796	3.29937e-07	0.135
TMX1	SE	chr14	+	51714658	51714739	51713809	51713938	51716043	51716089	3.40965e-07	-0.159
VCL	SE	chr10	+	75823440	75823555	75802840	75802911	75830427	75830578	3.48163e-07	-0.189
TIMM44	SE	chr19	-	7999949	8000051	7998973	7999123	8002911	8003082	3.48644e-07	0.207
WIPF2	SE	chr17	+	38418776	38418893	38416786	38416919	38420741	38421398	3.56089e-07	0.405
INIP	SE	chr9	-	115479652	115479755	115478740	115478821	115480266	115480387	3.62466e-07	-0.226
PLEKHM1	SE	chr17	-	43559802	43559891	43555265	43555513	43568017	43568146	3.62474e-07	0.109
CCSER2	SE	chr10	+	86232787	86232902	86230127	86230214	86237330	86237420	3.65406e-07	-0.14
GBP3	SE	chr1	-	89479221	89479454	89478867	89479110	89479765	89479962	3.9653e-07	-0.217
PPP4C	SE	chr16	+	30092520	30092631	30087638	30087796	30093804	30093855	3.98227e-07	0.114
MTMR6	SE	chr13	-	25846168	25846243	25841916	25842079	25848208	25848325	4.03115e-07	-0.102
FN3KRP	SE	chr17	+	80677170	80677417	80676781	80676933	80678147	80678239	4.03702e-07	-0.131
BCLAF1	SE	chr6	-	136590278	136590441	136589299	136589477	136590574	136590750	4.07495e-07	-0.214
AKAP9	SE	chr7	+	91671359	91671500	91669987	91670212	91671981	91672085	4.10357e-07	-0.259
PIGT	SE	chr20	+	44047491	44047619	44045284	44045334	44047934	44048035	4.32097e-07	0.262
ABR	SE	chr17	-	914384	914628	913968	914103	915085	915225	4.51103e-07	-0.192
FKBP11	SE	chr12	-	49318828	49318949	49318343	49318431	49319082	49319330	4.54123e-07	0.191
WBSCR22	SE	chr7	+	73111795	73111846	73108321	73108380	73111934	73112024	4.54123e-07	-0.138
TRIM14	SE	chr9	-	100872350	100872516	100872170	100872266	100881263	100881635	4.58147e-07	-0.196
CTC1	SE	chr17	-	8135937	8136013	8135678	8135793	8136223	8136350	4.58147e-07	-0.154
LBR	SE	chr1	-	225597992	225598118	225594365	225594534	225600155	225600347	4.67376e-07	0.165
CDK19	SE	chr6	-	110944492	110944681	110944017	110944115	110947978	110948048	4.68582e-07	0.69
NARS	SE	chr18	-	55287800	55287883	55283048	55283207	55288939	55289177	4.69773e-07	0.106
PMS2CL	SE	chr7	+	6779804	6779955	6776706	6777567	6781315	6781483	4.93591e-07	-0.238
C9orf89	SE	chr9	+	95874499	95874571	95858449	95858634	95875273	95875565	5.07914e-07	0.101
RAB1A	SE	chr2	-	65316072	65316204	65313987	65315824	65325104	65325200	5.12452e-07	0.144
PRKCQ	SE	chr10	-	6472771	6472900	6469104	6470324	6498635	6498774	5.34676e-07	0.22
SLC12A9	SE	chr7	+	100454255	100454344	100453289	100453459	100454489	100454798	5.36413e-07	-0.157
MYADM	SE	chr19	+	54373057	54373092	54371118	54371197	54376781	54379689	5.45019e-07	0.196
MOB4	SE	chr2	+	198388347	198388410	198380766	198380870	198400253	198400354	5.50407e-07	0.299
DOCK10	SE	chr2	-	225639621	225639790	225637873	225638064	225642854	225643001	5.55764e-07	0.113
COPS8	SE	chr2	+	237995769	237995840	237994083	237994685	237997247	237997296	5.56866e-07	0.462
LRCH4	SE	chr7	-	100174895	100174963	100174708	100174777	100175119	100175181	5.60854e-07	-0.102
TBC1D4	SE	chr13	-	75884602	75884824	75884077	75884287	75886873	75887034	5.6851e-07	-0.107
PYROXD1	SE	chr12	+	21605014	21605088	21602496	21602625	21608065	21608226	5.72376e-07	0.415
CAPRIN1	SE	chr11	+	34118742	34118847	34118052	34118220	34119244	34119308	5.86781e-07	0.27
VCL	SE	chr10	+	75823443	75823555	75802840	75802911	75830427	75830578	5.96163e-07	-0.239
TMC6	SE	chr17	-	76117093	76117245	76109628	76109705	76118685	76118830	6.02633e-07	0.455
TNFSF12-TNFSF13	SE	chr17	+	7463162	7463210	7454259	7454295	7463365	7463484	6.1377e-07	0.298
LBR	SE	chr1	-	225599038	225599142	225594463	225594534	225600155	225600347	6.16782e-07	0.21
HSPA9	SE	chr5	-	137909756	137909810	137909451	137909539	137910926	137911318	6.4093e-07	0.286
TWF1	SE	chr12	-	44199633	44199688	44198297	44198375	44200023	44200178	6.42851e-07	-0.213
MRPL22	SE	chr5	+	154330380	154330498	154320776	154320825	154335930	154335996	6.60966e-07	0.258
SEC23A	SE	chr14	-	39506669	39506812	39501122	39502532	39508234	39508300	6.83673e-07	-0.241
PRDX3	SE	chr10	-	120936532	120936665	120933248	120933384	120938266	120938377	6.91156e-07	0.292
CCNT2	SE	chr2	+	135703356	135703552	135700181	135700244	135703670	135703716	6.92856e-07	-0.536
RPS6KA3	SE	chrX	-	20186953	20187107	20185706	20185865	20187519	20187609	6.96673e-07	-0.123
TTC39C	SE	chr18	+	21698088	21698196	21694517	21694611	21703797	21703907	7.18687e-07	0.218
KLF6	SE	chr10	-	3822297	3822421	3818187	3821782	3823832	3824406	7.43752e-07	0.252
ITGA6	SE	chr2	+	173332208	173332288	173330266	173330391	173333852	173334108	7.47759e-07	0.242
PPP6C	SE	chr9	-	127923119	127923185	127916184	127916264	127933363	127933459	7.54162e-07	0.249
PSME4	SE	chr2	-	54097964	54098085	54096512	54096675	54101475	54101631	7.88217e-07	-0.318
ABCF3	SE	chr3	+	183905184	183905231	183904583	183904663	183905451	183905549	7.98628e-07	0.205
N4BP2L2	SE	chr13	-	33101544	33101669	33096318	33096407	33109905	33111164	8.35766e-07	0.167
HM13	SE	chr20	+	30154012	30154098	30149436	30149539	30156922	30157370	8.64151e-07	0.174
OSBPL8	SE	chr12	-	76767123	76767213	76765227	76765364	76769052	76769150	8.88468e-07	0.138
USP38	SE	chr4	+	144130716	144130810	144127185	144127379	144133470	144133577	9.48181e-07	0.366
ZBTB11	SE	chr3	-	101372916	101373150	101371623	101371782	101373547	101373665	9.51688e-07	-0.167
RAB1A	SE	chr2	-	65318116	65318212	65313987	65315824	65325104	65325200	9.66297e-07	0.126
MRPL55	SE	chr1	-	228296141	228296175	228295935	228296019	228296655	228296722	9.74334e-07	-0.304
TLE4	SE	chr9	+	82334487	82334649	82333636	82333886	82334960	82335208	1.00001e-06	-0.106
CECR5	SE	chr22	-	17622282	17622517	17621948	17622123	17623987	17624021	1.00631e-06	-0.11
OSBP	SE	chr11	-	59361076	59361197	59348923	59349027	59361482	59361728	1.09011e-06	0.291
CTLA4	SE	chr2	+	204736100	204736210	204735308	204735656	204737430	204738683	1.11635e-06	0.294
YWHAZ	SE	chr8	-	101964156	101964353	101960823	101961128	101965496	101965623	1.11635e-06	0.149
YWHAZ	SE	chr8	-	101964156	101964356	101960823	101961128	101965496	101965623	1.16202e-06	0.149
KIAA1429	SE	chr8	-	95560378	95560433	95556054	95556170	95565612	95565746	1.1723e-06	-0.171
NCSTN	SE	chr1	+	160325652	160325748	160324012	160324080	160326049	160326137	1.2196e-06	0.244
UTRN	SE	chr6	+	144768346	144768454	144765416	144765518	144768737	144768917	1.22052e-06	0.114
RCOR3	SE	chr1	+	211486241	211486303	211477424	211477482	211486765	211489725	1.2309e-06	-0.426
C9orf142	SE	chr9	+	139887376	139887426	139887091	139887156	139887504	139887695	1.23315e-06	0.226
TFCP2	SE	chr12	-	51497937	51497986	51497452	51497546	51500307	51500396	1.28142e-06	0.194
CNPPD1	SE	chr2	-	220038867	220038929	220038071	220038189	220039499	220039628	1.29436e-06	0.126
HSPA9	SE	chr5	-	137902314	137902403	137897268	137897478	137902689	137902794	1.29736e-06	0.288
SYTL1	SE	chr1	+	27676462	27676623	27675868	27675989	27676879	27676976	1.31052e-06	0.141
ADNP	SE	chr20	-	49518553	49518646	49505454	49511049	49520425	49520538	1.31085e-06	0.258
NR4A1	SE	chr12	+	52451135	52451314	52450840	52451043	52452471	52453291	1.32184e-06	-0.127
POLD4	SE	chr11	-	67120834	67120903	67120458	67120548	67121009	67121067	1.33072e-06	0.228
NCSTN	SE	chr1	+	160325444	160325547	160324012	160324080	160326049	160326137	1.39981e-06	0.324
SRPRB	SE	chr3	+	133529960	133530043	133526589	133526667	133534433	133534570	1.41754e-06	0.396
RHBDD2	SE	chr7	+	75510682	75510804	75508316	75508578	75511146	75511554	1.44298e-06	0.154
CLASP1	SE	chr2	-	122145163	122145230	122144697	122144804	122145338	122145482	1.44903e-06	-0.1
PRKAA1	SE	chr5	-	40775029	40775074	40771820	40771965	40775511	40775605	1.48098e-06	0.174
ERP29	SE	chr12	+	112457559	112457698	112451257	112451413	112459953	112461024	1.50744e-06	0.117
CIB1	SE	chr15	-	90776374	90776440	90775450	90775679	90776900	90776935	1.50861e-06	0.641
DNAJB11	SE	chr3	+	186299159	186299302	186295488	186295589	186299783	186299866	1.52473e-06	0.105
CD55	SE	chr1	+	207520791	207520906	207512741	207512762	207532890	207534311	1.63749e-06	-0.186
GK	SE	chrX	+	30745582	30745669	30742217	30742298	30746848	30749577	1.6658e-06	-0.512
U2AF1	SE	chr21	-	44515547	44515643	44514764	44514898	44515803	44515853	1.69574e-06	0.244
NFRKB	SE	chr11	-	129747219	129747280	129746615	129746790	129748203	129748250	1.74407e-06	0.211
VIPR1	SE	chr3	+	42576834	42576876	42576466	42576596	42577581	42579065	1.76641e-06	0.109
SAFB	SE	chr19	+	5641750	5641961	5641604	5641669	5645347	5645410	1.80248e-06	-0.106
USP12	SE	chr13	-	27645207	27645286	27640286	27643521	27649327	27649525	1.80248e-06	0.317
RNPS1	SE	chr16	-	2314573	2314761	2314176	2314332	2318055	2318413	1.80309e-06	-0.222
NR4A1	SE	chr12	+	52451246	52451314	52450840	52451043	52452471	52453291	1.82257e-06	-0.248
RBM39	SE	chr20	-	34328446	34328519	34326889	34326939	34328745	34328809	1.86774e-06	0.255
FLNA	SE	chrX	-	153585618	153585642	153583192	153583440	153585801	153585991	1.89973e-06	-0.135
PER1	SE	chr17	-	8052576	8052622	8051961	8052104	8052779	8052981	1.90728e-06	0.169
PSPC1	SE	chr13	-	20283681	20283739	20279801	20279971	20304378	20304484	1.91096e-06	0.14
RBX1	SE	chr22	+	41349558	41349637	41347350	41347480	41360050	41360121	1.91976e-06	0.169
RCOR3	SE	chr1	+	211486061	211486303	211477424	211477482	211486765	211489725	1.94119e-06	-0.405
LOC100630923	SE	chr7	+	102045044	102045130	102039994	102040095	102065460	102067129	1.96017e-06	0.23
SH2B1	SE	chr16	+	28876118	28876221	28874988	28875075	28877332	28878354	1.96185e-06	-0.334
TANK	SE	chr2	+	162017795	162017923	162016938	162016997	162036124	162036272	2.01342e-06	-0.121
CASP3	SE	chr4	-	185556447	185556572	185553421	185553550	185559554	185559622	2.02631e-06	0.138
ADD3	SE	chr10	+	111892073	111892158	111890120	111890244	111893083	111895323	2.15551e-06	-0.108
AKAP13	SE	chr15	+	86205618	86205684	86198647	86199018	86207793	86207986	2.16303e-06	0.354
NARS	SE	chr18	-	55287800	55287880	55283048	55283207	55288939	55289177	2.18735e-06	0.162
TNIP2	SE	chr4	-	2746444	2746672	2746113	2746233	2747172	2747262	2.26876e-06	-0.336
MAP3K1	SE	chr5	+	56152426	56152577	56110899	56111882	56155541	56155742	2.33016e-06	0.103
SDHAP1	SE	chr3	-	195713389	195713475	195712497	195712660	195717060	195717150	2.43887e-06	0.569
FAS	SE	chr10	+	90768645	90768754	90767456	90767594	90770295	90770357	2.43887e-06	0.277
SAR1A	SE	chr10	-	71922445	71922515	71921613	71921687	71930168	71930285	2.53649e-06	-0.225
PITPNM1	SE	chr11	-	67271207	67271347	67269974	67270189	67271573	67271692	2.54096e-06	-0.122
PKD1	SE	chr16	-	2152061	2152257	2150396	2150567	2152381	2152634	2.68412e-06	-0.125
MVP	SE	chr16	+	29845683	29845758	29845255	29845387	29847024	29847119	2.73214e-06	-0.14
PCIF1	SE	chr20	+	44574349	44574522	44573506	44573669	44574667	44574754	2.76787e-06	0.255
TBC1D4	SE	chr13	-	75884602	75884847	75884077	75884287	75886873	75887034	2.79234e-06	-0.104
CD47	SE	chr3	-	107769424	107769449	107761940	107766139	107770785	107770817	2.84191e-06	-0.244
PUM1	SE	chr1	-	31452908	31453010	31447497	31447649	31454158	31454252	2.87464e-06	0.315
ERP29	SE	chr12	+	112457559	112457685	112451151	112451413	112459953	112461024	2.88615e-06	0.141
ZMYM6	SE	chr1	-	35478264	35478340	35478031	35478182	35480297	35480489	2.90625e-06	-0.504
CPD	SE	chr17	+	28770819	28770989	28769325	28769468	28772708	28773038	2.97267e-06	0.295
ANKRD11	SE	chr16	-	89358088	89358185	89357420	89357591	89371613	89371752	2.97267e-06	0.105
IFNGR2	SE	chr21	+	34799190	34799251	34793786	34793992	34804483	34804643	2.98594e-06	0.127
NDUFS2	SE	chr1	+	161179900	161179978	161179646	161179721	161180093	161180179	3.00327e-06	0.156
SDHAF2	SE	chr11	+	61205475	61205585	61197596	61197654	61213412	61214239	3.01268e-06	-0.308
ZC3HAV1	SE	chr7	-	138765326	138765526	138764215	138764989	138768525	138768778	3.05225e-06	-0.103
U2AF1	SE	chr21	-	44515557	44515646	44514764	44514898	44515803	44515853	3.09126e-06	0.347
USP48	SE	chr1	-	22052983	22053129	22050390	22050588	22055062	22055212	3.09126e-06	-0.14
MED6	SE	chr14	-	71059596	71059726	71057982	71058098	71060012	71060095	3.09126e-06	0.389
CCNDBP1	SE	chr15	+	43486278	43486335	43484940	43485001	43486612	43486659	3.13028e-06	0.115
CMTM7	SE	chr3	+	32490945	32491044	32483331	32483505	32493883	32493965	3.24179e-06	0.13
BAZ1A	SE	chr14	-	35255331	35255427	35254982	35255207	35261980	35262127	3.24179e-06	0.192
NDUFB4	SE	chr3	+	120320019	120320104	120315127	120315386	120321054	120321258	3.24208e-06	0.174
PCIF1	SE	chr20	+	44574351	44574522	44573506	44573669	44574667	44574754	3.32077e-06	0.304
SHISA5	SE	chr3	-	48514418	48514511	48511085	48511242	48520585	48520666	3.339e-06	-0.115
PICALM	SE	chr11	-	85701292	85701442	85694908	85695016	85707868	85707972	3.34927e-06	-0.295
NKAP	SE	chrX	-	119072692	119072773	119070574	119070645	119077182	119077735	3.35833e-06	0.229
TANK	SE	chr2	+	162060661	162060754	162059997	162060106	162061185	162061304	3.38769e-06	-0.145
ARID1B	SE	chr6	+	157519944	157520041	157517298	157517449	157521838	157522622	3.40006e-06	0.2
RBM34	SE	chr1	-	235298966	235299082	235294497	235295312	235299348	235299388	3.41339e-06	0.153
HNRNPR	SE	chr1	-	23660010	23660124	23648020	23648156	23664246	23664354	3.41653e-06	0.219
PPP2R5A	SE	chr1	+	212516814	212516967	212515529	212515622	212519144	212519275	3.42337e-06	-0.128
CASP4	SE	chr11	-	104821651	104821825	104820269	104820504	104825473	104825728	3.47763e-06	-0.127
CAMK4	SE	chr5	+	110814078	110814205	110809008	110809084	110818482	110818635	3.49615e-06	0.106
PEX19	SE	chr1	-	160253319	160253429	160252733	160252899	160254844	160254941	3.5162e-06	0.208
NPTN	SE	chr15	-	73866002	73866136	73862490	73862764	73879864	73879959	3.54291e-06	0.1
DHRS13	SE	chr17	-	27226144	27226360	27224798	27225910	27228007	27228319	3.54925e-06	-0.522
GPBP1	SE	chr5	+	56517202	56517223	56509900	56510020	56526672	56526796	3.55485e-06	-0.227
ILK	SE	chr11	+	6630301	6630387	6630114	6630198	6630529	6630639	3.56302e-06	0.105
CNOT1	SE	chr16	-	58587685	58587764	58585492	58585723	58589154	58589441	3.61591e-06	0.119
PPTC7	SE	chr12	-	110975948	110976078	110972236	110974900	110977626	110977750	3.62121e-06	0.304
LUC7L3	SE	chr17	+	48828657	48828736	48827861	48828055	48829560	48830072	3.68752e-06	-0.125
CARS	SE	chr11	-	3039086	3039184	3038335	3038525	3039637	3039741	3.69997e-06	0.115
KDM5A	SE	chr12	-	465597	465703	464323	464415	472128	472263	3.71877e-06	0.138
CDC5L	SE	chr6	+	44400089	44400292	44397449	44397647	44413391	44413604	3.87602e-06	-0.103
BANP	SE	chr16	+	87985786	87985879	87985037	87985121	88008653	88008791	3.91692e-06	-0.194
CD53	SE	chr1	+	111440430	111440514	111434013	111434093	111441745	111442558	3.94343e-06	0.259
TSFM	SE	chr12	+	58186768	58186856	58180822	58180945	58189959	58191370	3.94769e-06	0.374
CIRBP	SE	chr19	+	1272425	1272517	1271979	1272050	1274305	1274808	3.98153e-06	0.112
DDX47	SE	chr12	+	12974588	12974660	12967074	12967158	12974898	12975017	4.05588e-06	0.193
TRAK2	SE	chr2	-	202259520	202259595	202257631	202257769	202260036	202260167	4.07459e-06	0.115
FLOT2	SE	chr17	-	27211242	27211333	27210125	27210249	27215962	27216044	4.16903e-06	0.132
TSN	SE	chr2	+	122520580	122520660	122516285	122516382	122522709	122525428	4.23922e-06	0.206
SH3TC1	SE	chr4	+	8238026	8238155	8237159	8237282	8239200	8239397	4.29861e-06	0.309
CLK2	SE	chr1	-	155238498	155238583	155238083	155238150	155239278	155239507	4.31052e-06	-0.35
NAT10	SE	chr11	+	34159293	34159384	34158524	34158573	34160737	34160834	4.38857e-06	-0.225
ZC3H7A	SE	chr16	-	11862886	11862951	11862170	11862357	11864638	11864843	4.39222e-06	0.192
XRN1	SE	chr3	-	142136355	142136450	142135981	142136071	142137345	142137451	4.39222e-06	-0.164
D2HGDH	SE	chr2	+	242693493	242693604	242690660	242690803	242694045	242694161	4.40678e-06	0.19
TMEM9B	SE	chr11	-	8983638	8983730	8977736	8977845	8985755	8986320	4.42362e-06	0.29
KIF5B	SE	chr10	-	32327705	32327754	32327090	32327146	32328254	32328359	4.47283e-06	0.191
WRNIP1	SE	chr6	+	2773221	2773375	2770353	2770595	2779496	2779726	4.62228e-06	-0.277
KLHL18	SE	chr3	+	47328709	47328838	47324329	47324584	47361142	47361273	4.63736e-06	-0.262
TRPM7	SE	chr15	-	50880387	50880447	50878588	50878685	50881788	50881853	4.63801e-06	0.21
CCND3	SE	chr6	-	41908107	41908353	41904972	41905132	42016238	42016632	4.67504e-06	0.164
DNAJC13	SE	chr3	+	132213931	132214010	132212987	132213103	132215371	132215507	4.67718e-06	0.246
CIRBP	SE	chr19	+	1272425	1272522	1271979	1272050	1274305	1274808	4.80583e-06	0.112
SIK3	SE	chr11	-	116732556	116732642	116731989	116732099	116732917	116733043	4.82513e-06	0.22
WDR45B	SE	chr17	-	80583264	80583359	80579484	80579675	80585079	80585167	4.96243e-06	0.103
C1orf174	SE	chr1	-	3808151	3808343	3807132	3807621	3809446	3809560	5.09402e-06	-0.117
NFYC	SE	chr1	+	41232589	41232646	41232267	41232375	41235027	41235087	5.14585e-06	-0.254
PUM1	SE	chr1	-	31452908	31453013	31447497	31447649	31454158	31454252	5.25816e-06	0.343
VAPB	SE	chr20	+	57009479	57009562	56993247	56993419	57009657	57009761	5.32025e-06	-0.234
KIAA0430	SE	chr16	-	15694497	15694558	15694284	15694410	15695847	15696060	5.32882e-06	0.233
INPP5A	SE	chr10	+	134594352	134594421	134591174	134591286	134595364	134595401	5.37039e-06	0.455
YME1L1	SE	chr10	-	27415624	27415715	27412475	27412628	27420787	27420870	5.43196e-06	0.137
CRELD1	SE	chr3	+	9985677	9985779	9985064	9985199	9986048	9987097	5.51227e-06	-0.177
HDAC10	SE	chr22	-	50687531	50687597	50686794	50686901	50687756	50687883	5.53569e-06	0.127
KTN1	SE	chr14	+	56133958	56134048	56128239	56128330	56137446	56137527	5.55108e-06	0.122
SIK3	SE	chr11	-	116824759	116824823	116797934	116798096	116827663	116827780	5.58266e-06	0.143
GANAB	SE	chr11	-	62394519	62394618	62394331	62394406	62394760	62394825	5.60347e-06	0.143
MED6	SE	chr14	-	71059596	71059705	71057982	71058098	71060012	71060095	5.68032e-06	0.248
DENND4B	SE	chr1	-	153903498	153903540	153903014	153903079	153904679	153904916	5.75115e-06	0.125
UBE2B	SE	chr5	+	133716409	133716499	133710073	133710154	133724015	133724104	5.77911e-06	0.162
XRN1	SE	chr3	-	142136311	142136450	142135981	142136071	142137345	142137451	5.9783e-06	-0.181
HDAC4	SE	chr2	-	240005850	240005938	240003797	240003917	240009254	240009310	5.97983e-06	0.237
YPEL5	SE	chr2	+	30378680	30378776	30369749	30369928	30379493	30379658	6.24843e-06	-0.109
MRTO4	SE	chr1	+	19581275	19581334	19578074	19578357	19582441	19582545	6.29942e-06	0.214
SHC1	SE	chr1	-	154945768	154945984	154941853	154941924	154946723	154946959	6.37322e-06	-0.416
SRRD	SE	chr22	+	26884355	26884454	26883994	26884254	26886990	26887036	6.49304e-06	0.419
CHD2	SE	chr15	+	93534922	93535063	93534705	93534747	93536088	93536228	6.54629e-06	-0.231
COX20	SE	chr1	+	245005245	245005360	244998638	244999058	245005496	245005560	6.61902e-06	0.215
MARK3	SE	chr14	+	103931760	103931787	103928741	103928798	103931893	103932130	6.61902e-06	-0.255
MBTD1	SE	chr17	-	49270788	49270871	49270142	49270377	49272574	49272722	6.61902e-06	0.377
HAUS8	SE	chr19	-	17179840	17179896	17170806	17170902	17184083	17184145	7.02846e-06	0.329
LRPPRC	SE	chr2	-	44117361	44117501	44116872	44117015	44121683	44121768	7.23848e-06	-0.159
SERINC5	SE	chr5	-	79465157	79465369	79462205	79462301	79470776	79470870	7.36047e-06	-0.169
ADAM19	SE	chr5	-	156926580	156926670	156923901	156924097	156936308	156936475	7.3788e-06	0.168
LRRC8C	SE	chr1	+	90152028	90152170	90098643	90098881	90178267	90185094	7.54982e-06	0.192
PHF10	SE	chr6	-	170114828	170114938	170112481	170112635	170115803	170115953	7.70616e-06	0.123
EWSR1	SE	chr22	+	29684576	29684775	29682911	29683123	29687550	29687588	7.74506e-06	0.255
BIN3	SE	chr8	-	22494037	22494176	22487954	22488091	22494434	22494475	7.80119e-06	0.323
EAF1	SE	chr3	+	15473593	15473730	15471419	15471514	15475854	15476045	7.80924e-06	0.306
PFKP	SE	chr10	+	3176700	3176774	3175394	3175506	3177927	3178030	7.95168e-06	0.289
NGDN	SE	chr14	+	23944766	23944851	23944379	23944517	23945237	23945361	7.95168e-06	0.359
ZFAND5	SE	chr9	-	74978385	74978522	74975543	74975703	74979611	74980163	7.98318e-06	0.157
ARHGAP17	SE	chr16	-	24939004	24939053	24930704	24931581	24942104	24942725	8.07549e-06	0.109
ACP2	SE	chr11	-	47266285	47266418	47264789	47264872	47266855	47266973	8.38527e-06	0.439
WDFY2	SE	chr13	+	52328403	52328533	52325445	52325551	52329493	52329595	8.47026e-06	-0.22
AKAP13	SE	chr15	+	86201767	86201821	86198647	86199018	86207793	86207986	8.55056e-06	0.256
G3BP2	SE	chr4	-	76582107	76582198	76580951	76581054	76582740	76582914	8.72144e-06	0.214
USP15	SE	chr12	+	62790115	62790178	62786832	62786982	62794966	62795055	8.84605e-06	0.219
CAPRIN1	SE	chr11	+	34113452	34113603	34112075	34112225	34118025	34118220	8.84605e-06	0.2
NAT10	SE	chr11	+	34159295	34159384	34158524	34158573	34160737	34160834	8.96838e-06	-0.208
ERBB2IP	SE	chr5	+	65364704	65364848	65349233	65350779	65370851	65371058	9.09483e-06	-0.134
MARS	SE	chr12	+	57906085	57906136	57905790	57905886	57906533	57906747	9.14223e-06	0.17
BANF1	SE	chr11	+	65770705	65770800	65769549	65770041	65771096	65771617	9.3907e-06	0.141
CLK3	SE	chr15	+	74914460	74914557	74912318	74912566	74914834	74914965	9.58989e-06	-0.263
TRAPPC4	SE	chr11	+	118890859	118890963	118889852	118890027	118892469	118892596	9.76247e-06	0.249
GSR	SE	chr8	-	30565759	30565889	30565588	30565658	30567330	30567419	9.77115e-06	-0.177
ANAPC5	SE	chr12	-	121769149	121769231	121768385	121768475	121773335	121773526	1.00426e-05	0.141
TSN	SE	chr2	+	122518984	122519100	122516285	122516382	122522709	122525428	1.01484e-05	0.149
SCARB2	SE	chr4	-	77100669	77100858	77097589	77097681	77102106	77102254	1.01971e-05	0.253
EIF2B5	SE	chr3	+	183861229	183861353	183860839	183860930	183861886	183862012	1.03916e-05	0.239
BANF1	SE	chr11	+	65770705	65770846	65769549	65770041	65771096	65771617	1.03936e-05	0.143
DCAF8	SE	chr1	-	160190248	160190392	160188638	160188758	160192440	160192571	1.04938e-05	-0.17
VPS29	SE	chr12	-	110936624	110936661	110933816	110934008	110937339	110937351	1.05833e-05	-0.204
IL4R	SE	chr16	+	27372086	27372136	27370236	27370315	27373572	27376099	1.08014e-05	0.246
ANAPC5	SE	chr12	-	121769154	121769231	121768385	121768475	121773335	121773526	1.08091e-05	0.203
RNF19A	SE	chr8	-	101276261	101276423	101273769	101273983	101276898	101277013	1.08135e-05	0.447
SMURF1	SE	chr7	-	98630394	98630571	98625057	98628306	98630659	98630735	1.08367e-05	-0.145
CD6	SE	chr11	+	60781390	60781486	60778541	60778607	60783184	60783307	1.09525e-05	0.118
DNAJC11	SE	chr1	-	6698534	6698679	6698354	6698424	6699961	6700117	1.09525e-05	-0.132
N4BP1	SE	chr16	-	48585296	48585393	48581917	48582025	48587449	48587580	1.11585e-05	0.22
FAM134C	SE	chr17	-	40738782	40738909	40738070	40738155	40739851	40739882	1.1204e-05	0.231
RPL18A	SE	chr19	+	17972233	17972372	17970686	17970783	17972902	17973032	1.12338e-05	-0.267
EFTUD2	SE	chr17	-	42956923	42957006	42953301	42953468	42957921	42958012	1.1278e-05	0.163
FBXO18	SE	chr10	+	5965583	5965659	5963410	5963532	5966273	5966471	1.14847e-05	0.114
TPD52L2	SE	chr20	+	62507168	62507228	62505020	62505169	62520542	62520591	1.16702e-05	0.198
NSUN2	SE	chr5	-	6602573	6602613	6599351	6600345	6604250	6604389	1.1945e-05	0.181
ERO1B	SE	chr1	-	236413184	236413267	236406721	236406795	236415349	236415391	1.23495e-05	0.185
GNPTG	SE	chr16	+	1411743	1411798	1402264	1402307	1411872	1411956	1.26202e-05	0.102
CDC14A	SE	chr1	+	100964484	100964818	100963640	100963763	100983806	100985833	1.26202e-05	-0.12
PQBP1	SE	chrX	+	48759509	48759661	48759206	48759319	48760008	48760072	1.26561e-05	-0.152
PXK	SE	chr3	+	58406265	58406295	58398627	58398690	58410478	58411854	1.26943e-05	-0.749
RBM39	SE	chr20	-	34328405	34328519	34326889	34326939	34328745	34328809	1.28414e-05	0.241
CD164	SE	chr6	-	109691613	109691670	109687716	109690220	109697276	109697315	1.30121e-05	0.2
PCNX	SE	chr14	+	71515706	71515862	71514523	71514701	71517368	71517477	1.33009e-05	-0.35
ANKRD49	SE	chr11	+	94231070	94231130	94229769	94230117	94231236	94232744	1.33194e-05	-0.35
RABGEF1	SE	chr7	+	66272824	66273042	66270126	66270383	66273872	66276448	1.33511e-05	-0.303
TMEM69	SE	chr1	+	46156645	46156782	46153846	46153947	46158875	46160108	1.33971e-05	0.219
IFI44	SE	chr1	+	79126238	79126339	79124996	79125168	79128388	79128602	1.37642e-05	0.179
NACA	SE	chr12	-	57113509	57115243	57113320	57113380	57118235	57118307	1.40624e-05	-0.515
ILF3	SE	chr19	+	10798021	10798117	10794592	10794646	10799225	10799354	1.41673e-05	-0.123
ANKRD40	SE	chr17	-	48779233	48779369	48777928	48778077	48784881	48785270	1.47129e-05	-0.109
SORL1	SE	chr11	+	121481836	121481867	121478812	121478885	121483444	121483541	1.47979e-05	0.171
SYVN1	SE	chr11	-	64899718	64899779	64898940	64899067	64900202	64900251	1.48987e-05	0.28
CD4	SE	chr12	+	6909237	6909353	6898637	6898828	6923307	6923466	1.49799e-05	0.158
PXK	SE	chr3	+	58406262	58406295	58398627	58398690	58410478	58411854	1.50419e-05	-0.581
ME2	SE	chr18	+	48465939	48466010	48458627	48458730	48466657	48466756	1.51892e-05	0.256
CARM1	SE	chr19	+	11019225	11019309	11018714	11018821	11019778	11019883	1.57094e-05	-0.154
CARM1	SE	chr19	+	11019225	11019344	11018714	11018821	11019778	11019883	1.58153e-05	-0.149
ABI1	SE	chr10	-	27060003	27060018	27059173	27059274	27065993	27066170	1.5816e-05	0.115
IGF2R	SE	chr6	+	160450581	160450687	160448216	160448346	160453582	160453745	1.60306e-05	0.21
AGPAT6	SE	chr8	+	41468117	41468329	41467173	41467474	41469421	41469511	1.62365e-05	0.36
DCAF8	SE	chr1	-	160190248	160190354	160188638	160188758	160192440	160192571	1.65647e-05	-0.171
RPA1	SE	chr17	+	1791968	1792145	1787105	1787238	1795126	1795234	1.65706e-05	0.127
NR2C1	SE	chr12	-	95456625	95456663	95456283	95456514	95461106	95461167	1.69992e-05	0.13
ANAPC5	SE	chr12	-	121769029	121769231	121768385	121768475	121773335	121773526	1.71025e-05	0.198
SRPK2	SE	chr7	-	104773450	104773551	104756820	104758469	104782454	104782937	1.71055e-05	0.388
SORBS3	SE	chr8	+	22420713	22420834	22419377	22419444	22421499	22421590	1.7298e-05	-0.113
OXR1	SE	chr8	+	107704955	107705105	107696473	107696587	107715133	107715318	1.73217e-05	0.208
HNRNPA2B1	SE	chr7	-	26233194	26233314	26232870	26232993	26235466	26235529	1.74351e-05	0.101
GNA12	SE	chr7	-	2773084	2773135	2767740	2771384	2834561	2834777	1.7598e-05	0.199
TIMM44	SE	chr19	-	7999949	8000014	7998973	7999123	8002911	8003082	1.77281e-05	0.247
TRPC4AP	SE	chr20	-	33591675	33591893	33591212	33591419	33592260	33592373	1.77319e-05	-0.1
H2AFY	SE	chr5	-	134686516	134686603	134681657	134681747	134696186	134696288	1.78829e-05	0.296
APOL1	SE	chr22	+	36653128	36653182	36650982	36651045	36653364	36653453	1.82128e-05	0.545
NDUFS2	SE	chr1	+	161179880	161179978	161179646	161179721	161180093	161180179	1.83172e-05	0.204
UBQLN1	SE	chr9	-	86279944	86280060	86278789	86278958	86284099	86284242	1.84205e-05	0.127
MIATNB	SE	chr22	+	27089643	27089799	27068805	27068950	27113215	27113422	1.84502e-05	-0.311
MARK3	SE	chr14	+	103932366	103932428	103931893	103932130	103932679	103932779	1.84545e-05	0.173
IL6R	SE	chr1	+	154408444	154408586	154407465	154407632	154420600	154420647	1.85717e-05	0.18
ATP2B4	SE	chr1	+	203670896	203671025	203669925	203670051	203671171	203671207	1.87103e-05	-0.295
DIAPH2	SE	chrX	+	95990756	95990789	95939661	95940189	95993584	95993761	1.87318e-05	0.211
CHUK	SE	chr10	-	101966986	101967089	101964832	101964956	101969351	101969546	1.87709e-05	0.431
C9orf89	SE	chr9	+	95874160	95874220	95872849	95873003	95874499	95874571	1.87709e-05	0.351
USP38	SE	chr4	+	144118975	144119077	144116868	144116998	144124560	144124719	1.88164e-05	0.555
CHD1	SE	chr5	-	98193883	98194111	98190907	98192429	98194667	98194719	1.88268e-05	-0.11
TMEM18	SE	chr2	-	672807	672862	669756	669850	677288	677439	1.88321e-05	0.2
SEL1L	SE	chr14	-	81950568	81950741	81945955	81946084	81952015	81952090	1.89568e-05	0.296
GZF1	SE	chr20	+	23347639	23347734	23345020	23346384	23349398	23349566	1.89568e-05	0.605
ADPRHL2	SE	chr1	+	36556844	36556941	36554452	36554716	36557218	36557426	1.9089e-05	0.318
ELOVL5	SE	chr6	-	53159063	53159289	53156573	53156761	53160439	53160505	1.91166e-05	-0.127
ITGB1	SE	chr10	-	33200813	33201052	33200375	33200598	33209172	33209313	1.91506e-05	0.169
SORL1	SE	chr11	+	121420668	121420797	121415951	121416138	121421293	121421379	1.92955e-05	0.114
PLEKHM1P	SE	chr17	-	62820943	62820990	62818371	62818511	62833173	62833302	1.94449e-05	0.731
LOC100630923	SE	chr7	+	102047880	102047945	102039994	102040095	102065460	102067129	2.00012e-05	0.296
PIK3CA	SE	chr3	+	178942487	178942609	178941868	178941975	178943749	178943828	2.04195e-05	0.149
AUTS2	SE	chr7	+	70240342	70240372	70236534	70236630	70242088	70242160	2.0592e-05	0.547
SLC44A2	SE	chr19	+	10745649	10745749	10745431	10745563	10746998	10747261	2.076e-05	0.145
GOLGB1	SE	chr3	-	121383772	121383878	121382045	121383461	121386322	121386457	2.11671e-05	0.104
ZMYM6	SE	chr1	-	35478264	35478365	35478031	35478182	35480297	35480489	2.1692e-05	-0.499
ADAM10	SE	chr15	-	58903197	58903306	58902495	58902716	58904006	58904190	2.17062e-05	0.108
DDHD2	SE	chr8	+	38097792	38097882	38095624	38095727	38099805	38099903	2.17685e-05	0.483
CCDC101	SE	chr16	+	28601903	28601987	28601616	28601763	28602093	28602256	2.18867e-05	0.142
CIRH1A	SE	chr16	+	69188295	69188360	69187486	69187583	69189773	69189896	2.22575e-05	0.355
SETD7	SE	chr4	-	140468073	140468203	140453732	140454520	140477251	140477923	2.23745e-05	0.114
IQGAP1	SE	chr15	+	91016071	91016242	91009232	91009323	91016946	91017030	2.26824e-05	0.123
HDAC7	SE	chr12	-	48186320	48186452	48185653	48185787	48187151	48187371	2.28811e-05	-0.154
BECN1	SE	chr17	-	40965965	40966026	40962149	40962946	40966541	40966691	2.29016e-05	0.24
RNF103	SE	chr2	-	86843842	86843914	86839281	86839397	86847452	86847592	2.29441e-05	-0.465
CORO7-PAM16	SE	chr16	-	4411749	4411804	4411361	4411470	4411985	4412161	2.35606e-05	0.16
PFKP	SE	chr10	+	3176674	3176774	3175394	3175506	3177927	3178030	2.36468e-05	0.129
SRRM2	SE	chr16	+	2808988	2809055	2808470	2808548	2809140	2809173	2.37573e-05	0.264
AP3M2	SE	chr8	+	42024681	42024889	42022944	42023078	42025183	42025328	2.40329e-05	-0.209
CLK3	SE	chr15	+	74918142	74918309	74917242	74917359	74919692	74919787	2.42174e-05	-0.107
DDX23	SE	chr12	-	49226204	49226379	49225860	49225969	49227059	49227302	2.48258e-05	0.159
ATRX	SE	chrX	-	76845303	76845410	76829714	76829823	76849165	76849319	2.5786e-05	0.156
MRPL15	SE	chr8	+	55049827	55049993	55049070	55049225	55059941	55061074	2.58186e-05	0.124
BCR	SE	chr22	+	23632525	23632600	23631703	23631808	23634727	23634825	2.58507e-05	0.179
C1orf52	SE	chr1	-	85724617	85724744	85724206	85724405	85725040	85725355	2.70079e-05	-0.204
CTC1	SE	chr17	-	8133208	8133240	8132619	8132764	8133611	8133786	2.72454e-05	0.292
PPP6C	SE	chr9	-	127920519	127920661	127916184	127916264	127933363	127933459	2.72582e-05	0.139
ANKHD1	SE	chr5	+	139892412	139892508	139889603	139889766	139892947	139893064	2.72589e-05	0.14
DDX39A	SE	chr19	-	14521359	14521417	14521027	14521146	14521800	14521984	2.74704e-05	0.125
FUS	SE	chr16	+	31198122	31198157	31196259	31196500	31199645	31199678	2.79339e-05	0.162
WDR75	SE	chr2	+	190322036	190322107	190320045	190320170	190323478	190323598	2.8022e-05	0.351
BCKDK	SE	chr16	+	31122008	31122082	31121721	31121820	31122411	31122540	2.82295e-05	0.224
GLIPR1	SE	chr12	+	75884198	75884298	75875613	75875859	75889356	75889442	2.82295e-05	0.139
GIMAP4	SE	chr7	+	150266975	150267089	150264457	150264525	150269216	150271041	2.82713e-05	0.117
RBM39	SE	chr20	-	34328446	34328519	34319862	34320057	34328745	34328809	2.83989e-05	0.126
CTR9	SE	chr11	+	10787948	10788037	10786094	10786278	10789352	10789538	2.87495e-05	0.171
LRMP	SE	chr12	+	25255417	25255653	25255131	25255175	25256770	25256833	2.87859e-05	-0.234
KLHDC2	SE	chr14	+	50246465	50246524	50246312	50246393	50246930	50247040	2.88717e-05	0.159
VPS29	SE	chr12	-	110934651	110934807	110933816	110934008	110939853	110939945	2.90153e-05	-0.1
ABCF3	SE	chr3	+	183905151	183905231	183904583	183904663	183905451	183905549	2.92913e-05	0.347
DUS3L	SE	chr19	-	5788367	5788409	5788034	5788187	5789217	5789730	2.94856e-05	0.143
GRAMD1A	SE	chr19	+	35504159	35504272	35502377	35502458	35504444	35504602	2.96119e-05	0.142
IP6K1	SE	chr3	-	49785250	49785601	49775644	49775855	49823786	49823973	2.98955e-05	-0.324
PPFIA1	SE	chr11	+	70228193	70228264	70224135	70224301	70229108	70230607	2.99762e-05	0.385
AHCYL1	SE	chr1	+	110563352	110563473	110562169	110562248	110564295	110566364	3.04158e-05	0.283
COLGALT1	SE	chr19	+	17691026	17691049	17690290	17690418	17691507	17691714	3.07263e-05	-0.135
PITRM1	SE	chr10	-	3190362	3190483	3189763	3189929	3191812	3191945	3.09788e-05	0.436
KDM5A	SE	chr12	-	465597	465699	464323	464415	472128	472263	3.09859e-05	0.259
SRSF4	SE	chr1	-	29495014	29495150	29486886	29487029	29508157	29508637	3.13407e-05	-0.1
HCCS	SE	chrX	+	11139026	11139113	11136620	11136740	11139731	11141204	3.1586e-05	0.275
POFUT2	SE	chr21	-	46698212	46698299	46698017	46698084	46702263	46702374	3.16638e-05	0.126
CYB5R1	SE	chr1	-	202935876	202936026	202935014	202935237	202936318	202936404	3.18715e-05	0.104
GSK3B	SE	chr3	-	119595259	119595355	119582265	119582452	119624601	119624699	3.2275e-05	0.161
DHRS13	SE	chr17	-	27226144	27226316	27224798	27225910	27228007	27228319	3.23926e-05	-0.49
TTC17	SE	chr11	+	43467480	43467522	43465605	43465759	43469551	43469672	3.24847e-05	-0.319
SLC35E1	SE	chr19	-	16675847	16675943	16665962	16666208	16677342	16677468	3.26409e-05	-0.237
MVP	SE	chr16	+	29845680	29845758	29845255	29845387	29847024	29847119	3.27505e-05	-0.134
TTC7A	SE	chr2	+	47249000	47249118	47238469	47238574	47256362	47256523	3.3099e-05	0.21
UBA5	SE	chr3	+	132384666	132384912	132379139	132379542	132387661	132387771	3.31744e-05	0.314
DHRS13	SE	chr17	-	27226144	27226310	27224798	27225910	27228007	27228319	3.32913e-05	-0.486
WDR89	SE	chr14	-	64096128	64096339	64091645	64091751	64108521	64108641	3.33622e-05	-0.27
SMIM7	SE	chr19	-	16770205	16770258	16764847	16764936	16770769	16770811	3.34059e-05	0.102
GSK3A	SE	chr19	-	42736647	42736834	42736208	42736301	42737261	42737357	3.35754e-05	-0.104
BBC3	SE	chr19	-	47729820	47730011	47724078	47725175	47734185	47734451	3.39831e-05	0.134
LOC100630923	SE	chr7	+	102047884	102047945	102039994	102040095	102065460	102067129	3.43297e-05	0.317
CTSO	SE	chr4	-	156849487	156849580	156845269	156847222	156850693	156850857	3.4758e-05	0.255
PLEKHM1P	SE	chr17	-	62820742	62820990	62818371	62818511	62833173	62833302	3.52061e-05	0.341
RNH1	SE	chr11	-	504823	505001	502061	502181	507112	507283	3.61796e-05	0.153
CFLAR	SE	chr2	+	202027718	202027829	202025435	202025665	202028557	202037411	3.62034e-05	-0.108
SAMHD1	SE	chr20	-	35563743	35563802	35563431	35563592	35569441	35569514	3.64383e-05	-0.1
CNOT8	SE	chr5	+	154247251	154247352	154238078	154238328	154250220	154250382	3.66846e-05	0.375
EIF4G2	SE	chr11	-	10823207	10823321	10822508	10822634	10823595	10823756	3.69927e-05	0.141
PPP1R16B	SE	chr20	+	37536674	37536836	37536448	37536578	37546799	37551667	3.71237e-05	-0.125
XRN2	SE	chr20	+	21309196	21309308	21307127	21307239	21311118	21311177	3.72248e-05	0.121
UBE2G1	SE	chr17	-	4192524	4192703	4186092	4186216	4210315	4210418	3.72601e-05	0.403
RFC1	SE	chr4	-	39308211	39308321	39306433	39306548	39310255	39310652	3.74735e-05	0.228
FLOT2	SE	chr17	-	27211242	27211333	27210125	27210249	27224543	27224715	3.77053e-05	0.169
NFYA	SE	chr6	+	41046767	41046903	41040706	41040823	41051784	41051931	3.77132e-05	0.123
ZC3H7A	SE	chr16	-	11862886	11862968	11862170	11862357	11864638	11864843	3.7867e-05	0.308
FYN	SE	chr6	-	112020717	112020873	112017479	112017659	112024087	112024237	3.82214e-05	-0.177
NCOA7	SE	chr6	+	126249319	126249393	126248808	126248904	126249781	126253176	3.8999e-05	0.16
SLC9A3R1	SE	chr17	+	72760622	72760785	72759505	72759659	72763074	72763115	3.8999e-05	-0.154
ZNF609	SE	chr15	+	64973507	64973586	64972844	64973061	64973890	64978266	3.91567e-05	0.157
TMEM199	SE	chr17	+	26685938	26686012	26684603	26684904	26686337	26686427	3.918e-05	0.154
RBM12	SE	chr20	-	34246851	34246904	34236846	34243266	34252681	34252878	3.92224e-05	0.135
AMICA1	SE	chr11	-	118076596	118076656	118074290	118074380	118081201	118081427	3.94412e-05	0.286
ILK	SE	chr11	+	6629275	6629441	6625455	6625590	6629623	6629719	3.99384e-05	0.113
RUFY1	SE	chr5	+	179035490	179035617	179034582	179034660	179036376	179037027	4.04433e-05	-0.166
SLC9A3R1	SE	chr17	+	72760608	72760785	72759505	72759659	72763074	72763115	4.05433e-05	-0.154
RFC1	SE	chr4	-	39308211	39308324	39306433	39306548	39310255	39310652	4.07238e-05	0.298
VPS29	SE	chr12	-	110936624	110936704	110933816	110934008	110937339	110937351	4.11107e-05	-0.295
RNF10	SE	chr12	+	121008993	121009094	121004627	121004783	121013433	121013491	4.13639e-05	0.187
PLA2G12A	SE	chr4	-	110639838	110639915	110638703	110638869	110650757	110651242	4.14679e-05	-0.29
SLC9A3R1	SE	chr17	+	72760652	72760785	72759505	72759659	72763074	72763115	4.21018e-05	-0.15
MINA	SE	chr3	-	97670995	97671204	97669629	97669732	97673235	97673339	4.21276e-05	-0.255
GALNT7	SE	chr4	+	174223690	174223886	174223197	174223315	174225146	174225269	4.24834e-05	-0.13
UBE2G1	SE	chr17	-	4192524	4192662	4186092	4186216	4210315	4210418	4.26467e-05	0.424
SLC9A3R1	SE	chr17	+	72760675	72760785	72759505	72759659	72763074	72763115	4.34654e-05	-0.15
ITGB1	SE	chr10	-	33208812	33209012	33200375	33200598	33209172	33209313	4.35357e-05	0.163
CERS5	SE	chr12	-	50538551	50538752	50537734	50537840	50560883	50561316	4.40466e-05	-0.169
PLEKHM1P	SE	chr17	-	62825278	62825483	62818371	62818511	62833173	62833302	4.40957e-05	0.377
PRRC2B	SE	chr9	+	134321787	134322029	134319571	134319715	134322471	134322593	4.41361e-05	-0.126
AFF1	SE	chr4	+	88053422	88053560	88052944	88053016	88055622	88055846	4.41705e-05	0.292
POLD4	SE	chr11	-	67120773	67120903	67120458	67120548	67121009	67121067	4.4279e-05	0.286
CLPTM1L	SE	chr5	-	1330394	1330498	1325865	1325931	1331913	1332049	4.45921e-05	0.102
PPP6C	SE	chr9	-	127923119	127923185	127920519	127920661	127933363	127933459	4.46769e-05	0.1
UBE4A	SE	chr11	+	118234862	118234993	118230295	118230389	118235754	118235916	4.49463e-05	-0.135
TM9SF2	SE	chr13	+	100189992	100190117	100188861	100188991	100192967	100193047	4.54319e-05	0.102
VPS37B	SE	chr12	-	123355436	123355608	123353026	123353109	123380498	123380712	4.54668e-05	0.147
PEPD	SE	chr19	-	33882200	33882385	33878795	33878987	33892626	33892775	4.54668e-05	0.107
C5orf15	SE	chr5	-	133303086	133303150	133295184	133295711	133304136	133304406	4.55616e-05	-0.138
POLR1E	SE	chr9	+	37500836	37500918	37498087	37498221	37501709	37501841	4.72012e-05	0.167
TMEM183A	SE	chr1	+	202976901	202977041	202976533	202976702	202977770	202977938	4.72135e-05	0.175
TMEM50A	SE	chr1	+	25669461	25669564	25666964	25667070	25678116	25678184	4.82086e-05	0.132
CHD2	SE	chr15	+	93534922	93535010	93534705	93534747	93536088	93536228	4.84197e-05	-0.166
TTC7A	SE	chr2	+	47251425	47251498	47238469	47238574	47256362	47256523	4.88065e-05	0.206
MRPS23	SE	chr17	-	55918543	55918621	55918286	55918413	55926600	55926771	4.98311e-05	0.166
PRKX	SE	chrX	-	3529234	3529375	3522383	3526986	3530217	3530366	4.99407e-05	-0.268
MLKL	SE	chr16	-	74716548	74716684	74712796	74712878	74719383	74719481	5.0253e-05	-0.163
PSMA4	SE	chr15	+	78834917	78834987	78834518	78834561	78836531	78836609	5.08327e-05	0.23
ARGLU1	SE	chr13	-	107209906	107209964	107209395	107209479	107211779	107212005	5.08327e-05	-0.121
RELB	SE	chr19	+	45525310	45525468	45515192	45515534	45528586	45528678	5.11592e-05	0.129
SPG20	SE	chr13	-	36902005	36902127	36900711	36900835	36903498	36903654	5.14436e-05	-0.215
ZNRD1	SE	chr6	+	30029693	30029794	30029016	30029446	30030000	30030110	5.16791e-05	0.331
MARCH2	SE	chr19	+	8483625	8483691	8478186	8478304	8486672	8486900	5.1913e-05	-0.149
CECR1	SE	chr22	-	17693394	17693468	17690245	17690613	17700245	17700475	5.26541e-05	-0.112
RNPS1	SE	chr16	-	2314573	2314729	2314176	2314332	2318055	2318413	5.28881e-05	-0.257
DNAJC2	SE	chr7	-	102967778	102967825	102964928	102965009	102968102	102968201	5.3068e-05	0.745
ZNF746	SE	chr7	-	149174654	149174846	149174012	149174138	149189949	149190063	5.3068e-05	0.157
MFSD1	SE	chr3	+	158539772	158539929	158539385	158539442	158541216	158541314	5.33997e-05	0.316
SRRM1	SE	chr1	+	24989673	24989715	24989150	24989295	24993305	24993416	5.34709e-05	0.112
TMEM50A	SE	chr1	+	25669479	25669564	25666964	25667070	25678116	25678184	5.4198e-05	0.146
FBXO42	SE	chr1	-	16578390	16578476	16573334	16578280	16579590	16579647	5.5549e-05	-0.709
SDHAF2	SE	chr11	+	61205475	61205552	61197596	61197654	61213412	61214239	5.57516e-05	-0.23
EIF4G1	SE	chr3	+	184033276	184033333	184032289	184032462	184035504	184035604	5.59832e-05	0.294
B4GALT1	SE	chr9	-	33115988	33116111	33113771	33113876	33135186	33135422	5.62412e-05	0.204
ZNF101	SE	chr19	+	19789534	19789595	19779596	19779775	19789989	19794315	5.67417e-05	0.104
SHC1	SE	chr1	-	154942507	154942675	154941853	154941924	154946723	154946959	5.68406e-05	-0.192
GOLT1B	SE	chr12	+	21660877	21661043	21659818	21659910	21665228	21665310	5.71904e-05	-0.368
FMNL1	SE	chr17	+	43322985	43323100	43322619	43322783	43323244	43323340	5.78148e-05	0.173
IFT57	SE	chr3	-	107882509	107882576	107879658	107881502	107886639	107886711	5.78903e-05	0.167
SAFB2	SE	chr19	-	5611130	5611641	5610649	5610699	5612550	5612578	5.79751e-05	-0.132
SEL1L	SE	chr14	-	81964921	81965025	81964756	81964838	81965802	81965862	5.8346e-05	-0.226
HNRNPM	SE	chr19	+	8527412	8527465	8520288	8520458	8528380	8528388	5.94437e-05	0.103
C1orf174	SE	chr1	-	3808189	3808380	3807132	3807621	3809446	3809560	5.96063e-05	-0.292
ANKRD49	SE	chr11	+	94231067	94231130	94229769	94230117	94231236	94232744	6.013e-05	-0.295
TBC1D14	SE	chr4	+	7002871	7002978	7000811	7000929	7012379	7012508	6.0581e-05	0.125
CCDC47	SE	chr17	-	61830250	61830447	61830100	61830159	61831792	61831878	6.08157e-05	-0.127
LNX2	SE	chr13	-	28136549	28136918	28133978	28134122	28141776	28141976	6.09078e-05	-0.49
MINA	SE	chr3	-	97670995	97671096	97669629	97669732	97673235	97673339	6.11842e-05	-0.295
FNDC3A	SE	chr13	+	49746178	49746232	49742748	49742887	49748570	49748695	6.13462e-05	0.379
HBP1	SE	chr7	+	106829736	106829893	106827013	106827126	106830617	106830762	6.28854e-05	0.286
HCCS	SE	chrX	+	11132954	11133106	11130138	11130280	11135386	11135535	6.34898e-05	0.117
NDUFS2	SE	chr1	+	161173239	161173333	161171936	161172270	161176196	161176387	6.39539e-05	0.164
BBIP1	SE	chr10	-	112667437	112667594	112661295	112661370	112677878	112677971	6.71292e-05	-0.164
POLB	SE	chr8	+	42196529	42196587	42195972	42196203	42202470	42202537	6.78202e-05	0.226
CLK4	SE	chr5	-	178044344	178044435	178043882	178043949	178045556	178045779	6.78516e-05	-0.434
CLK2	SE	chr1	-	155238484	155238586	155238083	155238150	155239278	155239504	6.78784e-05	-0.336
TCF3	SE	chr19	-	1612205	1612429	1611702	1611848	1615283	1615519	6.80118e-05	-0.15
MED13	SE	chr17	-	60045395	60045619	60043822	60044012	60050087	60050249	6.80118e-05	0.184
CCDC90B	SE	chr11	-	82976906	82977021	82970134	82973008	82984689	82984743	6.85859e-05	0.28
PSTPIP1	SE	chr15	+	77324638	77324769	77323481	77323619	77327848	77327904	6.86246e-05	0.157
BSDC1	SE	chr1	-	32843815	32843884	32843570	32843649	32846814	32846869	6.92381e-05	0.102
PUM1	SE	chr1	-	31452908	31453025	31447497	31447649	31454158	31454252	6.96161e-05	0.345
RBM5	SE	chr3	+	50137964	50138038	50137414	50137484	50140515	50140599	6.98344e-05	0.254
KANSL1	SE	chr17	-	44117067	44117269	44116392	44116581	44127898	44128070	6.98794e-05	-0.143
ITGA4	SE	chr2	+	182360509	182360664	182360097	182360143	182363349	182363509	7.07434e-05	0.117
TNPO1	SE	chr5	+	72187636	72187723	72185612	72185784	72188965	72189073	7.10557e-05	0.246
ANTXR2	SE	chr4	-	80905272	80905425	80905031	80905124	80905972	80906017	7.11823e-05	-0.196
REXO2	SE	chr11	+	114315262	114315374	114314577	114314655	114316700	114316809	7.11823e-05	0.263
CNOT2	SE	chr12	+	70726546	70726626	70724066	70724249	70729217	70729343	7.1539e-05	0.131
MTMR14	SE	chr3	+	9731647	9731827	9730627	9730766	9739394	9739550	7.1539e-05	0.17
CARS	SE	chr11	-	3039081	3039184	3038335	3038525	3039637	3039741	7.17358e-05	0.272
FBXW11	SE	chr5	-	171299875	171299994	171297751	171297862	171303288	171303538	7.17534e-05	0.343
GALNT7	SE	chr4	+	174216914	174216994	174216546	174216677	174218945	174219128	7.17598e-05	0.74
KLHDC2	SE	chr14	+	50246465	50246524	50246312	50246393	50247420	50247493	7.18463e-05	0.232
FYCO1	SE	chr3	-	46026643	46026727	46026347	46026514	46037213	46037316	7.19824e-05	0.176
NDUFS2	SE	chr1	+	161173192	161173333	161171936	161172270	161176196	161176387	7.20915e-05	0.164
DENND4B	SE	chr1	-	153903167	153903333	153903014	153903079	153904679	153904916	7.25224e-05	0.136
CCNT2	SE	chr2	+	135703458	135703552	135700181	135700244	135703670	135703716	7.34011e-05	-0.508
HNRNPH1	SE	chr5	-	179047892	179048028	179045145	179045324	179048242	179048398	7.3886e-05	0.114
HDAC5	SE	chr17	-	42157474	42157593	42156511	42156645	42157768	42157866	7.39035e-05	0.133
INPP5K	SE	chr17	-	1411408	1411520	1401229	1401416	1412471	1412647	7.39203e-05	0.105
CALU	SE	chr7	+	128388626	128388858	128379345	128379486	128398924	128399091	7.43957e-05	0.366
FAM120A	SE	chr9	+	96277948	96278049	96261076	96261168	96289436	96289524	7.50986e-05	0.181
GLE1	SE	chr9	+	131269494	131269619	131266970	131267183	131271154	131271376	7.53601e-05	0.126
PIN1	SE	chr19	+	9948687	9948751	9947333	9947551	9949111	9949324	7.70843e-05	0.234
SLC25A45	SE	chr11	-	65146846	65147032	65144288	65144547	65147337	65147409	7.75763e-05	-0.139
LINC00861	SE	chr8	-	126963157	126963216	126953375	126958426	126963429	126963441	7.79221e-05	0.111
NDUFS2	SE	chr1	+	161173228	161173333	161171936	161172270	161176196	161176387	7.79309e-05	0.166
DECR1	SE	chr8	+	91017519	91017597	91013579	91013789	91031136	91031194	7.82684e-05	-0.137
EPC2	SE	chr2	+	149525590	149525655	149522523	149522715	149526719	149526809	7.88296e-05	-0.101
CRNKL1	SE	chr20	-	20021329	20021410	20020252	20020492	20022209	20022269	7.93899e-05	0.132
ATP5S	SE	chr14	+	50781308	50781344	50779046	50779107	50788200	50788312	8.02881e-05	0.286
CIRBP	SE	chr19	+	1272425	1272478	1271979	1272050	1274305	1274808	8.07215e-05	0.135
CNOT8	SE	chr5	+	154244751	154244945	154238078	154238328	154250220	154250382	8.07832e-05	0.206
CELF2	SE	chr10	+	11363169	11363349	11356137	11356221	11367798	11367942	8.10867e-05	0.127
YTHDF3	SE	chr8	+	64087889	64087975	64081945	64081970	64098705	64100303	8.11419e-05	0.291
AKNA	SE	chr9	-	117121988	117122074	117120200	117120447	117122175	117122342	8.1344e-05	-0.244
FAM3C	SE	chr7	-	121000382	121000433	121000096	121000181	121002950	121003001	8.17696e-05	-0.126
ANKIB1	SE	chr7	+	92021554	92021606	92020483	92020658	92025678	92025790	8.18343e-05	0.409
TMEM9B	SE	chr11	-	8974749	8974884	8968747	8970022	8977736	8977845	8.27794e-05	0.149
DOCK8	SE	chr9	+	443454	443516	441874	442009	446369	446606	8.31776e-05	0.104
XRN2	SE	chr20	+	21309100	21309308	21307127	21307239	21311118	21311177	8.34827e-05	0.181
IL6R	SE	chr1	+	154422386	154422456	154420600	154420647	154426963	154427057	8.38115e-05	0.116
PPM1D	SE	chr17	+	58711213	58711338	58700881	58701110	58725252	58725443	8.3957e-05	0.583
UBOX5	SE	chr20	-	3103766	3103836	3102029	3103230	3103957	3104052	8.44887e-05	-0.155
NSMCE4A	SE	chr10	-	123719665	123719733	123719015	123719110	123719872	123719921	8.50127e-05	-0.149
PSTPIP1	SE	chr15	+	77324638	77324735	77323481	77323619	77327848	77327904	8.50303e-05	0.146
SPPL2A	SE	chr15	-	51024799	51024881	51023161	51023236	51028297	51028399	8.56379e-05	0.117
YWHAE	SE	chr17	-	1257504	1257641	1247833	1248793	1268152	1268352	8.63283e-05	0.114
PKD1	SE	chr16	-	2152102	2152257	2150396	2150567	2152381	2152567	8.63283e-05	-0.194
PDIA6	SE	chr2	-	10925059	10925156	10923516	10924452	10927406	10927565	8.64163e-05	0.225
NIPAL2	SE	chr8	-	99240432	99240554	99234706	99234828	99248382	99248442	8.66945e-05	-0.134
NDUFS2	SE	chr1	+	161173205	161173333	161171936	161172270	161176196	161176387	8.66968e-05	0.162
FUS	SE	chr16	+	31198078	31198157	31196259	31196500	31199645	31199678	8.68119e-05	0.199
GLE1	SE	chr9	+	131284946	131285095	131277807	131277918	131285558	131285619	8.78174e-05	0.209
SSH2	SE	chr17	-	28022476	28022541	28004690	28004759	28029976	28030080	8.81237e-05	0.155
SSFA2	SE	chr2	+	182783049	182783197	182781616	182781732	182783324	182783402	8.9085e-05	-0.453
MYLIP	SE	chr6	+	16130787	16130851	16129316	16129640	16141855	16142041	8.9085e-05	-0.196
NNT	SE	chr5	+	43624133	43624222	43615949	43616167	43628301	43628489	8.95013e-05	0.21
RAB11FIP3	SE	chr16	+	546823	546859	538850	539000	553003	553097	9.40532e-05	0.232
DOK2	SE	chr8	-	21769411	21769499	21768183	21768368	21769739	21770021	9.4552e-05	0.136
UBOX5	SE	chr20	-	3103674	3103836	3102029	3103230	3103957	3104052	9.46701e-05	-0.199
ATP13A2	SE	chr1	-	17325138	17325292	17323514	17323670	17326505	17326637	9.77772e-05	-0.129
PIGQ	SE	chr16	+	632247	632309	630857	630972	632882	634136	9.93299e-05	-0.294
CD4	SE	chr12	+	6909472	6909637	6898637	6898828	6923307	6923466	9.98609e-05	0.14
ATG2A	SE	chr11	-	64671061	64671148	64670759	64670836	64673034	64673127	9.98874e-05	0.293
MIATNB	SE	chr22	+	27089647	27089799	27068805	27068950	27113215	27113422	0.000100367	-0.192
VPS36	SE	chr13	-	53003370	53003567	53001321	53001354	53007796	53007883	0.000102711	-0.2
DCAF8	SE	chr1	-	160194851	160194909	160194231	160194339	160195380	160195453	0.000105612	0.107
ARID3B	SE	chr15	+	74865472	74865545	74865202	74865274	74882160	74882344	0.000105778	0.163
RASGRP1	SE	chr15	-	38790994	38791147	38786582	38786968	38792303	38792340	0.000105778	0.102
TRAPPC4	SE	chr11	+	118892469	118892596	118889852	118890027	118894030	118894385	0.000107371	0.294
TAF5L	SE	chr1	-	229745852	229745957	229737941	229738666	229750087	229750232	0.000108241	0.184
COPS8	SE	chr2	+	237996106	237996206	237995769	237995840	237997247	237997296	0.000109097	-0.164
YTHDF2	SE	chr1	+	29068914	29070498	29064770	29064850	29095440	29096287	0.000110127	-0.146
SZRD1	SE	chr1	+	16717869	16717919	16693524	16693803	16721532	16724643	0.000112021	0.119
CCM2	SE	chr7	+	45108041	45108178	45067232	45067396	45112324	45112382	0.000113367	0.261
TCP1	SE	chr6	-	160201966	160202142	160201474	160201598	160204972	160205099	0.000115141	0.122
FAM53C	SE	chr5	+	137677497	137677555	137676872	137677102	137680513	137681298	0.000115412	0.128
MRPL22	SE	chr5	+	154330362	154330498	154320776	154320825	154335930	154335996	0.000116584	0.168
MARCH2	SE	chr19	+	8483420	8483691	8478186	8478304	8486672	8486900	0.000116656	-0.163
GPCPD1	SE	chr20	-	5590518	5590601	5585009	5585086	5591487	5591672	0.000116666	-0.141
MED15	SE	chr22	+	20929399	20929519	20922807	20922918	20937126	20937254	0.00011732	0.175
WDR55	SE	chr5	+	140046628	140046698	140044383	140044688	140047818	140047919	0.000117544	0.102
DAPP1	SE	chr4	+	100786882	100786993	100784926	100785012	100787190	100787278	0.000117646	-0.4
TAPBPL	SE	chr12	+	6570324	6570556	6570020	6570104	6571199	6571488	0.000121721	-0.1
WASH3P	SE	chr15	+	102516126	102516144	102515215	102515368	102516335	102516808	0.000122705	0.184
PHIP	SE	chr6	-	79679765	79679890	79679551	79679634	79680497	79680605	0.000123234	-0.24
MGA	SE	chr15	+	42053936	42054048	42052520	42052727	42054326	42054560	0.000124188	0.277
SLC15A3	SE	chr11	-	60715246	60715390	60714003	60714293	60718465	60719257	0.000124362	-0.125
MX2	SE	chr21	+	42775461	42775563	42775193	42775270	42778670	42778925	0.000124596	-0.272
IL6ST	SE	chr5	-	55247291	55247432	55243320	55243417	55247756	55247903	0.000125521	0.214
PHIP	SE	chr6	-	79680497	79680605	79679551	79679634	79688308	79688428	0.000125878	0.186
SEL1L3	SE	chr4	-	25780697	25780825	25769361	25769452	25783863	25784040	0.000128785	0.138
CCDC174	SE	chr3	+	14708930	14709025	14708311	14708454	14709555	14709688	0.000128799	0.533
SP100	SE	chr2	+	231328781	231328865	231327149	231327233	231331015	231331069	0.000133406	0.174
SEC24B	SE	chr4	+	110421059	110421210	110415770	110416012	110427486	110427668	0.000134464	-0.248
MFNG	SE	chr22	-	37868480	37868566	37865100	37866067	37870549	37870715	0.000134626	0.107
PCYOX1L	SE	chr5	+	148740549	148740595	148737569	148737719	148742199	148742406	0.000134755	-0.22
MBNL1	SE	chr3	+	152017193	152018156	151985828	151986881	152132729	152132900	0.00013765	-0.121
NIPBL	SE	chr5	+	37057287	37057434	37052467	37052668	37060945	37061120	0.00013765	0.267
STX5	SE	chr11	-	62598490	62598649	62595032	62595103	62599425	62599563	0.000137897	-0.119
DENND5A	SE	chr11	-	9198318	9198449	9192173	9192324	9199678	9199913	0.000138615	-0.211
VWA9	SE	chr15	-	65899496	65899780	65897466	65897574	65903435	65903627	0.00013993	-0.371
CPSF7	SE	chr11	-	61187941	61188002	61187420	61187566	61188861	61189080	0.00013993	0.19
EWSR1	SE	chr22	+	29695184	29695270	29694722	29694885	29695588	29695841	0.000142095	0.442
C9orf142	SE	chr9	+	139887380	139887426	139887091	139887156	139887504	139887695	0.000142837	0.378
SDHAP1	SE	chr3	-	195712497	195712660	195710982	195711147	195717060	195717150	0.000143398	0.568
DYNC1LI2	SE	chr16	-	66758564	66758651	66754798	66757725	66759730	66759847	0.000144654	0.101
RMDN1	SE	chr8	-	87507057	87507195	87500780	87500868	87519223	87519341	0.000144654	-0.128
U2AF1L4	SE	chr19	-	36235391	36235441	36234970	36235322	36235526	36235639	0.000146872	-0.12
RNH1	SE	chr11	-	504823	505001	502061	502181	506608	506821	0.0001481	0.216
SURF6	SE	chr9	-	136200553	136200642	136199383	136199596	136201227	136201437	0.000148528	0.226
PPP2R5A	SE	chr1	+	212516859	212516967	212515529	212515622	212519144	212519275	0.000149834	-0.103
TAMM41	SE	chr3	-	11886364	11886570	11885502	11885685	11887975	11888393	0.000150335	-0.173
DERL1	SE	chr8	-	124042844	124042956	124037225	124037290	124054209	124054663	0.000153689	0.193
ARPC4-TTLL3	SE	chr3	+	9857757	9857886	9854931	9855029	9862229	9862425	0.000153832	0.125
INPP5A	SE	chr10	+	134595159	134595267	134594352	134594421	134595364	134595401	0.000154492	-0.269
EED	SE	chr11	+	85968556	85968638	85967428	85967554	85975213	85975305	0.00015494	0.124
PXK	SE	chr3	+	58376308	58376386	58368240	58368427	58380724	58380829	0.000155847	0.286
TACC1	SE	chr8	+	38698831	38699007	38697741	38697785	38699804	38699965	0.000159437	-0.186
CCM2	SE	chr7	+	45108041	45108178	45067232	45067396	45109424	45109560	0.000160594	0.16
PSMA4	SE	chr15	+	78834824	78834987	78834518	78834561	78836531	78836609	0.000160594	0.139
GLOD4	SE	chr17	-	673660	673747	673283	673397	674564	674701	0.000161435	0.137
PICALM	SE	chr11	-	85689112	85689136	85687665	85687725	85692171	85692271	0.000162002	0.15
CLDND1	SE	chr3	-	98239976	98240281	98237728	98237839	98241692	98241910	0.000162095	-0.146
HYOU1	SE	chr11	-	118926461	118926555	118926204	118926283	118926781	118926879	0.000165236	0.143
CASP3	SE	chr4	-	185556447	185556568	185553421	185553550	185559554	185559622	0.000165707	0.311
WBP1	SE	chr2	+	74686604	74686689	74685526	74685798	74686769	74686872	0.00016842	-0.103
SSH2	SE	chr17	-	28011580	28011702	28004690	28004759	28029976	28030080	0.000169804	0.24
TMBIM1	SE	chr2	-	219142657	219142841	219142355	219142393	219143237	219143288	0.000170037	0.101
ATG2A	SE	chr11	-	64671061	64671132	64670759	64670836	64673034	64673110	0.000170575	0.204
SPTAN1	SE	chr9	+	131390203	131390221	131389664	131389777	131392599	131392654	0.000170575	-0.128
CELF2	SE	chr10	+	11363151	11363349	11356101	11356221	11367798	11367942	0.000174356	0.213
CHUK	SE	chr10	-	101952215	101952450	101950625	101950725	101953054	101953188	0.000174677	-0.119
C1orf174	SE	chr1	-	3808189	3808343	3807132	3807621	3809446	3809560	0.000174901	-0.314
HDAC10	SE	chr22	-	50687531	50687597	50687259	50687319	50687756	50687883	0.000177648	0.12
INPP5B	SE	chr1	-	38332337	38332502	38332130	38332215	38334172	38334286	0.000177876	-0.24
PRDM4	SE	chr12	-	108134722	108135037	108133159	108133328	108135997	108136125	0.000181596	-0.211
TTC37	SE	chr5	-	94848457	94848522	94848180	94848322	94849274	94849349	0.000181891	-0.231
NSUN2	SE	chr5	-	6605385	6605521	6604579	6604798	6606932	6607025	0.000182332	0.246
PAPD4	SE	chr5	+	78938654	78938733	78936927	78937019	78940945	78941015	0.000182332	0.334
KCTD20	SE	chr6	+	36446897	36447000	36442565	36442839	36447367	36447488	0.000182332	0.157
DHX30	SE	chr3	+	47888921	47889026	47888762	47888838	47889270	47889446	0.000183709	0.106
TRAPPC4	SE	chr11	+	118890859	118891039	118889852	118890027	118892469	118892596	0.000183791	0.305
PRKRIP1	SE	chr7	+	102038066	102038145	102036803	102036984	102039994	102040095	0.000183816	0.119
RNH1	SE	chr11	-	504823	504996	502061	502249	507112	507283	0.000183858	0.165
STRN3	SE	chr14	-	31382729	31382863	31381212	31381388	31388171	31388312	0.000184874	0.61
CPPED1	SE	chr16	-	12798480	12798906	12753655	12758972	12875041	12875260	0.000185589	0.227
RHOC	SE	chr1	-	113247721	113247745	113246265	113246428	113249699	113250025	0.000190255	-0.403
RBM4	SE	chr11	+	66410920	66410999	66407170	66407594	66413497	66413588	0.000191002	-0.288
TRA2A	SE	chr7	-	23561750	23562051	23561325	23561459	23571407	23571660	0.000193858	-0.217
UFL1	SE	chr6	+	96988410	96988531	96986506	96986686	96990769	96990892	0.000195009	0.256
PIN1	SE	chr19	+	9948687	9948774	9947333	9947551	9949111	9949324	0.000195878	0.29
TSTD1	SE	chr1	-	161008340	161008463	161007702	161007865	161008669	161008774	0.000197299	0.146
UNKL	SE	chr16	-	1435208	1435386	1421519	1421612	1440632	1440695	0.000197456	-0.161
RNMT	SE	chr18	+	13746218	13746336	13742486	13742651	13752324	13752426	0.000197456	0.155
RFTN1	SE	chr3	-	16364882	16364979	16357351	16358739	16368279	16368383	0.000197456	0.136
WDR36	SE	chr5	+	110459805	110459887	110459502	110459622	110461305	110461493	0.000198113	0.242
HERC2	SE	chr15	-	28375308	28375448	28370151	28370339	28375648	28375740	0.000198373	0.135
PICALM	SE	chr11	-	85701296	85701442	85694908	85695016	85707868	85707972	0.000200111	-0.433
HDAC5	SE	chr17	-	42162389	42162523	42161922	42162043	42163939	42164105	0.000200604	0.13
LEMD3	SE	chr12	+	65634416	65634589	65633915	65634018	65634688	65634867	0.000204427	-0.108
PPP3CC	SE	chr8	+	22397244	22397449	22390433	22390531	22398127	22398657	0.000207566	-0.283
NUP153	SE	chr6	-	17661883	17662010	17649393	17649531	17662248	17662301	0.000207568	0.163
AZIN1	SE	chr8	-	103862226	103862372	103855778	103855975	103870240	103870378	0.000208531	-0.158
ZBTB43	SE	chr9	+	129571071	129571194	129567284	129567411	129594765	129600487	0.000209981	0.139
RBM4	SE	chr11	+	66410920	66411611	66407170	66407594	66413497	66413588	0.000210139	-0.222
PEF1	SE	chr1	-	32100822	32101123	32098095	32098239	32110441	32110838	0.0002157	0.336
CEP350	SE	chr1	+	180023549	180023637	180022884	180023069	180031354	180031501	0.000217808	0.213
DCAF4	SE	chr14	+	73408977	73409210	73408452	73408532	73409701	73409804	0.000218402	-0.101
INSIG1	SE	chr7	+	155094456	155094556	155089968	155090407	155099950	155101945	0.000218977	0.348
ARHGAP25	SE	chr2	+	69014971	69015088	69009364	69009452	69034404	69034612	0.000219133	0.256
APH1B	SE	chr15	+	63594543	63594671	63571359	63571530	63597812	63601325	0.000219525	0.419
ZMPSTE24	SE	chr1	+	40745791	40745984	40737565	40737707	40747014	40747199	0.000220899	-0.273
N4BP1	SE	chr16	-	48585296	48585388	48581917	48582025	48587449	48587580	0.000223208	0.163
PHF10	SE	chr6	-	170114884	170114938	170112481	170112635	170115803	170115953	0.000223208	0.238
CNPY3	SE	chr6	+	42903149	42903211	42902115	42902336	42903311	42903408	0.000223737	-0.117
RELB	SE	chr19	+	45525396	45525468	45515192	45515534	45528586	45528678	0.000224874	0.2
POLR2B	SE	chr4	+	57888317	57888412	57887064	57887161	57889495	57889746	0.000225837	0.101
IRF7	SE	chr11	-	613950	614037	613784	613865	614173	614399	0.000226927	0.133
CASP4	SE	chr11	-	104822622	104822732	104820269	104820504	104825473	104825728	0.000227694	-0.12
NSUN2	SE	chr5	-	6602486	6602613	6599351	6600345	6604250	6604389	0.000227991	0.26
ST3GAL1	SE	chr8	-	134511377	134511432	134488520	134488843	134558016	134558169	0.000227991	0.118
PPIL2	SE	chr22	+	22048104	22048161	22043020	22043138	22048881	22048954	0.000229122	0.111
DIAPH1	SE	chr5	-	140909169	140909264	140908738	140908840	140913901	140914000	0.000231279	0.132
HSPH1	SE	chr13	-	31722510	31722617	31719699	31719905	31724090	31724319	0.000232566	0.215
GBF1	SE	chr10	+	104128495	104128589	104127974	104128211	104128967	104129144	0.000236741	0.159
RPA2	SE	chr1	-	28224143	28224218	28223515	28223632	28233438	28233552	0.000238482	0.26
AAMP	SE	chr2	-	219130786	219130870	219130553	219130669	219131165	219131310	0.000239581	0.109
IFI44	SE	chr1	+	79126238	79126376	79124996	79125168	79128388	79128602	0.000240785	0.227
FBXO38	SE	chr5	+	147806775	147807285	147805141	147805264	147812986	147813087	0.000242504	-0.252
ECHDC2	SE	chr1	-	53370705	53370762	53370317	53370505	53373539	53373626	0.000242905	0.104
CD53	SE	chr1	+	111440430	111440514	111436948	111437023	111441745	111442558	0.000243004	0.146
ZDHHC20	SE	chr13	-	21974511	21974632	21965860	21965993	21975791	21975824	0.000243004	0.128
TRERF1	SE	chr6	-	42233488	42233535	42232441	42232592	42235891	42237586	0.000245194	0.112
PCNX	SE	chr14	+	71560460	71560562	71555908	71556059	71568706	71568937	0.000245462	-0.115
MACF1	SE	chr1	+	39844132	39844195	39838150	39838268	39844874	39845116	0.000249473	-0.158
NUP153	SE	chr6	-	17661883	17661986	17649393	17649531	17662248	17662301	0.000249829	0.233
RDH13	SE	chr19	-	55559413	55559625	55558472	55558856	55559696	55559909	0.000251623	-0.289
PSMC6	SE	chr14	+	53176292	53176399	53175481	53175534	53177818	53177886	0.000253253	-0.18
TBC1D1	SE	chr4	+	38045982	38046111	38037208	38037319	38051238	38051519	0.00025541	0.128
EWSR1	SE	chr22	+	29684594	29684744	29682911	29683123	29688125	29688158	0.000255581	0.277
ZFAND5	SE	chr9	-	74975543	74975700	74975025	74975137	74979611	74980163	0.000258274	0.23
EXOC1	SE	chr4	+	56757480	56757588	56756388	56756552	56758800	56758877	0.000260177	0.21
IL6R	SE	chr1	+	154408444	154408640	154407465	154407632	154420600	154420647	0.000260236	0.263
HNRNPUL2	SE	chr11	-	62483335	62483466	62482971	62483079	62484460	62484661	0.000262888	0.103
SOAT1	SE	chr1	+	179314081	179314211	179312724	179312770	179316734	179316832	0.000262898	0.412
NOL11	SE	chr17	+	65732781	65732870	65732015	65732139	65733186	65733261	0.000263262	0.291
STX5	SE	chr11	-	62598490	62598582	62595032	62595103	62599425	62599563	0.000264521	-0.112
NFATC1	SE	chr18	+	77221310	77221366	77193578	77193738	77227449	77227582	0.000265457	0.25
INF2	SE	chr14	+	105181617	105181677	105180539	105181193	105185131	105185947	0.000265815	0.203
VWA9	SE	chr15	-	65876832	65876909	65874291	65874357	65877107	65877226	0.000270306	0.123
NAP1L4	SE	chr11	-	2970456	2970494	2965659	2966876	2972488	2972545	0.000276204	-0.139
TBL1X	SE	chrX	+	9683420	9683552	9682941	9683043	9684259	9687780	0.000276711	-0.12
DCAF16	SE	chr4	-	17811159	17811315	17806729	17806848	17812069	17812381	0.000278714	-0.353
MRPS9	SE	chr2	+	105708662	105708784	105706377	105706453	105708858	105709027	0.000278714	-0.134
YPEL5	SE	chr2	+	30378715	30378776	30369749	30369928	30379493	30379658	0.000280939	-0.164
INF2	SE	chr14	+	105181620	105181677	105180539	105181193	105185131	105185947	0.000282158	0.175
TM7SF3	SE	chr12	-	27129192	27129290	27128428	27128591	27132716	27132869	0.000282304	0.295
IWS1	SE	chr2	-	128253836	128253937	128253573	128253724	128260390	128260448	0.000282507	-0.241
YIF1B	SE	chr19	-	38806064	38806246	38800044	38800283	38806356	38806445	0.000285114	-0.205
CRELD1	SE	chr3	+	9985585	9985779	9985064	9985199	9986048	9987097	0.000285362	-0.144
TAF11	SE	chr6	-	34847743	34847840	34845554	34846497	34850708	34850857	0.00028687	0.597
NR1H2	SE	chr19	+	50881405	50881696	50880989	50881127	50881778	50882053	0.000287242	-0.138
JKAMP	SE	chr14	+	59967908	59967985	59965444	59965626	59970571	59972124	0.000287404	0.225
MBIP	SE	chr14	-	36781164	36781230	36780778	36780931	36783717	36783814	0.000287404	0.205
MORF4L2	SE	chrX	-	102939608	102939657	102930425	102931979	102940098	102940188	0.000287448	0.499
ARPC4-TTLL3	SE	chr3	+	9860543	9860604	9854931	9855029	9862229	9862425	0.000290156	0.168
KLHDC2	SE	chr14	+	50246930	50247040	50246312	50246393	50247420	50247493	0.000295697	0.169
TSTD1	SE	chr1	-	161008288	161008424	161007702	161007865	161008669	161008774	0.00029673	0.155
ZMYND11	SE	chr10	+	287960	288079	286832	286910	292705	292913	0.000297475	0.21
TNFSF12-TNFSF13	SE	chr17	+	7463167	7463210	7454259	7454295	7463365	7463484	0.00029823	0.497
DNTTIP1	SE	chr20	+	44430637	44430694	44430040	44430097	44431971	44432027	0.000298237	0.661
PHF10	SE	chr6	-	170114828	170114929	170112481	170112635	170115803	170115953	0.000298424	0.203
ARL1	SE	chr12	-	101794839	101794951	101790176	101790355	101796642	101796724	0.000298424	0.11
NVL	SE	chr1	-	224454705	224454925	224437913	224438020	224455735	224455835	0.000299092	-0.224
RANBP10	SE	chr16	-	67769538	67769661	67768760	67768945	67771915	67771938	0.000299861	-0.224
USP30	SE	chr12	+	109509416	109509515	109505328	109505432	109510109	109510155	0.00030145	0.269
UHMK1	SE	chr1	+	162470439	162470564	162469744	162470037	162470702	162470894	0.000305301	-0.163
TET3	SE	chr2	+	74320424	74320545	74320028	74320118	74320655	74320793	0.00030933	-0.217
SBDSP1	SE	chr7	+	72301330	72301393	72299951	72300362	72302181	72302378	0.000309561	-0.101
COX18	SE	chr4	-	73933745	73933846	73930966	73931130	73935033	73935476	0.000311123	0.459
LINC00861	SE	chr8	-	126960978	126961100	126953375	126958426	126963429	126963441	0.000313666	0.677
FAM120A	SE	chr9	+	96277951	96278049	96261071	96261168	96289436	96289524	0.000314579	0.486
TSPAN32	SE	chr11	+	2329887	2330040	2325336	2325434	2334883	2334938	0.000315483	0.119
RABGGTB	SE	chr1	+	76257865	76257991	76257145	76257256	76259768	76259918	0.000319125	0.159
MYLIP	SE	chr6	+	16130787	16130978	16129316	16129640	16141855	16142041	0.000320032	-0.123
NOTCH2	SE	chr1	-	120491036	120491189	120484148	120484377	120493346	120493460	0.000320633	0.346
MORF4L2	SE	chrX	-	102939608	102939657	102933426	102933579	102940098	102940188	0.000321522	0.436
NAP1L4	SE	chr11	-	2975530	2975640	2973009	2973039	2975756	2975876	0.000321761	-0.246
FCGRT	SE	chr19	+	50016500	50016730	50015535	50016007	50017138	50017390	0.00032205	-0.148
RAP1GAP2	SE	chr17	+	2935704	2935743	2934215	2934292	2936685	2941035	0.00032264	0.121
TNRC6B	SE	chr22	+	40706820	40706997	40704515	40704653	40708508	40708655	0.00032404	0.246
RNF138	SE	chr18	+	29691716	29691882	29672662	29672849	29703480	29703537	0.000325248	-0.148
ZNF609	SE	chr15	+	64962544	64962632	64915025	64915251	64966114	64968455	0.000325668	0.118
CLPTM1L	SE	chr5	-	1330394	1330518	1325865	1325931	1331913	1331998	0.000325668	0.164
GRK5	SE	chr10	+	121196162	121196353	121190898	121191039	121199242	121199280	0.000326147	0.108
CCM2	SE	chr7	+	45103516	45103600	45067232	45067396	45109424	45109560	0.000329795	0.187
OTUD4	SE	chr4	-	146065462	146065586	146065097	146065153	146067418	146067581	0.000330456	0.15
MX1	SE	chr21	+	42821145	42821222	42817926	42818068	42823093	42823170	0.000330928	0.335
AARSD1	SE	chr17	-	41106892	41106984	41103816	41103911	41107174	41107384	0.000335138	0.193
SEC24B	SE	chr4	+	110421002	110421210	110415770	110416012	110427486	110427668	0.000342169	-0.286
PPARD	SE	chr6	+	35387903	35388058	35378763	35378994	35391722	35391925	0.0003423	0.143
GRINA	SE	chr8	+	145066045	145066117	145065859	145065972	145066412	145066541	0.000344807	-0.194
PRKAG1	SE	chr12	-	49397539	49397705	49397340	49397378	49398289	49398416	0.000344998	0.309
IQGAP2	SE	chr5	+	75979600	75979742	75978939	75979042	75989179	75989267	0.000352775	0.186
REPS1	SE	chr6	-	139228631	139228737	139225151	139226269	139229804	139229953	0.000354392	-0.135
ARPP19	SE	chr15	-	52856386	52856443	52849296	52849419	52861312	52861418	0.000355571	0.411
SFI1	SE	chr22	+	31893233	31893334	31892124	31892623	31904244	31904362	0.000356406	-0.1
ATXN7	SE	chr3	+	63983296	63983363	63981180	63982159	63985125	63989136	0.000358877	-0.194
SORL1	SE	chr11	+	121420668	121420708	121415951	121416138	121421293	121421379	0.000362652	0.227
GAS6-AS1	SE	chr13	+	114537620	114537737	114536464	114536552	114541049	114541220	0.000367049	0.343
POGZ	SE	chr1	-	151402078	151402187	151400598	151400889	151403141	151403317	0.000367249	0.189
HCCS	SE	chrX	+	11139026	11139152	11136620	11136740	11139731	11141204	0.000368814	0.408
ZBTB44	SE	chr11	-	130106004	130106111	130096573	130104168	130106687	130106988	0.00037235	-0.261
DDX27	SE	chr20	+	47847559	47847652	47846696	47846886	47849842	47849942	0.000373152	-0.21
SLAMF1	SE	chr1	-	160593292	160593375	160589565	160589639	160593885	160593975	0.000382677	-0.211
RPS24	SE	chr10	+	79799961	79799983	79796951	79797062	79800372	79800473	0.00038794	-0.124
SRP9	SE	chr1	+	225974565	225974687	225971001	225971070	225976941	225978168	0.000391339	-0.131
CNPY3	SE	chr6	+	42902115	42902336	42896859	42897459	42903311	42903408	0.000397414	0.121
BSDC1	SE	chr1	-	32844324	32844440	32843570	32843649	32846814	32846869	0.000400049	0.101
ELP2	SE	chr18	+	33722243	33722310	33721099	33721164	33722788	33722929	0.000400213	0.145
SCYL3	SE	chr1	-	169824936	169825098	169823410	169824105	169828181	169828353	0.00040691	-0.496
STAT2	SE	chr12	-	56742535	56742588	56742312	56742407	56743128	56743283	0.00040946	0.167
FLT3LG	SE	chr19	+	49983554	49983733	49979679	49979823	49989271	49989488	0.000412355	0.144
MEF2B	SE	chr19	-	19257081	19257149	19256375	19256831	19257363	19257457	0.000412534	0.329
HDAC10	SE	chr22	-	50687126	50687288	50686794	50686901	50687756	50687883	0.000415969	0.638
SORL1	SE	chr11	+	121420721	121420797	121415951	121416138	121421293	121421379	0.000416595	0.238
ARID4A	SE	chr14	+	58830756	58830782	58827618	58827760	58830887	58832018	0.00041929	-0.157
HLA-B	SE	chr6	-	31322411	31322471	31322255	31322303	31322883	31323037	0.000421778	0.598
TSPAN14	SE	chr10	+	82248972	82249070	82214037	82214127	82264483	82264534	0.000422089	0.148
DENND4C	SE	chr9	+	19371753	19371818	19369834	19369985	19372034	19374266	0.000423638	0.365
PANK2	SE	chr20	+	3899317	3899443	3897573	3897697	3903890	3904502	0.000423638	0.184
AUP1	SE	chr2	-	74755877	74756048	74755543	74755616	74756258	74756401	0.000424232	-0.136
RCOR3	SE	chr1	+	211469017	211469095	211462519	211462738	211477424	211477482	0.000424467	0.131
MRPL55	SE	chr1	-	228296137	228296350	228295935	228296019	228296961	228297013	0.000425485	-0.301
DNAJC2	SE	chr7	-	102967778	102967825	102966989	102967131	102968102	102968201	0.000425983	0.229
FBXO42	SE	chr1	-	16578390	16578476	16573334	16578280	16578782	16578899	0.000435854	-0.212
RNPEP	SE	chr1	+	201970503	201970548	201969029	201969143	201970786	201970895	0.000441666	0.102
ITGB7	SE	chr12	-	53589409	53589484	53589157	53589247	53589824	53589983	0.000443104	0.125
GRINA	SE	chr8	+	145066197	145066246	145065755	145065972	145066412	145066541	0.000443104	-0.177
JMJD1C	SE	chr10	-	64961888	64962010	64960235	64960437	64966354	64968561	0.000443268	-0.129
UBA3	SE	chr3	-	69106406	69106460	69105929	69105966	69110964	69111075	0.000444844	0.108
NOC4L	SE	chr12	+	132635525	132635586	132630103	132630210	132635802	132635913	0.000445555	0.229
CDAN1	SE	chr15	-	43017341	43017573	43015759	43016814	43017686	43017868	0.000449731	0.231
POLR3E	SE	chr16	+	22337991	22338022	22337081	22337599	22339830	22339908	0.000449731	-0.133
SLC43A3	SE	chr11	-	57184045	57184143	57182405	57182579	57185220	57185360	0.000451343	0.154
PDCD6IP	SE	chr3	+	33867971	33868072	33866678	33866832	33870329	33870461	0.000451979	0.162
RANBP10	SE	chr16	-	67769538	67769657	67768760	67768945	67771915	67771938	0.000451981	-0.246
FAM21C	SE	chr10	+	46280956	46281079	46280268	46280349	46282482	46282695	0.000452544	0.267
VPS29	SE	chr12	-	110936624	110936664	110933816	110934008	110937339	110937351	0.000452544	-0.29
ITGB7	SE	chr12	-	53589409	53589462	53589157	53589247	53589824	53589977	0.000452544	0.151
SGMS1	SE	chr10	-	52068001	52068055	52067741	52067908	52071021	52071175	0.00045593	-0.475
HVCN1	SE	chr12	-	111094009	111094253	111093038	111093143	111098968	111099253	0.000456346	-0.141
TSTD1	SE	chr1	-	161008340	161008424	161007702	161007865	161008669	161008774	0.000461154	0.221
PREP	SE	chr6	-	105733360	105733455	105730325	105730457	105736632	105736769	0.000461303	0.277
MINK1	SE	chr17	+	4795652	4795807	4795443	4795529	4795950	4796063	0.000463618	0.128
INPP5B	SE	chr1	-	38332337	38332423	38332130	38332215	38334172	38334286	0.000467112	-0.245
SLC12A6	SE	chr15	-	34534302	34534422	34533433	34533538	34536174	34536273	0.000468237	0.213
GLG1	SE	chr16	-	74507695	74507741	74506246	74506309	74508443	74508530	0.00047069	-0.102
TMEM11	SE	chr17	-	21114248	21114540	21101262	21102153	21117403	21117908	0.000470734	-0.152
SPG11	SE	chr15	-	44898222	44898289	44892664	44892830	44900641	44900803	0.000470734	0.198
HERC1	SE	chr15	-	63924907	63925010	63922664	63922834	63926046	63926169	0.000474063	0.212
ATAD1	SE	chr10	-	89519457	89519544	89516545	89516679	89527429	89527480	0.00047514	0.287
PHPT1	SE	chr9	+	139744957	139745012	139744464	139744589	139745206	139745495	0.000475728	0.158
MICAL1	SE	chr6	-	109768883	109768925	109768559	109768780	109769405	109769596	0.000478916	0.165
RANBP2	SE	chr2	+	109378556	109378651	109374868	109375004	109379692	109384844	0.000480784	0.328
SF3B3	SE	chr16	+	70595532	70595687	70594371	70594494	70597778	70597953	0.000485559	0.189
RSRP1	SE	chr1	-	25570944	25570989	25570040	25570124	25571640	25571792	0.000490406	0.275
ZBTB8OS	SE	chr1	-	33093108	33093145	33086816	33087549	33116029	33116191	0.000496355	0.142
AASDHPPT	SE	chr11	+	105963691	105963751	105962042	105962204	105965309	105965381	0.000498429	-0.108
GNPTG	SE	chr16	+	1411695	1411798	1402239	1402307	1411872	1411956	0.000499058	0.157
PTGDS	SE	chr9	+	139872705	139872814	139871955	139872144	139873444	139873584	0.00050333	-0.12
UFL1	SE	chr6	+	96990251	96990306	96988410	96988531	96990769	96990892	0.00050333	-0.181
OBSCN	SE	chr1	+	228495811	228496084	228494959	228495232	228496799	228496996	0.00050431	-0.287
ARPC4-TTLL3	SE	chr3	+	9859328	9859443	9854931	9855029	9862229	9862425	0.000508103	0.181
DDX20	SE	chr1	+	112299267	112299362	112298189	112298847	112302021	112302190	0.000510849	0.236
EGLN2	SE	chr19	+	41313388	41313456	41306243	41307320	41313713	41314346	0.000512714	0.161
ATP5SL	SE	chr19	-	41939176	41939339	41937222	41938313	41939441	41939578	0.000513652	-0.16
PPARD	SE	chr6	+	35389596	35389735	35378763	35378994	35391722	35391925	0.000514022	0.112
CLK4	SE	chr5	-	178044344	178044432	178043882	178043949	178045556	178045779	0.000516077	-0.375
SBF1	SE	chr22	-	50895462	50895540	50894920	50895102	50897683	50897839	0.000517759	0.192
SYNE1	SE	chr6	-	152456478	152456566	152456238	152456367	152457407	152457449	0.000522015	-0.103
FCHSD1	SE	chr5	-	141027534	141027651	141026964	141027087	141028523	141028587	0.000522581	-0.184
CNOT6	SE	chr5	+	179992819	179992977	179991674	179991743	179994087	179994242	0.000523449	0.428
SF3B3	SE	chr16	+	70594371	70594494	70590788	70590932	70597778	70597953	0.000523765	0.108
MX2	SE	chr21	+	42775481	42775563	42775193	42775270	42778670	42778925	0.000525494	-0.266
HSPH1	SE	chr13	-	31726988	31727088	31725745	31725879	31728769	31728892	0.000526443	0.226
PEX26	SE	chr22	+	18561947	18562022	18561061	18561372	18562639	18562780	0.000527165	-0.298
HLA-F	SE	chr6	+	29693791	29693820	29693223	29693340	29694179	29694303	0.000527173	0.133
EED	SE	chr11	+	85968556	85968628	85967428	85967554	85975213	85975305	0.000528816	0.221
NBEAL2	SE	chr3	+	47048555	47048645	47047822	47047939	47049014	47049187	0.000529498	0.156
GLB1	SE	chr3	-	33079406	33079507	33065742	33065817	33087611	33087724	0.000529938	-0.105
SYNRG	SE	chr17	-	35898425	35898522	35896125	35896229	35899293	35899347	0.000530544	0.102
RNF145	SE	chr5	-	158608967	158609059	158603639	158603875	158621723	158621832	0.000530544	0.111
CHSY1	SE	chr15	-	101728197	101728424	101715927	101719185	101775286	101775782	0.000535287	-0.147
TRAPPC10	SE	chr21	+	45516485	45516594	45513943	45514114	45518237	45518415	0.000535832	-0.111
RBM25	SE	chr14	+	73567008	73567070	73566374	73566458	73569899	73570186	0.000542556	0.41
RFFL	SE	chr17	-	33348389	33348800	33344541	33344625	33353392	33353580	0.000544211	-0.196
SF3B3	SE	chr16	+	70584552	70584581	70582272	70582345	70588348	70588500	0.000544211	-0.271
TNFSF12-TNFSF13	SE	chr17	+	7462940	7463019	7454259	7454295	7463365	7463484	0.000548651	0.603
ZCCHC6	SE	chr9	-	88916654	88916743	88916190	88916516	88918000	88918116	0.000549224	-0.246
TXNDC11	SE	chr16	-	11794307	11794420	11791980	11792181	11815432	11815526	0.000553021	0.288
ATHL1	SE	chr11	+	294320	294502	294098	294196	294555	295688	0.0005597	-0.467
SAR1A	SE	chr10	-	71922445	71922480	71921613	71921687	71930168	71930285	0.000563808	-0.262
LPCAT3	SE	chr12	-	7090755	7090793	7090165	7090344	7090971	7091065	0.000565536	0.137
SMURF1	SE	chr7	-	98630394	98630535	98625057	98628306	98630659	98630735	0.000567881	-0.122
ARPP19	SE	chr15	-	52861044	52861099	52849296	52849419	52861312	52861418	0.0005734	0.107
PIK3CG	SE	chr7	+	106522977	106523050	106522561	106522652	106523477	106523608	0.00057786	-0.255
ZZEF1	SE	chr17	-	3975901	3976050	3973977	3974218	3977443	3977645	0.000580622	0.161
HGSNAT	SE	chr8	+	43028855	43028886	43027452	43027529	43037287	43037403	0.000583859	0.455
MAN2C1	SE	chr15	-	75650847	75650959	75650541	75650685	75651044	75651149	0.000583859	-0.152
REPS1	SE	chr6	-	139264989	139265152	139251113	139251235	139265634	139265759	0.000586274	0.273
LGALS8	SE	chr1	+	236703863	236703983	236702178	236702389	236704953	236705010	0.00058955	0.157
EWSR1	SE	chr22	+	29684594	29684775	29682911	29683123	29688125	29688158	0.000594258	0.26
UBE2K	SE	chr4	+	39779301	39779430	39776453	39776553	39779979	39784410	0.000595422	0.141
PDCD6	SE	chr5	+	306716	306875	304291	304336	311407	311517	0.000597419	0.106
PELI1	SE	chr2	-	64331834	64331964	64327531	64327633	64335373	64335513	0.000597419	0.135
DDX21	SE	chr10	+	70731646	70731808	70729956	70730106	70734425	70734499	0.000604562	0.126
SERINC5	SE	chr5	-	79465157	79465254	79462209	79462301	79470776	79470870	0.000606847	-0.201
TPD52L2	SE	chr20	+	62514071	62514173	62505020	62505169	62520542	62520591	0.000608934	0.126
COA4	SE	chr11	-	73587436	73587620	73583712	73584439	73587801	73587890	0.000617036	-0.1
EMC8	SE	chr16	-	85819828	85820074	85814816	85814886	85822579	85822656	0.000619901	-0.198
GNPTG	SE	chr16	+	1411686	1411798	1402264	1402307	1411872	1411956	0.000625002	0.159
ITGB7	SE	chr12	-	53589409	53589626	53589157	53589247	53589824	53589983	0.000626123	0.111
CNOT6	SE	chr5	+	179992875	179992977	179991674	179991743	179994087	179994242	0.00063101	0.539
ATRX	SE	chrX	-	77023723	77023831	76972607	76972720	77041467	77041755	0.000633522	-0.133
RPS24	SE	chr10	+	79799958	79799983	79796951	79797062	79800372	79800473	0.000635368	-0.124
COX18	SE	chr4	-	73925180	73925399	73920412	73924004	73927529	73927637	0.000635673	-0.2
ATXN7	SE	chr3	+	63983198	63983363	63981180	63982159	63985125	63989136	0.00063716	-0.224
TBC1D2	SE	chr9	-	100965569	100965690	100963760	100963946	100970949	100971426	0.000637575	0.27
ZBTB44	SE	chr11	-	130106004	130106111	130096573	130104168	130106904	130106988	0.000638131	-0.247
CKAP5	SE	chr11	-	46798988	46799102	46797804	46797933	46799688	46799863	0.000638131	0.216
ANKRA2	SE	chr5	-	72850685	72850811	72850146	72850213	72851312	72851410	0.000638803	0.165
ENGASE	SE	chr17	+	77078819	77078959	77077979	77078145	77079101	77079205	0.000644992	-0.178
ENGASE	SE	chr17	+	77078808	77078959	77077979	77078145	77079101	77079205	0.000645991	-0.168
TES	SE	chr7	+	115874587	115874673	115850546	115850788	115889073	115889326	0.00065477	0.101
CSNK1D	SE	chr17	-	80203851	80203915	80200536	80202707	80206750	80206928	0.000656595	0.163
MBTPS1	SE	chr16	-	84126792	84126902	84125336	84125453	84127315	84127426	0.000657243	0.172
HDHD2	SE	chr18	-	44663605	44663667	44662709	44662820	44676748	44676871	0.00065938	-0.193
AMPD2	SE	chr1	+	110172421	110172538	110171935	110172112	110172854	110173028	0.000664067	0.308
WDR74	SE	chr11	-	62601089	62601106	62600376	62600603	62601263	62601409	0.000664067	0.344
TAMM41	SE	chr3	-	11886364	11886473	11885502	11885685	11887975	11888393	0.000664966	-0.12
IL4R	SE	chr16	+	27371940	27372136	27370236	27370315	27373572	27376099	0.000669444	0.27
IDI1	SE	chr10	-	1089938	1090111	1089240	1089333	1094803	1095061	0.000687771	-0.147
NMT1	SE	chr17	+	43174495	43174612	43173561	43173653	43175749	43175920	0.000688473	0.1
CKLF	SE	chr16	+	66597024	66597120	66592092	66592251	66599788	66600190	0.000693331	0.23
TMEM2	SE	chr9	-	74305007	74305162	74300658	74300762	74309424	74309523	0.000693331	0.18
CDAN1	SE	chr15	-	43017341	43017449	43015759	43016814	43017686	43017868	0.000696734	0.178
JKAMP	SE	chr14	+	59965182	59965334	59961735	59961942	59965444	59965626	0.000697253	-0.158
CNOT6	SE	chr5	+	179980385	179980471	179976930	179977117	179991488	179991578	0.000697253	0.127
NDOR1	SE	chr9	+	140110518	140110640	140110350	140110469	140110723	140113813	0.000697253	-0.217
U2SURP	SE	chr3	+	142753751	142753817	142752112	142752192	142754823	142754946	0.000697253	0.123
ANP32A	SE	chr15	-	69079751	69079874	69076735	69076934	69113036	69113261	0.000702887	0.174
CRBN	SE	chr3	-	3196430	3196515	3195107	3195172	3197902	3197965	0.000707106	0.126
RTN4	SE	chr2	-	55252221	55254621	55214626	55214834	55255299	55255356	0.000720666	-0.357
PRKCD	SE	chr3	+	53199119	53199231	53195222	53195444	53212419	53212553	0.000721454	0.244
PPP4R3A	SE	chr14	-	91935238	91935347	91932604	91932760	91937180	91937339	0.000721454	0.174
OTUD4	SE	chr4	-	146077087	146077148	146076720	146076838	146080654	146080787	0.000726548	0.136
B4GALT1	SE	chr9	-	33120416	33120604	33113771	33113876	33135186	33135422	0.000729178	0.267
IRF7	SE	chr11	-	613950	614037	613784	613865	614475	614534	0.000739062	0.176
SACM1L	SE	chr3	+	45755221	45755299	45754628	45754688	45755537	45755571	0.000740556	-0.236
SSFA2	SE	chr2	+	182783049	182783152	182781616	182781732	182783324	182783402	0.000742546	-0.4
RABGGTB	SE	chr1	+	76257881	76257991	76257123	76257256	76259768	76259918	0.000744928	0.221
PAPD5	SE	chr16	+	50256216	50256345	50251466	50251574	50257084	50257311	0.000748036	0.207
MRPL55	SE	chr1	-	228296655	228296722	228295935	228296019	228296849	228297013	0.000748914	0.364
ABR	SE	chr17	-	914384	914438	913968	914103	915085	915225	0.000750387	-0.137
SIKE1	SE	chr1	-	115321552	115321671	115318966	115319080	115321762	115321905	0.00075064	-0.105
SRSF10	SE	chr1	-	24305142	24305307	24304400	24304763	24306680	24306953	0.00075065	-0.122
PRDX3	SE	chr10	-	120933962	120934104	120933248	120933384	120938266	120938377	0.000759681	0.412
MVP	SE	chr16	+	29845646	29845758	29845255	29845387	29847024	29847119	0.000769515	-0.132
APOL1	SE	chr22	+	36655714	36655902	36653364	36653453	36657641	36657768	0.000773767	-0.491
PAPD4	SE	chr5	+	78919074	78919312	78915816	78915906	78936673	78936788	0.000784988	-0.106
STAC3	SE	chr12	-	57638927	57638994	57638698	57638748	57640586	57640684	0.000786209	0.292
CNOT1	SE	chr16	-	58592376	58592578	58590750	58590897	58594115	58594266	0.000792792	0.232
PDIA6	SE	chr2	-	10925059	10925152	10923516	10924452	10927406	10927565	0.000793174	0.311
RFTN1	SE	chr3	-	16364882	16364964	16357351	16358739	16399438	16399554	0.000797639	0.183
ANKRD37	SE	chr4	+	186320090	186320182	186318303	186318456	186320723	186320927	0.000797896	0.285
GBP3	SE	chr1	-	89477429	89477710	89475074	89475177	89478867	89479110	0.000801611	0.509
CHD8	SE	chr14	-	21859621	21859801	21859105	21859222	21859991	21860105	0.000801791	-0.154
AFF4	SE	chr5	-	132233921	132234084	132232014	132232932	132234795	132234833	0.000807444	0.218
RNF103	SE	chr2	-	86841979	86842153	86839281	86839397	86847452	86847592	0.000807494	-0.487
NSUN5P2	SE	chr7	-	72424789	72425018	72420596	72420735	72425163	72425302	0.000817912	0.1
WDR70	SE	chr5	+	37722956	37723036	37721216	37721317	37725035	37725152	0.000822714	0.199
CD53	SE	chr1	+	111437459	111437677	111434013	111434093	111441745	111442558	0.000823664	-0.123
UTP6	SE	chr17	-	30205720	30205800	30205268	30205346	30207591	30207773	0.000828974	0.282
SLC30A9	SE	chr4	+	42020405	42020522	42020127	42020187	42022432	42022532	0.0008311	-0.157
CEPT1	SE	chr1	+	111709727	111709812	111703776	111703918	111717500	111717585	0.000837449	-0.323
MED6	SE	chr14	-	71059596	71059632	71057982	71058098	71060012	71060095	0.000837449	0.52
PPP4R3B	SE	chr2	-	55792291	55792347	55792037	55792177	55795329	55795499	0.000839173	-0.27
MIEF1	SE	chr22	+	39907292	39907443	39900207	39900539	39907853	39908031	0.000839852	0.264
PLEKHM1	SE	chr17	-	43559802	43559891	43552465	43553092	43568017	43568146	0.000851776	0.123
ENGASE	SE	chr17	+	77078770	77078959	77077979	77078145	77079101	77079205	0.000853755	-0.175
TBC1D1	SE	chr4	+	38047437	38047524	38037208	38037319	38051238	38051519	0.000864802	0.117
FN3KRP	SE	chr17	+	80678636	80678841	80678125	80678239	80680679	80680762	0.000864989	-0.313
NOTCH2	SE	chr1	-	120491629	120491749	120484148	120484377	120493346	120493460	0.000873073	0.58
DHX9	SE	chr1	+	182812428	182812569	182808438	182808591	182821367	182821479	0.000879134	0.127
MVP	SE	chr16	+	29845636	29845758	29845255	29845387	29847024	29847119	0.000883002	-0.126
ZFAS1	SE	chr20	+	47897439	47897501	47897021	47897107	47905581	47905795	0.000886571	0.105
ATF7IP	SE	chr12	+	14610140	14610229	14609494	14609568	14613428	14614067	0.000901685	0.1
KMT2D	SE	chr12	-	49424383	49424551	49424062	49424222	49424957	49427747	0.00090599	0.215
BPGM	SE	chr7	+	134343099	134343420	134331530	134331689	134346198	134346860	0.000906819	-0.113
ACP2	SE	chr11	-	47266285	47266502	47264789	47264872	47266855	47266973	0.000916516	0.393
SLC5A6	SE	chr2	-	27424217	27424321	27423865	27423981	27424533	27424715	0.000927837	0.322
RBM39	SE	chr20	-	34328446	34328519	34326889	34326939	34328727	34328809	0.000930674	0.119
DOK2	SE	chr8	-	21769411	21769493	21768211	21768368	21769739	21770021	0.000932372	0.142
RARS2	SE	chr6	-	88229897	88229974	88228541	88228609	88231181	88231242	0.000940326	0.284
PDCD6	SE	chr5	+	306716	306869	304291	304336	311407	311517	0.000943383	0.178
RASA1	SE	chr5	+	86675551	86675667	86674212	86674355	86679529	86679597	0.000946588	0.202
GALK2	SE	chr15	+	49600804	49600974	49584523	49584734	49611800	49612002	0.000949454	-0.339
LBR	SE	chr1	-	225599038	225599142	225597992	225598118	225600155	225600347	0.000949454	0.119
MARK3	SE	chr14	+	103932308	103932436	103931893	103932130	103932679	103932779	0.000949757	0.169
P4HA1	SE	chr10	-	74803644	74803715	74790028	74790128	74806682	74806859	0.000954296	0.285
MRPS27	SE	chr5	-	71522876	71523102	71521883	71522026	71524092	71524195	0.000978189	-0.121
SDHAF2	SE	chr11	+	61205475	61205592	61197596	61197654	61213412	61214239	0.000982761	-0.165
EWSR1	SE	chr22	+	29684576	29684775	29682911	29683123	29687553	29687588	0.000988061	0.14
TUBGCP5	SE	chr15	+	22868548	22868699	22867457	22867636	22868840	22868966	0.0009892	-0.193
EXOSC8	SE	chr13	+	37576409	37576446	37574677	37574959	37576624	37576688	0.00098932	0.109
TPD52L2	SE	chr20	+	62514102	62514173	62505020	62505169	62520542	62520591	0.00100051	0.18
TSTD1	SE	chr1	-	161008340	161008484	161007702	161007865	161008669	161008774	0.00100521	0.219
RBL2	SE	chr16	+	53503982	53504097	53500969	53501081	53504294	53504575	0.00100533	0.167
PICALM	SE	chr11	-	85701292	85701421	85694908	85695016	85707868	85707972	0.00102108	-0.33
ZNF276	SE	chr16	+	89789544	89789591	89788938	89789242	89789667	89790117	0.00102261	0.119
DDB1	SE	chr11	-	61091738	61091859	61091450	61091609	61093082	61093180	0.00102302	-0.113
AAMP	SE	chr2	-	219130777	219130870	219130553	219130669	219131165	219131310	0.00102605	0.171
C1orf159	SE	chr1	-	1026657	1026754	1025732	1025808	1026851	1026945	0.00102802	0.227
EMP3	SE	chr19	+	48830777	48830887	48828628	48828867	48832608	48832749	0.00102892	0.172
XRN1	SE	chr3	-	142145585	142145683	142144270	142144380	142151502	142151735	0.00102947	0.175
SHC1	SE	chr1	-	154946309	154946521	154942507	154942675	154946723	154946959	0.0010311	-0.208
RPL7L1	SE	chr6	+	42853711	42853821	42852350	42852488	42853993	42854731	0.00103925	0.121
MGAT1	SE	chr5	-	180222837	180222875	180217540	180220097	180230812	180230902	0.00104058	-0.403
PHF12	SE	chr17	-	27235800	27235899	27233873	27234012	27237243	27237387	0.00104306	0.136
SMAP2	SE	chr1	+	40869355	40869418	40841418	40841488	40872407	40872541	0.0010478	0.247
EPSTI1	SE	chr13	-	43469144	43469244	43460523	43462638	43474445	43474519	0.00105487	-0.153
COQ9	SE	chr16	+	57490842	57490927	57490415	57490558	57492157	57492262	0.001055	0.122
PIP5K1C	SE	chr19	-	3661370	3661524	3660963	3661081	3661868	3661999	0.00105566	-0.103
TOP2B	SE	chr3	-	25659908	25659993	25656921	25657077	25660144	25660340	0.00105583	0.137
PDE4A	SE	chr19	+	10568325	10568456	10565504	10565598	10568554	10568778	0.00105783	-0.15
RRN3	SE	chr16	-	15166806	15166937	15164977	15165108	15168579	15168718	0.00106285	0.121
PEF1	SE	chr1	-	32098759	32098915	32098095	32098239	32110441	32110838	0.00106285	0.146
MGST2	SE	chr4	+	140616350	140616421	140599696	140599796	140624608	140624690	0.00106333	0.405
RALGAPB	SE	chr20	+	37177331	37177438	37169683	37169835	37179713	37179866	0.00107121	0.199
FASTK	SE	chr7	-	150774187	150774323	150773707	150773919	150774396	150774488	0.00107759	0.124
UCHL3	SE	chr13	+	76124111	76124123	76123885	76123998	76134888	76135017	0.00108081	-0.114
GAS6-AS1	SE	chr13	+	114537656	114537737	114536464	114536552	114541049	114541220	0.00108443	0.332
CIITA	SE	chr16	+	11016263	11016347	11016023	11016107	11017084	11017182	0.00111208	0.113
CCDC107	SE	chr9	+	35658968	35659177	35658572	35658724	35660397	35660458	0.00111592	-0.114
GAS6-AS1	SE	chr13	+	114537550	114537737	114536464	114536552	114541049	114541220	0.00112179	0.32
DDX42	SE	chr17	+	61876948	61876985	61875397	61875459	61877827	61877977	0.00112179	0.219
ZC3H4	SE	chr19	-	47586840	47586960	47585440	47585552	47587601	47587712	0.00112196	-0.203
EIF4G3	SE	chr1	-	21154109	21154191	21151592	21151691	21155639	21155765	0.00113846	0.244
NUB1	SE	chr7	+	151071182	151071287	151064946	151065054	151072933	151073029	0.00114453	0.179
KDM4C	SE	chr9	+	7015852	7015929	7013787	7014001	7046861	7046917	0.00114703	0.137
FAM129A	SE	chr1	-	184775079	184775190	184772718	184772826	184777207	184777369	0.00114703	0.182
HNRNPH3	SE	chr10	+	70097614	70097753	70096955	70097090	70098259	70098426	0.00116855	0.218
ATP6V1B2	SE	chr8	+	20072328	20072479	20070292	20070416	20073923	20074006	0.00116917	0.337
TSTD1	SE	chr1	-	161008340	161008501	161007702	161007865	161008669	161008774	0.00116982	0.222
ASXL2	SE	chr2	-	25976402	25976508	25972564	25973282	25978886	25978983	0.00117073	0.219
WNK1	SE	chr12	+	1009641	1009836	1006644	1006847	1017012	1017200	0.00117281	0.115
ENGASE	SE	chr17	+	77078810	77078959	77077979	77078145	77079101	77079205	0.00117846	-0.17
SLC39A9	SE	chr14	+	69908548	69908689	69890810	69890919	69908785	69908983	0.00118042	-0.268
WDR33	SE	chr2	-	128467063	128467156	128466250	128466466	128467266	128467430	0.00118521	0.136
SAMD4B	SE	chr19	+	39844645	39844706	39833098	39833216	39847328	39847729	0.00118779	0.229
LAMTOR3	SE	chr4	-	100815111	100815157	100813156	100813191	100815491	100815703	0.0011931	0.398
NUTM2A-AS1	SE	chr10	-	89067713	89067817	89048198	89048252	89086386	89086429	0.00120061	0.197
FAM63A	SE	chr1	-	150970557	150970749	150970099	150970255	150971844	150971987	0.00120911	0.154
WDR44	SE	chrX	+	117570664	117570787	117566743	117566857	117575330	117575522	0.00121139	0.239
FCMR	SE	chr1	-	207094685	207094778	207086244	207086387	207095162	207095235	0.00121399	-0.104
REPS1	SE	chr6	-	139262471	139262626	139251113	139251235	139265634	139265759	0.00122136	0.201
CTDP1	SE	chr18	+	77496354	77496521	77464766	77464917	77513651	77514510	0.00122403	0.158
ELOVL1	SE	chr1	-	43830856	43831047	43830598	43830679	43831234	43831294	0.00123565	-0.109
PPP3CC	SE	chr8	+	22397324	22397449	22390433	22390531	22398127	22398657	0.00124102	-0.268
TNIK	SE	chr3	-	170895114	170895169	170893040	170893119	170906490	170906621	0.00124738	0.129
LAT2	SE	chr7	+	73635966	73636022	73635033	73635064	73638053	73638113	0.00124945	0.158
UBA5	SE	chr3	+	132384666	132384697	132379139	132379542	132387661	132387771	0.00125215	0.447
ACO2	SE	chr22	+	41895729	41895866	41865128	41865186	41903794	41904053	0.00125841	0.104
MCCC1	SE	chr3	-	182735053	182735125	182733005	182733354	182737917	182738025	0.00126074	0.266
CARD8	SE	chr19	-	48722123	48722269	48718596	48718641	48724986	48725112	0.00127371	0.192
ZFAND2B	SE	chr2	+	220073698	220073771	220073293	220073361	220073983	220074373	0.00128315	0.133
RNF38	SE	chr9	-	36390550	36390613	36375930	36376124	36400550	36400920	0.00129159	-0.285
FCMR	SE	chr1	-	207087206	207087439	207086273	207086387	207095162	207095235	0.00129428	-0.112
NSUN2	SE	chr5	-	6607312	6607497	6606932	6607025	6609938	6610035	0.00130006	0.212
ATRIP	SE	chr3	+	48505980	48506061	48505442	48505531	48506229	48506482	0.00130018	0.549
TNFSF13	SE	chr17	+	7462940	7463019	7461608	7462614	7463365	7463484	0.00131141	0.118
ZNF337	SE	chr20	-	25672135	25672236	25667026	25667102	25677394	25677540	0.00131329	-0.342
NLRC5	SE	chr16	+	57089344	57089431	57088943	57089006	57092883	57093020	0.00131701	0.108
CCDC6	SE	chr10	-	61554230	61554355	61548505	61552869	61564177	61564278	0.00133452	0.114
CD53	SE	chr1	+	111439280	111439355	111437581	111437677	111441745	111442558	0.00134817	0.351
CSF3R	SE	chr1	-	36945587	36945681	36945033	36945117	36947078	36947138	0.00135067	-0.109
ULK1	SE	chr12	+	132391584	132391707	132391436	132391469	132392039	132392076	0.00135555	0.148
CCNL2	SE	chr1	-	1328058	1328183	1326145	1326245	1328775	1328840	0.00135828	-0.126
MTMR6	SE	chr13	-	25829079	25829175	25828522	25828572	25831333	25831459	0.00137187	-0.162
UBALD1	SE	chr16	-	4660493	4660556	4658883	4659984	4664678	4664927	0.00137964	0.109
POLR2B	SE	chr4	+	57888343	57888412	57887064	57887161	57889495	57889746	0.00137964	0.187
SH3TC1	SE	chr4	+	8216898	8217072	8216201	8216307	8217837	8217984	0.00138778	-0.161
EXOSC8	SE	chr13	+	37576409	37576446	37575885	37575938	37576624	37576688	0.00139106	0.135
DYRK1A	SE	chr21	+	38802570	38802702	38792600	38792686	38844985	38845182	0.00139538	-0.148
MRPL55	SE	chr1	-	228296655	228296722	228295935	228296019	228296961	228297013	0.00139716	0.333
NSUN2	SE	chr5	-	6605385	6605488	6604579	6604798	6606932	6607025	0.00139848	0.366
PDPK1	SE	chr16	+	2647123	2647276	2636676	2636894	2647651	2653191	0.00140242	0.276
UBE3C	SE	chr7	+	157046937	157047004	157046647	157046836	157049607	157049738	0.00141459	0.154
RNH1	SE	chr11	-	504823	504996	502061	502181	506608	506821	0.00142936	0.143
EIF4G1	SE	chr3	+	184033276	184033333	184032289	184032462	184033550	184033644	0.00143042	0.246
ZC3H4	SE	chr19	-	47586840	47586938	47585440	47585552	47587601	47587712	0.00143741	-0.181
HNRNPA2B1	SE	chr7	-	26233194	26233218	26232870	26232993	26235466	26235529	0.00143795	0.178
HNRNPD	SE	chr4	-	83280721	83280792	83279811	83279973	83294598	83294816	0.00145507	0.153
RPUSD3	SE	chr3	-	9883882	9883927	9883666	9883766	9885573	9885702	0.00145507	0.122
PAPD4	SE	chr5	+	78944884	78945013	78944439	78944516	78952780	78952824	0.00146455	0.199
TOR1AIP1	SE	chr1	+	179883132	179883189	179877739	179877808	179886586	179889212	0.00146865	-0.153
LINC01237	SE	chr2	+	242876224	242876361	242824710	242824786	242908077	242908198	0.0014857	-0.335
HDAC10	SE	chr22	-	50687531	50687597	50687090	50687288	50687756	50687883	0.00149337	0.117
PTBP2	SE	chr1	+	97271974	97272008	97270355	97270495	97272421	97272514	0.0014939	-0.427
UBN1	SE	chr16	+	4918833	4918904	4910664	4911103	4920212	4920342	0.00150151	0.218
COPS8	SE	chr2	+	237996160	237996206	237995769	237995840	237997247	237997296	0.00150855	-0.144
SEL1L3	SE	chr4	-	25777898	25777982	25769361	25769452	25783863	25784040	0.00151751	0.145
FAM63A	SE	chr1	-	150970557	150970707	150970099	150970255	150971844	150971987	0.00152335	0.254
G3BP2	SE	chr4	-	76582038	76582198	76580951	76581054	76582740	76582914	0.00153338	0.304
NUP153	SE	chr6	-	17661883	17661951	17649393	17649531	17662248	17662301	0.00153512	0.22
TMEM260	SE	chr14	+	57101839	57101994	57101616	57101670	57103225	57103316	0.0015363	-0.266
DENND1A	SE	chr9	-	126174054	126174108	126165680	126165769	126202638	126202770	0.00155912	0.124
EIF4G1	SE	chr3	+	184033919	184034006	184032282	184032462	184037476	184037589	0.00156219	0.14
PILRA	SE	chr7	+	99995501	99995535	99987510	99987729	99996913	99996963	0.00156337	0.242
MAP4K1	SE	chr19	-	39105029	39105079	39104884	39104932	39106834	39106899	0.00156404	0.137
CNOT2	SE	chr12	+	70724066	70724249	70723202	70723350	70729217	70729343	0.00157449	0.318
MYL6	SE	chr12	+	56553281	56553406	56552467	56552495	56553758	56553932	0.00157965	0.124
TNKS2	SE	chr10	+	93594386	93594494	93593609	93593781	93596675	93596755	0.0015821	-0.111
RNF219	SE	chr13	-	79217160	79217303	79216256	79216348	79218996	79219132	0.00158857	-0.176
CSGALNACT2	SE	chr10	+	43662451	43662546	43655941	43656043	43671398	43671480	0.00160136	0.102
LONP1	SE	chr19	-	5708352	5708414	5707070	5707154	5711781	5712013	0.00160253	0.158
WNK1	SE	chr12	+	977031	978270	971248	971436	980430	980514	0.00160441	-0.181
TRPV2	SE	chr17	+	16335097	16335164	16332130	16332296	16335279	16335614	0.00162081	0.107
KIAA0319L	SE	chr1	-	35907846	35907937	35906647	35906739	35908506	35908690	0.00162452	0.324
RCBTB1	SE	chr13	-	50112005	50112219	50106081	50108398	50115011	50115142	0.0016265	-0.131
RBM5	SE	chr3	+	50147811	50147896	50147035	50147121	50148111	50148203	0.00162721	0.174
DDX42	SE	chr17	+	61876839	61876985	61875397	61875459	61877827	61877977	0.00163603	0.225
HDAC5	SE	chr17	-	42157474	42157613	42156511	42156645	42157768	42157866	0.00163975	0.201
SEL1L	SE	chr14	-	81950568	81950765	81945955	81946084	81952015	81952090	0.00164476	0.336
SEC24B	SE	chr4	+	110421049	110421210	110415770	110416012	110427486	110427668	0.00165112	-0.248
SFT2D1	SE	chr6	-	166736344	166736374	166733215	166733744	166741763	166741845	0.00165223	0.175
RCE1	SE	chr11	+	66611756	66611835	66611426	66611510	66612339	66612507	0.00165481	0.109
CD53	SE	chr1	+	111437581	111437677	111434013	111434093	111441745	111442558	0.00165728	-0.118
RAB30	SE	chr11	-	82705080	82705164	82698628	82698812	82708265	82708366	0.00166797	0.23
TRPV2	SE	chr17	+	16329392	16329583	16326782	16327081	16330035	16330204	0.00167792	0.117
TAF11	SE	chr6	-	34848065	34848122	34845554	34846497	34850708	34850857	0.00168476	0.701
DMXL1	SE	chr5	+	118407249	118407351	118406781	118406952	118433673	118435111	0.00169031	-0.153
GMFG	SE	chr19	-	39826074	39826194	39820187	39820266	39826613	39826726	0.00169462	0.415
HNRNPD	SE	chr4	-	83280696	83280792	83279811	83279973	83294598	83294816	0.00169599	0.14
MEF2B	SE	chr19	-	19257081	19257193	19256375	19256831	19257363	19257457	0.0016964	0.308
STT3B	SE	chr3	+	31661167	31661258	31659431	31659480	31663588	31663814	0.00169705	0.126
NARS	SE	chr18	-	55270956	55271082	55270043	55270175	55273088	55273202	0.00170126	-0.285
AMPD2	SE	chr1	+	110172417	110172538	110171948	110172112	110172854	110173028	0.00170466	0.243
ABCC4	SE	chr13	-	95690883	95690990	95686858	95686993	95695935	95696041	0.00171149	-0.294
NSUN2	SE	chr5	-	6605399	6605521	6604717	6604798	6606932	6607025	0.0017138	0.318
TRA2A	SE	chr7	-	23561750	23562051	23561325	23561459	23570799	23570889	0.001716	-0.352
PHKB	SE	chr16	+	47497792	47497904	47495209	47495337	47531309	47531399	0.00172062	-0.271
NPHP3-ACAD11	SE	chr3	-	132402242	132402388	132401546	132401662	132403397	132403638	0.00173796	0.4
RNF38	SE	chr9	-	36390463	36390613	36375930	36376124	36400550	36400920	0.00175172	-0.191
SNAPIN	SE	chr1	+	153631613	153631660	153631129	153631362	153631923	153632042	0.00175605	0.223
TMEM209	SE	chr7	-	129821462	129821559	129815351	129815449	129824023	129824095	0.00176237	0.317
IGF2R	SE	chr6	+	160455450	160455554	160453973	160454139	160461591	160461756	0.00178636	0.144
ARHGAP17	SE	chr16	-	24970991	24971066	24965923	24966051	24971231	24971300	0.00178975	0.165
RFTN1	SE	chr3	-	16368279	16368383	16357351	16358739	16399438	16399554	0.00179841	0.152
EGLN2	SE	chr19	+	41312459	41312579	41306243	41307320	41313713	41314346	0.00179859	0.258
APPBP2	SE	chr17	-	58532666	58532765	58531662	58531853	58533656	58533742	0.00181705	-0.151
DDHD1	SE	chr14	-	53562834	53562936	53560033	53560162	53569748	53569769	0.00182695	0.429
SLC18B1	SE	chr6	-	133092028	133092078	133090506	133091475	133092174	133092268	0.00184713	0.138
GRK5	SE	chr10	+	121201510	121201600	121199242	121199280	121203055	121203264	0.00185183	0.112
FNBP4	SE	chr11	-	47753668	47753771	47752925	47753113	47754088	47754222	0.00185351	-0.192
C9orf41	SE	chr9	-	77614645	77614786	77613513	77613692	77631183	77631347	0.00186092	0.657
SOS2	SE	chr14	-	50625282	50625364	50623716	50623839	50626148	50626804	0.00186955	0.301
SLC25A24	SE	chr1	-	108686164	108686332	108681679	108681830	108690900	108691008	0.00187289	0.132
GCN1	SE	chr12	-	120582442	120582639	120582109	120582252	120582726	120582865	0.00187909	-0.141
NSUN5P1	SE	chr7	+	75044869	75045048	75044397	75044512	75045380	75045469	0.00189144	-0.122
ORC4	SE	chr2	-	148695714	148695782	148687965	148693267	148695866	148695962	0.00189234	0.199
ZNF542P	SE	chr19	+	56880647	56880706	56880234	56880305	56884525	56884652	0.001908	-0.749
ITGA6	SE	chr2	+	173354212	173354341	173352853	173352956	173355751	173355850	0.00191755	-0.232
KANSL3	SE	chr2	-	97276800	97276875	97276462	97276620	97278018	97278090	0.00192536	0.239
DIS3	SE	chr13	-	73335500	73335659	73334666	73334789	73335783	73335952	0.00192998	0.194
SFXN2	SE	chr10	+	104484692	104484753	104474297	104474438	104486368	104486554	0.00193076	0.194
SUV420H1	SE	chr11	-	67953247	67953395	67942484	67942650	67957383	67957619	0.00193076	0.1
NBR1	SE	chr17	+	41354671	41354729	41353702	41353797	41355697	41355803	0.00194314	0.164
CCM2	SE	chr7	+	45103516	45103600	45067232	45067396	45112324	45112382	0.00194668	0.21
CARD8	SE	chr19	-	48722127	48722269	48718596	48718641	48724986	48725112	0.00194848	0.142
ITGB7	SE	chr12	-	53589409	53589431	53589157	53589247	53589824	53589983	0.00196385	0.273
EIF2B5	SE	chr3	+	183861218	183861353	183860839	183860930	183861886	183862012	0.00196434	0.233
AHCTF1	SE	chr1	-	247007096	247007171	247005995	247006078	247012916	247014744	0.00197015	0.23
TRPV2	SE	chr17	+	16329349	16329583	16326782	16327081	16330035	16330129	0.00198407	0.115
ARIH2	SE	chr3	+	48999044	48999112	48964894	48965246	49002351	49002415	0.00198633	0.234
MARK3	SE	chr14	+	103958113	103958371	103946733	103946827	103969218	103970166	0.0019889	-0.155
XRN1	SE	chr3	-	142095538	142095637	142095320	142095436	142098923	142099022	0.00200107	-0.131
SLMAP	SE	chr3	+	57911571	57911661	57908615	57908750	57913022	57915730	0.00200186	0.249
APOL1	SE	chr22	+	36655319	36655443	36653364	36653453	36657641	36657768	0.00200791	-0.48
METTL14	SE	chr4	+	119621704	119621797	119618336	119618478	119625089	119625206	0.00200864	0.18
PUM2	SE	chr2	-	20478343	20478580	20462953	20463221	20482707	20482992	0.00201196	-0.249
EXOC1	SE	chr4	+	56762065	56762178	56759717	56759946	56762882	56763066	0.00201348	-0.174
PHKB	SE	chr16	+	47699852	47699943	47697587	47697645	47703125	47703328	0.00201901	0.139
AFAP1	SE	chr4	-	7802677	7802781	7802168	7802380	7811340	7811490	0.00202165	-0.3
NSL1	SE	chr1	-	212912875	212912943	212899494	212912028	212955713	212955768	0.00202706	0.224
PAN3	SE	chr13	+	28846117	28846208	28844837	28845003	28851373	28851513	0.00203119	0.322
PLEKHM1	SE	chr17	-	43559798	43559891	43552465	43553092	43568017	43568146	0.00205491	0.126
CRYZ	SE	chr1	-	75172786	75172888	75172582	75172678	75175781	75175931	0.00205491	0.274
ELMO1	SE	chr7	-	36927164	36927277	36909997	36910080	36934458	36934622	0.00205712	0.116
CLDND1	SE	chr3	-	98240173	98240281	98237728	98237839	98241692	98241910	0.00205812	-0.527
AMZ2P1	SE	chr17	-	62969359	62969635	62968871	62969045	62970672	62971703	0.00207639	-0.258
RABEP1	SE	chr17	+	5266206	5266311	5264502	5264970	5268416	5268533	0.00208176	0.107
TBC1D14	SE	chr4	+	7011603	7011675	7000811	7000929	7012379	7012508	0.00209897	0.218
NPHP3-ACAD11	SE	chr3	-	132402242	132402368	132401546	132401662	132403397	132403638	0.00209897	0.277
RASSF7	SE	chr11	+	561761	561892	560970	561033	562078	562776	0.00211265	-0.101
TRA2A	SE	chr7	-	23561972	23562051	23561325	23561459	23571407	23571660	0.00211361	-0.17
GAS6-AS1	SE	chr13	+	114537652	114537737	114536464	114536552	114541049	114541220	0.00211816	0.322
CTR9	SE	chr11	+	10777224	10777342	10776504	10776744	10778295	10778385	0.00212101	0.228
BCR	SE	chr22	+	23632410	23632600	23631703	23631808	23634727	23634825	0.00212264	0.265
MATR3	SE	chr5	+	138643847	138644016	138629438	138629461	138650363	138650425	0.00214988	0.228
ZMYM6	SE	chr1	-	35478264	35478315	35478031	35478182	35480297	35480489	0.00215425	-0.37
ERC1	SE	chr12	+	1591202	1591377	1553727	1553916	1599258	1605099	0.00216183	-0.14
SLC25A45	SE	chr11	-	65149345	65149440	65147602	65147646	65149956	65150042	0.00217723	0.276
NLRC5	SE	chr16	+	57089347	57089431	57088943	57089006	57092883	57093020	0.00217903	0.112
EDAR	SE	chr2	-	109547419	109547488	109546575	109546698	109605415	109605828	0.00218887	0.424
PBRM1	SE	chr3	-	52678719	52678805	52677263	52677359	52682359	52682458	0.0021933	0.122
HSPH1	SE	chr13	-	31722095	31722229	31719699	31719905	31724090	31724319	0.00220832	0.127
ELP3	SE	chr8	+	28013458	28013549	27995214	27995408	28016084	28016150	0.00222752	0.135
TXNDC11	SE	chr16	-	11827837	11827935	11824500	11824630	11829872	11830089	0.00222752	0.213
ASH2L	SE	chr8	+	37974167	37974243	37972422	37972518	37976787	37976881	0.00222829	0.222
MSTO2P	SE	chr1	+	155717767	155717918	155717552	155717687	155718190	155718322	0.00225341	-0.155
RINT1	SE	chr7	+	105189275	105189414	105189000	105189157	105190501	105190612	0.00226994	-0.261
MGAT1	SE	chr5	-	180222837	180222875	180217540	180220097	180229679	180230048	0.00227648	-0.166
TRIM33	SE	chr1	-	114945381	114945505	114942078	114942231	114948031	114948381	0.0022824	0.111
PPP1R2	SE	chr3	-	195250489	195250579	195245814	195245982	195251616	195251694	0.00229842	0.1
MLX	SE	chr17	+	40720854	40720961	40720487	40720577	40721524	40721624	0.00230027	0.195
VPS39	SE	chr15	-	42483483	42483570	42483322	42483365	42483693	42483758	0.00231637	-0.272
NCF2	SE	chr1	-	183542319	183542427	183539914	183539974	183546733	183546842	0.00233161	0.19
POLR2B	SE	chr4	+	57888348	57888412	57887064	57887161	57889495	57889746	0.00233637	0.191
KDM6A	SE	chrX	+	44945109	44945224	44942704	44942853	44948987	44949175	0.00234232	0.148
UBASH3A	SE	chr21	+	43855492	43855619	43854941	43855064	43857597	43857690	0.00237843	-0.112
TAF11	SE	chr6	-	34847402	34847508	34845554	34846497	34850708	34850857	0.00238377	0.356
SLC37A1	SE	chr21	+	43994927	43995025	43988469	43988548	44000454	44001550	0.00240727	0.274
NCK2	SE	chr2	+	106497783	106498505	106471503	106471745	106509437	106510730	0.00241387	0.204
REPS1	SE	chr6	-	139238691	139238764	139235820	139235898	139241351	139241453	0.00241409	0.329
HDAC10	SE	chr22	-	50687126	50687180	50686794	50686901	50687756	50687883	0.00241433	0.481
TMEM234	SE	chr1	-	32683037	32683178	32682859	32682952	32686731	32686798	0.00241433	-0.162
NSUN2	SE	chr5	-	6622128	6622213	6620218	6620411	6623326	6623398	0.00241638	0.125
SSFA2	SE	chr2	+	182783049	182783197	182779942	182781154	182783324	182783402	0.00242059	-0.187
NSD1	SE	chr5	+	176709465	176709582	176707565	176707835	176710787	176710929	0.00242059	0.14
ATXN2L	SE	chr16	+	28847769	28847806	28847253	28847443	28848048	28848558	0.00242985	0.131
ABR	SE	chr17	-	915706	915797	915085	915225	915927	916037	0.00243093	-0.13
ZBTB43	SE	chr9	+	129571161	129571194	129567284	129567411	129594765	129600487	0.00244016	0.108
NCOR2	SE	chr12	-	124811954	124812163	124810736	124810916	124815390	124815444	0.00244016	-0.178
TMEM63A	SE	chr1	-	226054811	226054863	226053596	226053667	226055587	226055730	0.00245073	0.195
BCR	SE	chr22	+	23632414	23632600	23631703	23631808	23634727	23634825	0.00246507	0.262
FAM208B	SE	chr10	+	5804494	5804609	5803252	5803434	5804991	5805703	0.00248143	0.107
SYNE1	SE	chr6	-	152451854	152451913	152442818	152443811	152453256	152453349	0.00248374	0.138
USP40	SE	chr2	-	234399677	234399717	234398010	234398129	234399812	234399907	0.00249349	-0.285
ACAA1	SE	chr3	-	38173086	38173129	38170780	38170879	38173416	38173496	0.00249988	0.185
USP12	SE	chr13	-	27646913	27647044	27645207	27645286	27649327	27649525	0.00249988	-0.108
RB1CC1	SE	chr8	-	53573155	53573217	53571432	53571536	53573485	53573567	0.00249988	0.173
MRPL55	SE	chr1	-	228296137	228296175	228295935	228296019	228296961	228297013	0.00250856	-0.362
AHCTF1	SE	chr1	-	247007096	247007230	247005995	247006078	247012916	247014744	0.00253287	0.235
FAM120B	SE	chr6	+	170700100	170700209	170697374	170697581	170704574	170704667	0.00253736	0.262
ITGA6	SE	chr2	+	173354212	173354386	173352853	173352956	173355751	173355850	0.00256509	-0.205
FBXO42	SE	chr1	-	16578782	16578899	16578390	16578476	16579590	16579647	0.00256698	0.229
CASP8	SE	chr2	+	202137624	202137665	202137360	202137499	202139611	202139676	0.0025831	0.18
FBXO5	SE	chr6	-	153294180	153294271	153293406	153293589	153296041	153296756	0.00258478	0.329
FAM53C	SE	chr5	+	137676872	137676953	137673703	137673996	137677497	137677555	0.00258801	-0.19
HBP1	SE	chr7	+	106829736	106829857	106827013	106827126	106830617	106830762	0.00259247	0.241
MYLIP	SE	chr6	+	16143929	16144094	16143250	16143448	16145127	16145548	0.00261461	-0.109
TNFSF10	SE	chr3	-	172227006	172227084	172223297	172224709	172229406	172229449	0.00261699	0.108
ATG9A	SE	chr2	-	220093155	220093204	220092643	220092775	220094256	220094410	0.00261737	0.344
RNH1	SE	chr11	-	504823	504996	502061	502181	507112	507283	0.00263351	0.133
TSTD1	SE	chr1	-	161008288	161008463	161007702	161007865	161008669	161008774	0.00264713	0.151
DCP2	SE	chr5	+	112343634	112343739	112337263	112337371	112346452	112346504	0.00264835	0.198
KCTD20	SE	chr6	+	36446897	36447000	36437828	36438034	36447367	36447488	0.00264835	0.336
SON	SE	chr21	+	34944856	34944936	34941276	34941393	34945613	34945761	0.00265357	-0.101
TXNDC11	SE	chr16	-	11827837	11827935	11824500	11824630	11836332	11836734	0.00265475	0.343
R3HDM1	SE	chr2	+	136473119	136473264	136467628	136467801	136479493	136479576	0.00265798	0.225
ARHGEF12	SE	chr11	+	120288237	120288366	120278446	120278532	120291461	120291560	0.00266261	-0.197
ANKZF1	SE	chr2	+	220098606	220098665	220098007	220098155	220098854	220099010	0.0026649	-0.159
DIP2B	SE	chr12	+	51086731	51086796	51084831	51084934	51089049	51089143	0.00266865	0.247
SZRD1	SE	chr1	+	16717869	16717919	16693524	16693803	16719722	16719977	0.00266914	0.14
EFTUD2	SE	chr17	-	42949813	42949938	42945654	42945718	42953301	42953468	0.00267188	0.156
R3HDM4	SE	chr19	-	899600	899629	899439	899495	900060	900146	0.00267534	0.234
YBX1	SE	chr1	+	43161884	43161959	43159160	43159194	43162850	43162933	0.00267647	0.626
TDP1	SE	chr14	+	90422921	90423028	90422245	90422314	90429451	90430017	0.00267648	-0.368
ATP2A3	SE	chr17	-	3831274	3831332	3827162	3828735	3831533	3831606	0.00268022	-0.111
STX16-NPEPL1	SE	chr20	+	57280308	57280459	57276071	57276214	57280553	57280625	0.00269739	-0.149
CYFIP2	SE	chr5	+	156715620	156715668	156712348	156712488	156721791	156721866	0.00270659	0.634
IL6R	SE	chr1	+	154421181	154421284	154420600	154420647	154422386	154422456	0.00272407	-0.115
TRPV2	SE	chr17	+	16335097	16335160	16332130	16332296	16335279	16335614	0.00280966	0.161
ADGRG1	SE	chr16	+	57689310	57689442	57687897	57688045	57689787	57689904	0.0028155	0.186
GCLC	SE	chr6	-	53370600	53370693	53370189	53370294	53371710	53371823	0.00281986	0.106
HNRNPD	SE	chr4	-	83280716	83280792	83279811	83279973	83294598	83294816	0.00282705	0.152
RPL17	SE	chr18	-	47018189	47018203	47017886	47017954	47018644	47018834	0.00284038	-0.156
JMJD1C	SE	chr10	-	64945974	64946136	64945322	64945413	64948927	64949206	0.00286422	0.152
CDC42SE2	SE	chr5	+	130651668	130651837	130599701	130599859	130694901	130695240	0.00286827	0.104
ULK2	SE	chr17	-	19684298	19684417	19683784	19683942	19685201	19685380	0.00287735	0.164
PEX2	SE	chr8	-	77900542	77900574	77898422	77898532	77912225	77912368	0.00289694	0.144
FAM188A	SE	chr10	-	15880226	15880278	15879202	15879317	15883424	15883550	0.00289726	0.215
PAPD4	SE	chr5	+	78938666	78938733	78936927	78937019	78940945	78941015	0.00295307	0.342
HOOK1	SE	chr1	+	60329496	60329540	60328455	60328549	60330303	60330338	0.00295574	-0.497
BBS2	SE	chr16	-	56535562	56535674	56535264	56535409	56536228	56536368	0.00295656	-0.183
YLPM1	SE	chr14	+	75290958	75291010	75287759	75287840	75295915	75296046	0.00295786	0.256
SMARCA2	SE	chr9	+	2170418	2170472	2161685	2161903	2181570	2181676	0.00295837	0.11
NR1D2	SE	chr3	+	23997527	23997616	23996027	23996294	24001161	24001306	0.00297082	0.156
ABR	SE	chr17	-	915713	915797	915085	915225	915927	916037	0.00297137	-0.141
TRIM21	SE	chr11	-	4414141	4414337	4411231	4411688	4414862	4414926	0.00299144	-0.116
SP100	SE	chr2	+	231328761	231328865	231327149	231327233	231331015	231331094	0.00300404	0.216
HSPA14	SE	chr10	+	14893217	14893322	14891719	14891810	14894368	14894530	0.00301584	0.224
ZHX1-C8orf76	SE	chr8	-	124243539	124243997	124238428	124238872	124250037	124250177	0.00301702	-0.168
ZNF821	SE	chr16	-	71902045	71902247	71901814	71901940	71913809	71913926	0.00301928	-0.171
ROGDI	SE	chr16	-	4851267	4851322	4850498	4850579	4851503	4851586	0.00302581	0.174
GPRASP1	SE	chrX	+	101907758	101907826	101906293	101906523	101908148	101908226	0.00304011	0.312
GMFG	SE	chr19	-	39823716	39823766	39819639	39819713	39826613	39826726	0.00305696	0.207
EIF4G1	SE	chr3	+	184033276	184033333	184032289	184032462	184037476	184037589	0.00305696	0.326
RNF10	SE	chr12	+	121008974	121009094	121004627	121004783	121013433	121013491	0.00308281	0.214
PGM1	SE	chr1	+	64104355	64104471	64101904	64102059	64114187	64114323	0.00311501	0.175
COX18	SE	chr4	-	73933745	73933850	73930966	73931130	73935033	73935476	0.0031173	0.497
KIF5B	SE	chr10	-	32327705	32327754	32327090	32327146	32329311	32329385	0.00312715	0.139
PUM2	SE	chr2	-	20478343	20478441	20462953	20463221	20482707	20482992	0.00313269	-0.206
AHCYL1	SE	chr1	+	110555518	110555621	110553835	110553979	110557384	110557479	0.00315099	0.173
IGF2R	SE	chr6	+	160485835	160485933	160485432	160485563	160489280	160489417	0.00317089	0.223
IFIH1	SE	chr2	-	163132989	163133111	163130304	163130454	163133196	163133456	0.00317089	-0.178
EMP3	SE	chr19	+	48830777	48830921	48828628	48828867	48832608	48832749	0.00317089	0.155
KANSL1	SE	chr17	-	44117063	44117250	44116392	44116581	44127898	44128070	0.00319976	-0.161
PRRC2A	SE	chr6	+	31593568	31593648	31593236	31593388	31593796	31593939	0.00320478	0.124
LRIG1	SE	chr3	-	66444463	66444627	66436404	66436725	66448535	66448607	0.00320478	0.115
PPRC1	SE	chr10	+	103904006	103904064	103902801	103902855	103906428	103907149	0.0032154	0.655
SIN3A	SE	chr15	-	75693070	75693281	75692263	75692497	75694192	75694311	0.00321747	0.193
TRIM37	SE	chr17	-	57076909	57076980	57076741	57076820	57078958	57079075	0.00323349	-0.317
RUNX1	SE	chr21	-	36265221	36265260	36259139	36259393	36421138	36421255	0.00326443	0.143
ATXN7	SE	chr3	+	63983175	63983363	63981180	63982159	63985125	63989136	0.00330078	-0.202
TMEM11	SE	chr17	-	21114379	21114540	21101262	21102153	21117403	21117908	0.00330476	-0.111
N4BP2L1	SE	chr13	-	32981386	32981475	32978339	32978408	32981781	32981909	0.00330955	0.331
MEF2BNB-MEF2B	SE	chr19	-	19267833	19267951	19261490	19261573	19291494	19291570	0.00332618	-0.109
ANKZF1	SE	chr2	+	220099547	220100034	220098007	220098155	220100429	220100597	0.00333781	-0.215
FAM98A	SE	chr2	-	33820286	33820399	33817146	33817281	33820555	33820704	0.00335965	-0.366
PNPT1	SE	chr2	-	55871771	55871855	55870453	55870560	55872483	55872567	0.00336386	0.1
CASP8	SE	chr2	+	202137627	202137665	202137360	202137499	202139611	202139676	0.00336386	0.181
MTOR	SE	chr1	-	11177060	11177143	11175452	11175525	11181302	11181425	0.00339324	0.241
POLD4	SE	chr11	-	67120764	67120903	67120458	67120548	67121009	67121067	0.00340012	0.133
ATXN2L	SE	chr16	+	28847684	28847806	28847201	28847443	28848048	28848558	0.00342462	0.131
REPS1	SE	chr6	-	139247537	139247618	139242173	139242261	139251113	139251235	0.00343058	-0.177
NAE1	SE	chr16	-	66861882	66861980	66860579	66860683	66864749	66864879	0.00343496	-0.112
SMU1	SE	chr9	-	33060462	33060539	33057595	33057712	33062046	33062175	0.00343903	0.119
FYN	SE	chr6	-	112021306	112021471	112017479	112017659	112024087	112024237	0.00344182	-0.156
ARHGEF1	SE	chr19	+	42410554	42410772	42410090	42410177	42410854	42410955	0.00344378	-0.124
DNMT1	SE	chr19	-	10244892	10244983	10244021	10244377	10246411	10246528	0.00345446	0.134
FAM63A	SE	chr1	-	150970598	150970749	150970099	150970255	150971844	150971987	0.00345859	0.261
NAAA	SE	chr4	-	76836020	76836138	76835340	76835491	76841061	76841128	0.00347792	0.16
DDHD1	SE	chr14	-	53562834	53562884	53560033	53560162	53570400	53570574	0.00349035	0.29
MAST3	SE	chr19	+	18221461	18221551	18218396	18218428	18232494	18232525	0.00349112	0.451
DPEP2	SE	chr16	-	68026412	68026539	68025966	68026096	68026852	68027160	0.00350245	0.288
SLC39A9	SE	chr14	+	69911923	69912099	69908785	69908983	69919957	69920026	0.00352352	-0.211
ZNF266	SE	chr19	-	9545473	9545535	9530740	9530894	9545783	9545869	0.00353902	0.275
UPF2	SE	chr10	-	12006731	12006835	12006007	12006124	12009339	12009453	0.00354118	-0.311
CYTH1	SE	chr17	-	76698619	76698686	76698203	76698322	76704278	76704343	0.00356178	0.107
GS1-124K5.11	SE	chr7	-	66025565	66025662	66018454	66019824	66032564	66032646	0.00356324	0.315
MAP4K4	SE	chr2	+	102487955	102488147	102486756	102486877	102490172	102490226	0.00357134	0.29
DHX9	SE	chr1	+	182811679	182811812	182808438	182808591	182821367	182821479	0.00358358	0.108
PIK3CD	SE	chr1	+	9770162	9770338	9711789	9711860	9770481	9770654	0.00358366	-0.263
NAAA	SE	chr4	-	76836060	76836138	76834808	76835491	76841061	76841128	0.00360608	0.612
WAPAL	SE	chr10	-	88232368	88232521	88231964	88232101	88233634	88233730	0.00365544	-0.156
HDAC10	SE	chr22	-	50686120	50686205	50685303	50685395	50686318	50686574	0.00367815	0.12
LONP2	SE	chr16	+	48381475	48381625	48368126	48368269	48382010	48382201	0.00368384	0.155
CNEP1R1	SE	chr16	+	50059561	50059612	50059116	50059251	50060306	50060378	0.00371376	-0.19
SUSD1	SE	chr9	-	114804380	114804445	114804146	114804240	114814678	114814718	0.00373046	-0.535
SIN3A	SE	chr15	-	75673953	75674046	75672969	75673064	75676604	75676778	0.00377341	0.174
RAB9A	SE	chrX	+	13721932	13722021	13707239	13707407	13726839	13727944	0.00377464	0.21
PAPOLG	SE	chr2	+	61014645	61014755	61014081	61014201	61018895	61019017	0.00378984	0.431
MEAF6	SE	chr1	-	37962147	37962205	37961485	37961519	37967404	37967597	0.00379693	0.12
PPP2CA	SE	chr5	-	133536025	133536187	133534776	133534895	133536675	133536765	0.00382373	0.201
ZNF335	SE	chr20	-	44586224	44586335	44582327	44582587	44586473	44586567	0.00383309	0.114
SLC35B3	SE	chr6	-	8432366	8432507	8430096	8430390	8434617	8434663	0.00384146	-0.354
AFF4	SE	chr5	-	132224770	132224865	132223788	132223852	132227855	132228096	0.00384236	0.263
IL2RG	SE	chrX	-	70328448	70328543	70328126	70328196	70329077	70329240	0.003844	0.122
TIMMDC1	SE	chr3	+	119219541	119219707	119217367	119217774	119222378	119222467	0.00385324	0.183
FASN	SE	chr17	-	80038015	80038134	80037232	80037484	80038245	80038332	0.00387601	0.116
ATXN2L	SE	chr16	+	28847731	28847806	28847201	28847443	28848048	28848558	0.00387601	0.145
ZNF335	SE	chr20	-	44586224	44586341	44582327	44582587	44586473	44586567	0.00389368	0.111
KMT2D	SE	chr12	-	49424675	49424816	49424062	49424222	49424957	49427747	0.00389411	0.121
SCAND2P	SE	chr15	+	85179082	85179143	85177054	85177612	85180577	85180651	0.00389955	-0.458
AP1G2	SE	chr14	-	24035762	24035895	24035486	24035628	24036319	24036524	0.00391288	0.108
PIAS1	SE	chr15	+	68380179	68380228	68378643	68379088	68434283	68434368	0.00391908	-0.138
FMNL1	SE	chr17	+	43312198	43312216	43311438	43311567	43314647	43314724	0.00392341	0.174
NCSTN	SE	chr1	+	160326049	160326137	160323907	160324080	160326389	160326544	0.00393157	0.116
NFS1	SE	chr20	-	34280170	34280292	34278334	34278487	34284298	34284382	0.00394339	-0.411
SLC25A45	SE	chr11	-	65148004	65148093	65147602	65147705	65149385	65149440	0.00394933	0.512
PDXDC2P	SE	chr16	-	70010713	70011906	70010201	70010635	70011979	70012015	0.00396363	0.254
NDOR1	SE	chr9	+	140110545	140110618	140110350	140110469	140110723	140113813	0.003968	-0.131
TM9SF2	SE	chr13	+	100199216	100199358	100196116	100196249	100201418	100201476	0.00396985	0.122
CLK3	SE	chr15	+	74914834	74914965	74914460	74914557	74917242	74917359	0.00396988	0.12
GSE1	SE	chr16	+	85698620	85698734	85690882	85691210	85699581	85699953	0.0039709	0.101
LMO7	SE	chr13	+	76429395	76429504	76427227	76427524	76430641	76430744	0.00399605	0.236
TNFSF10	SE	chr3	-	172227006	172227111	172223297	172224709	172241042	172241297	0.00402336	0.105
NLRP1	SE	chr17	-	5424200	5424332	5421065	5421207	5424843	5425106	0.00402825	0.104
CD44	SE	chr11	+	35231511	35231601	35229651	35229753	35232792	35232996	0.00405436	0.151
CNIH1	SE	chr14	-	54898825	54898938	54896978	54897122	54903086	54903155	0.00405883	0.152
DHX36	SE	chr3	-	153996427	153996580	153995386	153995507	153998367	153998458	0.00405911	-0.244
STAG3L1	SE	chr7	-	74994832	74994912	74994523	74994622	74995592	74995707	0.00408644	0.201
TRAF3IP2-AS1	SE	chr6	+	111886337	111886485	111804674	111804868	111895823	111896005	0.00412172	0.111
SIRT1	SE	chr10	+	69665919	69666044	69651159	69651312	69666546	69666694	0.00412172	-0.318
MTMR3	SE	chr22	+	30418017	30418128	30415468	30416873	30418597	30418686	0.00414683	0.215
MLLT10	SE	chr10	+	21962278	21962848	21959377	21959633	21970260	21970305	0.00415236	-0.187
MTMR14	SE	chr3	+	9719667	9719742	9714368	9714442	9724861	9724928	0.00419519	0.149
TMC6	SE	chr17	-	76115377	76115473	76109622	76109705	76118685	76118830	0.00420213	0.272
SLC20A1	SE	chr2	+	113404900	113405041	113404139	113404739	113405229	113405408	0.00420502	-0.16
PAPD4	SE	chr5	+	78938654	78938808	78936927	78937019	78940945	78941015	0.00421297	0.438
ERBB2IP	SE	chr5	+	65370929	65371058	65349233	65350779	65372143	65372236	0.0042215	-0.207
EVL	SE	chr14	+	100599402	100599496	100599055	100599116	100607516	100607583	0.0042215	0.774
C21orf91	SE	chr21	-	19167524	19167587	19161283	19165898	19168898	19169435	0.00423082	0.169
ARL16	SE	chr17	-	79649520	79649705	79648988	79649179	79650042	79650156	0.00426629	-0.147
PPIL4	SE	chr6	-	149859797	149859862	149856731	149856874	149862077	149862195	0.00427133	0.107
RALGAPB	SE	chr20	+	37174885	37175073	37169683	37169835	37179713	37179866	0.00427174	0.166
FAM159A	SE	chr1	+	53114122	53114297	53108534	53108674	53122461	53122737	0.00435921	-0.195
NGLY1	SE	chr3	-	25761504	25761682	25760434	25761126	25770623	25770809	0.00438463	-0.197
WRNIP1	SE	chr6	+	2773221	2773350	2770353	2770595	2779496	2779726	0.00439231	-0.171
SATB1-AS1	SE	chr3	+	18569442	18569631	18568665	18568818	18571472	18571606	0.00443511	-0.127
TRAM1	SE	chr8	-	71510368	71510487	71510125	71510246	71512253	71512317	0.00447332	-0.1
LOC729218	SE	chr4	+	119515721	119515839	119512898	119513050	119517066	119517177	0.0044889	0.141
NEMF	SE	chr14	-	50287060	50287174	50281467	50281575	50292584	50292673	0.0044889	0.217
CCM2	SE	chr7	+	45108046	45108178	45104061	45104245	45109424	45109560	0.00449075	0.116
NUP160	SE	chr11	-	47809733	47809857	47808004	47808106	47810052	47810163	0.00449222	0.201
KPNA4	SE	chr3	-	160227587	160227659	160225894	160226057	160231864	160231969	0.00449457	0.107
FLNB	SE	chr3	+	58117653	58117746	58116467	58116635	58118534	58118658	0.0044999	0.143
CDC42SE1	SE	chr1	-	151030325	151030430	151027491	151027602	151031954	151032125	0.00455185	-0.185
PPM1M	SE	chr3	+	52282336	52282378	52282168	52282253	52282652	52282716	0.00455483	-0.235
NUDT9	SE	chr4	+	88366473	88366659	88362980	88363067	88370293	88370405	0.00459515	-0.167
ZC3H13	SE	chr13	-	46575349	46575595	46562921	46563232	46577273	46577471	0.00464034	-0.144
MLXIP	SE	chr12	+	122622015	122622137	122620035	122620213	122622740	122622842	0.00464264	0.257
REC8	SE	chr14	+	24644751	24644833	24642499	24642620	24646030	24646110	0.00468071	-0.129
UNC119	SE	chr17	-	26875027	26875119	26874694	26874867	26875609	26875674	0.00471879	0.103
LAP3	SE	chr4	+	17598668	17598767	17597032	17597157	17600078	17600181	0.00475167	0.122
HSF1	SE	chr8	+	145536313	145536397	145535648	145535930	145537196	145537302	0.00475418	0.105
OAZ2	SE	chr15	-	64983632	64983790	64982572	64982748	64995227	64995480	0.00478322	0.105
NIPA2	SE	chr15	-	23019799	23019856	23014437	23014528	23021197	23021429	0.00478322	0.128
TMEM63A	SE	chr1	-	226054273	226054382	226053596	226053667	226055587	226055720	0.00484035	0.321
NUP50-AS1	SE	chr22	-	45553940	45554055	45534704	45534797	45559457	45559662	0.00484634	-0.167
[truncated: 2,580 more rows]
[truncated: 2 more columns]

[truncated: 10 more sheets: 10, 11, 12, 13, 14, 15, 16, 17, 18, 19]
